# Supplementary material for: Assessing the Effect of Public Transfer Payments on the Vulnerability of Health Care Poverty in Rural Households in China
Source: Research Square preprint supplement (doi:10.21203/rs.3.rs-764110/v1), 2021-08-09
Supplement: Supplementary file 1 [file d2e9f47ca638d23d2ed11a31.xlsx]

## Sheet: 2018 survey data 
vep1	vep2	GTP	Age	Age2_	Male	Year_edu	Fam_size	E_health
1	1	1	30	9	1	6	7	0.631502
1	1	0	50	25	0	0	4	0.763446
0	0	1	51	26.01	1	6	3	1.063
0	0	1	28	7.84	1	6	5	1.09985
1	1	0	42	17.64	1	0	3	0.86002
0	0	0	73	53.29	1	0	3	1.17886
1	1	0	50	25	0	0	3	0.675349
1	1	0	50	25	0	0	3	0.710777
1	1	0	33	10.89	1	9	3	0.754416
1	1	1	26	6.76	0	12	4	0.739794
1	1	1	50	25	0	0	4	0.774143
1	1	0	25	6.25	1	9	3	0.780314
1	1	1	37	13.69	1	12	5	0.685256
1	1	1	28	7.84	1	0	4	0.723169
1	1	1	53	28.09	1	6	7	0.723169
0	0	0	40	16	1	0	6	1.06683
1	1	0	29	8.41	1	0	4	0.827543
1	1	1	23	5.29	1	12	5	0.746627
0	0	0	30	9	1	9	3	1.01584
1	1	0	28	7.84	1	9	3	0.774143
1	1	0	27	7.29	1	9	6	0.718787
1	1	0	29	8.41	1	9	10	0.729362
0	0	0	50	25	0	0	3	1.22144
1	1	0	75	56.25	0	0	3	1.12055
1	1	0	50	25	1	15	4	0.746627
1	1	0	31	9.61	1	0	3	0.668713
0	0	1	63	39.69	1	0	6	1.06172
1	1	0	50	25	0	0	4	0.774143
1	1	0	65	42.25	1	0	2	0.803764
1	1	0	65	42.25	1	0	2	0.786897
1	1	0	65	42.25	1	0	2	0.844473
1	1	0	65	42.25	1	0	2	0.811836
1	1	0	50	25	0	0	5	0.953143
0	0	0	54	29.16	0	6	2	1.08501
0	0	0	36	12.96	1	9	5	1.02522
0	0	0	31	9.61	0	16	3	1.01584
0	0	1	50	25	1	6	4	1.11186
0	0	0	66	43.56	1	9	6	0.991916
0	0	0	60	36	1	6	3	1.13374
1	1	0	62	38.44	1	9	2	0.751486
0	0	0	51	26.01	1	6	3	1.15044
1	1	0	50	25	0	9	3	0.826194
1	1	0	44	19.36	1	9	6	0.738649
1	1	0	40	16	0	12	2	0.787187
0	0	0	66	43.56	1	6	2	1.04064
0	0	0	38	14.44	1	12	4	1.04064
1	1	1	81	65.61	1	0	2	0.924743
0	0	1	29	8.41	1	12	7	1.04593
0	0	0	42	17.64	1	9	4	0.975586
0	0	1	31	9.61	1	9	6	1.06696
1	1	1	38	14.44	0	9	3	0.767957
0	0	0	53	28.09	1	6	5	1.03591
1	1	0	26	6.76	1	12	3	0.787187
1	1	0	29	8.41	1	0	4	0.795591
1	1	1	33	10.89	1	0	4	0.803764
0	0	1	52	27.04	1	6	4	1.11776
0	0	0	38	14.44	1	9	7	1.06683
0	0	0	31	9.61	1	0	4	1.00593
1	1	0	30	9	1	9	4	0.763446
1	1	0	27	7.29	1	9	2	0.787187
1	1	1	54	29.16	1	12	3	0.851822
0	0	1	62	38.44	1	9	5	1.063
0	0	0	49	24.01	0	6	2	1.22504
1	1	0	44	19.36	1	9	3	0.874368
0	0	1	68	46.24	1	9	3	1.18092
0	0	0	50	25	0	9	3	1.07148
0	0	0	50	25	0	0	3	1.15665
1	1	0	64	40.96	1	0	3	0.756392
1	1	1	50	25	0	0	2	0.86002
1	1	1	50	25	0	9	4	0.871266
1	1	0	61	37.21	1	6	2	0.86002
0	0	0	30	9	1	9	4	1.13447
0	0	1	48	23.04	1	9	5	1.18092
0	0	1	50	25	1	6	4	1.25317
0	0	1	42	17.64	1	15	7	1.19505
1	1	0	41	16.81	1	9	6	0.86002
1	1	0	50	25	1	9	6	0.798316
0	0	0	50	25	1	0	2	1.37313
0	0	0	50	25	1	9	6	1.10368
0	0	1	50	25	1	9	6	1.34436
0	0	1	20	4	0	12	5	1.08091
0	0	0	45	20.25	1	12	3	1.06713
0	0	0	43	18.49	1	6	8	1.10368
1	1	1	50	25	0	0	6	0.787187
1	1	1	62	38.44	1	9	2	0.909492
0	0	1	59	34.81	1	9	6	1.03591
1	1	1	58	33.64	1	9	6	0.801969
0	0	1	30	9	0	6	4	1.08765
0	0	1	50	25	1	6	5	1.2698
0	1	0	25	6.25	0	9	1	0.947703
1	1	0	63	39.69	1	0	6	0.826194
0	0	0	33	10.89	1	9	6	1.08091
0	0	0	38	14.44	1	12	4	1.18092
0	0	1	37	13.69	1	9	7	1.37313
0	0	1	32	10.24	1	0	8	1.02133
1	1	0	37	13.69	0	9	3	0.814022
1	1	0	31	9.61	1	9	6	0.754416
1	1	1	80	64	0	9	6	0.739794
1	1	0	32	10.24	1	9	7	0.758754
0	0	1	50	25	1	6	6	1.13266
1	1	0	44	19.36	1	0	2	0.977554
1	1	0	36	12.96	0	9	3	1.12055
0	0	1	50	25	0	0	2	1.19055
0	0	1	46	21.16	1	6	6	1.2698
0	0	1	50	25	1	12	5	1.15044
1	1	1	45	20.25	1	9	4	0.794928
0	0	1	19	3.61	0	9	3	1.05943
1	1	1	50	25	0	16	4	0.760585
0	0	1	54	29.16	1	0	4	1.13383
0	0	1	29	8.41	1	9	4	1.13383
0	0	0	50	25	1	12	8	1.01917
0	0	1	60	36	1	12	2	1.19362
0	1	0	61	37.21	0	0	1	1.12055
0	0	1	43	18.49	1	12	6	1.07913
1	1	1	52	27.04	1	0	6	0.775207
1	1	0	30	9	1	9	4	0.787187
0	0	0	50	25	0	6	3	1.48134
1	1	1	37	13.69	1	9	6	0.793995
0	0	1	50	25	1	9	6	1.11417
1	1	1	60	36	1	9	2	0.971833
1	1	1	69	47.61	1	6	2	1
1	1	1	51	26.01	1	0	4	1.30012
0	0	1	46	21.16	1	6	6	1.10368
0	0	0	29	8.41	0	9	3	1.2698
1	1	0	32	10.24	1	15	5	0.726878
0	0	0	49	24.01	1	6	5	1.10368
0	0	0	42	17.64	1	6	5	0.978585
1	1	0	50	25	1	9	5	0.710777
0	0	1	54	29.16	1	9	2	1.09154
1	1	0	30	9	1	0	4	0.759525
1	1	1	61	37.21	1	9	4	0.86002
1	1	1	50	25	0	0	8	0.774143
1	1	1	31	9.61	1	9	6	0.814022
0	0	0	49	24.01	1	6	4	1.10499
0	0	0	50	25	1	0	7	1.1215
1	1	1	50	25	1	12	5	0.739794
1	1	1	50	25	1	12	5	0.739794
1	1	0	52	27.04	1	9	3	0.803764
1	1	0	46	21.16	1	6	4	0.764491
0	0	0	63	39.69	1	0	2	1.34282
0	1	0	50	25	0	0	1	0.956724
1	1	0	60	36	1	9	4	0.668713
1	1	0	64	40.96	1	9	3	0.855803
0	1	1	52	27.04	0	9	1	0.924743
0	0	1	64	40.96	1	0	2	1.09154
0	0	1	54	29.16	1	6	2	1.13447
1	1	1	65	42.25	1	0	2	0.909243
0	1	1	66	43.56	0	6	1	0.979042
0	0	0	61	37.21	1	9	6	1.18092
1	1	1	75	56.25	1	0	2	1.0638
0	0	1	55	30.25	1	9	4	1.21625
0	0	1	50	25	0	0	1	1.21625
1	1	1	74	54.76	1	0	2	1
1	1	1	47	22.09	1	9	5	0.782565
1	1	0	61	37.21	1	0	2	0.826194
1	1	0	78	60.84	1	9	2	0.965156
1	1	0	50	25	0	0	4	0.965156
0	1	0	50	25	0	0	1	1.2194
0	0	1	50	25	1	6	4	1.15957
1	1	1	26	6.76	1	12	8	0.858092
1	1	1	65	42.25	1	0	5	0.855803
1	1	1	61	37.21	1	0	5	0.78493
1	1	1	49	24.01	1	6	2	0.790629
0	0	0	44	19.36	1	9	4	1.02622
0	0	0	50	25	1	9	8	0.982239
1	1	0	70	49	1	15	2	0.727835
0	0	0	38	14.44	0	6	6	1.12607
0	0	0	51	26.01	1	6	8	1.08091
0	0	0	45	20.25	1	6	5	1.04632
1	1	0	66	43.56	1	0	6	0.801711
1	1	0	50	25	1	9	5	0.766507
1	1	1	50	25	0	0	2	0.906792
1	1	0	31	9.61	1	12	6	0.780314
1	1	0	50	25	1	12	5	0.749232
0	0	1	63	39.69	1	9	3	1.2698
0	0	1	50	25	1	9	3	1.21625
1	1	1	47	22.09	1	9	3	0.754
1	1	1	50	25	1	0	2	0.754
1	1	0	60	36	1	12	2	0.703859
1	1	0	31	9.61	1	6	4	0.703859
0	0	1	39	15.21	1	6	6	1.13266
0	0	1	35	12.25	1	9	4	0.95815
1	1	1	69	47.61	1	6	2	0.914382
1	1	1	78	60.84	1	9	2	1.03005
0	0	1	40	16	1	6	4	1.14212
1	1	0	30	9	1	9	4	0.804527
1	1	0	30	9	1	9	5	0.841069
0	1	0	50	25	0	0	1	0.947703
0	0	0	50	25	1	0	4	1.13447
1	1	0	45	20.25	1	6	2	0.739794
0	0	0	37	13.69	1	6	6	1.02502
1	1	0	73	53.29	1	6	2	1.0638
1	1	0	72	51.84	1	9	2	0.962619
1	1	0	71	50.41	1	9	2	0.803764
1	1	1	66	43.56	1	6	3	1
0	0	1	36	12.96	1	12	5	1.06595
0	0	1	50	25	1	6	3	1.06595
1	1	0	65	42.25	1	6	2	0.869267
0	1	1	50	25	0	0	1	0.979042
0	0	1	32	10.24	1	6	4	1.2698
0	0	1	44	19.36	1	6	4	1.10111
0	0	1	44	19.36	1	9	4	1.10213
1	1	1	53	28.09	1	6	2	0.813182
0	0	1	27	7.29	0	9	4	1.10111
0	0	0	41	16.81	1	6	5	1.04606
1	1	1	67	44.89	1	0	3	0.924743
1	1	1	50	25	1	0	3	0.924743
1	1	0	50	25	1	9	8	0.774143
0	1	0	50	25	1	9	1	0.774143
0	0	1	50	25	0	0	2	1.21625
0	0	0	39	15.21	1	9	5	1.10368
1	1	0	50	25	1	12	4	0.753587
1	1	0	50	25	1	15	3	0.697783
1	1	0	59	34.81	1	12	5	0.784344
0	0	0	31	9.61	1	16	7	1.08501
1	1	0	54	29.16	1	9	2	0.837824
1	1	0	32	10.24	1	9	2	0.746627
1	1	1	50	25	0	16	6	0.750289
1	1	0	69	47.61	0	0	2	1.09787
0	0	0	50	25	1	0	6	1.11052
0	0	1	38	14.44	1	9	4	1.04831
1	1	0	54	29.16	1	9	2	0.78994
0	0	0	65	42.25	1	6	6	1.13088
1	1	0	55	30.25	1	9	3	1.25209
1	1	0	51	26.01	1	9	2	0.823832
0	0	0	48	23.04	1	9	3	1.05532
0	0	0	48	23.04	1	9	2	1.05532
0	0	1	50	25	1	9	2	1.18092
0	0	0	71	50.41	1	9	2	1.06141
1	1	0	28	7.84	1	9	5	0.826194
0	0	1	33	10.89	1	9	8	0.992557
1	1	1	65	42.25	1	6	2	0.86002
0	0	1	18	3.24	0	12	3	1.25081
1	1	1	64	40.96	1	0	2	0.908008
1	1	1	61	37.21	1	9	2	0.924743
0	0	0	45	20.25	1	9	5	1.03801
1	1	0	50	25	1	12	3	0.739794
0	0	0	37	13.69	1	6	4	1.14212
1	1	0	48	23.04	1	9	3	0.816168
1	1	1	42	17.64	0	6	4	0.803764
0	0	0	36	12.96	1	9	4	1.18092
0	0	1	71	50.41	0	6	1	1.41008
1	1	0	25	6.25	1	6	7	0.697783
1	1	1	36	12.96	1	9	4	0.823574
1	1	1	52	27.04	1	6	5	0.787187
0	0	0	41	16.81	1	9	4	1.09703
1	1	0	51	26.01	1	0	2	0.906792
1	1	0	50	25	1	6	4	0.906792
1	1	0	28	7.84	1	6	4	0.906792
0	0	1	48	23.04	1	6	2	1.02734
1	1	1	61	37.21	1	0	2	0.846742
0	0	1	50	25	1	6	5	1.08091
0	0	1	67	44.89	1	0	6	1.12087
1	1	1	67	44.89	1	6	2	0.924743
0	0	1	50	25	1	9	6	1.07438
0	0	1	19	3.61	0	9	1	1.07438
0	0	0	80	64	0	6	1	1.46074
0	1	0	71	50.41	0	0	1	1.12055
1	1	0	50	25	0	0	2	1.0269
1	1	0	65	42.25	1	0	2	0.979042
0	0	1	64	40.96	1	9	2	1.2698
1	1	1	72	51.84	1	6	2	0.86002
1	1	1	69	47.61	1	0	3	0.83176
0	0	1	47	22.09	1	0	3	1.13447
1	1	0	64	40.96	1	12	5	0.732955
1	1	0	51	26.01	1	0	2	0.826194
1	1	0	28	7.84	1	16	2	0.826194
1	1	1	64	40.96	1	0	2	0.947703
0	1	1	65	42.25	0	0	1	0.879844
1	1	1	49	24.01	1	9	2	0.774495
0	0	0	50	25	0	0	4	1.06716
1	1	0	50	25	0	0	4	0.826194
1	1	0	28	7.84	1	12	7	0.754416
0	0	1	69	47.61	1	0	2	1.34855
1	1	1	62	38.44	1	6	3	0.863579
0	0	1	73	53.29	0	0	1	1.21212
0	0	0	69	47.61	1	9	2	1.19161
0	0	0	24	5.76	0	16	4	1.09677
1	1	0	52	27.04	1	9	4	0.85323
1	1	0	50	25	1	9	3	0.85323
0	0	1	66	43.56	1	0	2	1.2926
0	0	0	50	25	0	12	4	1.01557
1	1	0	61	37.21	1	9	2	0.81721
1	1	0	50	25	1	6	2	0.855803
1	1	0	50	25	1	9	3	0.855803
0	1	0	50	25	0	0	1	0.855803
0	0	0	61	37.21	1	12	4	1.27259
0	0	0	76	57.76	1	6	2	1.18092
1	1	0	65	42.25	1	0	5	0.685053
1	1	1	66	43.56	1	0	2	0.924743
0	0	1	66	43.56	1	6	2	1.37313
0	0	1	52	27.04	1	6	3	1.18092
1	1	1	50	25	1	12	3	0.826194
1	1	1	69	47.61	1	0	2	0.939417
1	1	1	63	39.69	1	12	2	0.906071
0	0	0	61	37.21	1	9	2	1.16967
0	0	1	62	38.44	1	9	4	1.13447
0	0	1	55	30.25	1	6	6	1.092
0	0	1	74	54.76	0	6	1	1.37313
0	0	1	69	47.61	1	6	3	1.49478
0	1	1	73	53.29	0	0	1	1.04012
0	1	1	80	64	0	0	1	1.1363
0	0	0	69	47.61	1	6	2	1.30132
1	1	0	50	25	1	6	4	0.826194
1	1	0	30	9	1	12	7	0.859587
1	1	0	64	40.96	1	9	2	0.891751
1	1	0	36	12.96	1	6	6	0.741127
0	0	0	51	26.01	1	6	2	1.13266
0	0	0	33	10.89	1	9	7	1.17291
1	1	1	66	43.56	1	0	5	0.772204
1	1	0	51	26.01	1	6	6	0.86002
0	0	0	31	9.61	1	9	6	1.06801
0	0	1	26	6.76	1	15	5	0.961447
1	1	0	43	18.49	1	9	3	0.804527
1	1	1	63	39.69	1	6	2	0.802385
1	1	1	56	31.36	1	12	2	0.787187
1	1	0	39	15.21	1	9	7	0.826194
1	1	0	55	30.25	1	9	2	0.924743
1	1	0	31	9.61	1	9	2	0.821054
1	1	1	63	39.69	1	0	5	0.826462
1	1	0	76	57.76	1	0	2	0.996315
1	1	1	53	28.09	0	6	2	0.798665
1	1	1	31	9.61	1	9	7	0.739794
1	1	0	29	8.41	1	6	4	0.787187
0	0	1	29	8.41	1	9	6	1.1188
0	0	0	50	25	1	0	2	1.21625
0	0	0	50	25	1	12	4	1.21625
0	0	1	50	25	1	9	6	1.04831
0	0	1	43	18.49	1	6	4	1.03176
1	1	0	48	23.04	0	9	2	0.72412
1	1	0	26	6.76	1	12	2	0.72412
0	1	0	50	25	1	0	1	0.979042
0	0	1	50	25	1	15	6	1.0466
1	1	0	58	33.64	1	0	5	0.958198
0	0	0	29	8.41	1	9	6	1.6722
1	1	1	70	49	1	6	2	0.841837
1	1	0	45	20.25	1	6	3	0.86002
0	1	0	50	25	0	15	1	0.86002
0	0	0	47	22.09	1	0	4	1.05584
1	1	0	46	21.16	1	9	3	0.885749
1	1	0	71	50.41	1	6	2	0.961996
0	0	0	18	3.24	0	6	3	1.19847
0	0	0	46	21.16	1	0	5	1.21625
0	1	1	61	37.21	0	6	1	0.986056
1	1	1	50	25	0	0	2	0.954558
0	1	1	85	72.25	0	0	1	1.03733
1	1	0	54	29.16	1	9	2	0.86002
0	0	0	57	32.49	1	6	3	1.18092
1	1	1	64	40.96	1	9	2	0.929389
1	1	1	45	20.25	1	9	7	0.841069
1	1	0	56	31.36	1	9	2	0.885749
1	1	1	65	42.25	1	0	2	0.961996
1	1	0	58	33.64	1	9	2	1
0	1	1	61	37.21	0	6	1	1.0553
1	1	0	61	37.21	1	9	3	0.979042
0	0	1	48	23.04	1	6	3	1.2698
0	1	1	77	59.29	0	0	1	1.04012
0	0	1	47	22.09	1	0	3	1.2698
0	1	1	53	28.09	0	9	1	1.15059
1	1	0	86	73.96	0	0	3	0.924743
1	1	0	49	24.01	1	12	3	0.841069
1	1	0	50	25	1	9	3	0.841069
0	0	1	25	6.25	0	15	4	1.06242
1	1	1	78	60.84	1	6	2	0.920821
1	1	1	74	54.76	1	6	2	0.987895
0	0	1	71	50.41	1	6	5	1.06492
1	1	0	49	24.01	1	0	2	0.86002
0	1	1	76	57.76	0	6	1	0.979042
0	0	1	52	27.04	1	6	3	1.30841
1	1	1	50	25	1	12	2	0.924743
0	0	0	50	25	1	9	4	1.1549
0	0	0	23	5.29	0	16	1	1.1549
0	0	1	39	15.21	1	0	4	1.07778
0	0	1	50	25	0	6	1	1.69306
1	1	1	66	43.56	1	6	2	0.977186
1	1	1	77	59.29	1	9	2	0.95805
0	0	0	50	25	1	9	5	1.22144
1	1	1	54	29.16	1	6	2	0.935443
1	1	1	50	25	1	9	4	0.793607
0	0	0	36	12.96	1	9	4	1.30132
1	1	1	54	29.16	1	9	2	0.86002
1	1	1	25	6.25	1	0	3	0.86002
1	1	1	64	40.96	1	12	2	0.843779
1	1	1	58	33.64	1	6	5	0.826194
1	1	1	69	47.61	1	0	3	0.86002
1	1	1	58	33.64	1	12	3	0.787807
1	1	1	61	37.21	1	9	3	0.892821
1	1	1	54	29.16	1	9	3	0.852327
0	0	1	50	25	0	0	5	1.13447
1	1	1	61	37.21	1	0	5	0.924743
0	0	0	34	11.56	1	9	7	1.10368
1	1	0	72	51.84	1	0	4	0.826194
0	1	0	66	43.56	0	0	1	1
0	1	1	64	40.96	0	9	1	1.05862
0	1	1	70	49	0	6	1	1
1	1	0	62	38.44	1	6	3	1.0638
1	1	0	50	25	1	9	3	0.83249
1	1	1	32	10.24	1	6	7	0.936016
1	1	0	61	37.21	1	9	3	0.89913
1	1	0	50	25	0	0	3	0.89913
1	1	0	50	25	1	12	6	0.979042
1	1	1	63	39.69	1	12	6	0.765233
0	0	0	39	15.21	1	9	6	1.03384
1	1	1	40	16	1	9	5	0.803764
0	0	0	50	25	1	6	4	1.19161
0	0	0	40	16	1	12	5	1.03455
0	0	1	26	6.76	1	12	4	0.95815
0	0	1	45	20.25	1	9	4	1.07686
0	0	1	50	25	1	9	6	1.07237
1	1	0	24	5.76	0	15	4	0.758754
1	1	0	31	9.61	1	9	6	0.732023
0	0	0	52	27.04	1	9	4	1.04461
1	1	0	26	6.76	1	12	8	0.744838
0	0	0	50	25	1	6	4	1.17857
0	0	0	55	30.25	1	9	7	1.04516
0	0	0	30	9	1	15	6	1.00555
0	0	0	31	9.61	1	9	7	1.0076
1	1	1	50	25	0	0	5	0.787187
1	1	1	51	26.01	1	9	2	0.771281
0	0	1	67	44.89	1	0	2	1.11961
0	1	0	24	5.76	0	12	1	0.774143
0	0	1	45	20.25	1	6	3	1.11961
0	0	0	41	16.81	1	9	6	1.02452
1	1	1	40	16	1	9	3	0.750309
0	0	0	35	12.25	1	9	6	1.02985
0	0	0	35	12.25	1	9	7	1.02985
1	1	1	53	28.09	1	9	2	0.739794
1	1	0	53	28.09	1	9	2	0.910077
1	1	0	31	9.61	1	9	4	0.760585
0	0	0	63	39.69	1	0	3	1.24515
1	1	0	45	20.25	1	12	4	0.803764
1	1	1	47	22.09	1	6	4	0.771281
1	1	1	29	8.41	1	9	9	0.749385
0	0	0	46	21.16	1	6	6	1.06211
0	0	0	49	24.01	1	6	4	1.18092
0	1	0	60	36	0	0	1	1.12055
1	1	1	29	8.41	1	9	7	0.785015
1	1	1	65	42.25	1	0	2	0.895353
1	1	1	45	20.25	1	9	7	0.745825
0	0	1	23	5.29	0	9	4	1.06191
1	1	1	64	40.96	1	9	3	0.762824
1	1	0	50	25	1	14	4	0.744487
1	1	0	60	36	1	12	2	0.772068
1	1	1	67	44.89	1	12	5	0.756112
1	1	1	47	22.09	1	9	6	0.747285
0	0	1	50	25	1	9	5	1.02522
1	1	1	20	4	0	12	5	0.809555
0	0	0	34	11.56	1	9	4	1.08091
0	0	1	38	14.44	1	9	6	1
0	1	1	69	47.61	0	6	1	1.00581
1	1	0	50	25	0	0	2	0.892821
0	0	0	29	8.41	1	6	6	1.10187
1	1	0	50	25	1	9	7	0.706513
1	1	0	65	42.25	1	6	3	0.906792
0	0	1	45	20.25	1	6	6	1.04541
1	1	0	20	4	0	9	5	0.763446
0	0	0	49	24.01	1	6	2	1.12246
0	0	0	26	6.76	1	9	3	1.12246
1	1	1	30	9	1	9	6	0.86002
1	1	1	28	7.84	1	9	4	0.738055
1	1	1	31	9.61	1	0	5	0.780314
1	1	1	20	4	0	12	6	0.753731
0	0	1	28	7.84	1	16	8	0.97584
0	0	1	50	25	1	0	3	1.18092
1	1	0	50	25	0	0	5	0.951475
1	1	0	50	25	1	9	2	0.826194
0	0	0	40	16	1	12	6	1.063
0	0	0	66	43.56	1	0	6	1.063
1	1	1	50	25	0	0	8	0.732179
1	1	1	50	25	1	15	8	0.727082
1	1	0	53	28.09	1	12	3	0.787187
0	1	0	23	5.29	0	15	1	0.787187
1	1	1	53	28.09	1	9	2	0.812376
1	1	0	50	25	1	6	2	0.794289
1	1	0	29	8.41	0	15	3	0.774143
0	0	0	51	26.01	1	6	2	1.06872
0	0	1	22	4.84	0	9	3	1.06082
0	0	1	31	9.61	1	9	6	0.891245
1	1	0	62	38.44	1	9	2	0.89913
0	0	1	65	42.25	1	6	3	1.22322
1	1	0	62	38.44	1	9	2	0.849836
1	1	0	43	18.49	1	9	4	0.783929
1	1	1	58	33.64	1	12	3	0.721468
1	1	1	34	11.56	1	12	3	0.721468
0	0	0	45	20.25	1	6	4	1.06807
0	0	0	56	31.36	1	9	4	1.07803
0	0	1	44	19.36	1	9	5	1.10368
0	0	1	34	11.56	1	12	5	1.05177
0	0	0	33	10.89	1	9	6	1.02346
1	1	1	47	22.09	1	9	2	0.759406
1	1	1	58	33.64	1	12	3	0.779835
1	1	1	45	20.25	1	6	3	0.841069
1	1	1	62	38.44	1	9	2	0.781363
1	1	1	57	32.49	1	9	4	0.792029
1	1	0	50	25	1	9	3	0.836879
0	0	1	66	43.56	1	12	6	1.015
1	1	0	28	7.84	1	6	4	0.758754
0	0	1	51	26.01	1	6	3	1.10533
1	1	1	66	43.56	1	0	5	0.924743
1	1	0	50	25	0	0	5	0.833227
0	0	0	69	47.61	1	0	2	1.37313
1	1	0	46	21.16	1	6	3	0.800619
0	0	0	50	25	0	12	3	1.18092
0	0	0	52	27.04	1	6	2	1.12246
0	0	1	55	30.25	0	0	1	1.37313
1	1	0	33	10.89	1	6	3	0.822302
0	0	0	33	10.89	1	6	4	1.11776
0	0	0	50	25	1	0	4	1.09961
0	0	1	45	20.25	1	6	4	1.063
1	1	0	49	24.01	1	15	2	0.89913
0	0	0	45	20.25	1	6	5	1.10368
0	0	0	58	33.64	1	0	4	1.13159
0	0	1	41	16.81	1	9	4	1.05755
1	1	0	26	6.76	0	9	6	0.826194
1	1	1	50	25	1	6	4	0.786106
1	1	1	42	17.64	1	0	4	0.99768
1	1	1	67	44.89	0	0	2	0.99768
1	1	1	34	11.56	1	6	7	0.738555
1	1	1	52	27.04	1	0	2	0.774143
1	1	0	36	12.96	1	9	6	0.740917
1	1	0	61	37.21	1	9	4	0.786321
0	1	0	34	11.56	1	9	1	0.786321
0	1	0	38	14.44	1	9	1	0.786321
1	1	1	47	22.09	1	6	2	0.826194
1	1	1	50	25	1	6	6	0.746692
1	1	1	62	38.44	1	9	2	0.826194
1	1	0	55	30.25	1	6	6	0.86002
0	0	1	60	36	1	9	3	1.21625
1	1	1	46	21.16	1	6	3	0.826194
0	1	1	23	5.29	0	15	1	0.826194
1	1	1	50	25	1	9	4	0.759616
0	0	1	49	24.01	1	9	3	1.10368
1	1	0	52	27.04	1	0	3	0.86002
0	0	1	50	25	0	0	4	1.21625
0	0	1	50	25	1	6	4	1.12742
0	0	1	48	23.04	1	9	2	1.21625
0	0	1	26	6.76	1	12	3	1.21625
0	0	1	58	33.64	1	0	6	1.12055
0	0	1	58	33.64	1	9	3	1.13447
1	1	0	52	27.04	1	6	4	0.841069
0	0	1	67	44.89	1	9	2	1.30132
1	1	1	62	38.44	1	9	4	0.89215
0	0	1	48	23.04	1	6	5	1.11044
0	0	1	50	25	1	12	6	1.063
0	0	1	50	25	0	0	2	1.15957
1	1	1	62	38.44	1	9	3	0.91987
1	1	0	66	43.56	1	0	2	0.924743
0	0	1	38	14.44	1	6	4	1.16146
0	0	1	58	33.64	1	0	2	1.28735
1	1	1	54	29.16	1	6	5	0.767788
1	1	0	55	30.25	1	12	2	0.739794
0	1	0	50	25	0	12	1	0.86002
0	0	1	54	29.16	1	12	3	1.11044
0	0	1	27	7.29	1	16	3	1.11044
1	1	0	50	25	1	12	3	0.794928
0	0	0	68	46.24	1	9	6	1.08091
1	1	1	34	11.56	1	12	5	0.763937
0	0	1	62	38.44	1	6	7	1.08091
0	0	0	25	6.25	0	12	4	0.867895
0	0	0	50	25	1	0	3	0.867895
1	1	0	32	10.24	1	9	4	0.810601
1	1	1	36	12.96	1	12	7	0.735023
1	1	0	38	14.44	1	9	4	0.766455
0	0	0	35	12.25	1	9	7	1.12742
1	1	1	43	18.49	1	9	3	0.885749
1	1	0	60	36	1	0	8	0.739794
1	1	0	50	25	1	6	2	0.761183
0	0	1	62	38.44	1	0	8	1.09667
1	1	0	47	22.09	0	9	3	0.779079
0	0	1	58	33.64	1	6	2	1.13447
1	1	0	50	25	1	6	4	1.01803
0	0	1	25	6.25	0	9	5	1.06789
1	1	1	59	34.81	1	6	2	0.803764
0	0	1	42	17.64	1	9	4	0.956177
0	0	1	50	25	1	6	3	1.04187
1	1	0	39	15.21	1	9	5	0.713715
1	1	0	59	34.81	1	12	2	1.23299
1	1	0	50	25	1	9	7	0.81834
0	0	1	24	5.76	0	9	5	1.2698
1	1	0	40	16	1	9	4	0.784344
0	0	0	52	27.04	1	9	2	1.21625
0	0	1	49	24.01	1	9	4	1.063
0	0	0	45	20.25	1	6	4	1.07148
0	0	0	44	19.36	1	12	5	1.0458
0	0	0	48	23.04	1	0	4	1.00813
1	1	1	26	6.76	1	16	3	0.787187
0	0	1	38	14.44	1	9	4	1.09245
1	1	1	69	47.61	1	12	2	0.735889
1	1	0	50	25	1	9	3	0.739794
0	1	0	24	5.76	0	16	1	0.739794
0	1	0	77	59.29	0	6	1	1.12055
0	0	1	44	19.36	1	6	4	1.10368
1	1	1	56	31.36	1	9	6	0.752044
1	1	0	37	13.69	1	9	4	0.803764
0	0	0	53	28.09	1	6	6	1.10368
0	0	1	50	25	1	9	5	1.07701
1	1	1	66	43.56	1	0	2	1.04934
1	1	1	25	6.25	0	12	3	0.76176
1	1	1	65	42.25	1	6	2	0.937758
0	0	0	43	18.49	1	9	4	1.0902
1	1	0	50	25	0	0	6	0.693647
0	0	0	60	36	1	0	2	1.24515
1	1	0	73	53.29	0	0	2	0.86002
1	1	1	66	43.56	1	0	2	0.800981
0	0	1	51	26.01	1	0	5	1.36084
0	0	1	50	25	1	6	5	1.07816
0	0	1	59	34.81	1	0	2	1.24253
1	1	0	73	53.29	1	9	2	0.823062
1	1	1	56	31.36	1	9	5	0.751328
1	1	1	50	25	0	0	3	0.751328
1	1	1	50	25	1	16	8	0.735353
0	0	1	60	36	1	12	13	1.0591
1	1	1	50	25	1	9	6	0.787187
1	1	1	68	46.24	0	0	2	1.0638
0	1	0	77	59.29	0	6	1	0.811836
1	1	1	51	26.01	1	6	3	0.920439
1	1	1	31	9.61	0	0	2	0.89913
0	0	1	47	22.09	1	0	4	1.07855
0	0	1	52	27.04	1	6	2	1.01584
0	0	1	52	27.04	1	0	3	1.07365
1	1	1	50	25	0	0	2	0.967108
1	1	1	27	7.29	1	9	4	0.826194
1	1	0	27	7.29	1	9	4	0.979042
0	0	1	23	5.29	0	15	5	1.08032
1	1	1	42	17.64	1	0	4	0.86002
0	0	0	61	37.21	1	9	2	1.08091
0	0	0	50	25	0	0	4	1.08091
1	1	1	70	49	1	6	2	0.885749
0	0	1	57	32.49	1	12	8	1.063
0	0	1	69	47.61	1	0	2	1.37313
1	1	1	69	47.61	1	6	2	1.0269
1	1	1	50	25	1	9	2	0.903638
1	1	1	35	12.25	1	6	6	0.868776
1	1	1	63	39.69	1	0	2	1.0269
0	0	1	69	47.61	1	0	2	1.34436
1	1	1	36	12.96	1	0	9	0.907115
1	1	0	57	32.49	1	12	3	0.767191
0	0	1	50	25	1	9	7	1.2698
1	1	1	46	21.16	1	9	5	0.915271
0	0	0	75	56.25	0	9	2	1.19706
0	0	0	24	5.76	0	9	6	1.13447
1	1	0	50	25	1	12	3	0.826194
0	0	0	49	24.01	1	6	6	1.2698
1	1	0	63	39.69	1	6	3	0.808689
1	1	0	49	24.01	1	9	2	0.924743
1	1	0	28	7.84	1	12	7	0.739794
1	1	1	50	25	1	15	5	0.727238
0	1	0	67	44.89	0	6	1	0.979042
1	1	0	52	27.04	1	0	3	0.774791
1	1	1	50	25	0	9	4	0.774143
1	1	1	51	26.01	1	9	4	0.906792
1	1	1	50	25	1	12	3	0.754416
0	0	1	37	13.69	1	9	6	1.063
0	1	0	50	25	0	0	1	1.19307
1	1	0	50	25	0	0	6	0.924743
0	0	0	50	25	1	6	3	1.11776
0	0	0	29	8.41	1	9	3	1.11776
0	0	1	45	20.25	1	6	4	1.02802
1	1	1	31	9.61	1	9	6	0.739794
1	1	0	48	23.04	1	9	4	0.754416
1	1	0	48	23.04	1	9	2	0.754416
1	1	0	64	40.96	1	9	5	0.787187
1	1	1	62	38.44	0	9	4	0.808689
1	1	0	26	6.76	1	9	6	0.803764
1	1	0	54	29.16	1	9	4	0.826194
1	1	0	50	25	0	0	2	0.826194
1	1	0	34	11.56	1	9	3	3.69897
1	1	0	50	25	0	0	3	3.69897
1	1	0	50	25	0	0	6	0.841069
1	1	0	34	11.56	1	15	9	0.768551
0	1	0	50	25	0	0	1	0.768551
0	1	0	50	25	0	0	1	1
1	1	1	32	10.24	1	9	5	0.725901
1	1	1	56	31.36	1	9	4	0.803764
0	0	0	43	18.49	1	9	5	1.08091
0	0	0	58	33.64	1	6	2	1.18092
1	1	1	46	21.16	1	6	3	0.739794
0	0	1	54	29.16	1	9	9	1.01922
1	1	0	63	39.69	1	0	5	0.761523
0	0	0	40	16	1	6	5	1.0849
0	0	1	62	38.44	1	9	6	1.18092
0	0	1	37	13.69	1	6	4	1.10368
0	0	0	63	39.69	1	0	5	1.37313
1	1	0	62	38.44	1	6	2	0.841069
1	1	0	72	51.84	1	6	2	0.86002
1	1	1	24	5.76	0	12	3	0.75597
1	1	0	62	38.44	1	6	6	0.767494
1	1	1	66	43.56	1	9	3	0.841069
1	1	0	51	26.01	1	9	3	0.754
1	1	1	35	12.25	1	9	6	0.759809
1	1	0	69	47.61	1	9	2	0.803764
0	0	1	50	25	0	0	5	1.05932
1	1	0	50	25	0	0	2	0.89913
1	1	1	62	38.44	1	0	6	0.792853
1	1	1	64	40.96	1	0	2	0.826194
1	1	1	56	31.36	1	6	2	0.885749
0	0	1	50	25	1	0	6	1.09788
0	0	1	50	25	1	6	4	1.13447
1	1	1	26	6.76	1	9	4	0.779283
0	0	1	59	34.81	1	9	6	1.10368
0	0	0	43	18.49	1	0	4	1.09837
1	1	1	62	38.44	1	0	5	0.693067
0	0	1	50	25	1	0	5	1.18092
0	0	1	50	25	1	6	2	1.18092
0	0	1	50	25	1	0	6	1.18092
1	1	0	36	12.96	1	9	3	0.7781
0	0	1	49	24.01	1	6	4	1.15582
1	1	1	67	44.89	1	9	2	0.89215
0	0	1	66	43.56	1	0	2	1.33783
1	1	1	50	25	0	0	2	0.802636
0	0	1	56	31.36	1	9	2	1.10368
0	0	1	29	8.41	1	9	3	1.10368
1	1	1	67	44.89	1	6	2	0.867755
1	1	1	62	38.44	1	9	2	0.816625
1	1	1	64	40.96	1	0	3	0.747521
1	1	1	50	25	1	6	9	0.79728
1	1	0	26	6.76	1	6	5	0.754416
1	1	0	51	26.01	1	9	2	0.869267
0	0	0	50	25	0	0	5	1.10368
1	1	0	50	25	0	6	2	0.806278
1	1	0	35	12.25	1	9	5	0.803764
0	0	0	55	30.25	1	0	2	1.20062
0	0	0	35	12.25	1	9	3	1.20062
1	1	0	52	27.04	1	6	3	0.826194
0	1	0	66	43.56	0	6	1	0.926775
1	1	0	74	54.76	1	0	5	0.906792
1	1	0	45	20.25	1	9	2	0.780836
0	0	1	72	51.84	0	6	2	1.42393
0	1	1	77	59.29	0	0	1	1.06487
1	1	0	55	30.25	1	9	6	0.692377
0	0	0	54	29.16	1	12	8	1.05387
0	0	0	34	11.56	1	15	13	0.906663
1	1	0	64	40.96	1	9	2	0.803198
0	0	1	68	46.24	1	6	2	1.30783
0	1	0	78	60.84	0	0	1	1.21748
0	0	0	34	11.56	1	12	6	1.08091
1	1	0	50	25	0	0	2	0.896828
0	0	1	52	27.04	1	0	6	1.38671
0	0	1	29	8.41	1	9	3	1.10368
1	1	0	74	54.76	1	9	2	0.743159
1	1	0	74	54.76	1	0	2	1.0269
1	1	0	63	39.69	1	0	2	0.911089
0	1	1	57	32.49	0	0	1	0.919681
1	1	0	50	25	1	0	2	0.905199
0	0	1	64	40.96	1	0	2	1.2698
0	0	1	43	18.49	1	9	5	1.03591
1	1	1	51	26.01	1	12	4	0.759799
1	1	1	68	46.24	1	9	5	0.774143
1	1	1	36	12.96	1	9	3	0.988934
0	0	1	53	28.09	1	9	4	1.23463
1	1	1	52	27.04	1	9	7	0.803764
1	1	1	52	27.04	1	12	4	0.803764
1	1	1	29	8.41	1	9	5	0.803764
0	0	0	50	25	1	9	5	1.07377
1	1	1	62	38.44	0	9	2	0.832931
0	0	1	74	54.76	0	6	5	1.35069
1	1	1	48	23.04	1	9	3	0.83176
1	1	1	50	25	0	0	2	0.83176
0	0	1	34	11.56	1	9	6	1.11776
1	1	1	31	9.61	1	6	6	0.837824
0	0	1	50	25	0	16	6	1.11044
1	1	1	50	25	0	9	2	0.814022
0	0	1	29	8.41	1	12	5	1.01064
0	0	0	47	22.09	1	6	2	1.10368
0	0	1	29	8.41	1	12	6	1.1223
1	1	0	50	25	0	0	5	0.754416
0	0	1	85	72.25	0	6	2	1.10368
0	0	1	52	27.04	1	6	5	1.08574
1	1	0	31	9.61	1	9	4	0.774143
1	1	1	55	30.25	1	9	2	0.924743
0	1	0	23	5.29	0	9	1	0.883332
0	1	0	73	53.29	0	6	1	1.24032
1	1	1	51	26.01	0	9	4	0.924743
0	0	1	50	25	1	9	2	1.03534
0	0	1	50	25	1	9	3	1.03534
1	1	0	52	27.04	1	15	6	0.834664
0	0	0	59	34.81	1	6	5	1.13447
1	1	1	38	14.44	1	12	5	0.86002
0	0	1	50	25	1	6	4	1.10822
1	1	1	68	46.24	1	0	4	1.03837
1	1	1	74	54.76	1	6	2	0.987689
1	1	1	69	47.61	1	6	2	0.86002
1	1	1	62	38.44	1	9	4	0.848052
0	0	0	45	20.25	1	6	4	1.05104
1	1	1	33	10.89	1	12	8	0.763524
1	1	0	84	70.56	0	9	3	0.794928
0	0	0	45	20.25	1	6	3	1.20814
1	1	0	48	23.04	1	9	3	0.844473
1	1	0	51	26.01	1	9	4	0.757505
0	0	0	63	39.69	1	0	6	1.063
0	0	0	50	25	1	0	4	1.063
1	1	1	50	25	1	12	7	0.770874
0	0	1	50	25	1	0	6	1.07076
1	1	1	63	39.69	1	9	2	0.961996
1	1	1	50	25	0	0	4	0.961996
1	1	1	65	42.25	1	0	2	0.934028
0	0	1	53	28.09	1	6	3	1.08091
0	0	0	75	56.25	1	6	2	1.13088
1	1	1	43	18.49	1	9	4	0.748626
1	1	1	50	25	1	9	6	0.787187
1	1	1	50	25	1	9	6	0.732079
1	1	1	23	5.29	1	15	2	0.732079
1	1	1	44	19.36	1	9	3	0.82474
1	1	1	44	19.36	1	12	4	0.762093
1	1	1	61	37.21	1	12	2	0.947703
1	1	1	49	24.01	1	9	5	0.739794
1	1	1	50	25	1	9	7	0.754416
1	1	1	26	6.76	1	12	5	0.760771
0	0	1	27	7.29	0	9	4	1.07319
1	1	1	50	25	1	9	5	0.819104
0	0	1	55	30.25	1	6	5	1.08
0	0	1	50	25	0	0	4	1.063
0	0	1	59	34.81	1	6	2	1.10478
1	1	0	33	10.89	1	16	3	0.714626
1	1	1	50	25	0	0	4	0.758754
1	1	0	50	25	0	0	3	0.924743
1	1	1	27	7.29	1	0	6	0.803764
1	1	1	33	10.89	1	16	6	0.688213
1	1	0	50	25	1	15	2	0.794928
0	0	0	55	30.25	1	9	5	1.24515
1	1	0	34	11.56	1	9	4	0.803764
0	0	0	29	8.41	1	6	6	1.06487
1	1	1	52	27.04	1	12	5	0.746627
0	0	0	48	23.04	1	0	6	1.09776
0	0	0	50	25	1	0	3	1.063
1	1	0	28	7.84	1	0	2	0.754416
1	1	0	36	12.96	1	15	4	0.678297
1	1	0	50	25	0	0	3	0.86002
1	1	0	28	7.84	1	12	7	0.784344
0	0	1	34	11.56	1	9	10	0.997893
0	0	1	32	10.24	1	9	5	1.03502
0	0	1	32	10.24	1	9	8	1.08089
1	1	0	30	9	1	12	2	0.73667
1	1	1	29	8.41	1	0	5	0.739794
1	1	1	50	25	0	0	3	0.947703
1	1	1	31	9.61	1	0	3	0.947703
0	0	1	50	25	1	9	5	1.12698
1	1	0	28	7.84	1	6	4	1.33145
1	1	0	50	25	1	15	3	0.754416
1	1	0	28	7.84	1	9	4	0.774143
1	1	0	50	25	0	0	3	0.795591
0	0	0	40	16	1	0	7	0.991916
0	0	1	32	10.24	1	15	8	0.960141
1	1	0	50	25	1	9	4	0.803764
1	1	0	24	5.76	1	0	4	0.768551
1	1	1	50	25	0	9	8	0.736854
1	1	1	36	12.96	1	9	6	0.869267
1	1	1	63	39.69	1	0	5	0.711675
1	1	0	32	10.24	1	0	3	0.710777
0	0	1	29	8.41	1	15	7	1.2698
1	1	0	50	25	1	12	4	0.869267
1	1	1	32	10.24	1	15	5	0.885749
1	1	1	50	25	0	0	3	0.905992
0	0	1	17	2.89	0	12	5	1.18092
1	1	1	50	25	1	0	4	0.91092
1	1	1	43	18.49	1	9	4	0.803764
1	1	1	50	25	1	0	3	0.710408
1	1	1	29	8.41	1	9	8	0.841736
1	1	0	50	25	0	0	3	0.671581
1	1	1	50	25	1	9	4	0.739794
1	1	1	50	25	1	9	6	0.697783
0	0	0	41	16.81	1	12	4	0.95815
1	1	0	50	25	0	0	3	0.754416
0	0	0	43	18.49	0	0	3	1.11776
1	1	1	29	8.41	1	15	4	0.797537
1	1	1	25	6.25	1	0	7	0.742765
1	1	0	50	25	0	0	3	0.803764
1	1	0	23	5.29	1	0	4	0.73372
0	0	0	29	8.41	1	0	8	0.95815
1	1	0	47	22.09	0	0	2	0.760585
1	1	0	29	8.41	1	9	4	0.86002
0	0	1	66	43.56	1	0	4	1.31676
0	0	0	50	25	0	0	8	1.063
1	1	0	50	25	1	9	4	0.725629
1	1	0	27	7.29	1	0	4	0.683524
1	1	0	55	30.25	1	6	5	0.808689
1	1	0	33	10.89	1	9	3	0.826194
1	1	0	50	25	1	15	3	0.799383
1	1	0	50	25	1	15	4	0.765324
0	0	1	50	25	0	0	2	1.46074
1	1	1	50	25	1	6	3	0.794436
0	0	1	46	21.16	1	15	5	1.05358
1	1	0	50	25	1	9	2	0.795259
0	0	1	50	25	0	0	3	1.11776
0	0	0	46	21.16	1	9	4	0.992685
0	0	1	50	25	1	9	7	1.11476
0	0	1	50	25	1	9	6	1.05755
0	0	1	49	24.01	1	9	4	1.09477
0	0	1	82	67.24	0	0	3	1.12742
0	0	0	67	44.89	1	0	2	1.46074
0	0	1	50	25	1	6	6	1.04541
0	0	1	50	25	1	9	6	0.953414
0	0	0	34	11.56	1	9	6	1.07953
0	0	0	24	5.76	1	6	6	1.063
1	1	1	41	16.81	1	12	4	0.826194
0	0	0	62	38.44	1	9	5	1.21625
0	0	1	50	25	0	0	4	1.13447
1	1	1	50	25	0	0	4	0.915271
0	0	0	31	9.61	1	0	6	1.18092
1	1	1	58	33.64	1	6	2	0.770946
1	1	1	51	26.01	1	6	2	0.826194
0	0	1	31	9.61	1	9	6	1.02694
0	0	1	66	43.56	1	0	2	1.28783
1	1	1	50	25	1	9	5	0.871013
1	1	1	52	27.04	1	6	6	0.86002
0	0	1	34	11.56	1	6	5	1.10368
1	1	0	50	25	1	0	2	0.924743
0	0	1	50	25	1	6	2	1.21625
1	1	1	66	43.56	1	6	5	0.754416
0	0	1	17	2.89	0	9	3	1.37313
1	1	1	63	39.69	1	0	2	0.826194
0	0	1	67	44.89	1	12	2	1.41008
0	0	1	65	42.25	1	0	6	1.10336
1	1	0	56	31.36	1	6	5	0.962776
0	0	0	50	25	1	0	4	1.69306
1	1	0	49	24.01	1	6	3	0.961996
0	0	1	45	20.25	1	0	6	1.03758
0	0	1	71	50.41	1	6	2	1.37313
1	1	1	74	54.76	1	6	4	1.05862
0	0	1	50	25	1	0	2	1.37313
0	0	0	58	33.64	1	0	2	1.19498
1	1	0	69	47.61	1	6	2	0.805299
0	0	1	47	22.09	0	6	4	1.0702
0	0	0	50	25	1	0	2	1.25927
0	1	0	70	49	0	0	1	0.935443
0	0	1	78	60.84	0	6	1	0.975142
0	0	1	50	25	1	6	2	1.13447
1	1	0	41	16.81	0	12	3	0.816283
1	1	1	66	43.56	1	0	2	0.826194
1	1	1	38	14.44	1	9	3	0.826194
1	1	1	70	49	1	9	2	0.743964
1	1	0	79	62.41	1	6	2	0.631836
0	0	1	61	37.21	1	6	2	0.894241
0	0	1	68	46.24	1	6	2	0.895412
0	0	1	44	19.36	1	9	5	0.86914
0	0	1	46	21.16	0	9	2	1.08376
0	0	0	52	27.04	1	0	2	1.07255
1	1	1	66	43.56	1	6	2	0.717715
0	0	1	53	28.09	1	6	3	1.0568
0	0	1	67	44.89	1	6	2	1.01862
1	1	1	58	33.64	1	0	2	0.873947
1	1	1	75	56.25	1	9	2	0.826194
0	0	0	54	29.16	1	6	3	1.07475
0	0	0	61	37.21	1	0	3	1.13822
1	1	1	60	36	1	0	2	0.897254
1	1	1	48	23.04	1	9	2	0.798787
1	1	1	68	46.24	1	0	2	0.851822
1	1	1	50	25	1	9	2	0.814022
0	0	1	50	25	1	0	3	1.1043
0	0	1	50	25	1	6	2	1.05321
0	0	1	36	12.96	1	9	6	1.12368
0	0	1	50	25	1	6	4	1.10368
1	1	1	30	9	0	9	3	0.739794
1	1	1	65	42.25	1	0	2	0.91987
1	1	1	60	36	1	9	2	0.86002
1	1	1	50	25	1	9	5	0.787187
1	1	1	50	25	1	12	3	0.848052
0	0	0	69	47.61	1	0	2	1.14872
0	0	0	50	25	1	0	5	1.12087
1	1	1	62	38.44	1	6	2	0.947703
1	1	1	47	22.09	1	9	3	0.86002
0	1	1	50	25	0	0	1	1.0269
0	0	1	58	33.64	1	0	2	1.24515
1	1	1	50	25	1	6	2	0.827271
0	0	1	50	25	1	9	4	1.09384
1	1	1	32	10.24	1	15	6	0.728783
0	0	1	50	25	1	0	2	1.07377
0	0	1	67	44.89	0	0	1	1.37313
1	1	1	50	25	1	6	2	0.885749
1	1	1	59	34.81	1	9	2	0.795259
1	1	1	48	23.04	1	9	3	0.787699
1	1	1	67	44.89	1	0	5	0.774143
1	1	0	50	25	1	0	2	0.897683
0	0	1	48	23.04	0	9	2	1.18899
1	1	1	75	56.25	0	0	3	0.836443
1	1	1	50	25	1	12	2	0.77426
1	1	1	64	40.96	1	12	2	0.823832
1	1	1	50	25	1	6	3	0.768765
1	1	1	62	38.44	1	0	2	0.86002
1	1	1	50	25	1	9	2	0.67717
1	1	1	43	18.49	1	9	3	0.787187
0	1	1	69	47.61	0	6	1	0.774143
0	0	1	32	10.24	1	9	5	1.08695
1	1	1	46	21.16	1	6	3	0.86002
0	1	0	50	25	0	0	1	0.763446
1	1	1	64	40.96	1	12	2	0.846959
1	1	0	78	60.84	1	9	2	0.787187
1	1	1	54	29.16	1	0	2	0.778647
0	1	1	70	49	0	0	1	1.08859
1	1	1	66	43.56	1	0	2	0.924743
1	1	1	24	5.76	0	9	3	0.747359
1	1	1	50	25	0	0	3	0.734565
1	1	1	35	12.25	1	16	6	0.774378
0	0	0	50	25	1	0	5	0.990029
1	1	0	65	42.25	1	0	2	0.798316
0	0	0	55	30.25	1	0	9	1.03684
0	0	1	56	31.36	1	9	2	1.02312
0	0	1	50	25	1	0	4	1.02312
1	1	0	50	25	0	6	4	0.763446
0	0	1	50	25	0	6	1	1.05846
0	1	0	81	65.61	0	6	1	0.809721
0	0	1	50	25	1	6	5	1.10368
1	1	1	54	29.16	1	6	3	0.739794
1	1	0	73	53.29	1	6	2	0.924743
0	0	1	55	30.25	1	9	5	1.03086
0	0	1	45	20.25	1	6	4	1.07355
0	0	1	50	25	1	0	3	1.07355
1	1	1	54	29.16	1	0	3	0.761841
0	0	1	64	40.96	1	6	4	1.10368
1	1	0	61	37.21	1	9	3	0.86002
1	1	0	32	10.24	1	9	3	0.761712
1	1	1	27	7.29	0	12	3	0.702813
0	1	1	27	7.29	0	12	1	0.702813
1	1	1	51	26.01	1	6	3	0.863443
1	1	1	35	12.25	1	12	4	0.774143
1	1	1	35	12.25	1	12	4	0.774143
1	1	0	64	40.96	1	9	2	0.823574
0	0	0	59	34.81	1	6	5	1.01624
1	1	1	20	4	0	6	5	0.881498
0	0	0	70	49	1	0	2	1.2698
0	0	1	51	26.01	1	0	3	1.18707
0	0	0	53	28.09	1	0	4	1.2698
0	0	1	61	37.21	1	6	4	1.04312
1	1	0	50	25	1	0	5	0.739794
1	1	1	49	24.01	1	6	3	0.787187
1	1	0	30	9	1	15	2	0.765435
1	1	0	78	60.84	1	6	2	0.844893
1	1	0	51	26.01	1	6	3	0.774143
0	1	0	50	25	0	15	1	0.774143
0	0	0	46	21.16	0	6	4	1.00906
1	1	0	56	31.36	1	6	3	0.754416
1	1	1	50	25	0	0	4	0.805689
0	0	0	49	24.01	1	6	5	1.03591
0	0	0	49	24.01	1	9	3	1.37313
0	0	1	70	49	1	6	5	1.18092
0	0	1	50	25	1	0	6	1.10368
1	1	1	68	46.24	1	6	2	0.803764
1	1	0	68	46.24	1	0	2	0.833822
0	0	0	47	22.09	0	6	2	1.10111
1	1	1	22	4.84	0	12	5	0.761052
0	0	0	20	4	0	9	6	0.910097
1	1	0	54	29.16	1	6	3	0.763446
0	1	0	77	59.29	0	6	1	1.09027
1	1	0	72	51.84	1	6	2	0.763446
0	1	1	61	37.21	0	0	1	1.01455
1	1	1	57	32.49	1	9	4	0.772637
1	1	1	27	7.29	1	0	5	0.749683
1	1	0	71	50.41	1	0	2	0.877385
0	1	0	64	40.96	0	6	1	1.12055
1	1	1	62	38.44	1	9	2	0.811493
1	1	1	55	30.25	1	9	2	0.869267
1	1	0	22	4.84	0	15	5	0.746627
0	0	1	50	25	1	6	5	1.01366
1	1	1	50	25	1	6	3	0.774178
1	1	1	76	57.76	1	9	2	0.859587
1	1	1	63	39.69	1	6	2	0.792503
1	1	1	32	10.24	1	15	7	0.746627
1	1	1	54	29.16	1	0	5	0.696505
1	1	1	42	17.64	1	9	3	0.772981
1	1	1	70	49	1	12	2	0.855947
0	0	0	50	25	1	9	3	1.04672
0	0	1	53	28.09	1	6	2	1.04831
1	1	1	47	22.09	1	9	3	0.826194
0	0	1	63	39.69	1	6	2	1.2698
1	1	1	65	42.25	1	6	2	0.826194
1	1	1	47	22.09	1	6	5	0.86002
1	1	1	39	15.21	1	9	6	0.739155
0	0	1	37	13.69	1	6	4	1.09691
0	1	1	63	39.69	0	6	1	0.774143
1	1	1	61	37.21	1	9	4	0.86002
0	0	1	50	25	1	6	3	1.12824
0	0	1	50	25	0	0	1	1.12824
0	0	1	48	23.04	1	6	2	1.09596
0	0	1	25	6.25	0	15	6	1.02653
1	1	1	50	25	1	9	2	1.03329
0	0	1	58	33.64	1	6	6	1.18092
1	1	1	55	30.25	1	6	2	0.86002
0	0	1	67	44.89	1	0	3	1.18092
0	0	1	30	9	1	9	4	1.08417
0	0	1	53	28.09	1	6	4	1.1549
0	0	1	21	4.41	0	9	1	1.1549
0	0	1	50	25	0	12	3	1.04567
0	0	1	56	31.36	1	6	2	1.13447
1	1	1	48	23.04	0	0	3	0.826194
1	1	1	65	42.25	1	6	6	0.772752
0	0	1	42	17.64	1	6	2	1.01584
1	1	1	68	46.24	1	6	2	0.86002
0	1	1	55	30.25	1	9	1	0.86002
0	0	1	65	42.25	1	0	2	1.18092
0	0	1	47	22.09	1	9	3	0.990465
0	0	1	36	12.96	1	9	6	1
0	0	1	50	25	1	9	5	1.04831
0	0	1	65	42.25	1	0	4	1.25198
1	1	1	62	38.44	1	0	3	0.818745
1	1	1	50	25	1	9	7	0.759708
0	0	1	24	5.76	0	15	3	1.08909
1	1	1	46	21.16	1	6	4	0.739794
1	1	1	52	27.04	1	9	6	0.924743
1	1	1	67	44.89	1	6	6	0.86002
0	1	1	63	39.69	0	12	1	0.781628
0	0	1	50	25	0	0	2	1.21625
0	1	1	55	30.25	0	9	1	0.86002
1	1	0	31	9.61	1	9	5	0.86002
1	1	0	34	11.56	1	9	3	0.86002
0	1	1	42	17.64	0	9	1	0.840737
1	1	0	35	12.25	1	9	2	0.809721
0	0	0	62	38.44	1	0	2	1.1549
0	0	1	50	25	1	9	5	1.00915
1	1	1	61	37.21	1	6	2	0.86002
1	1	1	30	9	1	15	5	0.787187
0	0	1	64	40.96	1	6	2	1.2698
0	0	1	50	25	1	0	2	1.18092
0	0	1	81	65.61	0	6	1	1.41931
0	0	0	83	68.89	1	6	2	0.995846
1	1	1	28	7.84	1	9	5	0.74199
1	1	1	63	39.69	1	6	2	0.924743
1	1	1	37	13.69	1	9	4	0.755258
0	1	1	65	42.25	0	0	1	1
1	1	1	45	20.25	1	9	2	0.774143
1	1	1	63	39.69	1	12	2	0.806872
0	0	0	50	25	1	6	5	1.01584
0	0	0	52	27.04	1	6	4	1.0075
0	0	1	42	17.64	1	6	5	1.10368
0	0	1	47	22.09	1	6	2	1.13447
1	1	0	74	54.76	1	0	2	1.37051
0	0	0	72	51.84	1	15	2	1.00718
0	0	1	64	40.96	1	9	6	1.02296
0	0	0	50	25	1	6	3	5.07918
1	1	0	72	51.84	1	6	3	0.902182
0	0	0	72	51.84	1	0	5	1.08091
1	1	0	80	64	1	6	2	0.761523
0	0	0	50	25	0	0	2	1.53867
0	0	0	59	34.81	1	9	3	1.07992
1	1	0	49	24.01	1	6	2	0.746627
0	0	1	70	49	1	6	5	1.13447
1	1	0	49	24.01	1	6	2	0.787187
0	1	0	74	54.76	0	6	1	0.924743
1	1	0	50	25	1	15	3	0.723311
0	0	0	37	13.69	1	12	5	1.08091
1	1	1	25	6.25	0	12	2	1.06292
1	1	1	49	24.01	1	9	4	0.826194
1	1	1	36	12.96	1	9	4	0.824871
1	1	1	69	47.61	0	6	2	0.885749
1	1	1	28	7.84	0	16	3	0.893307
1	1	1	51	26.01	1	9	3	0.86002
0	0	1	46	21.16	1	6	4	1.13447
0	0	1	67	44.89	1	0	5	1.65543
1	1	1	40	16	1	9	4	0.86002
1	1	1	67	44.89	1	9	3	0.979042
0	0	1	52	27.04	0	9	2	1.16449
1	1	1	55	30.25	1	15	3	0.787187
1	1	1	49	24.01	1	9	2	0.826194
1	1	0	25	6.25	1	12	3	0.885749
1	1	0	50	25	1	9	4	0.86002
0	0	1	50	25	0	0	5	1.07383
0	0	1	50	25	0	0	3	1.13447
1	1	0	46	21.16	1	9	4	0.826194
1	1	0	52	27.04	1	9	2	0.86002
0	0	0	54	29.16	1	9	2	1.17798
1	1	1	50	25	1	6	3	0.787187
1	1	0	50	25	0	16	4	0.777769
0	0	0	77	59.29	0	0	6	1.34384
0	0	0	46	21.16	1	6	5	1.21625
1	1	0	58	33.64	0	9	2	0.851822
0	0	0	70	49	1	9	4	1.12454
0	0	1	43	18.49	1	9	4	1.27401
1	1	1	54	29.16	1	6	4	1.28148
0	0	1	54	29.16	1	6	3	1.14015
0	0	1	50	25	1	6	2	1.13447
0	0	1	28	7.84	1	16	1	1.13447
0	0	1	50	25	0	16	1	1.13447
1	1	1	50	25	1	12	5	0.885749
1	1	1	55	30.25	1	9	3	0.826194
1	1	1	56	31.36	1	9	3	0.86002
0	0	0	57	32.49	1	9	5	1.04831
0	0	0	32	10.24	1	9	2	1.04831
0	0	1	50	25	0	6	2	1.34436
0	1	1	64	40.96	0	0	1	0.961996
1	1	1	61	37.21	1	12	2	1.15444
1	1	1	63	39.69	0	12	6	0.915271
1	1	1	53	28.09	1	6	2	0.906792
1	1	1	50	25	1	9	4	0.748632
1	1	1	63	39.69	1	0	2	0.855885
0	0	1	63	39.69	1	0	6	1.11776
0	0	1	67	44.89	1	0	2	1.14212
0	0	1	50	25	1	9	5	1.06281
1	1	1	61	37.21	1	9	4	0.780444
0	0	0	74	54.76	1	9	2	1.29294
1	1	1	29	8.41	1	9	5	0.714626
0	0	1	62	38.44	1	12	3	1.17513
1	1	1	33	10.89	0	6	4	0.786106
1	1	1	45	20.25	1	9	5	0.794928
0	0	1	71	50.41	1	0	2	1.31034
0	0	1	40	16	1	9	4	1.11776
1	1	1	62	38.44	0	6	2	0.787187
1	1	1	34	11.56	1	9	3	0.787187
1	1	1	56	31.36	0	0	2	0.906792
1	1	1	66	43.56	1	6	2	0.874368
0	0	1	15	2.25	0	9	3	1.10136
0	0	1	55	30.25	0	0	2	1.2698
1	1	1	38	14.44	1	9	3	0.753587
0	1	0	77	59.29	0	9	1	0.952027
1	1	0	55	30.25	0	6	3	0.803764
1	1	1	56	31.36	1	0	3	0.826194
1	1	1	50	25	0	0	5	0.817163
0	0	1	59	34.81	1	0	3	1.0902
0	0	1	30	9	1	6	3	1.08091
1	1	1	41	16.81	1	9	2	0.796599
1	1	1	46	21.16	1	9	2	0.774143
1	1	1	56	31.36	1	6	2	0.879844
1	1	1	45	20.25	1	6	3	0.774143
1	1	1	50	25	0	0	2	0.961996
1	1	1	33	10.89	1	6	6	0.763446
1	1	1	24	5.76	1	9	6	0.803764
1	1	1	48	23.04	1	9	4	0.763446
1	1	1	50	25	1	9	2	0.924743
1	1	1	61	37.21	1	0	2	0.809721
1	1	1	22	4.84	0	15	3	0.834725
1	1	1	49	24.01	1	6	2	0.787187
1	1	1	50	25	1	0	2	0.967108
1	1	1	44	19.36	1	6	4	0.787187
1	1	1	28	7.84	1	6	5	0.763446
0	0	1	61	37.21	1	0	5	0.984592
1	1	1	50	25	0	6	2	0.906792
1	1	1	52	27.04	1	0	2	0.826194
1	1	1	38	14.44	1	9	5	0.795758
1	1	1	64	40.96	1	0	2	0.83176
1	1	1	49	24.01	1	9	5	0.728261
0	0	1	44	19.36	1	9	5	1.09132
1	1	0	63	39.69	1	0	5	0.763446
1	1	1	60	36	1	9	2	0.906792
1	1	1	66	43.56	1	0	2	0.86002
0	0	1	50	25	0	0	2	1.32095
0	0	1	65	42.25	1	0	2	1.34436
1	1	1	35	12.25	1	9	5	0.869267
0	0	1	82	67.24	1	6	2	1.37313
0	0	1	43	18.49	0	6	4	1.10783
1	1	0	52	27.04	1	0	3	0.739794
1	1	0	49	24.01	1	6	3	0.815825
0	0	1	54	29.16	1	6	2	1.12102
1	1	0	58	33.64	1	9	2	0.826194
0	0	0	45	20.25	1	6	3	1.09384
0	0	0	50	25	1	6	3	1.20209
1	1	0	63	39.69	1	9	2	0.862673
0	1	0	64	40.96	1	0	1	0.862673
1	1	0	28	7.84	0	15	3	0.924743
1	1	0	47	22.09	0	9	3	0.848052
1	1	0	26	6.76	1	15	2	0.848052
1	1	0	25	6.25	0	16	4	0.714054
1	1	1	64	40.96	1	9	2	1.05367
0	0	0	50	25	0	0	3	5.07918
0	0	1	49	24.01	1	9	2	1.18092
1	1	0	26	6.76	1	9	6	0.924743
0	0	1	41	16.81	1	9	3	1.13899
0	0	0	50	25	1	0	2	5.07918
0	0	0	60	36	1	6	2	5.07918
0	0	1	48	23.04	1	9	4	1.08091
0	0	1	47	22.09	1	9	3	1.2698
0	0	0	65	42.25	1	0	5	1.08091
0	0	0	54	29.16	1	6	2	1.2698
1	1	0	50	25	1	12	3	0.774143
1	1	1	64	40.96	1	0	2	1.25209
0	0	1	43	18.49	0	9	2	1.36995
0	0	1	45	20.25	1	9	4	1.10368
0	0	1	31	9.61	1	0	6	1.15957
0	0	1	47	22.09	0	0	1	1.2698
1	1	1	50	25	1	9	4	0.785183
1	1	1	38	14.44	1	9	3	0.851822
1	1	1	43	18.49	1	9	2	0.82422
0	0	1	37	13.69	1	9	5	1.08091
1	1	1	40	16	1	9	4	0.86002
0	0	1	21	4.41	0	15	3	1.18092
1	1	1	22	4.84	0	12	3	0.826194
1	1	0	50	25	1	9	3	0.826194
1	1	0	50	25	1	9	2	0.826194
1	1	1	32	10.24	0	9	4	0.960458
1	1	1	46	21.16	0	12	3	0.721445
0	1	1	62	38.44	0	0	1	0.935443
0	0	1	63	39.69	1	6	2	1.3551
1	1	0	58	33.64	1	12	3	0.697783
1	1	1	31	9.61	1	9	5	0.841069
1	1	1	45	20.25	1	9	4	0.808689
1	1	1	35	12.25	1	9	5	0.739794
0	0	1	50	25	0	16	3	1.08091
0	0	1	39	15.21	1	9	7	1.04831
1	1	1	67	44.89	1	0	2	0.906792
0	0	0	42	17.64	1	6	3	1.18092
0	0	1	21	4.41	1	12	4	1.23913
1	1	0	50	25	1	9	2	1
0	0	1	31	9.61	1	9	5	1.17291
1	1	1	65	42.25	1	6	3	0.86002
1	1	1	50	25	1	6	2	0.885749
1	1	1	18	3.24	0	9	3	0.738524
1	1	1	50	25	0	0	5	0.86002
0	0	1	58	33.64	1	9	3	1.18092
0	0	0	78	60.84	1	6	2	1.15957
1	1	0	29	8.41	1	0	3	0.787187
1	1	1	74	54.76	1	6	2	0.986056
0	0	0	22	4.84	0	12	4	1.07148
1	1	1	52	27.04	1	9	3	0.803764
0	0	0	36	12.96	0	9	4	1.06971
1	1	0	50	25	0	0	2	0.758754
1	1	0	53	28.09	1	9	6	0.80008
1	1	1	50	25	1	9	4	0.729841
1	1	1	49	24.01	1	0	2	0.748101
1	1	1	63	39.69	1	0	3	0.89913
0	0	1	37	13.69	1	9	6	1.08091
0	1	1	76	57.76	0	9	1	0.961996
0	0	1	51	26.01	1	6	3	1.1549
0	0	1	58	33.64	1	6	3	1.12408
1	1	1	59	34.81	1	9	2	0.803764
0	0	1	48	23.04	1	6	3	1.063
1	1	1	38	14.44	1	9	4	0.787187
1	1	0	65	42.25	1	6	2	0.841069
1	1	1	50	25	0	0	3	0.826194
1	1	1	19	3.61	0	9	3	0.754416
1	1	1	53	28.09	1	0	2	0.879844
1	1	1	53	28.09	1	6	2	0.790705
0	1	1	50	25	0	9	1	0.790705
1	1	0	54	29.16	1	9	4	0.760585
1	1	0	39	15.21	1	9	3	0.762457
1	1	0	56	31.36	1	9	2	0.786464
1	1	0	51	26.01	1	12	3	0.859156
1	1	1	70	49	1	6	2	0.798665
1	1	1	39	15.21	1	9	4	0.787187
1	1	1	64	40.96	1	0	2	0.826194
0	0	0	53	28.09	1	6	4	1.09501
0	0	1	49	24.01	1	9	3	1.09154
0	0	1	49	24.01	1	6	3	1.10368
0	0	1	24	5.76	0	15	1	1.10368
1	1	1	65	42.25	1	6	2	0.935615
0	0	0	50	25	1	9	4	1.08543
1	1	1	64	40.96	1	6	2	0.746337
1	1	0	54	29.16	1	9	2	0.784344
1	1	1	46	21.16	1	6	3	0.774143
1	1	1	52	27.04	1	6	2	0.764233
1	1	0	40	16	1	12	4	0.774143
0	0	0	36	12.96	1	9	6	1.00829
0	0	0	35	12.25	1	6	6	1.04831
0	0	1	50	25	1	6	4	1.02085
1	1	1	45	20.25	1	9	4	0.754416
1	1	0	42	17.64	1	15	3	0.774143
1	1	1	53	28.09	1	9	5	0.719617
0	0	0	66	43.56	1	0	6	1.2698
0	0	0	61	37.21	1	12	2	1.1549
0	0	1	50	25	0	6	3	1.24188
0	0	0	54	29.16	1	6	5	1.13447
0	0	0	28	7.84	1	12	5	1.04831
0	0	1	50	25	1	0	4	1.10368
1	1	1	64	40.96	1	6	2	0.814022
1	1	1	53	28.09	1	6	2	0.828642
1	1	1	50	25	1	0	3	0.810982
0	0	1	30	9	1	9	5	1.1549
1	1	1	43	18.49	1	9	4	0.787187
1	1	1	63	39.69	1	0	3	0.924743
1	1	1	68	46.24	1	0	5	0.826194
0	1	1	52	27.04	0	9	1	0.81853
0	1	1	53	28.09	0	0	1	0.773862
1	1	1	38	14.44	1	9	5	0.753768
1	1	1	48	23.04	1	0	4	0.826194
1	1	0	28	7.84	1	9	5	0.746627
1	1	0	70	49	1	0	2	1
0	0	1	53	28.09	1	6	2	1.08091
1	1	0	24	5.76	1	6	2	0.826194
1	1	1	27	7.29	0	13	3	0.7557
1	1	1	35	12.25	1	9	3	0.814022
1	1	1	56	31.36	1	6	2	0.953143
0	0	1	70	49	1	6	5	1.07405
0	0	1	52	27.04	1	6	3	1.09961
1	1	1	72	51.84	1	0	2	0.941598
1	1	1	57	32.49	1	12	3	0.826194
0	0	1	44	19.36	1	6	4	1.08091
1	1	1	39	15.21	1	6	2	0.826194
1	1	0	52	27.04	1	0	4	0.803764
1	1	1	50	25	1	9	5	0.826194
1	1	1	63	39.69	0	0	5	0.736105
0	1	0	78	60.84	0	6	1	0.912892
0	0	1	38	14.44	1	9	3	1.10368
1	1	0	64	40.96	1	0	2	0.99814
0	0	0	32	10.24	1	16	6	0.992557
0	0	1	43	18.49	1	0	5	1.12718
1	1	1	50	25	1	0	6	0.86002
1	1	0	55	30.25	1	6	4	0.803764
0	0	1	54	29.16	1	12	7	0.985729
1	1	0	52	27.04	1	0	5	0.718787
1	1	1	51	26.01	0	0	2	0.802636
0	0	1	50	25	0	0	5	1.25128
0	0	1	46	21.16	1	9	8	1.03719
0	0	1	24	5.76	1	9	5	1.04794
1	1	1	50	25	1	0	2	0.86002
0	0	1	62	38.44	1	0	4	1.2698
0	0	1	24	5.76	0	15	4	1.21625
0	0	1	23	5.29	0	9	5	1.05837
0	0	1	48	23.04	1	0	3	1.12343
0	0	1	31	9.61	0	0	2	1.41008
0	0	1	71	50.41	1	9	2	1.31271
0	0	1	49	24.01	1	0	2	1.18092
0	0	1	50	25	0	15	1	1.18092
0	0	0	66	43.56	1	6	8	1.46074
0	1	1	49	24.01	0	6	1	0.885749
0	0	1	32	10.24	0	12	3	1.17513
1	1	1	56	31.36	1	6	2	0.885749
1	1	1	63	39.69	1	9	3	1.0269
1	1	1	50	25	1	15	2	1.0269
0	0	0	50	25	0	0	4	1.25927
1	1	1	66	43.56	1	9	2	1.01524
0	0	0	50	25	0	16	3	1.10368
0	1	1	48	23.04	0	9	1	0.764881
0	1	1	50	25	0	0	1	0.764881
1	1	0	28	7.84	1	9	6	0.790169
1	1	1	36	12.96	0	9	5	0.718787
1	1	0	66	43.56	1	9	2	1
0	0	0	59	34.81	1	0	2	1.18092
0	0	0	50	25	1	9	3	1.18092
1	1	0	36	12.96	0	9	4	0.787187
1	1	1	59	34.81	1	12	2	0.787187
1	1	1	50	25	1	0	4	0.764931
0	1	1	34	11.56	1	16	1	0.764931
0	0	0	46	21.16	1	0	4	1.13447
0	0	0	69	47.61	1	9	2	1.13447
0	0	1	54	29.16	1	0	2	1.2698
0	0	1	50	25	0	0	1	1.2698
0	0	0	65	42.25	1	0	4	1.063
1	1	1	74	54.76	1	9	2	0.844473
0	0	0	50	25	0	0	2	1.41008
0	0	1	56	31.36	0	0	2	1.10187
1	1	1	50	25	0	0	2	0.945106
1	1	1	69	47.61	1	0	2	0.89913
0	0	1	54	29.16	1	6	3	1.0974
0	0	0	54	29.16	1	12	2	1.07148
0	0	1	50	25	1	9	3	1.09463
0	0	1	20	4	0	15	1	1.09463
1	1	0	59	34.81	1	0	2	0.86002
1	1	0	39	15.21	1	0	2	0.787187
0	0	0	53	28.09	1	9	4	1.13447
0	0	1	56	31.36	1	6	2	1.15957
0	0	1	40	16	1	6	4	1.13447
0	0	1	43	18.49	1	9	3	1.17798
1	1	1	50	25	1	9	5	0.826194
1	1	1	30	9	1	0	3	0.826194
0	0	1	43	18.49	1	6	3	1.18092
0	0	1	18	3.24	0	15	1	1.18092
0	0	1	53	28.09	1	6	5	1.08091
1	1	1	49	24.01	1	6	2	0.844473
1	1	1	25	6.25	1	0	2	0.844473
1	1	1	50	25	0	0	2	0.879844
1	1	1	64	40.96	1	6	2	1.12055
0	0	1	44	19.36	1	0	4	1.11776
0	0	0	64	40.96	1	0	6	1.08091
0	0	0	39	15.21	1	9	2	1.08091
0	0	0	31	9.61	1	9	4	1.08091
0	0	1	34	11.56	1	6	3	1.09154
0	0	1	27	7.29	0	9	3	1.12742
0	0	1	30	9	1	6	3	1.12742
0	0	1	48	23.04	1	0	4	1.18092
1	1	1	65	42.25	1	0	2	0.924743
1	1	1	56	31.36	1	0	3	0.814022
1	1	0	38	14.44	0	9	4	0.879844
1	1	0	50	25	0	6	3	0.841069
1	1	0	40	16	1	9	3	0.820072
1	1	0	50	25	1	9	2	0.742426
1	1	0	50	25	1	0	3	0.818625
1	1	0	49	24.01	1	12	2	0.754416
0	1	0	50	25	0	19	1	0.754416
0	0	1	50	25	0	0	2	1.41008
1	1	0	60	36	1	9	5	0.699057
1	1	0	67	44.89	1	0	2	0.86002
0	0	0	50	25	1	6	7	1.08089
0	0	1	52	27.04	1	6	4	1.01584
1	1	1	43	18.49	1	0	3	0.787187
0	0	0	47	22.09	1	6	3	1.03038
0	0	0	80	64	0	0	1	1.03038
1	1	0	31	9.61	1	9	5	0.759388
0	0	0	54	29.16	1	6	2	1.18707
0	0	0	64	40.96	1	0	2	1.2698
0	0	0	30	9	1	6	5	1.18092
0	0	0	45	20.25	1	6	6	1.07212
1	1	0	34	11.56	1	9	4	0.774143
1	1	0	44	19.36	1	9	4	0.787187
0	1	0	50	25	0	14	1	0.787187
1	1	0	39	15.21	1	9	5	0.814022
1	1	0	39	15.21	1	9	3	0.814022
0	1	0	84	70.56	0	0	1	3.69897
0	0	0	51	26.01	1	9	3	1.17513
0	1	0	76	57.76	0	0	1	3.69897
0	0	1	63	39.69	1	0	5	1.03591
1	1	0	50	25	0	0	2	0.885749
1	1	0	50	25	1	9	3	0.86002
1	1	1	39	15.21	1	12	4	0.754416
1	1	0	26	6.76	1	0	4	0.727081
1	1	0	50	25	0	0	7	0.705501
1	1	0	50	25	0	0	3	0.728261
0	0	1	50	25	1	6	5	1.18092
0	0	0	25	6.25	1	9	3	1.0373
0	0	0	49	24.01	1	6	3	0.997204
1	1	0	28	7.84	1	15	3	0.841069
1	1	0	50	25	1	9	2	0.714626
1	1	0	30	9	1	12	3	0.814022
1	1	0	50	25	0	0	6	0.739794
0	0	1	56	31.36	1	9	2	1.24515
1	1	1	64	40.96	1	6	2	0.86524
1	1	0	54	29.16	1	15	2	0.754416
1	1	1	50	25	1	15	2	0.739794
1	1	1	51	26.01	1	0	3	0.885749
1	1	1	33	10.89	1	9	3	0.718787
0	1	0	62	38.44	1	12	1	0.83176
1	1	1	31	9.61	0	15	5	0.803916
1	1	0	68	46.24	1	9	2	0.774143
1	1	0	45	20.25	1	6	2	0.803764
1	1	0	55	30.25	1	12	4	0.826194
1	1	1	67	44.89	1	9	2	0.879844
1	1	1	39	15.21	1	9	5	0.850062
0	1	0	50	25	0	15	1	0.86002
1	1	0	60	36	1	12	2	0.754416
1	1	0	50	25	0	16	3	0.787187
1	1	1	28	7.84	1	16	4	0.697783
0	0	1	68	46.24	1	9	2	1.063
0	0	1	78	60.84	1	0	4	1.05532
1	1	1	50	25	1	0	2	0.806574
0	0	1	50	25	1	6	2	1.37313
1	1	1	69	47.61	1	0	2	0.942586
0	0	0	56	31.36	1	6	2	1.14413
0	1	0	66	43.56	0	9	1	0.76625
1	1	0	49	24.01	1	9	4	0.833822
0	0	0	48	23.04	0	6	5	1.02522
0	0	1	36	12.96	1	9	5	1.03354
0	0	1	64	40.96	1	0	5	1.02482
0	0	0	52	27.04	1	6	5	0.966492
0	0	0	49	24.01	1	0	3	1.2698
1	1	1	41	16.81	0	9	3	0.715432
1	1	1	63	39.69	1	0	3	0.941353
1	1	1	56	31.36	0	6	2	0.924743
1	1	1	65	42.25	1	0	2	0.924743
0	0	0	67	44.89	1	0	3	1.2698
0	0	1	30	9	1	6	3	1.13447
1	1	1	50	25	1	9	3	0.882739
1	1	1	66	43.56	1	0	2	0.979042
0	0	1	50	25	0	9	4	1.10368
1	1	0	24	5.76	0	12	4	0.763446
1	1	1	60	36	0	9	2	0.89215
1	1	1	50	25	1	6	3	0.774143
0	0	1	41	16.81	1	6	5	1.13447
1	1	0	48	23.04	1	0	2	0.841069
0	1	1	82	67.24	0	0	1	1.04895
1	1	0	25	6.25	1	9	3	0.816283
0	0	1	40	16	1	0	6	1.10368
1	1	1	49	24.01	1	0	3	0.763446
1	1	1	63	39.69	1	0	2	0.826194
0	1	1	66	43.56	0	6	1	0.736021
1	1	0	62	38.44	1	12	2	0.773617
0	0	0	86	73.96	1	0	3	1.02724
0	1	1	80	64	0	0	1	0.704509
1	1	0	47	22.09	1	9	2	0.718787
0	0	0	73	53.29	1	0	4	1.04725
1	1	0	30	9	1	16	5	0.724942
0	0	0	46	21.16	1	6	3	0.974382
1	1	0	72	51.84	1	6	2	0.711675
1	1	0	60	36	0	12	2	0.778521
0	0	0	50	25	0	0	2	0.99693
0	0	0	61	37.21	1	6	2	1.01513
0	0	0	45	20.25	1	6	4	0.962193
1	1	0	40	16	1	9	3	0.700125
0	0	0	81	65.61	1	0	2	1.00655
0	1	0	75	56.25	0	0	1	0.773675
1	1	0	69	47.61	1	9	2	0.777026
1	1	1	50	25	1	15	4	0.771113
1	1	1	43	18.49	1	12	3	0.763446
1	1	1	69	47.61	1	9	4	0.803764
0	0	1	40	16	0	6	5	1.10368
0	0	1	50	25	0	9	3	1.10368
1	1	1	50	25	0	9	2	0.807472
0	0	1	50	25	1	0	6	1.13447
1	1	1	50	25	1	9	2	0.787187
1	1	1	73	53.29	1	6	2	1.079
0	0	1	50	25	1	6	2	0.966492
1	1	0	45	20.25	1	9	2	0.787187
0	1	0	24	5.76	0	15	1	0.787187
1	1	1	50	25	0	16	3	0.785043
0	1	1	85	72.25	0	0	1	1.0638
1	1	0	37	13.69	1	9	3	0.826194
1	1	0	65	42.25	1	6	2	0.826194
1	1	0	61	37.21	1	6	2	0.787187
1	1	1	63	39.69	0	0	2	0.924743
0	0	1	26	6.76	0	16	5	1.07387
1	1	1	45	20.25	1	9	3	0.86002
1	1	1	50	25	1	9	2	0.787187
1	1	1	50	25	1	9	3	0.750777
1	1	1	59	34.81	1	9	2	0.803764
0	0	1	30	9	1	9	6	1.12408
0	0	1	26	6.76	1	0	10	0.940948
0	0	0	44	19.36	1	0	6	1.08091
0	0	1	33	10.89	1	12	6	0.997679
1	1	1	50	25	0	0	5	0.896263
1	1	0	50	25	0	0	3	0.787187
0	0	1	50	25	1	9	3	1.64952
0	0	1	50	25	1	9	10	1.17508
1	1	1	39	15.21	1	6	4	0.924743
1	1	1	57	32.49	1	9	4	0.830896
1	1	0	50	25	1	9	3	0.797451
1	1	0	25	6.25	1	12	3	0.826194
1	1	1	35	12.25	1	15	5	0.790383
0	0	0	50	25	1	6	4	1.08091
1	1	0	27	7.29	0	16	6	0.774143
1	1	0	50	25	1	0	10	0.754416
0	0	0	50	25	1	0	4	1.09154
0	0	0	64	40.96	1	9	4	1.09154
0	0	1	50	25	0	0	5	1.17541
0	0	1	24	5.76	1	0	6	0.995076
1	1	0	31	9.61	1	0	2	0.729521
1	1	1	37	13.69	1	9	4	0.816283
1	1	0	58	33.64	1	6	10	0.924743
1	1	1	45	20.25	1	9	6	0.803764
1	1	1	50	25	1	0	5	0.723311
0	0	0	29	8.41	1	6	10	1.1133
0	0	0	50	25	1	0	10	0.952687
1	1	0	29	8.41	1	6	4	0.728261
1	1	0	21	4.41	1	9	7	0.826194
1	1	1	50	25	0	0	7	0.795275
1	1	1	50	25	1	12	7	0.732372
1	1	1	30	9	1	6	4	0.803764
1	1	1	64	40.96	1	12	6	0.718218
1	1	0	50	25	0	0	3	0.774143
0	0	1	50	25	1	9	5	1.10368
0	0	1	50	25	1	9	4	1.10368
1	1	1	62	38.44	0	0	3	0.86002
1	1	0	24	5.76	1	9	4	0.787187
1	1	0	50	25	0	0	3	1.84949
1	1	0	31	9.61	1	9	2	0.774143
1	1	0	55	30.25	0	0	4	0.774143
1	1	0	50	25	1	9	3	3.69897
1	1	0	50	25	1	9	4	0.700531
1	1	0	33	10.89	1	6	4	0.790169
1	1	0	29	8.41	1	12	6	0.787187
1	1	0	30	9	1	12	6	0.743791
1	1	1	30	9	1	0	7	0.754416
1	1	1	33	10.89	1	9	5	0.790937
0	0	1	50	25	1	6	5	1.13088
0	0	1	50	25	1	9	5	1.01522
1	1	1	61	37.21	0	0	5	0.750387
0	0	0	50	25	0	0	5	1.15044
1	1	0	22	4.84	1	0	5	0.777396
1	1	0	26	6.76	1	0	3	0.750387
0	0	1	33	10.89	1	9	5	1.08061
1	1	1	50	25	0	0	5	0.821054
1	1	0	50	25	1	9	3	0.714626
1	1	0	50	25	1	9	2	0.763446
1	1	0	30	9	1	12	3	0.714626
1	1	0	39	15.21	1	9	3	0.722143
1	1	0	69	47.61	1	6	2	0.787187
1	1	1	56	31.36	1	0	2	0.671911
1	1	0	73	53.29	1	6	2	0.793301
0	1	0	88	77.44	0	0	1	3.69897
1	1	0	58	33.64	1	9	2	0.826194
0	0	0	29	8.41	0	15	3	1.063
1	1	0	72	51.84	1	0	2	0.757682
1	1	0	63	39.69	1	6	2	0.771842
0	0	0	41	16.81	1	9	5	1.00517
1	1	0	63	39.69	1	6	2	0.803764
1	1	0	75	56.25	1	6	2	0.811836
0	0	0	33	10.89	1	15	6	0.91853
1	1	1	50	25	1	9	2	0.697356
1	1	0	38	14.44	1	9	6	0.710777
0	1	0	71	50.41	0	6	1	0.821054
0	0	0	23	5.29	0	15	5	0.938862
0	0	0	39	15.21	1	15	4	0.940948
0	0	0	46	21.16	1	9	7	0.95815
0	0	0	50	25	0	9	3	0.98114
0	0	0	50	25	1	15	5	0.937988
0	0	0	42	17.64	1	9	5	0.963455
0	0	0	50	25	1	15	5	0.946639
0	0	1	50	25	1	9	5	1.03591
1	1	0	60	36	1	9	2	0.715189
1	1	1	68	46.24	1	0	3	0.766972
0	1	1	79	62.41	0	6	1	0.87332
1	1	0	42	17.64	1	9	4	0.742157
0	0	0	45	20.25	1	6	3	1.11476
0	0	0	70	49	1	6	5	0.940948
0	0	0	53	28.09	1	0	4	1.02622
0	0	0	72	51.84	0	0	3	1.0341
0	1	0	50	25	0	0	1	0.869218
0	0	0	68	46.24	1	6	2	1.04187
1	1	0	71	50.41	1	6	2	0.778521
1	1	0	61	37.21	1	9	3	0.705501
1	1	0	32	10.24	1	15	4	0.699529
1	1	0	48	23.04	1	9	5	0.682267
0	0	0	64	40.96	1	6	5	0.981277
0	0	0	49	24.01	1	6	5	1.01584
0	0	0	52	27.04	0	6	2	1.06971
1	1	1	59	34.81	1	9	3	0.754416
1	1	0	72	51.84	1	9	2	0.826194
1	1	0	73	53.29	1	9	5	0.726375
1	1	0	74	54.76	1	9	3	0.927811
1	1	1	50	25	1	6	2	0.771505
1	1	1	50	25	1	9	5	0.761495
1	1	1	71	50.41	0	0	2	0.862224
1	1	0	55	30.25	1	6	2	0.85746
0	1	0	50	25	0	0	1	0.85746
0	1	1	48	23.04	1	12	1	0.799439
0	1	0	64	40.96	1	0	1	0.765435
1	1	0	35	12.25	1	9	4	0.765435
1	1	1	72	51.84	0	0	2	0.965156
1	1	0	54	29.16	1	6	2	0.774143
1	1	0	41	16.81	1	9	5	0.714626
1	1	1	70	49	1	0	6	0.894111
1	1	1	22	4.84	0	12	3	0.758064
1	1	1	24	5.76	1	15	2	0.758064
1	1	1	43	18.49	1	16	5	0.730921
1	1	1	50	25	0	0	6	0.766352
1	1	1	45	20.25	1	6	6	0.766817
1	1	1	28	7.84	1	9	7	0.714038
1	1	1	22	4.84	0	0	6	0.848052
1	1	0	50	25	0	16	3	0.685256
1	1	0	50	25	1	12	3	0.660287
0	1	0	50	25	0	0	1	1.11621
1	1	1	49	24.01	1	12	3	0.760214
1	1	1	59	34.81	1	6	6	0.775989
1	1	1	50	25	0	0	3	0.885749
1	1	1	62	38.44	1	6	2	0.853785
1	1	1	50	25	0	0	6	0.763544
1	1	1	50	25	0	0	7	0.793591
1	1	1	74	54.76	1	6	3	0.729628
1	1	0	50	25	0	0	4	1.00482
0	0	1	63	39.69	1	9	7	0.982887
1	1	0	50	25	0	0	3	0.882739
0	0	1	62	38.44	1	0	2	1.0974
0	0	1	50	25	0	9	4	1.02532
0	0	0	49	24.01	1	6	5	1.01584
1	1	1	70	49	1	6	2	0.758215
1	1	0	47	22.09	1	9	3	0.714626
0	0	1	42	17.64	1	9	3	0.998729
1	1	0	44	19.36	1	9	3	0.692377
1	1	1	25	6.25	0	12	3	0.722467
0	0	0	45	20.25	1	15	5	0.956752
1	1	0	74	54.76	1	12	2	0.738649
1	1	0	30	9	1	15	5	0.700425
1	1	0	45	20.25	1	12	3	0.808078
1	1	1	72	51.84	1	0	2	0.750169
0	1	0	22	4.84	0	16	1	0.808078
1	1	1	37	13.69	1	15	5	0.695658
1	1	1	31	9.61	1	12	5	0.626066
1	1	1	26	6.76	1	16	5	0.724072
1	1	1	29	8.41	1	15	6	0.702097
0	0	1	38	14.44	1	12	6	1.01273
0	0	0	40	16	1	9	4	0.969208
1	1	0	42	17.64	0	9	3	0.796599
1	1	0	31	9.61	0	12	3	0.727745
1	1	0	35	12.25	1	9	5	0.714626
1	1	1	55	30.25	1	9	5	0.700215
1	1	0	64	40.96	1	0	2	0.805689
1	1	0	52	27.04	1	12	3	0.710777
1	1	0	73	53.29	1	0	2	0.710777
1	1	1	24	5.76	0	12	4	0.714626
1	1	1	55	30.25	1	9	3	0.780574
1	1	0	51	26.01	1	0	3	0.713021
1	1	0	63	39.69	1	6	2	0.814468
1	1	1	66	43.56	1	0	2	0.803764
1	1	0	43	18.49	1	9	5	0.742561
1	1	0	50	25	1	9	4	0.720103
1	1	0	47	22.09	1	12	4	0.774143
1	1	0	55	30.25	1	9	5	0.68519
1	1	0	50	25	1	6	4	0.728261
1	1	0	41	16.81	1	9	5	0.759115
1	1	0	51	26.01	1	9	6	0.655444
1	1	0	33	10.89	1	16	5	0.708423
1	1	0	52	27.04	1	6	2	0.762476
1	1	0	33	10.89	1	12	8	0.636337
0	0	0	86	73.96	1	0	2	1.34436
1	1	0	49	24.01	1	9	4	0.728261
0	0	0	47	22.09	1	6	3	1.04567
1	1	1	81	65.61	1	6	2	0.953143
1	1	0	71	50.41	1	6	3	0.742426
1	1	0	50	25	0	0	2	0.763446
1	1	0	23	5.29	1	12	4	0.742426
1	1	0	38	14.44	1	9	5	0.73649
1	1	0	39	15.21	1	12	6	0.706174
0	0	0	62	38.44	0	9	2	1.11476
1	1	0	36	12.96	1	15	4	0.697783
1	1	1	50	25	1	6	2	0.803764
0	0	1	32	10.24	1	9	7	0.94497
1	1	0	50	25	1	9	2	0.774143
1	1	1	71	50.41	1	6	2	0.699915
1	1	1	49	24.01	1	9	4	0.820072
0	0	1	56	31.36	1	9	2	1.0742
0	0	1	27	7.29	0	16	1	1.0742
1	1	0	59	34.81	1	0	2	0.794928
1	1	1	50	25	1	6	2	0.750699
1	1	1	50	25	0	15	4	0.750699
0	0	1	30	9	0	9	3	1.10053
1	1	0	65	42.25	1	0	2	0.803764
1	1	1	57	32.49	0	12	2	0.806852
1	1	0	36	12.96	1	0	6	0.755258
1	1	0	53	28.09	1	9	3	0.822935
0	1	1	70	49	0	0	1	0.94526
1	1	0	27	7.29	0	16	4	0.714626
1	1	0	49	24.01	1	9	2	0.754416
0	0	0	50	25	1	6	5	0.981277
0	0	0	53	28.09	1	9	3	1.11685
1	1	1	43	18.49	1	9	3	0.762959
1	1	1	50	25	0	0	3	0.822884
1	1	0	71	50.41	0	0	4	0.739794
0	0	0	69	47.61	0	0	4	1.08091
1	1	0	82	67.24	0	6	2	0.808689
0	0	0	53	28.09	1	0	2	1.08501
0	0	0	50	25	0	0	1	1.08501
1	1	0	59	34.81	1	9	2	0.710777
1	1	1	27	7.29	0	16	3	0.660224
1	1	0	52	27.04	1	9	6	0.731524
1	1	0	27	7.29	0	16	4	0.680199
1	1	0	44	19.36	1	16	6	0.787187
0	0	1	54	29.16	0	0	1	1.15044
0	0	1	24	5.76	0	16	1	1.15044
1	1	0	57	32.49	1	9	2	0.757859
0	0	0	55	30.25	1	12	2	1.063
1	1	0	50	25	1	0	2	0.714626
1	1	1	50	25	1	6	4	0.760103
1	1	1	50	25	1	9	2	0.826194
1	1	1	53	28.09	1	9	4	0.763446
1	1	0	32	10.24	1	15	5	0.659147
0	0	0	43	18.49	1	9	6	1.00228
0	0	0	50	25	1	12	2	1.0373
0	0	0	50	25	1	0	3	1.0373
1	1	1	50	25	1	9	2	0.742426
1	1	1	51	26.01	1	9	4	0.777272
1	1	0	78	60.84	1	0	3	0.893974
0	1	1	56	31.36	0	0	1	0.814022
1	1	1	65	42.25	1	0	2	0.809871
0	0	0	49	24.01	1	6	2	0.944045
0	0	0	47	22.09	1	9	2	1.04831
0	0	0	27	7.29	1	16	2	0.980812
0	0	0	41	16.81	1	9	6	0.940767
1	1	1	50	25	1	15	4	0.675349
1	1	0	34	11.56	1	15	5	0.682286
0	0	0	49	24.01	1	0	3	1.01409
1	1	1	39	15.21	1	9	5	0.746192
1	1	0	67	44.89	1	6	6	0.728261
0	0	0	50	25	1	12	8	0.940948
0	0	1	50	25	1	0	5	0.998904
1	1	0	51	26.01	1	0	5	0.675349
1	1	0	41	16.81	1	15	4	0.727745
1	1	0	49	24.01	1	9	4	0.667194
0	0	0	26	6.76	1	9	5	1
1	1	1	50	25	1	15	6	0.691868
0	0	0	36	12.96	1	12	6	0.916147
1	1	0	53	28.09	1	6	3	0.774143
0	0	1	50	25	0	0	3	1.29758
1	1	0	46	21.16	1	6	6	0.732899
0	0	0	33	10.89	1	12	6	0.868964
1	1	1	31	9.61	0	15	3	0.654537
1	1	1	50	25	1	0	6	0.714626
1	1	0	36	12.96	1	9	3	0.739794
0	1	0	50	25	0	0	1	0.86002
1	1	0	45	20.25	1	6	3	0.697783
0	1	0	78	60.84	0	0	1	0.961996
1	1	0	72	51.84	1	0	2	0.841069
1	1	0	39	15.21	1	9	3	0.754416
1	1	1	40	16	1	9	3	0.683016
0	1	1	71	50.41	0	0	1	0.988934
1	1	1	50	25	0	16	3	0.7091
0	0	0	51	26.01	1	0	6	0.999645
0	0	1	47	22.09	1	6	4	1.00441
0	0	1	55	30.25	1	9	10	1.00593
1	1	0	50	25	0	12	4	0.826194
1	1	1	51	26.01	1	0	3	0.86002
0	0	1	41	16.81	1	9	6	1.06252
1	1	0	33	10.89	1	9	3	0.718787
0	0	1	38	14.44	1	0	5	1.01072
1	1	1	47	22.09	1	6	3	0.732302
0	0	1	68	46.24	0	0	1	1.23403
0	0	1	70	49	1	0	2	1.20062
0	0	1	64	40.96	1	0	3	1.11289
0	0	1	61	37.21	1	0	8	1.14212
0	0	1	50	25	0	0	3	1.14212
1	1	1	35	12.25	1	9	6	0.71625
0	1	1	67	44.89	0	0	1	0.961996
0	0	1	50	25	1	12	5	1.04831
0	1	1	67	44.89	0	0	1	0.935443
1	1	0	75	56.25	1	6	2	0.909742
0	0	0	50	25	1	0	2	1.35399
1	1	0	74	54.76	1	0	6	0.696754
0	0	0	50	25	1	0	3	1.25376
0	1	0	66	43.56	1	0	1	0.864497
0	0	0	75	56.25	1	0	2	1.37313
0	0	0	42	17.64	1	6	4	0.940948
0	0	1	48	23.04	1	9	4	1.19362
1	1	0	66	43.56	1	0	2	0.851822
1	1	1	73	53.29	0	0	2	0.915271
1	1	0	72	51.84	1	9	3	0.869267
0	1	0	50	25	0	0	1	0.760585
0	0	0	50	25	1	0	5	1.13447
0	0	0	50	25	1	6	5	1.13447
1	1	0	50	25	0	16	3	0.773967
0	0	1	49	24.01	1	0	6	0.975972
0	0	0	50	25	1	6	3	0.986398
1	1	0	50	25	0	6	2	0.773327
1	1	1	50	25	1	16	3	0.826194
1	1	1	50	25	1	6	2	0.924743
1	1	0	52	27.04	1	9	7	0.723311
0	0	1	66	43.56	1	0	4	1.04187
0	0	1	50	25	1	9	5	0.949047
1	1	1	53	28.09	1	9	4	0.72703
1	1	1	40	16	1	0	3	0.813756
0	0	1	33	10.89	1	12	6	0.95815
1	1	1	50	25	0	0	6	0.774143
0	0	1	50	25	1	0	3	1.13447
0	0	0	50	25	1	12	8	0.906663
0	0	0	28	7.84	1	16	1	0.906663
0	0	1	34	11.56	1	0	6	1.03092
1	1	1	50	25	1	0	2	0.778774
0	0	1	63	39.69	1	6	6	1.13447
0	0	1	50	25	1	6	4	1.08091
1	1	1	63	39.69	1	6	2	0.803764
0	0	1	50	25	1	6	5	1.03017
1	1	0	54	29.16	1	9	2	0.787187
1	1	0	56	31.36	1	9	2	0.763446
1	1	1	50	25	1	0	5	0.826194
0	0	1	50	25	0	0	4	1.08091
1	1	0	46	21.16	1	6	5	0.893497
1	1	1	42	17.64	1	0	4	0.761495
0	0	0	33	10.89	1	9	4	1.03591
0	0	1	50	25	1	12	4	0.974556
1	1	0	51	26.01	1	15	3	0.746627
0	0	1	43	18.49	1	9	5	1.09227
0	0	0	39	15.21	1	16	5	1.01584
1	1	1	59	34.81	1	12	2	0.86002
0	0	0	50	25	1	6	2	1.10904
0	0	1	50	25	1	0	2	1.13338
1	1	0	50	25	0	6	3	0.803764
1	1	0	24	5.76	0	12	3	0.723311
1	1	1	65	42.25	1	6	2	0.852288
1	1	1	50	25	1	6	2	0.764923
1	1	1	50	25	1	9	4	0.697783
0	0	1	28	7.84	1	9	6	1.08091
0	0	1	50	25	0	0	1	1.08091
1	1	1	50	25	1	0	3	0.86002
1	1	1	28	7.84	1	15	5	0.714626
0	1	1	50	25	0	0	1	0.97893
1	1	0	53	28.09	1	6	7	0.73372
0	0	0	40	16	1	6	6	0.971079
1	1	1	50	25	1	9	2	0.86002
1	1	1	50	25	1	9	3	0.86002
0	0	0	33	10.89	1	6	6	1.01584
1	1	0	66	43.56	1	6	2	0.86002
0	0	0	38	14.44	1	6	6	1.02522
1	1	0	31	9.61	1	9	3	0.803764
1	1	0	53	28.09	1	9	5	0.803764
1	1	0	51	26.01	1	6	3	0.718787
0	0	0	42	17.64	1	6	5	0.968336
0	0	0	41	16.81	1	0	6	1.02882
1	1	0	74	54.76	1	0	2	0.851822
1	1	0	50	25	1	0	6	0.616018
1	1	0	61	37.21	1	0	13	0.716665
0	0	1	61	37.21	1	0	5	1.19362
1	1	1	61	37.21	1	6	2	0.844316
0	0	1	50	25	1	6	4	0.981277
0	1	0	62	38.44	1	6	1	0.895562
1	1	1	50	25	1	0	3	0.755063
1	1	1	50	25	1	14	4	0.739794
1	1	1	50	25	1	14	2	0.739794
1	1	1	34	11.56	1	9	2	0.739794
1	1	1	50	25	1	0	4	0.705501
1	1	1	30	9	1	9	4	0.705501
0	0	0	44	19.36	1	6	4	1.04447
1	1	1	71	50.41	1	6	2	0.947703
0	0	0	42	17.64	1	12	4	1.01584
1	1	0	50	25	1	9	7	0.739794
0	0	0	37	13.69	1	9	5	0.981277
1	1	0	45	20.25	1	6	4	0.739794
1	1	1	50	25	0	0	3	0.86002
1	1	0	35	12.25	1	9	5	0.754416
0	0	0	41	16.81	1	0	9	1.08091
0	0	1	69	47.61	1	6	2	1.21625
1	1	0	30	9	1	0	4	0.772752
0	0	1	33	10.89	1	6	5	0.981277
0	0	0	50	25	1	6	4	0.95815
1	1	0	50	25	0	0	4	0.739794
0	0	0	50	25	1	12	5	0.981277
0	0	0	50	25	1	12	5	0.981277
0	1	0	50	25	1	12	1	0.808689
0	0	0	50	25	0	12	7	0.974982
0	0	0	61	37.21	1	0	4	1.10368
1	1	1	56	31.36	1	6	4	0.74825
0	0	0	54	29.16	1	9	2	1.21625
1	1	0	46	21.16	0	9	4	0.82738
1	1	0	77	59.29	1	0	2	0.924743
0	0	1	68	46.24	1	6	3	1.23819
1	1	0	50	25	1	12	5	0.68087
0	0	0	74	54.76	0	0	5	1.11044
0	0	0	50	25	1	0	5	1.12742
1	1	0	55	30.25	0	6	5	0.703859
0	0	0	57	32.49	1	9	2	1.18092
0	0	0	31	9.61	1	15	2	1.18092
1	1	0	56	31.36	1	6	2	0.794928
0	0	1	48	23.04	1	0	3	1.08091
0	0	0	35	12.25	1	6	4	1.01584
1	1	0	64	40.96	1	6	2	0.86002
0	0	0	65	42.25	1	6	2	1.18092
1	1	0	78	60.84	0	0	2	1.0638
1	1	0	28	7.84	0	9	3	0.803764
0	0	0	71	50.41	1	0	7	1.0577
[truncated: 3,755 more rows]

## Sheet: 2016 survey data
vep1	vep2	GTP	Age	Age2_	Male	Year_edu	Fam_size	E_health
1	1	1	30	9	1	6	7	0.823374
0	1	0	50	25	0	0	4	0.919823
1	1	1	51	26.01	1	6	3	0.627858
1	1	0	28	7.84	1	6	5	0.696494
1	1	1	42	17.64	1	0	3	0.639401
1	1	1	73	53.29	1	0	3	0.924743
1	1	0	50	25	0	0	3	0.456427
1	1	0	50	25	0	0	3	0.776642
0	0	0	33	10.89	1	9	3	0.930728
1	1	1	26	6.76	0	12	4	0.707622
1	1	0	50	25	0	0	4	0
1	1	0	25	6.25	1	9	3	0
1	1	0	37	13.69	1	12	5	0.732023
1	1	0	28	7.84	1	0	4	0.602836
1	1	0	53	28.09	1	6	7	0.602836
1	1	0	40	16	1	0	6	0.838461
1	1	1	29	8.41	1	0	4	0
1	1	0	23	5.29	1	12	5	0.708856
1	1	0	30	9	1	9	3	0.806802
1	1	1	28	7.84	1	9	3	0
1	1	1	27	7.29	1	9	6	0.739794
1	1	1	29	8.41	1	9	10	0.473589
1	1	0	50	25	0	0	3	0
1	1	0	75	56.25	0	0	3	0.47253
1	1	1	50	25	1	15	4	0
1	1	0	31	9.61	1	0	3	0.602694
1	1	1	63	39.69	1	0	6	0.80245
1	1	0	50	25	0	0	4	0.674976
1	1	0	65	42.25	1	0	2	0.58647
1	1	0	65	42.25	1	0	2	0.789561
1	1	0	65	42.25	1	0	2	0.704056
1	1	0	65	42.25	1	0	2	0.800009
1	1	0	50	25	0	0	5	0.749285
1	1	0	54	29.16	0	6	2	0
1	1	0	36	12.96	1	9	5	0.652288
1	1	0	31	9.61	0	16	3	0.815812
1	1	1	50	25	1	6	4	0.781409
1	1	0	66	43.56	1	9	6	0
1	1	0	60	36	1	6	3	0.728155
1	1	0	62	38.44	1	9	2	0.673255
1	1	0	51	26.01	1	6	3	0.776642
1	1	0	50	25	0	9	3	0.565412
1	1	0	44	19.36	1	9	6	0.82097
1	1	0	40	16	0	12	2	0.560372
1	1	0	66	43.56	1	6	2	0.554559
1	1	0	38	14.44	1	12	4	0.554559
0	1	0	81	65.61	1	0	2	0.825366
1	1	1	29	8.41	1	12	7	0.72629
1	1	1	42	17.64	1	9	4	0.550463
1	1	1	31	9.61	1	9	6	0.869794
1	1	0	38	14.44	0	9	3	0.685869
1	1	0	53	28.09	1	6	5	0.938631
1	1	0	26	6.76	1	12	3	0.859808
1	1	0	29	8.41	1	0	4	0.553284
1	1	0	33	10.89	1	0	4	0.638438
1	1	0	52	27.04	1	6	4	0.718375
1	1	0	38	14.44	1	9	7	0.838461
1	1	0	31	9.61	1	0	4	0.713247
1	1	0	30	9	1	9	4	0.633929
1	1	0	27	7.29	1	9	2	0
1	1	1	54	29.16	1	12	3	0.437263
1	1	0	62	38.44	1	9	5	0
1	1	0	49	24.01	0	6	2	0
1	1	0	44	19.36	1	9	3	0
1	1	0	68	46.24	1	9	3	0.895661
1	1	0	50	25	0	9	3	0.790625
1	1	0	50	25	0	0	3	0.742799
1	1	1	64	40.96	1	0	3	0.733662
1	1	0	50	25	0	0	2	0.866035
1	1	0	50	25	0	9	4	0.826194
1	1	0	61	37.21	1	6	2	0.472852
1	1	0	30	9	1	9	4	0.841069
1	1	1	48	23.04	1	9	5	1.00427
0	1	0	50	25	1	6	4	1.0741
1	1	0	42	17.64	1	15	7	0.851726
1	1	0	41	16.81	1	9	6	0.718375
1	1	1	50	25	1	9	6	0.61928
1	1	0	50	25	1	0	2	0.758477
1	1	1	50	25	1	9	6	0.893431
1	1	1	50	25	1	9	6	0.885749
1	1	1	20	4	0	12	5	0.676747
1	1	0	45	20.25	1	12	3	0.706894
1	1	1	43	18.49	1	6	8	0.839153
1	1	1	50	25	0	0	6	0.938318
1	1	1	62	38.44	1	9	2	0
1	1	1	59	34.81	1	9	6	0.869176
1	1	1	58	33.64	1	9	6	0.651882
1	1	1	30	9	0	6	4	0.811676
1	1	1	50	25	1	6	5	0.787405
1	1	0	25	6.25	0	9	1	0.619867
1	1	1	63	39.69	1	0	6	0.828582
1	1	1	33	10.89	1	9	6	0.739975
1	1	0	38	14.44	1	12	4	0.58647
1	1	0	37	13.69	1	9	7	0.697507
1	1	1	32	10.24	1	0	8	0.687809
1	1	1	37	13.69	0	9	3	0.689823
1	1	1	31	9.61	1	9	6	0.755558
1	1	1	80	64	0	9	6	0.904943
1	1	1	32	10.24	1	9	7	0.765346
1	1	1	50	25	1	6	6	0.771091
1	1	1	44	19.36	1	0	2	0.774181
1	1	1	36	12.96	0	9	3	0.446716
1	1	0	50	25	0	0	2	0.725772
1	1	1	46	21.16	1	6	6	0.919371
1	1	1	50	25	1	12	5	0.718977
1	1	1	45	20.25	1	9	4	0.977468
1	1	1	19	3.61	0	9	3	0.824142
1	1	0	50	25	0	16	4	0.58647
1	1	1	54	29.16	1	0	4	0.716836
1	1	1	29	8.41	1	9	4	0.716836
1	1	1	50	25	1	12	8	0.6
0	1	1	60	36	1	12	2	0.795237
1	1	1	61	37.21	0	0	1	0.709409
1	1	1	43	18.49	1	12	6	0.964204
1	1	1	52	27.04	1	0	6	0.556134
1	1	0	30	9	1	9	4	0.638438
1	1	0	50	25	0	6	3	0.674743
1	1	0	37	13.69	1	9	6	0.787479
1	1	0	50	25	1	9	6	0.800429
0	1	0	60	36	1	9	2	1.00935
1	1	1	69	47.61	1	6	2	0.944557
1	1	1	51	26.01	1	0	4	0.785003
1	1	1	46	21.16	1	6	6	0.864749
0	1	1	29	8.41	0	9	3	0.864853
1	1	0	32	10.24	1	15	5	0.861921
1	1	0	49	24.01	1	6	5	0.623323
1	1	0	42	17.64	1	6	5	0.645496
1	1	0	50	25	1	9	5	0.608152
1	1	0	54	29.16	1	9	2	0.941382
1	1	1	30	9	1	0	4	0.611927
1	1	1	61	37.21	1	9	4	0.665815
1	1	0	50	25	0	0	8	0.61098
1	1	1	31	9.61	1	9	6	0.847388
1	1	0	49	24.01	1	6	4	0
1	1	1	50	25	1	0	7	0.866547
1	1	0	50	25	1	12	5	0.605851
1	1	0	50	25	1	12	5	0.605851
1	1	1	52	27.04	1	9	3	0
1	1	0	46	21.16	1	6	4	0.764831
0	0	1	63	39.69	1	0	2	1.01668
1	1	0	50	25	0	0	1	0.674743
1	1	0	60	36	1	9	4	0.602694
1	1	0	64	40.96	1	9	3	0.75
1	1	1	52	27.04	0	9	1	0
1	1	0	64	40.96	1	0	2	0.826194
1	1	1	54	29.16	1	6	2	0.553284
1	1	0	65	42.25	1	0	2	0
0	1	1	66	43.56	0	6	1	0.924743
1	1	0	61	37.21	1	9	6	0.758745
0	0	0	75	56.25	1	0	2	1.09177
1	1	0	55	30.25	1	9	4	0
1	1	0	50	25	0	0	1	0
1	1	1	74	54.76	1	0	2	0.779241
1	1	1	47	22.09	1	9	5	0.49618
1	1	1	61	37.21	1	0	2	0.597283
1	1	1	78	60.84	1	9	2	0.68549
1	1	1	50	25	0	0	4	0.68549
1	1	0	50	25	0	0	1	0.566323
1	1	1	50	25	1	6	4	0.519703
1	1	1	26	6.76	1	12	8	0.576579
1	1	1	65	42.25	1	0	5	0.5632
1	1	1	61	37.21	1	0	5	0.815369
0	0	1	49	24.01	1	6	2	0.973272
1	1	1	44	19.36	1	9	4	0
1	1	1	50	25	1	9	8	0.711141
0	0	0	70	49	1	15	2	0.931699
1	1	1	38	14.44	0	6	6	0.689802
1	1	0	51	26.01	1	6	8	0.565928
1	1	1	45	20.25	1	6	5	0.646248
1	1	0	66	43.56	1	0	6	0.78427
1	1	0	50	25	1	9	5	0.574375
0	1	1	50	25	0	0	2	0.94755
0	1	0	31	9.61	1	12	6	0.906063
1	1	1	50	25	1	12	5	0.83132
1	1	1	63	39.69	1	9	3	0.692237
1	1	1	50	25	1	9	3	0.696115
1	1	1	47	22.09	1	9	3	0.605418
1	1	1	50	25	1	0	2	0.605418
1	1	0	60	36	1	12	2	0.701217
1	1	0	31	9.61	1	6	4	0.701217
1	1	1	39	15.21	1	6	6	0.518505
1	1	1	35	12.25	1	9	4	0.911778
1	1	1	69	47.61	1	6	2	0.539837
0	0	1	78	60.84	1	9	2	1.23219
1	1	1	40	16	1	6	4	0.678499
1	1	0	30	9	1	9	4	0.697472
1	1	1	30	9	1	9	5	0.767498
0	0	0	50	25	0	0	1	1.24839
1	1	1	50	25	1	0	4	0.602836
1	1	1	45	20.25	1	6	2	0.446115
1	1	1	37	13.69	1	6	6	0.54433
1	1	1	73	53.29	1	6	2	0.656458
1	1	1	72	51.84	1	9	2	0.802111
1	1	1	71	50.41	1	9	2	0.597243
0	0	1	66	43.56	1	6	3	1.30793
1	1	1	36	12.96	1	12	5	0.768102
1	1	1	50	25	1	6	3	0.768102
1	1	1	65	42.25	1	6	2	0
1	1	0	50	25	0	0	1	0.845204
1	1	0	32	10.24	1	6	4	0.845204
1	1	1	44	19.36	1	6	4	0.573952
1	1	1	44	19.36	1	9	4	0.558997
1	1	1	53	28.09	1	6	2	0.742279
1	1	1	27	7.29	0	9	4	0.450122
1	1	1	41	16.81	1	6	5	0
1	1	1	67	44.89	1	0	3	0.934628
1	1	1	50	25	1	0	3	0.934628
1	1	0	50	25	1	9	8	0.88565
0	0	0	50	25	1	9	1	0.88565
1	1	1	50	25	0	0	2	0.627517
1	1	0	39	15.21	1	9	5	0.823487
0	1	1	50	25	1	12	4	0.930958
1	1	0	50	25	1	15	3	0.590646
1	1	0	59	34.81	1	12	5	0.690859
1	1	0	31	9.61	1	16	7	0.883628
1	1	1	54	29.16	1	9	2	0.660964
1	1	0	32	10.24	1	9	2	0.673255
1	1	1	50	25	0	16	6	0
1	1	0	69	47.61	0	0	2	3
1	1	0	50	25	1	0	6	0.789388
1	1	0	38	14.44	1	9	4	0.553751
0	0	1	54	29.16	1	9	2	0.911525
1	1	0	65	42.25	1	6	6	0.61369
1	1	1	55	30.25	1	9	3	0.71538
1	1	0	51	26.01	1	9	2	0
1	1	0	48	23.04	1	9	3	0.446716
1	1	0	48	23.04	1	9	2	0.446716
1	1	0	50	25	1	9	2	0.694538
0	1	1	71	50.41	1	9	2	0.925406
1	1	0	28	7.84	1	9	5	0.690859
1	1	1	33	10.89	1	9	8	0.519085
1	1	1	65	42.25	1	6	2	0.76902
1	1	1	18	3.24	0	12	3	0.513457
1	1	1	64	40.96	1	0	2	0.574637
1	1	1	61	37.21	1	9	2	0.61928
1	1	1	45	20.25	1	9	5	0.5
1	1	1	50	25	1	12	3	0.544575
1	1	1	37	13.69	1	6	4	0.591226
1	1	1	48	23.04	1	9	3	0.595601
1	1	1	42	17.64	0	6	4	0.520647
1	1	1	36	12.96	1	9	4	0.553284
1	1	1	71	50.41	0	6	1	0.949357
1	1	1	25	6.25	1	6	7	0.656828
1	1	1	36	12.96	1	9	4	0.879787
1	1	1	52	27.04	1	6	5	0.580531
1	1	0	41	16.81	1	9	4	0
1	1	0	51	26.01	1	0	2	0.590499
1	1	0	50	25	1	6	4	0.590499
1	1	0	28	7.84	1	6	4	0.590499
1	1	1	48	23.04	1	6	2	0.572307
1	1	1	61	37.21	1	0	2	0.737311
1	1	1	50	25	1	6	5	0.697507
1	1	1	67	44.89	1	0	6	0.557482
1	1	0	67	44.89	1	6	2	0.584082
1	1	1	50	25	1	9	6	0.809969
1	1	1	19	3.61	0	9	1	0.809969
1	1	1	80	64	0	6	1	0.957384
1	1	0	71	50.41	0	0	1	0.975676
1	1	0	50	25	0	0	2	0
1	1	1	65	42.25	1	0	2	0.812503
0	1	1	64	40.96	1	9	2	0.918881
1	1	0	72	51.84	1	6	2	0.650515
1	1	1	69	47.61	1	0	3	0.696115
1	1	1	47	22.09	1	0	3	0.513953
1	1	1	64	40.96	1	12	5	0.591226
1	1	0	51	26.01	1	0	2	0.492134
1	1	0	28	7.84	1	16	2	0.492134
1	1	1	64	40.96	1	0	2	0.622073
1	1	1	65	42.25	0	0	1	0.761901
1	1	1	49	24.01	1	9	2	0.815153
1	1	0	50	25	0	0	4	0.781758
1	1	0	50	25	0	0	4	0.651133
1	1	0	28	7.84	1	12	7	0.802447
1	1	0	69	47.61	1	0	2	0.688509
1	1	1	62	38.44	1	6	3	0.80389
1	1	1	73	53.29	0	0	1	0
1	1	0	69	47.61	1	9	2	0.804314
1	1	1	24	5.76	0	16	4	0.727935
1	1	0	52	27.04	1	9	4	0.873042
1	1	0	50	25	1	9	3	0.873042
0	1	1	66	43.56	1	0	2	0.867016
0	1	0	50	25	0	12	4	0.920494
0	1	0	61	37.21	1	9	2	0.803044
1	1	0	50	25	1	6	2	0.727713
1	1	0	50	25	1	9	3	0.727713
1	1	0	50	25	0	0	1	0.727713
1	1	0	61	37.21	1	12	4	0.839337
1	1	0	76	57.76	1	6	2	0.717091
1	1	1	65	42.25	1	0	5	0.766156
1	1	1	66	43.56	1	0	2	0.87914
1	1	0	66	43.56	1	6	2	1.03951
1	1	1	52	27.04	1	6	3	0.703523
1	1	0	50	25	1	12	3	0.603676
1	1	1	69	47.61	1	0	2	0.885555
1	1	1	63	39.69	1	12	2	0.406833
1	1	1	61	37.21	1	9	2	0.815874
1	1	1	62	38.44	1	9	4	0.602599
1	1	1	55	30.25	1	6	6	0.5
1	1	1	74	54.76	0	6	1	0.740773
1	1	1	69	47.61	1	6	3	0.929621
1	1	1	73	53.29	0	0	1	0.811944
1	1	1	80	64	0	0	1	0.805925
1	1	1	69	47.61	1	6	2	0.663072
1	1	0	50	25	1	6	4	0.755558
1	1	1	30	9	1	12	7	0.767498
1	1	0	64	40.96	1	9	2	0.55838
1	1	1	36	12.96	1	6	6	0.664711
1	1	0	51	26.01	1	6	2	0.834725
1	1	0	33	10.89	1	9	7	0.936999
1	1	0	66	43.56	1	0	5	0.907886
1	1	1	51	26.01	1	6	6	0.965197
1	1	1	31	9.61	1	9	6	0.705017
1	1	1	26	6.76	1	15	5	0.650816
1	1	1	43	18.49	1	9	3	0.749514
1	1	1	63	39.69	1	6	2	0.620522
1	1	0	56	31.36	1	12	2	0.544836
1	1	0	39	15.21	1	9	7	0.553284
1	1	0	55	30.25	1	9	2	0.654755
1	1	0	31	9.61	1	9	2	0.661763
1	1	0	63	39.69	1	0	5	0.677446
1	1	0	76	57.76	1	0	2	0.780214
1	1	1	53	28.09	0	6	2	0.755558
1	1	0	31	9.61	1	9	7	0.641459
1	1	0	29	8.41	1	6	4	0.700088
1	1	1	29	8.41	1	9	6	0.780618
1	1	0	50	25	1	0	2	0.825257
1	1	0	50	25	1	12	4	0.825257
1	1	0	50	25	1	9	6	0.73372
1	1	1	43	18.49	1	6	4	0.581428
1	1	1	48	23.04	0	9	2	0
1	1	1	26	6.76	1	12	2	0
0	0	0	50	25	1	0	1	1.04194
1	1	1	50	25	1	15	6	0.940986
1	1	0	58	33.64	1	0	5	0.783636
1	1	0	29	8.41	1	9	6	0.693757
1	1	0	70	49	1	6	2	0.718448
1	1	0	45	20.25	1	6	3	0
1	1	0	50	25	0	15	1	0
1	1	1	47	22.09	1	0	4	0.564471
1	1	0	46	21.16	1	9	3	0.575937
1	1	0	71	50.41	1	6	2	0.658518
1	1	1	18	3.24	0	6	3	0.574895
1	1	1	46	21.16	1	0	5	0.567502
1	1	1	61	37.21	0	6	1	0.767983
1	1	1	50	25	0	0	2	0.758926
1	1	1	85	72.25	0	0	1	0.917728
1	1	0	54	29.16	1	9	2	0.618554
1	1	0	57	32.49	1	6	3	0
1	1	1	64	40.96	1	9	2	0.477346
1	1	1	45	20.25	1	9	7	0.821353
1	1	0	56	31.36	1	9	2	0.751827
1	1	1	65	42.25	1	0	2	0.863202
1	1	1	58	33.64	1	9	2	0.742318
1	1	1	61	37.21	0	6	1	0.922874
1	1	0	61	37.21	1	9	3	0.697507
1	1	1	48	23.04	1	6	3	0.639598
1	1	1	77	59.29	0	0	1	0.819141
1	1	1	47	22.09	1	0	3	0.690859
1	1	1	53	28.09	0	9	1	0.692865
1	1	1	86	73.96	0	0	3	0.752173
1	1	1	49	24.01	1	12	3	0.637668
1	1	1	50	25	1	9	3	0.637668
1	1	1	25	6.25	0	15	4	0.457982
1	1	1	78	60.84	1	6	2	0.840647
1	1	1	74	54.76	1	6	2	0.86928
1	1	1	71	50.41	1	6	5	0.776642
1	1	0	49	24.01	1	0	2	0.661492
1	1	1	76	57.76	0	6	1	0.750585
1	1	0	52	27.04	1	6	3	0.737311
1	1	1	50	25	1	12	2	1
1	1	1	50	25	1	9	4	0.670073
1	1	1	23	5.29	0	16	1	0.670073
1	1	1	39	15.21	1	0	4	0.565931
1	1	1	50	25	0	6	1	0.759022
1	1	1	66	43.56	1	6	2	0.812781
1	1	1	77	59.29	1	9	2	0.729654
1	1	0	50	25	1	9	5	0
1	1	1	54	29.16	1	6	2	0.527724
1	1	1	50	25	1	9	4	0.469302
1	1	0	36	12.96	1	9	4	0.553284
1	1	1	54	29.16	1	9	2	0.489688
1	1	1	25	6.25	1	0	3	0.489688
0	1	1	64	40.96	1	12	2	0.964243
1	1	0	58	33.64	1	6	5	0
1	1	1	69	47.61	1	0	3	0.638544
1	1	1	58	33.64	1	12	3	0.7254
1	1	1	61	37.21	1	9	3	0.961996
1	1	1	54	29.16	1	9	3	0.75304
1	1	0	50	25	0	0	5	0.965315
1	1	0	61	37.21	1	0	5	0.858503
1	1	0	34	11.56	1	9	7	1.0269
1	1	1	72	51.84	1	0	4	0.805071
1	1	0	66	43.56	0	0	1	0.742749
1	1	1	64	40.96	0	9	1	0.977228
1	1	1	70	49	0	6	1	0.729654
1	1	0	62	38.44	1	6	3	0
1	1	0	50	25	1	9	3	0.627517
1	1	0	32	10.24	1	6	7	0.960669
1	1	1	61	37.21	1	9	3	0.849079
1	1	1	50	25	0	0	3	0.849079
1	1	1	50	25	1	12	6	0.687801
1	1	1	63	39.69	1	12	6	0.693213
1	1	1	39	15.21	1	9	6	0.681313
1	1	1	40	16	1	9	5	0.472909
0	1	0	50	25	1	6	4	0.928944
1	1	1	40	16	1	12	5	0.747396
1	1	0	26	6.76	1	12	4	0.660206
1	1	1	45	20.25	1	9	4	0.584321
0	1	1	50	25	1	9	6	0.911418
1	1	1	24	5.76	0	15	4	0.683088
1	1	1	31	9.61	1	9	6	0.62673
1	1	1	52	27.04	1	9	4	0.742778
1	1	1	26	6.76	1	12	8	0.754
1	1	0	50	25	1	6	4	0.647988
1	1	1	55	30.25	1	9	7	0.605131
1	1	1	30	9	1	15	6	0.82777
1	1	1	31	9.61	1	9	7	0.803764
1	1	0	50	25	0	0	5	0.637851
0	1	0	51	26.01	1	9	2	0.893431
1	1	1	67	44.89	1	0	2	0.608752
1	1	0	24	5.76	0	12	1	0.715917
1	1	1	45	20.25	1	6	3	0.608752
1	1	1	41	16.81	1	9	6	0.709409
1	1	1	40	16	1	9	3	0.670447
1	1	0	35	12.25	1	9	6	0.588482
1	1	0	35	12.25	1	9	7	0.588482
1	1	0	53	28.09	1	9	2	0.659517
1	1	0	53	28.09	1	9	2	0.742318
1	1	0	31	9.61	1	9	4	0.638438
1	1	0	63	39.69	1	0	3	0.89697
1	1	1	45	20.25	1	12	4	0.472152
1	1	1	47	22.09	1	6	4	0.739975
1	1	0	29	8.41	1	9	9	0.627858
1	1	0	46	21.16	1	6	6	0.785597
1	1	0	49	24.01	1	6	4	0.573394
1	1	0	60	36	0	0	1	0.629488
1	1	1	29	8.41	1	9	7	0.753213
0	0	1	65	42.25	1	0	2	1.33463
1	1	1	45	20.25	1	9	7	0.625992
1	1	1	23	5.29	0	9	4	0
1	1	1	64	40.96	1	9	3	0.674976
1	1	1	50	25	1	14	4	0.549173
1	1	0	60	36	1	12	2	0.753861
1	1	1	67	44.89	1	12	5	0.746775
1	1	1	47	22.09	1	9	6	0.717493
1	1	0	50	25	1	9	5	0.791123
1	1	1	20	4	0	12	5	0.503816
1	1	0	34	11.56	1	9	4	0.858833
1	1	0	38	14.44	1	9	6	0.776642
1	1	0	69	47.61	0	6	1	0.457772
1	1	0	50	25	0	0	2	1.08009
1	1	0	29	8.41	1	6	6	0
1	1	0	50	25	1	9	7	0.52143
1	1	0	65	42.25	1	6	3	0.522448
1	1	0	45	20.25	1	6	6	0
1	1	0	20	4	0	9	5	0
1	1	0	49	24.01	1	6	2	0.558997
1	1	0	26	6.76	1	9	3	0.558997
1	1	0	30	9	1	9	6	0.852496
0	1	1	28	7.84	1	9	4	1
1	1	1	31	9.61	1	0	5	0.658342
1	1	0	20	4	0	12	6	0.918881
1	1	1	28	7.84	1	16	8	0.648788
1	1	1	50	25	1	0	3	0.668741
1	1	1	50	25	0	0	5	0.64992
0	0	1	50	25	1	9	2	0.949145
1	1	1	40	16	1	12	6	0.979042
1	1	1	66	43.56	1	0	6	0.867617
1	1	1	50	25	0	0	8	0.915313
1	1	1	50	25	1	15	8	0.612063
1	1	0	53	28.09	1	12	3	0.769467
1	1	0	23	5.29	0	15	1	0.769467
1	1	0	53	28.09	1	9	2	0
1	1	0	50	25	1	6	2	0.625345
1	1	0	29	8.41	0	15	3	0.604985
1	1	1	51	26.01	1	6	2	0.580107
1	1	1	22	4.84	0	9	3	0.788835
1	1	0	31	9.61	1	9	6	0.75563
1	1	1	62	38.44	1	9	2	0.635334
1	1	0	65	42.25	1	6	3	0.991903
1	1	0	62	38.44	1	9	2	0.565502
1	1	1	43	18.49	1	9	4	0.638438
1	1	1	58	33.64	1	12	3	0.453032
1	1	1	34	11.56	1	12	3	0.453032
1	1	0	45	20.25	1	6	4	0.650591
1	1	0	56	31.36	1	9	4	0.736433
0	0	1	44	19.36	1	9	5	1.02249
1	1	1	34	11.56	1	12	5	0.638279
1	1	1	33	10.89	1	9	6	0.722457
1	1	0	47	22.09	1	9	2	0
1	1	0	58	33.64	1	12	3	0.636097
1	1	1	45	20.25	1	6	3	0.595785
1	1	1	62	38.44	1	9	2	0
1	1	1	57	32.49	1	9	4	0
1	1	1	50	25	1	9	3	0.494504
1	1	1	66	43.56	1	12	6	0
1	1	0	28	7.84	1	6	4	0
1	1	0	51	26.01	1	6	3	0.899554
1	1	1	66	43.56	1	0	5	0.724769
1	1	0	50	25	0	0	5	0.685301
1	1	0	69	47.61	1	0	2	0.9043
0	0	0	46	21.16	1	6	3	0.980121
1	1	0	50	25	0	12	3	0.607801
0	1	0	52	27.04	1	6	2	0.929573
0	0	1	55	30.25	0	0	1	1.14866
1	1	0	33	10.89	1	6	3	0.605872
1	1	0	33	10.89	1	6	4	0.825257
1	1	0	50	25	1	0	4	0.751421
1	1	1	45	20.25	1	6	4	0.543239
0	1	1	49	24.01	1	15	2	0.879195
1	1	0	45	20.25	1	6	5	0
1	1	0	58	33.64	1	0	4	0.724498
1	1	0	41	16.81	1	9	4	0.815152
1	1	0	26	6.76	0	9	6	0.600097
1	1	0	50	25	1	6	4	0.437809
1	1	0	42	17.64	1	0	4	0.52352
1	1	0	67	44.89	0	0	2	0.52352
1	1	0	34	11.56	1	6	7	0.685708
1	1	0	52	27.04	1	0	2	0.679707
1	1	1	36	12.96	1	9	6	0.674868
1	1	0	61	37.21	1	9	4	0.505553
1	1	0	34	11.56	1	9	1	0.505553
1	1	0	38	14.44	1	9	1	0.505553
1	1	1	47	22.09	1	6	2	0
1	1	1	50	25	1	6	6	0.807319
1	1	0	62	38.44	1	9	2	0.685976
1	1	1	55	30.25	1	6	6	0.639401
1	1	1	60	36	1	9	3	0.706621
1	1	1	46	21.16	1	6	3	0
1	1	1	23	5.29	0	15	1	0
1	1	0	50	25	1	9	4	0.633929
1	1	1	49	24.01	1	9	3	0.839573
1	1	0	52	27.04	1	0	3	0.913198
1	1	0	50	25	0	0	4	0.762594
1	1	1	50	25	1	6	4	0.682235
1	1	1	48	23.04	1	9	2	0.755959
1	1	1	26	6.76	1	12	3	0.755959
1	1	1	58	33.64	1	0	6	0.871726
1	1	1	58	33.64	1	9	3	0.603533
1	1	0	52	27.04	1	6	4	0.652036
0	1	1	67	44.89	1	9	2	1.02249
1	1	1	62	38.44	1	9	4	0.836873
1	1	1	48	23.04	1	6	5	0
1	1	1	50	25	1	12	6	0.800513
1	1	1	50	25	0	0	2	0.832553
1	1	1	62	38.44	1	9	3	0.833669
1	1	1	66	43.56	1	0	2	1.04298
1	1	1	38	14.44	1	6	4	0.420398
0	0	1	58	33.64	1	0	2	1.38048
1	1	1	54	29.16	1	6	5	0.585107
1	1	0	55	30.25	1	12	2	0.700125
0	1	0	50	25	0	12	1	0.826194
1	1	1	54	29.16	1	12	3	0.802728
1	1	1	27	7.29	1	16	3	0.802728
1	1	1	50	25	1	12	3	0.89297
1	1	0	68	46.24	1	9	6	0.72944
1	1	1	34	11.56	1	12	5	0.720451
1	1	1	62	38.44	1	6	7	0.626534
1	1	0	25	6.25	0	12	4	0.660774
1	1	0	50	25	1	0	3	0.660774
1	1	0	32	10.24	1	9	4	0.660201
1	1	1	36	12.96	1	12	7	0.690339
1	1	1	38	14.44	1	9	4	0.513012
1	1	1	35	12.25	1	9	7	0.569932
1	1	1	43	18.49	1	9	3	0.64353
1	1	0	60	36	1	0	8	0.767958
1	1	1	50	25	1	6	2	0.835517
1	1	1	62	38.44	1	0	8	0.771631
1	1	1	47	22.09	0	9	3	0
1	1	1	58	33.64	1	6	2	0.72566
1	1	0	50	25	1	6	4	0.77696
1	1	0	25	6.25	0	9	5	0.749458
1	1	1	59	34.81	1	6	2	0.72754
1	1	1	42	17.64	1	9	4	0.587202
1	1	1	50	25	1	6	3	0.599181
1	1	0	39	15.21	1	9	5	0.708927
1	1	0	59	34.81	1	12	2	0.673255
1	1	0	50	25	1	9	7	0.803764
1	1	0	24	5.76	0	9	5	0.605107
1	1	0	40	16	1	9	4	0
1	1	1	52	27.04	1	9	2	0.790714
1	1	1	49	24.01	1	9	4	0.550463
1	1	1	45	20.25	1	6	4	0.690859
1	1	0	44	19.36	1	12	5	0.677082
1	1	1	48	23.04	1	0	4	0.627858
1	1	1	26	6.76	1	16	3	0.564857
1	1	1	38	14.44	1	9	4	0
1	1	0	69	47.61	1	12	2	0.461113
1	1	0	50	25	1	9	3	0.669367
1	1	0	24	5.76	0	16	1	0.669367
1	1	0	77	59.29	0	6	1	0.874483
1	1	1	44	19.36	1	6	4	0.505968
1	1	0	56	31.36	1	9	6	0.681024
1	1	1	37	13.69	1	9	4	0
1	1	1	53	28.09	1	6	6	0.624992
1	1	1	50	25	1	9	5	0.785434
0	0	0	66	43.56	1	0	2	1.04955
1	1	0	25	6.25	0	12	3	0.590646
1	1	1	65	42.25	1	6	2	0.892419
1	1	0	43	18.49	1	9	4	0.767498
1	1	1	50	25	0	0	6	0.801193
1	1	0	60	36	1	0	2	1.18543
1	1	0	73	53.29	0	0	2	1.0727
1	1	0	66	43.56	1	0	2	0.96799
1	1	1	51	26.01	1	0	5	0.858273
1	1	1	50	25	1	6	5	0.881237
0	0	0	59	34.81	1	0	2	1.102
0	1	0	73	53.29	1	9	2	0.911998
0	0	1	56	31.36	1	9	5	0.970122
0	0	1	50	25	0	0	3	0.970122
1	1	1	50	25	1	16	8	0.647322
1	1	0	60	36	1	12	13	0.626916
1	1	0	50	25	1	9	6	0.61369
1	1	1	68	46.24	0	0	2	0.584241
0	0	0	77	59.29	0	6	1	0.979376
1	1	0	51	26.01	1	6	3	0.808439
0	1	1	31	9.61	0	0	2	1.00084
1	1	1	47	22.09	1	0	4	0.788302
1	1	1	52	27.04	1	6	2	0.719537
1	1	1	52	27.04	1	0	3	0.744817
1	1	1	50	25	0	0	2	0.679248
1	1	1	27	7.29	1	9	4	0.768113
1	1	0	27	7.29	1	9	4	0.586469
1	1	0	23	5.29	0	15	5	0.727713
1	1	0	42	17.64	1	0	4	0
0	1	0	61	37.21	1	9	2	1.16228
1	1	0	50	25	0	0	4	1.16228
1	1	0	70	49	1	6	2	0.939613
1	1	1	57	32.49	1	12	8	0.796948
1	1	1	69	47.61	1	0	2	0.943332
1	1	0	69	47.61	1	6	2	0.972129
1	1	1	50	25	1	9	2	0.897458
1	1	1	35	12.25	1	6	6	0.754695
1	1	1	63	39.69	1	0	2	0.908807
1	1	0	69	47.61	1	0	2	0.661763
1	1	0	36	12.96	1	0	9	1.05334
1	1	1	57	32.49	1	12	3	0.797846
1	1	1	50	25	1	9	7	0.520143
1	1	1	46	21.16	1	9	5	0
1	1	0	75	56.25	0	9	2	3.25527
1	1	1	24	5.76	0	9	6	0.789388
1	1	0	50	25	1	12	3	0.75
1	1	1	49	24.01	1	6	6	0.61928
1	1	0	63	39.69	1	6	3	0.71004
1	1	0	49	24.01	1	9	2	0.61928
1	1	1	28	7.84	1	12	7	0.713778
1	1	1	50	25	1	15	5	0.77617
0	0	1	67	44.89	0	6	1	1.06988
1	1	0	52	27.04	1	0	3	0.674927
1	1	1	50	25	0	9	4	0.980589
1	1	1	51	26.01	1	9	4	0.767337
1	1	1	50	25	1	12	3	0.660206
1	1	1	37	13.69	1	9	6	0.754416
1	1	0	50	25	0	0	1	1.20069
1	1	1	50	25	0	0	6	0.582216
1	1	0	50	25	1	6	3	0.546188
1	1	0	29	8.41	1	9	3	0.546188
1	1	1	45	20.25	1	6	4	0.574375
1	1	1	31	9.61	1	9	6	0.484386
1	1	1	48	23.04	1	9	4	0.691364
1	1	1	48	23.04	1	9	2	0.691364
1	1	0	64	40.96	1	9	5	0.837144
1	1	1	62	38.44	0	9	4	0.807612
1	1	1	26	6.76	1	9	6	0.521826
1	1	1	54	29.16	1	9	4	0.64432
1	1	1	50	25	0	0	2	0.64432
1	1	0	34	11.56	1	9	3	0.697507
1	1	0	50	25	0	0	3	0.697507
1	1	1	50	25	0	0	6	0.837144
1	1	1	34	11.56	1	15	9	0.787187
0	1	1	50	25	0	0	1	0.787187
1	1	0	50	25	0	0	1	0
1	1	0	32	10.24	1	9	5	0.553235
1	1	1	56	31.36	1	9	4	0.766467
1	1	0	43	18.49	1	9	5	0.366316
1	1	1	58	33.64	1	6	2	0.744077
1	1	1	46	21.16	1	6	3	0
1	1	0	54	29.16	1	9	9	0.73563
1	1	1	63	39.69	1	0	5	0.77681
1	1	1	40	16	1	6	5	0.506381
1	1	1	62	38.44	1	9	6	0.580618
1	1	0	37	13.69	1	6	4	0.623889
0	1	1	63	39.69	1	0	5	0.967281
1	1	0	62	38.44	1	6	2	0.767498
1	1	0	72	51.84	1	6	2	0.790003
1	1	0	24	5.76	0	12	3	0.537198
1	1	0	62	38.44	1	6	6	0.754919
1	1	0	66	43.56	1	9	3	0.655123
1	1	0	51	26.01	1	9	3	0.641479
1	1	1	35	12.25	1	9	6	0.606303
1	1	0	69	47.61	1	9	2	0.543669
1	1	0	50	25	0	0	5	0.670951
1	1	0	50	25	0	0	2	0.779463
1	1	0	62	38.44	1	0	6	0.528701
0	0	0	64	40.96	1	0	2	1.1067
1	1	1	56	31.36	1	6	2	0.612267
1	1	1	50	25	1	0	6	0.483042
1	1	0	50	25	1	6	4	3
1	1	1	26	6.76	1	9	4	0.918929
1	1	1	59	34.81	1	9	6	0.655331
1	1	1	43	18.49	1	0	4	0.553786
1	1	1	62	38.44	1	0	5	0.799246
1	1	1	50	25	1	0	5	0.800624
1	1	1	50	25	1	6	2	0.800624
1	1	1	50	25	1	0	6	0.97954
1	1	0	36	12.96	1	9	3	0
1	1	1	49	24.01	1	6	4	0.620142
1	1	0	67	44.89	1	9	2	0.674743
0	0	1	66	43.56	1	0	2	0.984776
0	0	1	50	25	0	0	2	0.883801
1	1	1	56	31.36	1	9	2	0.53756
1	1	1	29	8.41	1	9	3	0.53756
1	1	1	67	44.89	1	6	2	0.822653
1	1	1	62	38.44	1	9	2	0.823235
1	1	0	64	40.96	1	0	3	0.746735
1	1	0	50	25	1	6	9	0.759453
1	1	0	26	6.76	1	6	5	0.643815
1	1	0	51	26.01	1	9	2	0.425625
1	1	0	50	25	0	0	5	0.887708
1	1	0	50	25	0	6	2	0.940024
1	1	0	35	12.25	1	9	5	0.697539
1	1	1	55	30.25	1	0	2	0.869267
1	1	1	35	12.25	1	9	3	0.869267
1	1	0	52	27.04	1	6	3	0.778486
1	1	0	66	43.56	0	6	1	0.729654
1	1	0	74	54.76	1	0	5	0.604985
1	1	0	45	20.25	1	9	2	0.826194
1	1	0	72	51.84	0	6	2	1.12055
1	1	1	77	59.29	0	0	1	0.555238
1	1	0	55	30.25	1	9	6	0.812826
1	1	0	54	29.16	1	12	8	0
0	1	0	34	11.56	1	15	13	0.952773
1	1	1	64	40.96	1	9	2	0.832865
1	1	0	68	46.24	1	6	2	1
1	1	0	78	60.84	0	0	1	1.10352
1	1	0	34	11.56	1	12	6	0.869176
1	1	0	50	25	0	0	2	0.732721
1	1	1	52	27.04	1	0	6	0.651987
1	1	0	29	8.41	1	9	3	0.918881
1	1	0	74	54.76	1	9	2	0.829192
1	1	0	74	54.76	1	0	2	1
1	1	0	63	39.69	1	0	2	0
1	1	1	57	32.49	0	0	1	0.712406
1	1	0	50	25	1	0	2	0
1	1	0	64	40.96	1	0	2	0.916428
0	1	1	43	18.49	1	9	5	1
1	1	0	51	26.01	1	12	4	0
1	1	1	68	46.24	1	9	5	0.80858
1	1	1	36	12.96	1	9	3	0.523206
1	1	1	53	28.09	1	9	4	0.747127
1	1	1	52	27.04	1	9	7	0.697468
1	1	1	52	27.04	1	12	4	0.697468
1	1	1	29	8.41	1	9	5	0.697468
1	1	1	50	25	1	9	5	0.727046
1	1	1	62	38.44	0	9	2	0.553284
1	1	1	74	54.76	0	6	5	0.787187
1	1	1	48	23.04	1	9	3	0.561423
1	1	1	50	25	0	0	2	0.561423
1	1	1	34	11.56	1	9	6	0.669088
1	1	1	31	9.61	1	6	6	0.727862
1	1	1	50	25	0	16	6	0.666629
1	1	1	50	25	0	9	2	0.697507
1	1	1	29	8.41	1	12	5	0.638438
1	1	1	47	22.09	1	6	2	0.651882
1	1	1	29	8.41	1	12	6	0.914602
1	1	0	50	25	0	0	5	0.734174
1	1	0	85	72.25	0	6	2	0.901242
1	1	1	52	27.04	1	6	5	0.567922
1	1	0	31	9.61	1	9	4	0.556935
1	1	1	55	30.25	1	9	2	0.7868
0	1	0	23	5.29	0	9	1	0.86079
1	1	0	73	53.29	0	6	1	0.861882
1	1	1	51	26.01	0	9	4	0.881846
1	1	1	50	25	1	9	2	0.638343
1	1	1	50	25	1	9	3	0.638343
1	1	1	52	27.04	1	15	6	0
1	1	0	59	34.81	1	6	5	0.737311
1	1	1	38	14.44	1	12	5	0.97497
1	1	1	50	25	1	6	4	0.833382
1	1	0	68	46.24	1	0	4	0.651882
1	1	1	74	54.76	1	6	2	0.763735
0	1	0	69	47.61	1	6	2	0.93001
1	1	0	62	38.44	1	9	4	0.776559
1	1	0	45	20.25	1	6	4	0.605473
1	1	0	33	10.89	1	12	8	0.673255
1	1	1	84	70.56	0	9	3	0.644716
1	1	0	45	20.25	1	6	3	0.698953
1	1	0	48	23.04	1	9	3	0.640856
1	1	1	51	26.01	1	9	4	0.50851
1	1	0	63	39.69	1	0	6	0.534995
1	1	0	50	25	1	0	4	0.534995
1	1	1	50	25	1	12	7	0.617814
1	1	1	50	25	1	0	6	0.638438
1	1	0	63	39.69	1	9	2	0.520143
1	1	0	50	25	0	0	4	0.975772
1	1	1	65	42.25	1	0	2	0.537611
1	1	1	53	28.09	1	6	3	0.593167
1	1	1	75	56.25	1	6	2	0.766873
1	1	1	43	18.49	1	9	4	0.741058
1	1	1	50	25	1	9	6	0.591226
1	1	1	50	25	1	9	6	0.601032
1	1	1	23	5.29	1	15	2	0.601032
1	1	1	44	19.36	1	9	3	0.525708
1	1	1	44	19.36	1	12	4	0.545576
1	1	1	61	37.21	1	12	2	0.595053
1	1	1	49	24.01	1	9	5	0
1	1	0	50	25	1	9	7	0.691916
1	1	1	26	6.76	1	12	5	0.621845
1	1	0	27	7.29	0	9	4	0
1	1	1	50	25	1	9	5	0.86002
1	1	1	55	30.25	1	6	5	0.823062
1	1	1	50	25	0	0	4	0.748258
0	1	0	59	34.81	1	6	2	0.93441
1	1	0	33	10.89	1	16	3	0.55515
0	0	1	50	25	0	0	4	1.02145
1	1	0	50	25	0	0	3	0
1	1	0	27	7.29	1	0	6	0.470182
1	1	0	33	10.89	1	16	6	0.628007
1	1	0	50	25	1	15	2	0.877666
1	1	1	55	30.25	1	9	5	0.808762
1	1	1	34	11.56	1	9	4	0.740833
1	1	0	29	8.41	1	6	6	0.586539
1	1	1	52	27.04	1	12	5	0
1	1	1	48	23.04	1	0	6	0.38801
1	1	0	50	25	1	0	3	0.746627
1	1	1	28	7.84	1	0	2	0.791872
1	1	0	36	12.96	1	15	4	0.720412
1	1	1	50	25	0	0	3	0.633457
1	1	1	28	7.84	1	12	7	0.745761
1	1	1	34	11.56	1	9	10	0.648894
1	1	1	32	10.24	1	9	5	0.709405
1	1	1	32	10.24	1	9	8	0.607716
1	1	0	30	9	1	12	2	0.486562
1	1	1	29	8.41	1	0	5	0.80395
1	1	1	50	25	0	0	3	0.72411
1	1	1	31	9.61	1	0	3	0.72411
1	1	0	50	25	1	9	5	0.716957
1	1	0	28	7.84	1	6	4	0.483367
1	1	0	50	25	1	15	3	0.632863
1	1	1	28	7.84	1	9	4	0.58647
1	1	0	50	25	0	0	3	0.553284
1	1	1	40	16	1	0	7	0.781953
1	1	1	32	10.24	1	15	8	0.687893
1	1	0	50	25	1	9	4	0.529416
1	1	0	24	5.76	1	0	4	0.580023
1	1	1	50	25	0	9	8	0.906213
1	1	1	36	12.96	1	9	6	0.690235
1	1	1	63	39.69	1	0	5	0.525704
1	1	0	32	10.24	1	0	3	0.533837
1	1	1	29	8.41	1	15	7	0.762793
0	1	0	50	25	1	12	4	0.84104
1	1	0	32	10.24	1	15	5	0.591548
1	1	0	50	25	0	0	3	0.762938
1	1	1	17	2.89	0	12	5	0.836075
1	1	0	50	25	1	0	4	1.15038
1	1	1	43	18.49	1	9	4	0.670073
1	1	1	50	25	1	0	3	0.769718
1	1	1	29	8.41	1	9	8	0.666304
1	1	0	50	25	0	0	3	0.660742
1	1	1	50	25	1	9	4	0.681313
1	1	1	50	25	1	9	6	0.670073
1	1	0	41	16.81	1	12	4	0.4
1	1	0	50	25	0	0	3	0.824004
1	1	1	43	18.49	0	0	3	0.698953
1	1	1	29	8.41	1	15	4	0
1	1	1	25	6.25	1	0	7	0.807674
1	1	0	50	25	0	0	3	0.734651
1	1	0	23	5.29	1	0	4	0.619183
1	1	0	29	8.41	1	0	8	0.777839
1	1	0	47	22.09	0	0	2	0.937304
1	1	0	29	8.41	1	9	4	0
0	1	0	66	43.56	1	0	4	0.922049
1	1	0	50	25	0	0	8	0.982374
1	1	1	50	25	1	9	4	0.763225
0	1	0	27	7.29	1	0	4	0.860206
1	1	0	55	30.25	1	6	5	0.625343
1	1	0	33	10.89	1	9	3	0
1	1	0	50	25	1	15	3	0.58647
1	1	0	50	25	1	15	4	0.550463
0	1	1	50	25	0	0	2	0.949556
1	1	1	50	25	1	6	3	0.527163
1	1	1	46	21.16	1	15	5	0.835517
1	1	1	50	25	1	9	2	0.751183
1	1	1	50	25	0	0	3	0.697507
1	1	1	46	21.16	1	9	4	0.759837
1	1	1	50	25	1	9	7	0.575937
1	1	0	50	25	1	9	6	0.702501
1	1	1	49	24.01	1	9	4	0.434588
1	1	1	82	67.24	0	0	3	0.806475
1	1	1	67	44.89	1	0	2	0.953392
1	1	1	50	25	1	6	6	0.626084
1	1	0	50	25	1	9	6	0.627858
1	1	1	34	11.56	1	9	6	0.673032
1	1	1	24	5.76	1	6	6	0.684091
1	1	1	41	16.81	1	12	4	0.446716
1	1	1	62	38.44	1	9	5	0.947777
1	1	1	50	25	0	0	4	0.645927
1	1	1	50	25	0	0	4	0.677823
1	1	1	31	9.61	1	0	6	0.736977
1	1	1	58	33.64	1	6	2	0.565412
1	1	1	51	26.01	1	6	2	0.645661
1	1	1	31	9.61	1	9	6	1.01918
1	1	1	66	43.56	1	0	2	0.811037
1	1	1	50	25	1	9	5	0.528848
1	1	1	52	27.04	1	6	6	0.776642
1	1	1	34	11.56	1	6	5	0.893431
1	1	1	50	25	1	0	2	0.681162
1	1	1	50	25	1	6	2	0.885749
1	1	1	66	43.56	1	6	5	0.678183
0	0	1	17	2.89	0	9	3	0.967035
0	1	1	63	39.69	1	0	2	1.08138
1	1	1	67	44.89	1	12	2	0.633996
1	1	0	65	42.25	1	0	6	0.697507
1	1	0	56	31.36	1	6	5	0.575012
1	1	1	50	25	1	0	4	0.767498
1	1	1	49	24.01	1	6	3	0.548343
1	1	1	45	20.25	1	0	6	0.914415
1	1	1	71	50.41	1	6	2	0.780214
1	1	1	74	54.76	1	6	4	0.913426
1	1	1	50	25	1	0	2	0.72495
1	1	1	58	33.64	1	0	2	0.718375
1	1	1	69	47.61	1	6	2	0.54264
0	1	1	47	22.09	0	6	4	1.07208
1	1	0	50	25	1	0	2	0
1	1	1	70	49	0	0	1	0.549079
0	0	1	78	60.84	0	6	1	0.90744
1	1	1	50	25	1	6	2	0.823926
1	1	1	41	16.81	0	12	3	0.643136
0	1	1	66	43.56	1	0	2	0.976792
0	1	1	38	14.44	1	9	3	0.976792
1	1	1	70	49	1	9	2	0.49752
1	1	0	79	62.41	1	6	2	0.583468
1	1	1	61	37.21	1	6	2	0.766509
1	1	1	68	46.24	1	6	2	1.1352
1	1	1	44	19.36	1	9	5	0.609742
1	1	1	46	21.16	0	9	2	0.710187
0	1	0	52	27.04	1	0	2	0.831097
1	1	1	66	43.56	1	6	2	0.618554
1	1	1	53	28.09	1	6	3	0.720783
1	1	1	67	44.89	1	6	2	0.567361
1	1	1	58	33.64	1	0	2	0.697507
0	1	1	75	56.25	1	9	2	0.959625
1	1	1	54	29.16	1	6	3	0.707486
1	1	1	61	37.21	1	0	3	0
1	1	1	60	36	1	0	2	0.809989
1	1	1	48	23.04	1	9	2	0.489688
1	1	1	68	46.24	1	0	2	0.660974
1	1	1	50	25	1	9	2	0.687759
1	1	1	50	25	1	0	3	0.265296
1	1	1	50	25	1	6	2	0.511705
1	1	1	36	12.96	1	9	6	0.514657
1	1	1	50	25	1	6	4	0.780173
1	1	1	30	9	0	9	3	0.674845
1	1	1	65	42.25	1	0	2	0.593552
1	1	1	60	36	1	9	2	0.785148
1	1	1	50	25	1	9	5	0.611859
1	1	1	50	25	1	12	3	0.956502
1	1	0	69	47.61	1	0	2	0.616173
0	0	1	50	25	1	0	5	1.07557
1	1	1	62	38.44	1	6	2	0.562474
1	1	1	47	22.09	1	9	3	0.714875
1	1	0	50	25	0	0	1	0.84458
1	1	1	58	33.64	1	0	2	0.917635
1	1	1	50	25	1	6	2	0.593055
1	1	0	50	25	1	9	4	0.907429
1	1	1	32	10.24	1	15	6	0.629898
1	1	1	50	25	1	0	2	0.862134
1	1	1	67	44.89	0	0	1	0.723367
0	0	1	50	25	1	6	2	0.874495
1	1	1	59	34.81	1	9	2	0.602836
1	1	1	48	23.04	1	9	3	0.677449
1	1	1	67	44.89	1	0	5	0.619501
1	1	0	50	25	1	0	2	0.766038
1	1	1	48	23.04	0	9	2	0.788302
1	1	0	75	56.25	0	0	3	0
0	0	1	50	25	1	12	2	1.01111
1	1	1	64	40.96	1	12	2	0.648496
1	1	1	50	25	1	6	3	0.617814
1	1	0	62	38.44	1	0	2	0.709405
1	1	1	50	25	1	9	2	0
1	1	1	43	18.49	1	9	3	0.741359
0	0	1	69	47.61	0	6	1	0.982314
1	1	1	32	10.24	1	9	5	0
1	1	1	46	21.16	1	6	3	0
1	1	0	50	25	0	0	1	0.581242
1	1	1	64	40.96	1	12	2	0.733513
1	1	0	78	60.84	1	9	2	0.599996
1	1	1	54	29.16	1	0	2	0.602836
1	1	1	70	49	0	0	1	0
1	1	1	66	43.56	1	0	2	0.883752
1	1	1	24	5.76	0	9	3	0.671858
1	1	0	50	25	0	0	3	0
1	1	1	35	12.25	1	16	6	0.744924
0	0	1	50	25	1	0	5	1.09483
1	1	0	65	42.25	1	0	2	0.724498
0	0	0	55	30.25	1	0	9	1.09542
1	1	0	56	31.36	1	9	2	0.607576
1	1	0	50	25	1	0	4	0.607576
1	1	0	50	25	0	6	4	0.815812
0	1	1	50	25	0	6	1	0.87041
0	1	0	81	65.61	0	6	1	0.874295
1	1	1	50	25	1	6	5	0.897668
1	1	0	54	29.16	1	6	3	0.550463
1	1	0	73	53.29	1	6	2	0.675301
1	1	0	55	30.25	1	9	5	0.880903
1	1	1	45	20.25	1	6	4	0.700914
1	1	1	50	25	1	0	3	0.700914
1	1	0	54	29.16	1	0	3	0
1	1	1	64	40.96	1	6	4	1
1	1	1	61	37.21	1	9	3	0.676454
1	1	0	32	10.24	1	9	3	0.755558
1	1	1	27	7.29	0	12	3	0.638875
1	1	1	27	7.29	0	12	1	0.638875
1	1	0	51	26.01	1	6	3	0.738623
1	1	1	35	12.25	1	12	4	0.789515
1	1	1	35	12.25	1	12	4	0.789515
1	1	1	64	40.96	1	9	2	0.462822
1	1	1	59	34.81	1	6	5	0
1	1	0	20	4	0	6	5	0.954661
1	1	0	70	49	1	0	2	0.786275
1	1	1	51	26.01	1	0	3	0.804339
1	1	1	53	28.09	1	0	4	0.487601
1	1	1	61	37.21	1	6	4	0.951937
1	1	0	50	25	1	0	5	0.858942
1	1	1	49	24.01	1	6	3	0.792695
1	1	1	30	9	1	15	2	0.605542
1	1	0	78	60.84	1	6	2	0.558337
1	1	0	51	26.01	1	6	3	0.5
1	1	0	50	25	0	15	1	0.5
1	1	0	46	21.16	0	6	4	0.625311
1	1	1	56	31.36	1	6	3	0
0	1	1	50	25	0	0	4	0.969914
1	1	1	49	24.01	1	6	5	0.787187
1	1	1	49	24.01	1	9	3	0.632496
1	1	1	70	49	1	6	5	0.878429
1	1	1	50	25	1	0	6	0
1	1	1	68	46.24	1	6	2	0.737311
1	1	1	68	46.24	1	0	2	0.73334
0	0	0	47	22.09	0	6	2	0.909146
1	1	1	22	4.84	0	12	5	0.653083
1	1	1	20	4	0	9	6	0
0	0	1	54	29.16	1	6	3	0.89888
0	1	1	77	59.29	0	6	1	0.968432
1	1	0	72	51.84	1	6	2	0.812159
1	1	1	61	37.21	0	0	1	0.957122
1	1	1	57	32.49	1	9	4	0.418572
1	1	1	27	7.29	1	0	5	0
0	0	1	71	50.41	1	0	2	1.03203
1	1	1	64	40.96	0	6	1	0
1	1	1	62	38.44	1	9	2	0
1	1	1	55	30.25	1	9	2	0.767498
1	1	1	22	4.84	0	15	5	0.468786
1	1	1	50	25	1	6	5	0.559232
1	1	1	50	25	1	6	3	0.619183
1	1	1	76	57.76	1	9	2	0.901877
1	1	1	63	39.69	1	6	2	0
1	1	0	32	10.24	1	15	7	0.846796
1	1	1	54	29.16	1	0	5	0.564857
1	1	1	42	17.64	1	9	3	0.625719
1	1	1	70	49	1	12	2	0.551639
1	1	0	50	25	1	9	3	0.619175
1	1	0	53	28.09	1	6	2	0.47857
1	1	1	47	22.09	1	9	3	0.774143
1	1	1	63	39.69	1	6	2	0.84388
1	1	0	65	42.25	1	6	2	0.733068
1	1	0	47	22.09	1	6	5	0
1	1	1	39	15.21	1	9	6	0.653871
1	1	0	37	13.69	1	6	4	0.776642
1	1	1	63	39.69	0	6	1	0.571761
1	1	0	61	37.21	1	9	4	0
1	1	1	50	25	1	6	3	0.804038
0	1	1	50	25	0	0	1	0.804038
1	1	1	48	23.04	1	6	2	0.782706
1	1	1	25	6.25	0	15	6	0
1	1	1	50	25	1	9	2	0.825257
1	1	1	58	33.64	1	6	6	0.649914
1	1	1	55	30.25	1	6	2	0.670073
1	1	1	67	44.89	1	0	3	0.718664
1	1	1	30	9	1	9	4	0.611322
1	1	1	53	28.09	1	6	4	0.666408
1	1	1	21	4.41	0	9	1	0.666408
1	1	1	50	25	0	12	3	0.755717
1	1	1	56	31.36	1	6	2	0
1	1	0	48	23.04	0	0	3	0.756964
1	1	0	65	42.25	1	6	6	0.737311
1	1	0	42	17.64	1	6	2	0
1	1	0	68	46.24	1	6	2	0
1	1	1	55	30.25	1	9	1	0
1	1	1	65	42.25	1	0	2	0.593167
1	1	1	47	22.09	1	9	3	0
1	1	0	36	12.96	1	9	6	0.8412
1	1	1	50	25	1	9	5	0.495424
1	1	1	65	42.25	1	0	4	0.724637
1	1	1	62	38.44	1	0	3	0.715917
1	1	1	50	25	1	9	7	0.725465
1	1	1	24	5.76	0	15	3	0.491657
1	1	1	46	21.16	1	6	4	0.5
1	1	1	52	27.04	1	9	6	0.738449
1	1	1	67	44.89	1	6	6	0.873956
1	1	1	63	39.69	0	12	1	0
1	1	1	50	25	0	0	2	0.892419
1	1	1	55	30.25	0	9	1	0
1	1	0	31	9.61	1	9	5	0.750585
1	1	0	34	11.56	1	9	3	0.750585
1	1	1	42	17.64	0	9	1	0.604551
1	1	0	35	12.25	1	9	2	0.616114
1	1	1	62	38.44	1	0	2	0.885749
1	1	0	50	25	1	9	5	0.681313
1	1	1	61	37.21	1	6	2	0.86002
1	1	0	30	9	1	15	5	0.746627
1	1	1	64	40.96	1	6	2	0.778486
1	1	1	50	25	1	0	2	0.58647
1	1	0	81	65.61	0	6	1	0.640415
1	1	0	83	68.89	1	6	2	0.71585
1	1	1	28	7.84	1	9	5	0.58647
0	1	1	63	39.69	1	6	2	1.09916
1	1	1	37	13.69	1	9	4	0.85125
1	1	1	65	42.25	0	0	1	0.940024
0	0	1	45	20.25	1	9	2	0.982246
1	1	0	63	39.69	1	12	2	0.627517
1	1	1	50	25	1	6	5	0.603759
1	1	0	52	27.04	1	6	4	0.782706
1	1	1	42	17.64	1	6	5	0.412788
1	1	0	47	22.09	1	6	2	0
1	1	0	74	54.76	1	0	2	1
1	1	0	72	51.84	1	15	2	0.6964
1	1	1	64	40.96	1	9	6	0.752386
1	1	0	50	25	1	6	3	0.804548
1	1	0	72	51.84	1	6	3	0.86928
1	1	1	72	51.84	1	0	5	0.711325
1	1	0	80	64	1	6	2	0.732724
0	1	0	50	25	0	0	2	1
1	1	0	59	34.81	1	9	3	0.682193
1	1	0	49	24.01	1	6	2	0.550463
1	1	1	70	49	1	6	5	0.826194
1	1	0	49	24.01	1	6	2	0
1	1	0	74	54.76	0	6	1	0
1	1	0	50	25	1	15	3	0.407906
1	1	1	37	13.69	1	12	5	0.826159
1	1	1	25	6.25	0	12	2	0.98684
1	1	1	49	24.01	1	9	4	0.677984
1	1	1	36	12.96	1	9	4	0.902747
1	1	1	69	47.61	0	6	2	0
1	1	0	28	7.84	0	16	3	0.734973
1	1	0	51	26.01	1	9	3	0.75
1	1	1	46	21.16	1	6	4	0.647463
1	1	0	67	44.89	1	0	5	0.605872
1	1	1	40	16	1	9	4	0.721838
1	1	1	67	44.89	1	9	3	0.868588
1	1	1	52	27.04	0	9	2	0.677486
1	1	1	55	30.25	1	15	3	0.637271
1	1	1	49	24.01	1	9	2	0.662686
1	1	1	25	6.25	1	12	3	0.840647
1	1	1	50	25	1	9	4	0.686622
1	1	0	50	25	0	0	5	0.660201
1	1	1	50	25	0	0	3	0.627517
1	1	1	46	21.16	1	9	4	0.837626
1	1	0	52	27.04	1	9	2	0.575937
1	1	1	54	29.16	1	9	2	0.641846
1	1	1	50	25	1	6	3	0.808439
1	1	1	50	25	0	16	4	0
1	1	1	77	59.29	0	0	6	0.85125
1	1	1	46	21.16	1	6	5	0.737311
1	1	1	58	33.64	0	9	2	0.567922
1	1	1	70	49	1	9	4	0.975772
1	1	1	43	18.49	1	9	4	0.825257
1	1	1	54	29.16	1	6	4	1.47501
1	1	1	54	29.16	1	6	3	0.821054
1	1	1	50	25	1	6	2	0.708244
1	1	1	28	7.84	1	16	1	0.708244
1	1	1	50	25	0	16	1	0.708244
1	1	1	50	25	1	12	5	0.81505
1	1	0	55	30.25	1	9	3	0.646291
1	1	1	56	31.36	1	9	3	0.924743
1	1	1	57	32.49	1	9	5	0.710727
1	1	1	32	10.24	1	9	2	0.710727
1	1	1	50	25	0	6	2	0
0	0	1	64	40.96	0	0	1	1.03333
1	1	0	61	37.21	1	12	2	0.961275
1	1	0	63	39.69	0	12	6	0.75
1	1	1	53	28.09	1	6	2	0.773459
1	1	1	50	25	1	9	4	0.666304
1	1	1	63	39.69	1	0	2	0.977074
1	1	1	63	39.69	1	0	6	0.705462
1	1	0	67	44.89	1	0	2	0.86002
1	1	1	50	25	1	9	5	0.709091
1	1	1	61	37.21	1	9	4	0.726341
0	0	0	74	54.76	1	9	2	1.17324
1	1	1	29	8.41	1	9	5	0
1	1	1	62	38.44	1	12	3	0.826194
1	1	1	33	10.89	0	6	4	0.712219
1	1	1	45	20.25	1	9	5	0.644725
1	1	1	71	50.41	1	0	2	0.897117
1	1	1	40	16	1	9	4	0.753801
1	1	0	62	38.44	0	6	2	0
1	1	0	34	11.56	1	9	3	0
1	1	1	56	31.36	0	0	2	0.767498
1	1	1	66	43.56	1	6	2	0.596568
1	1	1	15	2.25	0	9	3	0.826194
1	1	1	55	30.25	0	0	2	0.868342
1	1	0	38	14.44	1	9	3	0.539794
0	0	0	77	59.29	0	9	1	1.09532
1	1	1	55	30.25	0	6	3	0.784483
1	1	1	56	31.36	1	0	3	0.803764
1	1	1	50	25	0	0	5	0
1	1	1	59	34.81	1	0	3	0.806191
1	1	1	30	9	1	6	3	0.495424
0	1	0	41	16.81	1	9	2	0.93001
1	1	1	46	21.16	1	9	2	0.801419
1	1	1	56	31.36	1	6	2	0.719012
1	1	1	45	20.25	1	6	3	0.581716
1	1	0	50	25	0	0	2	1
1	1	1	33	10.89	1	6	6	0.539794
1	1	1	24	5.76	1	9	6	0.666307
1	1	1	48	23.04	1	9	4	0.786859
1	1	0	50	25	1	9	2	0.914602
0	1	1	61	37.21	1	0	2	0.921987
1	1	1	22	4.84	0	15	3	0.939634
1	1	1	49	24.01	1	6	2	0.702501
1	1	0	50	25	1	0	2	0.75
1	1	1	44	19.36	1	6	4	0
1	1	1	28	7.84	1	6	5	0.557052
1	1	1	61	37.21	1	0	5	0.819033
1	1	1	50	25	0	6	2	0.81815
1	1	1	52	27.04	1	0	2	0.446716
1	1	1	38	14.44	1	9	5	0.436702
1	1	1	64	40.96	1	0	2	0.767498
1	1	1	49	24.01	1	9	5	0.531379
1	1	1	44	19.36	1	9	5	0.904797
1	1	0	63	39.69	1	0	5	0.787502
1	1	0	60	36	1	9	2	0.808439
1	1	0	66	43.56	1	0	2	0.478917
1	1	1	50	25	0	0	2	0
1	1	1	65	42.25	1	0	2	0.99046
0	1	0	35	12.25	1	9	5	4.47712
1	1	0	82	67.24	1	6	2	0.932794
1	1	1	43	18.49	0	6	4	0.753539
1	1	0	52	27.04	1	0	3	0.76906
1	1	0	49	24.01	1	6	3	0
1	1	1	54	29.16	1	6	2	0.545702
1	1	1	58	33.64	1	9	2	0.553284
1	1	1	45	20.25	1	6	3	0.852216
1	1	0	50	25	1	6	3	0.864037
1	1	0	63	39.69	1	9	2	0.523623
1	1	0	64	40.96	1	0	1	0.523623
1	1	0	28	7.84	0	15	3	0.622073
1	1	0	47	22.09	0	9	3	0.555511
1	1	0	26	6.76	1	15	2	0.555511
1	1	1	25	6.25	0	16	4	0
1	1	1	64	40.96	1	9	2	0.75
1	1	1	50	25	0	0	3	0.97148
0	1	1	49	24.01	1	9	2	0.942062
1	1	1	26	6.76	1	9	6	0.920323
1	1	1	41	16.81	1	9	3	0.863815
0	0	1	50	25	1	0	2	1.3514
1	1	1	60	36	1	6	2	0.674743
1	1	1	48	23.04	1	9	4	0.690859
1	1	1	47	22.09	1	9	3	0.776642
1	1	1	65	42.25	1	0	5	0.574375
1	1	1	54	29.16	1	6	2	0.646291
1	1	0	50	25	1	12	3	0
0	0	1	64	40.96	1	0	2	1.12509
1	1	1	43	18.49	0	9	2	0
1	1	1	45	20.25	1	9	4	0.677627
1	1	1	31	9.61	1	0	6	0.986084
0	0	0	47	22.09	0	0	1	1.06382
1	1	1	50	25	1	9	4	0
1	1	1	38	14.44	1	9	3	0.646291
1	1	1	43	18.49	1	9	2	0.953553
1	1	1	37	13.69	1	9	5	0.86002
1	1	1	40	16	1	9	4	0
1	1	1	21	4.41	0	15	3	0.684898
1	1	1	22	4.84	0	12	3	0.718375
1	1	1	50	25	1	9	3	0.626823
1	1	1	50	25	1	9	2	0.626823
1	1	1	32	10.24	0	9	4	0.811037
1	1	1	46	21.16	0	12	3	0.539794
0	1	1	62	38.44	0	0	1	1.21621
1	1	1	63	39.69	1	6	2	0.805483
0	1	1	58	33.64	1	12	3	0.970951
0	0	1	31	9.61	1	9	5	0.963147
1	1	1	45	20.25	1	9	4	0.77986
1	1	1	35	12.25	1	9	5	0
1	1	1	50	25	0	16	3	0
1	1	1	39	15.21	1	9	7	0.790566
0	0	1	67	44.89	1	0	2	0.967141
1	1	1	42	17.64	1	6	3	0
1	1	1	21	4.41	1	12	4	1.0254
1	1	0	50	25	1	9	2	0.569311
1	1	1	31	9.61	1	9	5	0.953706
1	1	1	65	42.25	1	6	3	0
1	1	1	50	25	1	6	2	0.651882
1	1	1	18	3.24	0	9	3	0
1	1	1	50	25	0	0	5	0.892542
1	1	1	58	33.64	1	9	3	0.648894
1	1	1	78	60.84	1	6	2	0.7652
1	1	0	29	8.41	1	0	3	0.703815
1	1	1	74	54.76	1	6	2	0.814603
1	1	0	22	4.84	0	12	4	0
1	1	1	52	27.04	1	9	3	0.874295
1	1	0	36	12.96	0	9	4	0
1	1	1	50	25	0	0	2	0.739268
1	1	0	53	28.09	1	9	6	0.60497
1	1	1	50	25	1	9	4	0.804476
1	1	1	49	24.01	1	0	2	0
1	1	1	63	39.69	1	0	3	0.604632
1	1	1	37	13.69	1	9	6	0.739975
1	1	1	76	57.76	0	9	1	0.884895
1	1	1	51	26.01	1	6	3	0.536279
1	1	1	58	33.64	1	6	3	0.694088
1	1	1	59	34.81	1	9	2	0.651882
1	1	1	48	23.04	1	6	3	0
1	1	1	38	14.44	1	9	4	0
0	0	0	65	42.25	1	6	2	1.15713
1	1	1	50	25	0	0	3	0.819033
0	0	1	19	3.61	0	9	3	0.967035
1	1	1	53	28.09	1	0	2	0.547327
1	1	1	53	28.09	1	6	2	0.558193
1	1	1	50	25	0	9	1	0.558193
1	1	1	54	29.16	1	9	4	0.593955
1	1	1	39	15.21	1	9	3	0.638438
1	1	1	56	31.36	1	9	2	0.62565
1	1	1	51	26.01	1	12	3	0.58647
1	1	1	70	49	1	6	2	0.595807
1	1	1	39	15.21	1	9	4	0.538264
1	1	1	64	40.96	1	0	2	0
1	1	1	53	28.09	1	6	4	0.742279
1	1	1	49	24.01	1	9	3	0.557052
1	1	1	49	24.01	1	6	3	0.806278
0	1	1	24	5.76	0	15	1	0.806278
0	1	1	65	42.25	1	6	2	1
1	1	0	50	25	1	9	4	0.73077
1	1	0	64	40.96	1	6	2	0.662977
1	1	1	54	29.16	1	9	2	0.563047
1	1	0	46	21.16	1	6	3	0.727713
1	1	0	52	27.04	1	6	2	0.602836
1	1	0	40	16	1	12	4	0
1	1	0	36	12.96	1	9	6	0.660206
1	1	1	35	12.25	1	6	6	0.718375
1	1	1	50	25	1	6	4	0.707004
1	1	1	45	20.25	1	9	4	0.711908
1	1	1	42	17.64	1	15	3	0.533042
1	1	0	53	28.09	1	9	5	0.743105
1	1	1	66	43.56	1	0	6	0.734651
0	0	1	61	37.21	1	12	2	0.895424
1	1	0	50	25	0	6	3	0.862774
1	1	1	54	29.16	1	6	5	0.940184
1	1	0	28	7.84	1	12	5	0.672222
1	1	0	50	25	1	0	4	0.825397
1	1	1	64	40.96	1	6	2	0.670073
1	1	1	53	28.09	1	6	2	0.837378
1	1	1	50	25	1	0	3	0.737239
1	1	1	30	9	1	9	5	0.613933
1	1	1	43	18.49	1	9	4	0.711578
1	1	1	63	39.69	1	0	3	0.744058
1	1	1	68	46.24	1	0	5	0.627517
1	1	1	52	27.04	0	9	1	0
1	1	1	53	28.09	0	0	1	0.452663
1	1	1	38	14.44	1	9	5	0.730133
1	1	1	48	23.04	1	0	4	0.574375
1	1	1	28	7.84	1	9	5	0.697783
1	1	0	70	49	1	0	2	0.899206
1	1	0	53	28.09	1	6	2	0.826177
1	1	0	24	5.76	1	6	2	0
1	1	1	27	7.29	0	13	3	0.762858
1	1	1	35	12.25	1	9	3	0.962515
1	1	1	56	31.36	1	6	2	0.89338
0	0	1	70	49	1	6	5	1.19729
0	1	1	52	27.04	1	6	3	0.957623
1	1	1	72	51.84	1	0	2	0.928019
1	1	1	57	32.49	1	12	3	0.655877
1	1	0	44	19.36	1	6	4	0.619222
1	1	1	39	15.21	1	6	2	0.811037
1	1	1	52	27.04	1	0	4	0.590817
1	1	1	50	25	1	9	5	0.971751
1	1	1	63	39.69	0	0	5	0.635018
1	1	1	78	60.84	0	6	1	0
0	1	1	38	14.44	1	9	3	1.04402
1	1	0	64	40.96	1	0	2	0.775901
1	1	0	32	10.24	1	16	6	0.637746
1	1	1	43	18.49	1	0	5	0.824722
1	1	1	50	25	1	0	6	0.654943
1	1	0	55	30.25	1	6	4	0.538775
1	1	0	54	29.16	1	12	7	0.633981
1	1	1	52	27.04	1	0	5	0.739794
1	1	0	51	26.01	0	0	2	0.434588
0	1	0	50	25	0	0	5	1.01181
1	1	1	46	21.16	1	9	8	0.692227
1	1	1	24	5.76	1	9	5	0.69719
1	1	0	50	25	1	0	2	0.679506
1	1	0	62	38.44	1	0	4	0.808439
1	1	1	24	5.76	0	15	4	0.720954
1	1	1	23	5.29	0	9	5	0.862941
1	1	1	48	23.04	1	0	3	0.732954
1	1	1	31	9.61	0	0	2	0.756557
0	0	1	71	50.41	1	9	2	1.22178
1	1	1	49	24.01	1	0	2	0.673255
1	1	1	50	25	0	15	1	0.673255
1	1	1	66	43.56	1	6	8	0.959038
1	1	1	49	24.01	0	6	1	0.732259
1	1	1	32	10.24	0	12	3	0.637987
1	1	1	56	31.36	1	6	2	0.718375
1	1	1	63	39.69	1	9	3	0.770973
1	1	1	50	25	1	15	2	0.770973
1	1	1	50	25	0	0	4	0.905595
1	1	1	66	43.56	1	9	2	0.635074
1	1	0	50	25	0	16	3	0.625992
1	1	1	48	23.04	0	9	1	0
1	1	1	50	25	0	0	1	0
0	1	1	28	7.84	1	9	6	0.936999
1	1	0	36	12.96	0	9	5	0.737311
1	1	0	66	43.56	1	9	2	1.09385
0	1	1	59	34.81	1	0	2	0.863284
1	1	1	50	25	1	9	3	0.863284
1	1	1	36	12.96	0	9	4	0.772637
1	1	1	59	34.81	1	12	2	0.629357
1	1	1	50	25	1	0	4	0.698926
1	1	1	34	11.56	1	16	1	0.698926
1	1	0	46	21.16	1	0	4	0
1	1	0	69	47.61	1	9	2	0
1	1	1	54	29.16	1	0	2	0.615079
1	1	1	50	25	0	0	1	0.615079
1	1	1	65	42.25	1	0	4	0.656883
1	1	1	74	54.76	1	9	2	0.84147
1	1	1	50	25	0	0	2	0.882171
1	1	1	56	31.36	0	0	2	1.03477
1	1	1	50	25	0	0	2	0.762123
1	1	1	69	47.61	1	0	2	0.814774
1	1	1	54	29.16	1	6	3	0.533927
1	1	0	54	29.16	1	12	2	0.784344
1	1	0	50	25	1	9	3	0.776642
1	1	0	20	4	0	15	1	0.776642
1	1	1	59	34.81	1	0	2	0.602836
1	1	1	39	15.21	1	0	2	0.541129
1	1	1	53	28.09	1	9	4	0.638438
1	1	1	56	31.36	1	6	2	0.627517
1	1	1	40	16	1	6	4	0.573394
1	1	0	43	18.49	1	9	3	0
1	1	1	50	25	1	9	5	0.794328
1	1	1	30	9	1	0	3	0.794328
1	1	0	43	18.49	1	6	3	0.651882
1	1	0	18	3.24	0	15	1	0.651882
1	1	1	53	28.09	1	6	5	0.808439
1	1	0	49	24.01	1	6	2	0.697507
1	1	0	25	6.25	1	0	2	0.697507
0	1	0	50	25	0	0	2	0.837909
1	1	1	64	40.96	1	6	2	0.777619
1	1	0	44	19.36	1	0	4	0.858833
1	1	1	64	40.96	1	0	6	0.838465
0	1	1	39	15.21	1	9	2	0.838465
1	1	0	31	9.61	1	9	4	0.717294
1	1	1	34	11.56	1	6	3	0.763755
1	1	0	27	7.29	0	9	3	0.837488
1	1	0	30	9	1	6	3	0.837488
1	1	1	48	23.04	1	0	4	0.681313
1	1	0	65	42.25	1	0	2	0.790459
0	1	0	56	31.36	1	0	3	0.970951
1	1	1	38	14.44	0	9	4	0.893995
1	1	1	50	25	0	6	3	0.574375
1	1	0	40	16	1	9	3	0.527163
1	1	0	50	25	1	9	2	0.671185
1	1	0	50	25	1	0	3	0.744924
1	1	0	49	24.01	1	12	2	0
1	1	0	50	25	0	19	1	0
1	1	0	50	25	0	0	2	1.1042
1	1	0	60	36	1	9	5	0.638438
1	1	0	67	44.89	1	0	2	0.574207
1	1	0	50	25	1	6	7	0.721689
1	1	0	52	27.04	1	6	4	0.617814
1	1	0	43	18.49	1	0	3	0.666304
1	1	1	47	22.09	1	6	3	0.782706
1	1	1	80	64	0	0	1	0.782706
1	1	0	31	9.61	1	9	5	0.717294
1	1	0	54	29.16	1	6	2	0.767498
1	1	0	64	40.96	1	0	2	0.775751
1	1	0	30	9	1	6	5	0
1	1	1	45	20.25	1	6	6	0.708644
1	1	0	34	11.56	1	9	4	0.513953
1	1	0	44	19.36	1	9	4	0.805575
0	0	0	50	25	0	14	1	0.805575
1	1	0	39	15.21	1	9	5	0.670073
1	1	0	39	15.21	1	9	3	0.670073
1	1	1	84	70.56	0	0	1	1.01129
1	1	0	51	26.01	1	9	3	0.58647
1	1	1	76	57.76	0	0	1	0.834167
1	1	1	63	39.69	1	0	5	0.709181
1	1	1	50	25	0	0	2	0
1	1	0	50	25	1	9	3	0
1	1	1	39	15.21	1	12	4	0.782338
1	1	0	26	6.76	1	0	4	0.446716
1	1	0	50	25	0	0	7	0.886382
1	1	1	50	25	0	0	3	1.16698
1	1	1	50	25	1	6	5	0.654309
1	1	0	25	6.25	1	9	3	0.780132
1	1	0	49	24.01	1	6	3	0.810283
1	1	1	28	7.84	1	15	3	0.539794
1	1	0	50	25	1	9	2	3.69897
1	1	0	30	9	1	12	3	0.752095
1	1	1	50	25	0	0	6	0.426069
0	0	1	56	31.36	1	9	2	0.930931
1	1	1	64	40.96	1	6	2	0.690545
1	1	0	54	29.16	1	15	2	0.670147
1	1	1	50	25	1	15	2	0
1	1	1	51	26.01	1	0	3	0.620664
1	1	1	33	10.89	1	9	3	0.756979
1	1	0	62	38.44	1	12	1	0.723612
1	1	1	31	9.61	0	15	5	0.824211
1	1	1	68	46.24	1	9	2	0.652244
1	1	1	45	20.25	1	6	2	0.663883
0	0	1	55	30.25	1	12	4	1.02592
1	1	1	67	44.89	1	9	2	0.710995
1	1	1	39	15.21	1	9	5	0.71206
1	1	1	50	25	0	15	1	0.753313
1	1	0	60	36	1	12	2	0.787187
1	1	1	50	25	0	16	3	0.886382
1	1	0	28	7.84	1	16	4	0.58647
1	1	1	68	46.24	1	9	2	0.610564
1	1	1	78	60.84	1	0	4	0.797808
1	1	0	50	25	1	0	2	0
1	1	0	50	25	1	6	2	0.712406
1	1	1	69	47.61	1	0	2	0.701868
1	1	0	56	31.36	1	6	2	0.571245
1	1	0	66	43.56	0	9	1	0
1	1	0	49	24.01	1	9	4	0
1	1	1	48	23.04	0	6	5	0.704937
1	1	1	36	12.96	1	9	5	0.690807
1	1	1	64	40.96	1	0	5	0.702166
1	1	1	52	27.04	1	6	5	0.701237
1	1	1	49	24.01	1	0	3	0.690535
1	1	1	41	16.81	0	9	3	0.580373
1	1	1	63	39.69	1	0	3	0.850138
1	1	1	56	31.36	0	6	2	0
1	1	1	65	42.25	1	0	2	0.794023
1	1	1	67	44.89	1	0	3	0.825257
0	1	1	30	9	1	6	3	0.977965
1	1	1	50	25	1	9	3	0
1	1	1	66	43.56	1	0	2	0.930219
1	1	1	50	25	0	9	4	0.84388
1	1	1	24	5.76	0	12	4	0
1	1	0	60	36	0	9	2	0.627517
1	1	1	50	25	1	6	3	0.696236
1	1	0	41	16.81	1	6	5	0.489688
1	1	0	48	23.04	1	0	2	0.750585
0	0	1	82	67.24	0	0	1	1.18315
1	1	0	25	6.25	1	9	3	0.691496
1	1	0	40	16	1	0	6	0.934588
1	1	0	49	24.01	1	0	3	0.58647
1	1	0	63	39.69	1	0	2	0.767369
1	1	1	66	43.56	0	6	1	0.776642
1	1	0	62	38.44	1	12	2	0.737303
0	1	0	86	73.96	1	0	3	0.885515
0	0	0	80	64	0	0	1	0.964756
1	1	0	47	22.09	1	9	2	0
1	1	0	73	53.29	1	0	4	0
1	1	1	30	9	1	16	5	0.684194
1	1	0	46	21.16	1	6	3	0
1	1	0	72	51.84	1	6	2	0.698295
1	1	0	60	36	0	12	2	0.634251
1	1	0	50	25	0	0	2	0.826194
0	1	0	61	37.21	1	6	2	0.884321
1	1	1	45	20.25	1	6	4	0.775729
1	1	0	40	16	1	9	3	0.701847
1	1	0	81	65.61	1	0	2	0.787575
1	1	0	75	56.25	0	0	1	0.759233
0	1	0	69	47.61	1	9	2	0.85125
1	1	0	50	25	1	15	4	0.818285
1	1	0	43	18.49	1	12	3	0.724708
1	1	1	69	47.61	1	9	4	0.858833
1	1	1	40	16	0	6	5	0.585647
1	1	0	50	25	0	9	3	0.737311
1	1	0	50	25	0	9	2	0.586554
1	1	0	50	25	1	0	6	0.84388
1	1	1	50	25	1	9	2	0
1	1	1	73	53.29	1	6	2	0
0	1	1	50	25	1	6	2	0.783308
1	1	0	45	20.25	1	9	2	0
1	1	0	24	5.76	0	15	1	0
1	1	0	50	25	0	16	3	0.842015
1	1	1	85	72.25	0	0	1	0.687696
1	1	0	37	13.69	1	9	3	0.677937
1	1	0	65	42.25	1	6	2	0.677937
1	1	0	61	37.21	1	6	2	0.77181
0	1	0	63	39.69	0	0	2	0.999946
0	1	0	26	6.76	0	16	5	0.998399
1	1	1	45	20.25	1	9	3	0.489688
1	1	1	50	25	1	9	2	0
1	1	1	50	25	1	9	3	0
1	1	1	59	34.81	1	9	2	0.794928
1	1	1	30	9	1	9	6	0.612968
1	1	0	26	6.76	1	0	10	0
1	1	1	44	19.36	1	0	6	0.862543
1	1	0	33	10.89	1	12	6	0.804159
1	1	1	50	25	0	0	5	0.527163
1	1	0	50	25	0	0	3	0.701987
1	1	1	50	25	1	9	3	0.961996
1	1	0	50	25	1	9	10	0.791715
1	1	0	39	15.21	1	6	4	0
1	1	1	57	32.49	1	9	4	0.739689
0	0	0	50	25	1	9	3	1.21236
1	1	0	25	6.25	1	12	3	0.505216
1	1	1	35	12.25	1	15	5	0.790464
1	1	0	50	25	1	6	4	0.739794
1	1	1	27	7.29	0	16	6	0.761174
1	1	0	50	25	1	0	10	0
1	1	0	50	25	1	0	4	0.479029
1	1	0	64	40.96	1	9	4	0.479029
1	1	1	50	25	0	0	5	0.790459
0	0	1	24	5.76	1	0	6	0.959819
1	1	0	31	9.61	1	0	2	0.550463
1	1	0	37	13.69	1	9	4	0.730235
1	1	0	58	33.64	1	6	10	0.726617
1	1	1	45	20.25	1	9	6	0.701957
1	1	1	50	25	1	0	5	0.739794
1	1	1	29	8.41	1	6	10	0
1	1	0	50	25	1	0	10	0.690859
1	1	0	29	8.41	1	6	4	0.726642
1	1	1	21	4.41	1	9	7	0.563917
1	1	1	50	25	0	0	7	0.57404
1	1	1	50	25	1	12	7	0.780314
1	1	0	30	9	1	6	4	0.767498
1	1	1	64	40.96	1	12	6	0
1	1	0	50	25	0	0	3	0.739431
1	1	1	50	25	1	9	5	0.684553
1	1	1	50	25	1	9	4	0.684553
1	1	1	62	38.44	0	0	3	0.538915
1	1	0	24	5.76	1	9	4	0.788507
1	1	1	50	25	0	0	3	0.756688
0	1	0	31	9.61	1	9	2	0.85125
1	1	0	55	30.25	0	0	4	0.85125
1	1	1	50	25	1	9	3	0.790625
1	1	0	50	25	1	9	4	0.718787
1	1	0	33	10.89	1	6	4	0.713146
1	1	0	29	8.41	1	12	6	0.667935
1	1	0	30	9	1	12	6	0.689211
1	1	1	30	9	1	0	7	0.780492
1	1	0	33	10.89	1	9	5	0.488173
1	1	1	50	25	1	6	5	0.688329
1	1	0	50	25	1	9	5	0
1	1	1	61	37.21	0	0	5	0
1	1	0	50	25	0	0	5	0.58647
1	1	1	22	4.84	1	0	5	0.911117
1	1	1	26	6.76	1	0	3	0.649185
1	1	1	33	10.89	1	9	5	0.85125
0	1	0	50	25	0	0	5	0.912049
1	1	0	50	25	1	9	3	0.571044
1	1	0	50	25	1	9	2	0.722447
1	1	0	30	9	1	12	3	0.762609
0	1	0	39	15.21	1	9	3	0.872865
1	1	0	69	47.61	1	6	2	0.734999
1	1	1	56	31.36	1	0	2	0.719729
1	1	0	73	53.29	1	6	2	0.534459
0	0	1	88	77.44	0	0	1	0.697538
1	1	1	58	33.64	1	9	2	0.666304
1	1	0	29	8.41	0	15	3	0
1	1	0	72	51.84	1	0	2	0.636523
1	1	0	63	39.69	1	6	2	0.464199
1	1	0	41	16.81	1	9	5	0.453767
1	1	0	63	39.69	1	6	2	0.551969
1	1	0	75	56.25	1	6	2	0.811836
1	1	0	33	10.89	1	15	6	0.740106
0	1	0	50	25	1	9	2	0.820865
1	1	0	38	14.44	1	9	6	0.689824
1	1	0	71	50.41	0	6	1	0.629615
1	1	0	23	5.29	0	15	5	0.721637
0	0	0	39	15.21	1	15	4	0.92195
1	1	0	46	21.16	1	9	7	0.830491
1	1	0	50	25	0	9	3	0.653062
1	1	0	50	25	1	15	5	0.844746
1	1	0	42	17.64	1	9	5	0.76227
1	1	0	50	25	1	15	5	0.719729
1	1	0	50	25	1	9	5	0.709248
1	1	0	60	36	1	9	2	0.551538
1	1	0	68	46.24	1	0	3	0.722029
1	1	1	79	62.41	0	6	1	0.69009
1	1	0	42	17.64	1	9	4	0.821287
1	1	0	45	20.25	1	6	3	0.65842
1	1	0	70	49	1	6	5	0.689376
1	1	0	53	28.09	1	0	4	0.6
1	1	0	72	51.84	0	0	3	0.677757
1	1	0	50	25	0	0	1	0.632753
1	1	1	68	46.24	1	6	2	0.560888
1	1	0	71	50.41	1	6	2	0.584705
1	1	0	61	37.21	1	9	3	0.583174
0	1	0	32	10.24	1	15	4	0.811357
0	1	0	48	23.04	1	9	5	0.856561
1	1	0	64	40.96	1	6	5	0.52881
1	1	0	49	24.01	1	6	5	0.574888
1	1	0	52	27.04	0	6	2	0.773361
1	1	0	59	34.81	1	9	3	0.780314
0	1	1	72	51.84	1	9	2	0.91704
1	1	1	73	53.29	1	9	5	0.672523
1	1	0	74	54.76	1	9	3	0.563178
1	1	1	50	25	1	6	2	0.635272
1	1	1	50	25	1	9	5	0.457957
1	1	1	71	50.41	0	0	2	0.718375
1	1	0	55	30.25	1	6	2	0
1	1	0	50	25	0	0	1	0
1	1	1	48	23.04	1	12	1	0
1	1	0	64	40.96	1	0	1	0.785258
1	1	0	35	12.25	1	9	4	0.785258
1	1	1	72	51.84	0	0	2	0.847895
1	1	1	54	29.16	1	6	2	0.603434
1	1	1	41	16.81	1	9	5	0.678356
1	1	1	70	49	1	0	6	0.766627
1	1	1	22	4.84	0	12	3	0.572978
1	1	1	24	5.76	1	15	2	0.572978
1	1	1	43	18.49	1	16	5	0.687643
1	1	1	50	25	0	0	6	0.551512
1	1	1	45	20.25	1	6	6	0.626916
1	1	0	28	7.84	1	9	7	0.331932
1	1	1	22	4.84	0	0	6	0.635475
1	1	1	50	25	0	16	3	0.635218
1	1	0	50	25	1	12	3	0.748646
1	1	0	50	25	0	0	1	1.05334
1	1	0	49	24.01	1	12	3	0.615836
1	1	1	59	34.81	1	6	6	0.686932
1	1	1	50	25	0	0	3	0.627517
1	1	1	62	38.44	1	6	2	0.73141
1	1	0	50	25	0	0	6	0.707131
1	1	1	50	25	0	0	7	0.646623
1	1	0	74	54.76	1	6	3	0.74769
1	1	0	50	25	0	0	4	0.825257
1	1	0	63	39.69	1	9	7	0.644716
1	1	0	50	25	0	0	3	0.646686
0	0	0	62	38.44	1	0	2	0.936999
1	1	0	50	25	0	9	4	0.566602
1	1	0	49	24.01	1	6	5	0.53541
1	1	0	70	49	1	6	2	0
1	1	0	47	22.09	1	9	3	0.709169
1	1	0	42	17.64	1	9	3	0.536727
1	1	0	44	19.36	1	9	3	0.634311
1	1	0	25	6.25	0	12	3	0.429924
1	1	0	45	20.25	1	15	5	0.505571
0	1	0	74	54.76	1	12	2	0.815803
1	1	0	30	9	1	15	5	0.694704
1	1	0	45	20.25	1	12	3	0.611859
1	1	1	72	51.84	1	0	2	0.797925
1	1	0	22	4.84	0	16	1	0.611859
1	1	0	37	13.69	1	15	5	0.754083
1	1	0	31	9.61	1	12	5	0.772725
1	1	0	26	6.76	1	16	5	0.529893
1	1	1	29	8.41	1	15	6	0.614545
1	1	0	38	14.44	1	12	6	0.7173
0	0	0	40	16	1	9	4	1.01215
1	1	0	42	17.64	0	9	3	0.644429
1	1	0	31	9.61	0	12	3	0.635218
1	1	0	35	12.25	1	9	5	0.753861
1	1	0	55	30.25	1	9	5	0.555768
1	1	0	64	40.96	1	0	2	0.593955
1	1	0	52	27.04	1	12	3	0.560865
1	1	0	73	53.29	1	0	2	0.560865
1	1	0	24	5.76	0	12	4	0.451456
1	1	0	55	30.25	1	9	3	0.584301
1	1	0	51	26.01	1	0	3	0
1	1	0	63	39.69	1	6	2	0.815405
0	1	0	66	43.56	1	0	2	0.777283
1	1	1	43	18.49	1	9	5	0.686294
1	1	0	50	25	1	9	4	0.607965
1	1	1	47	22.09	1	12	4	0.562335
1	1	1	55	30.25	1	9	5	0.738875
1	1	0	50	25	1	6	4	0.617623
1	1	1	41	16.81	1	9	5	0.61789
1	1	0	51	26.01	1	9	6	0.648312
1	1	0	33	10.89	1	16	5	0.629424
1	1	0	52	27.04	1	6	2	0.642801
1	1	0	33	10.89	1	12	8	0.496923
1	1	0	86	73.96	1	0	2	0.752098
1	1	1	49	24.01	1	9	4	0.824988
1	1	1	47	22.09	1	6	3	0.552589
1	1	0	81	65.61	1	6	2	0.951815
1	1	0	71	50.41	1	6	3	0.64365
1	1	0	50	25	0	0	2	0
1	1	0	23	5.29	1	12	4	0.64365
0	0	1	38	14.44	1	9	5	0.956857
1	1	1	39	15.21	1	12	6	0.649361
1	1	0	62	38.44	0	9	2	0.684056
1	1	1	36	12.96	1	15	4	0.673655
1	1	1	50	25	1	6	2	0.850854
1	1	1	32	10.24	1	9	7	0.655759
1	1	1	50	25	1	9	2	0.685234
1	1	1	71	50.41	1	6	2	0.622694
0	0	1	49	24.01	1	9	4	0.967035
1	1	0	56	31.36	1	9	2	0
1	1	0	27	7.29	0	16	1	0
1	1	0	59	34.81	1	0	2	0.638438
0	1	0	50	25	1	6	2	0.734119
1	1	0	50	25	0	15	4	0.734119
1	1	0	30	9	0	9	3	0.93001
1	1	0	65	42.25	1	0	2	0.6
1	1	1	57	32.49	0	12	2	0.451328
1	1	0	36	12.96	1	0	6	0.686237
1	1	1	53	28.09	1	9	3	0.574332
1	1	1	70	49	0	0	1	0.75304
1	1	0	27	7.29	0	16	4	0.690859
1	1	0	49	24.01	1	9	2	0.688671
1	1	0	50	25	1	6	5	0.551941
0	1	0	53	28.09	1	9	3	0.863598
1	1	0	43	18.49	1	9	3	0.564857
0	0	0	50	25	0	0	3	1.18257
1	1	0	71	50.41	0	0	4	1
1	1	0	69	47.61	0	0	4	0.696367
1	1	0	82	67.24	0	6	2	0.763735
1	1	1	53	28.09	1	0	2	0.564857
1	1	1	50	25	0	0	1	0.564857
1	1	0	59	34.81	1	9	2	0.776642
1	1	0	27	7.29	0	16	3	0.550463
1	1	0	52	27.04	1	9	6	0.463169
1	1	0	27	7.29	0	16	4	0.365183
0	1	0	44	19.36	1	16	6	0.878399
1	1	1	54	29.16	0	0	1	0.537012
1	1	1	24	5.76	0	16	1	0.537012
1	1	0	57	32.49	1	9	2	0.6
1	1	0	55	30.25	1	12	2	0.673255
1	1	0	50	25	1	0	2	0.684583
1	1	1	50	25	1	6	4	0.741292
1	1	0	50	25	1	9	2	0.64442
1	1	1	53	28.09	1	9	4	0.673887
1	1	0	32	10.24	1	15	5	0.768665
0	1	0	43	18.49	1	9	6	0.898221
0	1	0	50	25	1	12	2	0.814032
1	1	0	50	25	1	0	3	0.814032
1	1	1	50	25	1	9	2	0.670073
1	1	1	51	26.01	1	9	4	0.756826
1	1	0	78	60.84	1	0	3	0.89766
1	1	1	56	31.36	0	0	1	0.679425
0	0	0	65	42.25	1	0	2	0.981923
1	1	0	49	24.01	1	6	2	0.709181
1	1	0	47	22.09	1	9	2	0.815974
1	1	1	27	7.29	1	16	2	0.624431
1	1	0	41	16.81	1	9	6	0.714497
1	1	0	50	25	1	15	4	0.71458
1	1	0	34	11.56	1	15	5	0.762609
1	1	0	49	24.01	1	0	3	0.695903
1	1	0	39	15.21	1	9	5	0.837144
1	1	0	67	44.89	1	6	6	0.578311
1	1	0	50	25	1	12	8	0.76114
1	1	1	50	25	1	0	5	0.691345
1	1	0	51	26.01	1	0	5	0.655933
1	1	0	41	16.81	1	15	4	0.631118
1	1	0	49	24.01	1	9	4	0.595074
1	1	0	26	6.76	1	9	5	0.674539
1	1	0	50	25	1	15	6	0.607772
1	1	0	36	12.96	1	12	6	0.61789
1	1	0	53	28.09	1	6	3	0.446716
1	1	0	50	25	0	0	3	0.75
1	1	1	46	21.16	1	6	6	0.68473
1	1	0	33	10.89	1	12	6	0.593087
1	1	0	31	9.61	0	15	3	0.528879
1	1	1	50	25	1	0	6	0.619613
1	1	0	36	12.96	1	9	3	0.666021
1	1	0	50	25	0	0	1	0.501745
0	0	0	45	20.25	1	6	3	0.76701
1	1	1	78	60.84	0	0	1	0.825257
1	1	1	72	51.84	1	0	2	0.483415
1	1	1	39	15.21	1	9	3	0.76902
1	1	1	40	16	1	9	3	0.386392
1	1	1	71	50.41	0	0	1	0.655644
1	1	0	50	25	0	16	3	0.509139
1	1	1	51	26.01	1	0	6	0.79779
1	1	0	47	22.09	1	6	4	0
1	1	1	55	30.25	1	9	10	0.565928
1	1	0	50	25	0	12	4	0.637746
1	1	1	51	26.01	1	0	3	0.5
1	1	0	41	16.81	1	9	6	0.52901
1	1	0	33	10.89	1	9	3	0.660206
1	1	0	38	14.44	1	0	5	0.893497
1	1	0	47	22.09	1	6	3	0
0	0	1	68	46.24	0	0	1	0.975517
1	1	1	70	49	1	0	2	0.86928
1	1	1	64	40.96	1	0	3	0.806667
1	1	1	61	37.21	1	0	8	0.838976
0	1	1	50	25	0	0	3	0.838976
1	1	1	35	12.25	1	9	6	0.556973
1	1	1	67	44.89	0	0	1	0.565526
1	1	1	50	25	1	12	5	0.574855
1	1	1	67	44.89	0	0	1	0.658043
1	1	1	75	56.25	1	6	2	0
1	1	1	50	25	1	0	2	0.655877
1	1	1	74	54.76	1	0	6	0.897408
1	1	0	50	25	1	0	3	0.769795
0	0	1	66	43.56	1	0	1	0.883211
0	1	1	75	56.25	1	0	2	0.970848
1	1	1	42	17.64	1	6	4	0.650851
1	1	1	48	23.04	1	9	4	0.627588
1	1	1	66	43.56	1	0	2	0.740477
1	1	0	73	53.29	0	0	2	0
1	1	1	72	51.84	1	9	3	0.534995
1	1	1	50	25	0	0	1	0.605542
1	1	1	50	25	1	0	5	0.608364
1	1	1	50	25	1	6	5	0.608364
1	1	0	50	25	0	16	3	0.726621
1	1	0	49	24.01	1	0	6	0.787859
1	1	0	50	25	1	6	3	0.673255
1	1	0	50	25	0	6	2	0
1	1	1	50	25	1	16	3	0.524466
1	1	1	50	25	1	6	2	0.725763
1	1	0	52	27.04	1	9	7	0.605049
1	1	1	66	43.56	1	0	4	0.801277
1	1	1	50	25	1	9	5	0.656326
1	1	0	53	28.09	1	9	4	0.574375
1	1	0	40	16	1	0	3	0.684383
1	1	0	33	10.89	1	12	6	0.615665
1	1	1	50	25	0	0	6	0.614868
1	1	1	50	25	1	0	3	0.766117
1	1	0	50	25	1	12	8	0.652777
1	1	0	28	7.84	1	16	1	0.652777
1	1	0	34	11.56	1	0	6	0.768449
1	1	1	50	25	1	0	2	0.518379
1	1	1	63	39.69	1	6	6	0.974226
1	1	1	50	25	1	6	4	0.784771
1	1	0	63	39.69	1	6	2	0.681313
1	1	0	50	25	1	6	5	0.506381
1	1	0	54	29.16	1	9	2	0.609738
1	1	0	56	31.36	1	9	2	0
1	1	0	50	25	1	0	5	0.837187
1	1	1	50	25	0	0	4	0.751843
1	1	1	46	21.16	1	6	5	0.755471
1	1	1	42	17.64	1	0	4	0.660201
1	1	0	33	10.89	1	9	4	0.574375
1	1	1	50	25	1	12	4	0.734168
1	1	1	51	26.01	1	15	3	0.550463
1	1	0	43	18.49	1	9	5	0.92607
1	1	1	39	15.21	1	16	5	0.727713
1	1	1	59	34.81	1	12	2	0.573394
1	1	1	50	25	1	6	2	0.814468
1	1	0	50	25	1	0	2	0.883211
1	1	1	50	25	0	6	3	0.599593
1	1	0	24	5.76	0	12	3	0.665544
1	1	0	65	42.25	1	6	2	0.589541
1	1	1	50	25	1	6	2	0.632969
1	1	1	50	25	1	9	4	0.782108
1	1	1	28	7.84	1	9	6	0.879913
0	0	1	50	25	0	0	1	0.879913
1	1	1	50	25	1	0	3	0
1	1	1	28	7.84	1	15	5	0.625316
0	0	1	50	25	0	0	1	1.1265
1	1	0	53	28.09	1	6	7	0
1	1	0	40	16	1	6	6	0.738753
1	1	0	50	25	1	9	2	0
1	1	0	50	25	1	9	3	0
1	1	0	33	10.89	1	6	6	0.466377
1	1	0	66	43.56	1	6	2	0.819341
1	1	0	38	14.44	1	6	6	0.703939
1	1	0	31	9.61	1	9	3	0.720529
1	1	0	53	28.09	1	9	5	0.720529
1	1	1	51	26.01	1	6	3	0.553694
1	1	0	42	17.64	1	6	5	0.856623
1	1	0	41	16.81	1	0	6	0.695169
0	1	1	74	54.76	1	0	2	0.993101
0	0	0	50	25	1	0	6	0.7418
1	1	1	61	37.21	1	0	13	0.522492
1	1	0	61	37.21	1	0	5	0.557375
1	1	1	61	37.21	1	6	2	0.570564
1	1	0	50	25	1	6	4	0
1	1	0	62	38.44	1	6	1	0.71269
0	1	0	50	25	1	0	3	0.811571
1	1	0	50	25	1	14	4	0.660206
1	1	0	50	25	1	14	2	0.660206
1	1	0	34	11.56	1	9	2	0.660206
1	1	0	50	25	1	0	4	0.8
1	1	0	30	9	1	9	4	0.8
1	1	0	44	19.36	1	6	4	0
1	1	0	71	50.41	1	6	2	0.845403
1	1	0	42	17.64	1	12	4	0.466791
1	1	1	50	25	1	9	7	0.570725
1	1	0	37	13.69	1	9	5	0.741023
1	1	0	45	20.25	1	6	4	0.45997
1	1	0	50	25	0	0	3	0.741572
0	1	0	35	12.25	1	9	5	0.930728
1	1	0	41	16.81	1	0	9	0.727713
1	1	0	69	47.61	1	6	2	0.856793
1	1	0	30	9	1	0	4	0.868655
1	1	0	33	10.89	1	6	5	0.786034
1	1	0	50	25	1	6	4	0.69029
1	1	0	50	25	0	0	4	0.582963
1	1	0	50	25	1	12	5	0.539794
1	1	0	50	25	1	12	5	0.539794
1	1	0	50	25	1	12	1	0.625343
1	1	1	50	25	0	12	7	0.586194
1	1	0	61	37.21	1	0	4	0.848565
1	1	0	56	31.36	1	6	4	0.897781
1	1	0	54	29.16	1	9	2	0.801109
1	1	1	46	21.16	0	9	4	0.86002
1	1	0	77	59.29	1	0	2	0.848869
1	1	0	68	46.24	1	6	3	0.997141
1	1	0	50	25	1	12	5	0.622715
1	1	0	74	54.76	0	0	5	0
1	1	0	50	25	1	0	5	0.825257
1	1	0	55	30.25	0	6	5	0.527163
1	1	0	57	32.49	1	9	2	0.6
1	1	0	31	9.61	1	15	2	0.6
0	1	0	56	31.36	1	6	2	0.87942
1	1	0	48	23.04	1	0	3	0.720774
1	1	0	35	12.25	1	6	4	0.869176
1	1	0	64	40.96	1	6	2	0.871702
1	1	1	65	42.25	1	6	2	0.878429
1	1	0	78	60.84	0	0	2	0.79898
1	1	1	28	7.84	0	9	3	0.737311
1	1	0	71	50.41	1	0	7	0.929537
[truncated: 3,755 more rows]

## Sheet: 2014 survey
vep1	vep2	GTP	Age	Age2_	Male	Year_edu	Fam_size	E_health
1	1	1	30	9	1	6	7	0.653046
1	1	0	50	25	0	0	4	2.30103
1	1	0	51	26.01	1	6	3	0.607968
1	1	1	28	7.84	1	6	5	0.900554
1	1	1	42	17.64	1	0	3	0.567685
0	1	1	73	53.29	1	0	3	1.34109
1	1	0	50	25	0	0	3	0.746627
1	1	1	50	25	0	0	3	0.636499
1	1	0	33	10.89	1	9	3	3.90309
1	1	1	26	6.76	0	12	4	0.675346
1	1	0	50	25	0	0	4	0.697507
1	1	1	25	6.25	1	9	3	0.598547
1	1	0	37	13.69	1	12	5	0.879171
1	1	1	28	7.84	1	0	4	0.531111
1	1	1	53	28.09	1	6	7	0.531111
1	1	0	40	16	1	0	6	0.750317
1	1	1	29	8.41	1	0	4	3.17609
1	1	1	23	5.29	1	12	5	0.654785
0	1	1	30	9	1	9	3	0.929114
0	1	0	28	7.84	1	9	3	0.977468
0	1	1	27	7.29	1	9	6	0.923852
1	1	0	29	8.41	1	9	10	3
1	1	0	50	25	0	0	3	0.560606
1	1	1	75	56.25	0	0	3	0.590061
1	1	1	50	25	1	15	4	0.592016
1	1	0	31	9.61	1	0	3	0.828906
1	1	1	63	39.69	1	0	6	0.563587
1	1	0	50	25	0	0	4	0.405002
1	1	0	65	42.25	1	0	2	0.651226
1	1	0	65	42.25	1	0	2	0.773675
1	1	0	65	42.25	1	0	2	0.780303
1	1	0	65	42.25	1	0	2	0.9043
1	1	0	50	25	0	0	5	0.569359
1	1	0	54	29.16	0	6	2	0.587836
1	1	0	36	12.96	1	9	5	0.761997
1	1	0	31	9.61	0	16	3	0.737147
1	1	1	50	25	1	6	4	0.748151
1	1	0	66	43.56	1	9	6	0.608717
1	1	0	60	36	1	6	3	0.666174
1	1	1	62	38.44	1	9	2	0.611788
1	1	0	51	26.01	1	6	3	0
1	1	1	50	25	0	9	3	0.689595
1	1	1	44	19.36	1	9	6	0.833928
1	1	0	40	16	0	12	2	0
1	1	0	66	43.56	1	6	2	0.461844
1	1	0	38	14.44	1	12	4	0.461844
0	1	0	81	65.61	1	0	2	1.11319
1	1	1	29	8.41	1	12	7	0.732953
0	0	1	42	17.64	1	9	4	0.940287
1	1	1	31	9.61	1	9	6	4.07918
1	1	1	38	14.44	0	9	3	0.69333
1	1	1	53	28.09	1	6	5	0.567029
1	1	1	26	6.76	1	12	3	0.719362
1	1	1	29	8.41	1	0	4	0
1	1	0	33	10.89	1	0	4	3.30103
1	1	0	52	27.04	1	6	4	0.664714
1	1	0	38	14.44	1	9	7	0.750317
1	1	0	31	9.61	1	0	4	2.60206
1	1	0	30	9	1	9	4	0.620522
1	1	0	27	7.29	1	9	2	0.717294
1	1	0	54	29.16	1	12	3	0
1	1	0	62	38.44	1	9	5	0
1	1	1	49	24.01	0	6	2	0.783624
1	1	0	44	19.36	1	9	3	0
0	1	0	68	46.24	1	9	3	0.910055
0	0	1	50	25	0	9	3	0.997162
1	1	0	50	25	0	0	3	3.30103
1	1	0	64	40.96	1	0	3	0.671067
1	1	1	50	25	0	0	2	0.821796
1	1	1	50	25	0	9	4	0.89572
1	1	1	61	37.21	1	6	2	0.816721
1	1	0	30	9	1	9	4	0.627858
1	1	1	48	23.04	1	9	5	0.899518
1	1	1	50	25	1	6	4	3.69897
1	1	0	42	17.64	1	15	7	0.951751
1	1	0	41	16.81	1	9	6	0.97148
1	1	1	50	25	1	9	6	0.72946
1	1	1	50	25	1	0	2	0.666408
1	1	1	50	25	1	9	6	0.991024
1	1	1	50	25	1	9	6	3.8451
1	1	1	20	4	0	12	5	0.819793
1	1	1	45	20.25	1	12	3	0.703882
1	1	0	43	18.49	1	6	8	3.8451
1	1	1	50	25	0	0	6	0.745843
0	0	1	62	38.44	1	9	2	1.06541
1	1	1	59	34.81	1	9	6	0.827825
1	1	1	58	33.64	1	9	6	0.733148
1	1	1	30	9	0	6	4	0.777039
1	1	0	50	25	1	6	5	4.30103
0	0	0	25	6.25	0	9	1	4.30103
1	1	0	63	39.69	1	0	6	0
1	1	1	33	10.89	1	9	6	0.748333
1	1	0	38	14.44	1	12	4	3.30103
1	1	1	37	13.69	1	9	7	0.830896
1	1	1	32	10.24	1	0	8	0.700705
1	1	0	37	13.69	0	9	3	0.694088
1	1	1	31	9.61	1	9	6	1.23315
1	1	1	80	64	0	9	6	0.686539
1	1	1	32	10.24	1	9	7	0.587553
1	1	1	50	25	1	6	6	0.799124
1	1	1	44	19.36	1	0	2	0.544004
1	1	1	36	12.96	0	9	3	0.672655
1	1	1	50	25	0	0	2	0.803418
1	1	1	46	21.16	1	6	6	1.02909
1	1	1	50	25	1	12	5	0.748085
1	1	1	45	20.25	1	9	4	0.879663
1	1	1	19	3.61	0	9	3	0.85086
1	1	0	50	25	0	16	4	0.679506
1	1	1	54	29.16	1	0	4	0.860367
1	1	1	29	8.41	1	9	4	0.860367
1	1	1	50	25	1	12	8	0.850985
1	1	1	60	36	1	12	2	0.561613
1	1	1	61	37.21	0	0	1	0.731385
1	1	1	43	18.49	1	12	6	0.955327
1	1	1	52	27.04	1	0	6	0.771729
1	1	0	30	9	1	9	4	0.858833
1	1	0	50	25	0	6	3	0.42182
1	1	1	37	13.69	1	9	6	0.836262
1	1	0	50	25	1	9	6	0.701028
1	1	1	60	36	1	9	2	0.692642
0	0	1	69	47.61	1	6	2	1.35015
1	1	1	51	26.01	1	0	4	0.818625
1	1	0	46	21.16	1	6	6	1.15293
1	1	1	29	8.41	0	9	3	0.692647
1	1	1	32	10.24	1	15	5	0.717474
1	1	0	49	24.01	1	6	5	0.618396
1	1	0	42	17.64	1	6	5	0.6
1	1	0	50	25	1	9	5	0.690854
1	1	1	54	29.16	1	9	2	0.92329
1	1	1	30	9	1	0	4	0.608577
1	1	1	61	37.21	1	9	4	0.594289
1	1	1	50	25	0	0	8	0.702956
1	1	1	31	9.61	1	9	6	0.886645
1	1	1	49	24.01	1	6	4	0.503706
1	1	1	50	25	1	0	7	0.931374
1	1	1	50	25	1	12	5	0.724259
1	1	1	50	25	1	12	5	0.724259
1	1	1	52	27.04	1	9	3	0.55267
1	1	1	46	21.16	1	6	4	0.665677
0	0	1	63	39.69	1	0	2	1.04657
1	1	1	50	25	0	0	1	0
1	1	0	60	36	1	9	4	0.828906
1	1	0	64	40.96	1	9	3	0.888554
1	1	0	52	27.04	0	9	1	0
0	0	1	64	40.96	1	0	2	0.97723
1	1	1	54	29.16	1	6	2	0.672737
1	1	0	65	42.25	1	0	2	0.754503
0	1	1	66	43.56	0	6	1	0.888787
1	1	1	61	37.21	1	9	6	0.637987
1	1	0	75	56.25	1	0	2	0.685362
1	1	0	55	30.25	1	9	4	0.439069
1	1	0	50	25	0	0	1	0.439069
1	1	1	74	54.76	1	0	2	0.883207
1	1	1	47	22.09	1	9	5	0.521851
1	1	1	61	37.21	1	0	2	0.714363
1	1	1	78	60.84	1	9	2	0.860098
1	1	1	50	25	0	0	4	0.860098
1	1	1	50	25	0	0	1	0.862751
1	1	1	50	25	1	6	4	0.615541
1	1	1	26	6.76	1	12	8	0.709075
1	1	1	65	42.25	1	0	5	0.934197
1	1	1	61	37.21	1	0	5	0.811503
1	1	1	49	24.01	1	6	2	0.724697
1	1	1	44	19.36	1	9	4	0.578474
1	1	1	50	25	1	9	8	0.72402
1	1	0	70	49	1	15	2	0.724499
1	1	1	38	14.44	0	6	6	0.558792
1	1	0	51	26.01	1	6	8	0.718787
1	1	1	45	20.25	1	6	5	0.669244
1	1	1	66	43.56	1	0	6	0.824729
1	1	1	50	25	1	9	5	0.439586
0	0	1	50	25	0	0	2	1.02358
0	0	1	31	9.61	1	12	6	1.07021
1	1	1	50	25	1	12	5	0
1	1	1	63	39.69	1	9	3	0.607965
1	1	0	50	25	1	9	3	2.30103
1	1	1	47	22.09	1	9	3	0.667327
1	1	1	50	25	1	0	2	0.667327
1	1	1	60	36	1	12	2	0.787502
1	1	1	31	9.61	1	6	4	0.787502
1	1	1	39	15.21	1	6	6	1.07789
1	1	1	35	12.25	1	9	4	1.03724
1	1	1	69	47.61	1	6	2	0.77835
1	1	1	78	60.84	1	9	2	1.06815
1	1	0	40	16	1	6	4	3.47712
1	1	0	30	9	1	9	4	0.715917
1	1	1	30	9	1	9	5	0.881568
1	1	1	50	25	0	0	1	1.16981
1	1	0	50	25	1	0	4	0
1	1	0	45	20.25	1	6	2	3.47712
1	1	1	37	13.69	1	6	6	0.562147
1	1	1	73	53.29	1	6	2	0.722346
1	1	1	72	51.84	1	9	2	0.870114
1	1	1	71	50.41	1	9	2	0.644556
1	1	1	66	43.56	1	6	3	0.801555
1	1	1	36	12.96	1	12	5	0.72121
1	1	1	50	25	1	6	3	0.72121
1	1	1	65	42.25	1	6	2	0.524763
1	1	1	50	25	0	0	1	1.01565
1	1	1	32	10.24	1	6	4	0.736744
1	1	1	44	19.36	1	6	4	0.542393
1	1	1	44	19.36	1	9	4	0
1	1	1	53	28.09	1	6	2	2.30103
1	1	1	27	7.29	0	9	4	0
1	1	1	41	16.81	1	6	5	0.513277
1	1	1	67	44.89	1	0	3	0.521863
1	1	1	50	25	1	0	3	0.521863
1	1	1	50	25	1	9	8	0.535234
1	1	1	50	25	1	9	1	0.535234
1	1	0	50	25	0	0	2	0.604985
1	1	0	39	15.21	1	9	5	0.748659
1	1	1	50	25	1	12	4	0.779621
1	1	0	50	25	1	15	3	0.653972
1	1	1	59	34.81	1	12	5	0.803386
1	1	1	31	9.61	1	16	7	0.747376
1	1	1	54	29.16	1	9	2	0.859073
1	1	0	32	10.24	1	9	2	3.60206
1	1	1	50	25	0	16	6	0.595841
1	1	1	69	47.61	0	0	2	1.19332
1	1	1	50	25	1	0	6	0.849912
1	1	0	38	14.44	1	9	4	0.551876
1	1	1	54	29.16	1	9	2	0.575558
1	1	1	65	42.25	1	6	6	0.576773
0	0	1	55	30.25	1	9	3	1.19228
1	1	1	51	26.01	1	9	2	1.13606
1	1	1	48	23.04	1	9	3	0
1	1	1	48	23.04	1	9	2	0
1	1	1	50	25	1	9	2	0.653207
1	1	1	71	50.41	1	9	2	0.68107
1	1	1	28	7.84	1	9	5	0.764763
1	1	1	33	10.89	1	9	8	0.586163
1	1	1	65	42.25	1	6	2	0.704843
1	1	1	18	3.24	0	12	3	0.329503
1	1	1	64	40.96	1	0	2	0.535813
1	1	1	61	37.21	1	9	2	0.356133
1	1	1	45	20.25	1	9	5	0.527751
1	1	0	50	25	1	12	3	0.565721
1	1	1	37	13.69	1	6	4	0.641542
1	1	1	48	23.04	1	9	3	0.575265
1	1	1	42	17.64	0	6	4	0.538639
1	1	1	36	12.96	1	9	4	1.57341
1	1	1	71	50.41	0	6	1	0.896717
1	1	1	25	6.25	1	6	7	0.738796
1	1	1	36	12.96	1	9	4	0.82464
1	1	1	52	27.04	1	6	5	0.667595
1	1	0	41	16.81	1	9	4	0.641194
1	1	1	51	26.01	1	0	2	0.69612
1	1	1	50	25	1	6	4	0.69612
1	1	1	28	7.84	1	6	4	0.69612
1	1	1	48	23.04	1	6	2	0.541853
1	1	1	61	37.21	1	0	2	0.819489
1	1	1	50	25	1	6	5	0.560005
1	1	1	67	44.89	1	0	6	0.6407
1	1	1	67	44.89	1	6	2	0.812822
1	1	1	50	25	1	9	6	0.709971
1	1	1	19	3.61	0	9	1	0.709971
1	1	0	80	64	0	6	1	0.903429
1	1	0	71	50.41	0	0	1	0.893934
1	1	0	50	25	0	0	2	0.890269
1	1	1	65	42.25	1	0	2	0.989335
1	1	1	64	40.96	1	9	2	2.90309
1	1	1	72	51.84	1	6	2	0.865595
1	1	1	69	47.61	1	0	3	0.845204
1	1	1	47	22.09	1	0	3	0.471389
1	1	1	64	40.96	1	12	5	0.676022
1	1	0	51	26.01	1	0	2	0.627517
1	1	0	28	7.84	1	16	2	0.627517
1	1	1	64	40.96	1	0	2	0.763827
1	1	1	65	42.25	0	0	1	0.731305
1	1	1	49	24.01	1	9	2	0.778647
1	1	1	50	25	0	0	4	0.80561
1	1	1	50	25	0	0	4	0.764991
1	1	0	28	7.84	1	12	7	0.836879
1	1	0	69	47.61	1	0	2	0.97148
1	1	1	62	38.44	1	6	3	0.787105
1	1	1	73	53.29	0	0	1	0.71168
1	1	0	69	47.61	1	9	2	3.63347
1	1	1	24	5.76	0	16	4	0.779925
1	1	1	52	27.04	1	9	4	0.364156
1	1	1	50	25	1	9	3	0.364156
1	1	1	66	43.56	1	0	2	1.00075
1	1	0	50	25	0	12	4	3.47712
0	1	0	61	37.21	1	9	2	0.906696
1	1	1	50	25	1	6	2	0.589772
1	1	1	50	25	1	9	3	0.589772
1	1	1	50	25	0	0	1	0.589772
1	1	1	61	37.21	1	12	4	0.715054
1	1	0	76	57.76	1	6	2	0.849441
1	1	0	65	42.25	1	0	5	0.85125
1	1	1	66	43.56	1	0	2	0.863627
1	1	1	66	43.56	1	6	2	0.773605
1	1	1	52	27.04	1	6	3	0.60987
1	1	1	50	25	1	12	3	0
1	1	1	69	47.61	1	0	2	0
1	1	1	63	39.69	1	12	2	0
1	1	1	61	37.21	1	9	2	0.636467
1	1	1	62	38.44	1	9	4	0.564686
1	1	1	55	30.25	1	6	6	0
0	1	1	74	54.76	0	6	1	1
1	1	1	69	47.61	1	6	3	0.907535
1	1	1	73	53.29	0	0	1	0.74865
1	1	1	80	64	0	0	1	0
1	1	1	69	47.61	1	6	2	0.605689
1	1	1	50	25	1	6	4	0.728261
1	1	0	30	9	1	12	7	0.622466
1	1	1	64	40.96	1	9	2	0.447137
1	1	0	36	12.96	1	6	6	0.634031
1	1	0	51	26.01	1	6	2	0.776467
1	1	1	33	10.89	1	9	7	0.871896
1	1	1	66	43.56	1	0	5	1.01293
1	1	1	51	26.01	1	6	6	0.838684
1	1	0	31	9.61	1	9	6	0.652674
1	1	1	26	6.76	1	15	5	0.765565
1	1	0	43	18.49	1	9	3	0.726448
1	1	1	63	39.69	1	6	2	0.895318
1	1	0	56	31.36	1	12	2	0.50529
1	1	0	39	15.21	1	9	7	2.60206
1	1	0	55	30.25	1	9	2	2.66276
1	1	0	31	9.61	1	9	2	2.30103
1	1	1	63	39.69	1	0	5	0.769265
1	1	0	76	57.76	1	0	2	0.799207
1	1	1	53	28.09	0	6	2	0.474466
1	1	0	31	9.61	1	9	7	3
1	1	1	29	8.41	1	6	4	0.929542
1	1	1	29	8.41	1	9	6	0.841278
1	1	1	50	25	1	0	2	0.817444
1	1	1	50	25	1	12	4	0.817444
1	1	0	50	25	1	9	6	0.561325
1	1	1	43	18.49	1	6	4	0.681438
1	1	1	48	23.04	0	9	2	0
1	1	1	26	6.76	1	12	2	0
1	1	0	50	25	1	0	1	0.920246
1	1	1	50	25	1	15	6	0.863917
1	1	1	58	33.64	1	0	5	0.842095
1	1	0	29	8.41	1	9	6	0.922241
1	1	1	70	49	1	6	2	0.623318
1	1	0	45	20.25	1	6	3	0
1	1	0	50	25	0	15	1	0
0	1	0	47	22.09	1	0	4	0.901078
1	1	0	46	21.16	1	9	3	0
1	1	1	71	50.41	1	6	2	0.933239
1	1	1	18	3.24	0	6	3	0.761514
1	1	1	46	21.16	1	0	5	0.809902
1	1	1	61	37.21	0	6	1	0.638299
1	1	1	50	25	0	0	2	0
1	1	1	85	72.25	0	0	1	0.969373
1	1	1	54	29.16	1	9	2	0.584347
1	1	1	57	32.49	1	6	3	0
1	1	1	64	40.96	1	9	2	0.33052
1	1	1	45	20.25	1	9	7	0.970596
1	1	1	56	31.36	1	9	2	0.887518
1	1	1	65	42.25	1	0	2	0.743639
1	1	1	58	33.64	1	9	2	0.68541
1	1	1	61	37.21	0	6	1	0.864708
1	1	1	61	37.21	1	9	3	0.762648
1	1	1	48	23.04	1	6	3	0.717879
1	1	1	77	59.29	0	0	1	0.572842
1	1	1	47	22.09	1	0	3	0
1	1	1	53	28.09	0	9	1	0.718922
1	1	1	86	73.96	0	0	3	1.14379
1	1	1	49	24.01	1	12	3	0.560851
1	1	1	50	25	1	9	3	0.560851
1	1	1	25	6.25	0	15	4	0.556818
1	1	1	78	60.84	1	6	2	0.905772
1	1	1	74	54.76	1	6	2	0.404873
1	1	1	71	50.41	1	6	5	0.957278
1	1	0	49	24.01	1	0	2	2.47712
0	0	1	76	57.76	0	6	1	0.840509
1	1	1	52	27.04	1	6	3	0.628995
1	1	1	50	25	1	12	2	1.11663
1	1	1	50	25	1	9	4	0.668852
1	1	1	23	5.29	0	16	1	0.668852
1	1	0	39	15.21	1	0	4	0.739334
1	1	1	50	25	0	6	1	0
1	1	1	66	43.56	1	6	2	0.738787
1	1	1	77	59.29	1	9	2	0.938123
1	1	0	50	25	1	9	5	0.550463
1	1	1	54	29.16	1	6	2	0.591152
1	1	0	50	25	1	9	4	0.587886
1	1	1	36	12.96	1	9	4	0.820172
1	1	1	54	29.16	1	9	2	0.208725
1	1	1	25	6.25	1	0	3	0.208725
1	1	1	64	40.96	1	12	2	1.14855
1	1	1	58	33.64	1	6	5	0.535953
1	1	1	69	47.61	1	0	3	0.77361
1	1	1	58	33.64	1	12	3	0.590457
1	1	1	61	37.21	1	9	3	0
1	1	1	54	29.16	1	9	3	0.630884
1	1	1	50	25	0	0	5	0.527626
1	1	0	61	37.21	1	0	5	0.772595
1	1	1	34	11.56	1	9	7	0.729981
1	1	1	72	51.84	1	0	4	1.12766
1	1	1	66	43.56	0	0	1	0.634722
1	1	0	64	40.96	0	9	1	2.62325
1	1	1	70	49	0	6	1	1.30103
1	1	0	62	38.44	1	6	3	0
1	1	1	50	25	1	9	3	0.48914
1	1	1	32	10.24	1	6	7	1.11897
1	1	1	61	37.21	1	9	3	0.947142
1	1	1	50	25	0	0	3	0.947142
1	1	1	50	25	1	12	6	0.704528
1	1	1	63	39.69	1	12	6	0.762653
1	1	1	39	15.21	1	9	6	3.47712
1	1	0	40	16	1	9	5	2.30103
1	1	1	50	25	1	6	4	0.86002
1	1	1	40	16	1	12	5	0.564388
1	1	1	26	6.76	1	12	4	0.850158
1	1	1	45	20.25	1	9	4	0.621057
1	1	1	50	25	1	9	6	0.532012
1	1	1	24	5.76	0	15	4	0.621824
1	1	1	31	9.61	1	9	6	0.780132
1	1	1	52	27.04	1	9	4	0.793815
1	1	1	26	6.76	1	12	8	0.736781
1	1	0	50	25	1	6	4	0.46028
1	1	1	55	30.25	1	9	7	0.620911
1	1	1	30	9	1	15	6	0.845095
1	1	1	31	9.61	1	9	7	0.820072
0	0	1	50	25	0	0	5	1.06513
1	1	1	51	26.01	1	9	2	0.541226
1	1	0	67	44.89	1	0	2	3.30103
1	1	0	24	5.76	0	12	1	0.727449
1	1	0	45	20.25	1	6	3	3.30103
1	1	1	41	16.81	1	9	6	0.655594
1	1	1	40	16	1	9	3	0.629247
1	1	0	35	12.25	1	9	6	3.69897
1	1	0	35	12.25	1	9	7	3.69897
1	1	1	53	28.09	1	9	2	0
1	1	1	53	28.09	1	9	2	0.774692
1	1	0	31	9.61	1	9	4	0.73995
1	1	1	63	39.69	1	0	3	3.39794
1	1	1	45	20.25	1	12	4	0
1	1	1	47	22.09	1	6	4	0.821376
1	1	0	29	8.41	1	9	9	3.54407
1	1	1	46	21.16	1	6	6	0.700337
1	1	1	49	24.01	1	6	4	0.754303
1	1	1	60	36	0	0	1	0.826581
1	1	1	29	8.41	1	9	7	0.996538
1	1	1	65	42.25	1	0	2	2.60206
1	1	1	45	20.25	1	9	7	0.708259
1	1	1	23	5.29	0	9	4	0.832606
1	1	1	64	40.96	1	9	3	0.904384
1	1	1	50	25	1	14	4	0.672619
1	1	1	60	36	1	12	2	0.752333
1	1	0	67	44.89	1	12	5	0.669845
1	1	1	47	22.09	1	9	6	0.710901
1	1	1	50	25	1	9	5	0.778495
1	1	1	20	4	0	12	5	0.755816
1	1	0	34	11.56	1	9	4	0.957458
1	1	1	38	14.44	1	9	6	0.828337
1	1	1	69	47.61	0	6	1	0.582045
1	1	0	50	25	0	0	2	0.752414
1	1	0	29	8.41	1	6	6	0.602836
1	1	0	50	25	1	9	7	3.47712
1	1	0	65	42.25	1	6	3	0.495365
1	1	1	45	20.25	1	6	6	0.546771
1	1	0	20	4	0	9	5	3
1	1	0	49	24.01	1	6	2	0
1	1	0	26	6.76	1	9	3	0
1	1	1	30	9	1	9	6	0.768389
1	1	1	28	7.84	1	9	4	0.953553
1	1	1	31	9.61	1	0	5	0
0	0	1	20	4	0	12	6	1.03082
1	1	1	28	7.84	1	16	8	0
1	1	1	50	25	1	0	3	0.726607
1	1	1	50	25	0	0	5	0.693251
1	1	0	50	25	1	9	2	0.527163
1	1	1	40	16	1	12	6	0.922838
1	1	1	66	43.56	1	0	6	0.867616
1	1	1	50	25	0	0	8	0.6805
1	1	0	50	25	1	15	8	0
1	1	1	53	28.09	1	12	3	0.760956
1	1	1	23	5.29	0	15	1	0.760956
1	1	1	53	28.09	1	9	2	0
1	1	0	50	25	1	6	2	0
1	1	0	29	8.41	0	15	3	0.702501
1	1	1	51	26.01	1	6	2	0.773463
1	1	1	22	4.84	0	9	3	0
1	1	1	31	9.61	1	9	6	0.954222
1	1	1	62	38.44	1	9	2	0.901995
1	1	1	65	42.25	1	6	3	0.867368
1	1	1	62	38.44	1	9	2	0.588167
1	1	1	43	18.49	1	9	4	0.713448
1	1	1	58	33.64	1	12	3	0.617993
1	1	1	34	11.56	1	12	3	0.617993
1	1	1	45	20.25	1	6	4	0.647974
1	1	1	56	31.36	1	9	4	0.789947
1	1	1	44	19.36	1	9	5	0.684713
1	1	1	34	11.56	1	12	5	0.629279
1	1	1	33	10.89	1	9	6	0
1	1	1	47	22.09	1	9	2	0.779079
1	1	1	58	33.64	1	12	3	0.772195
1	1	1	45	20.25	1	6	3	1.16355
1	1	1	62	38.44	1	9	2	0.383095
1	1	1	57	32.49	1	9	4	0.571259
1	1	0	50	25	1	9	3	0
1	1	1	66	43.56	1	12	6	0.898619
1	1	1	28	7.84	1	6	4	0.688007
0	1	1	51	26.01	1	6	3	0.939026
1	1	1	66	43.56	1	0	5	0.708605
1	1	1	50	25	0	0	5	0.845786
1	1	0	69	47.61	1	0	2	0.776295
1	1	0	46	21.16	1	6	3	3.30103
1	1	1	50	25	0	12	3	0
1	1	1	52	27.04	1	6	2	0.613304
1	1	1	55	30.25	0	0	1	0
0	1	0	33	10.89	1	6	3	1.3314
1	1	0	33	10.89	1	6	4	0
1	1	0	50	25	1	0	4	0.661479
1	1	1	45	20.25	1	6	4	0.787902
1	1	1	49	24.01	1	15	2	0.698629
1	1	1	45	20.25	1	6	5	0.433863
1	1	0	58	33.64	1	0	4	0.659131
1	1	1	41	16.81	1	9	4	0.766722
1	1	1	26	6.76	0	9	6	0.755667
1	1	0	50	25	1	6	4	2
1	1	0	42	17.64	1	0	4	0.933191
1	1	0	67	44.89	0	0	2	0.933191
1	1	1	34	11.56	1	6	7	0.585628
1	1	0	52	27.04	1	0	2	0.424955
1	1	1	36	12.96	1	9	6	0
1	1	1	61	37.21	1	9	4	0.555182
1	1	1	34	11.56	1	9	1	0.555182
1	1	1	38	14.44	1	9	1	0.555182
1	1	1	47	22.09	1	6	2	0.448039
1	1	1	50	25	1	6	6	0.788918
1	1	1	62	38.44	1	9	2	0.573258
1	1	1	55	30.25	1	6	6	0.567685
1	1	1	60	36	1	9	3	0.760556
1	1	1	46	21.16	1	6	3	0.600925
1	1	1	23	5.29	0	15	1	0.600925
1	1	0	50	25	1	9	4	2.47712
1	1	1	49	24.01	1	9	3	0.691174
1	1	1	52	27.04	1	0	3	0.928383
1	1	1	50	25	0	0	4	0.721451
1	1	1	50	25	1	6	4	0.625956
0	0	1	48	23.04	1	9	2	0.931776
0	1	1	26	6.76	1	12	3	0.931776
1	1	1	58	33.64	1	0	6	0.947258
1	1	1	58	33.64	1	9	3	0.65453
1	1	0	52	27.04	1	6	4	0.86928
1	1	1	67	44.89	1	9	2	0.730907
1	1	1	62	38.44	1	9	4	0.907392
1	1	0	48	23.04	1	6	5	0
1	1	1	50	25	1	12	6	0.559853
1	1	1	50	25	0	0	2	0.689616
1	1	1	62	38.44	1	9	3	0.74682
0	1	1	66	43.56	1	0	2	1.17017
1	1	0	38	14.44	1	6	4	0.540691
1	1	1	58	33.64	1	0	2	0.612984
1	1	1	54	29.16	1	6	5	1.37784
1	1	0	55	30.25	1	12	2	0.53664
1	1	0	50	25	0	12	1	0.523206
1	1	0	54	29.16	1	12	3	0.801023
1	1	0	27	7.29	1	16	3	0.801023
1	1	0	50	25	1	12	3	0.751341
1	1	1	68	46.24	1	9	6	0.616158
1	1	0	34	11.56	1	12	5	0.540623
1	1	1	62	38.44	1	6	7	0.564675
1	1	0	25	6.25	0	12	4	0.821669
1	1	0	50	25	1	0	3	0.821669
1	1	1	32	10.24	1	9	4	0.842509
1	1	1	36	12.96	1	12	7	0.59526
1	1	1	38	14.44	1	9	4	0.941714
1	1	1	35	12.25	1	9	7	0.600738
1	1	1	43	18.49	1	9	3	0.533403
1	1	0	60	36	1	0	8	0.807389
1	1	0	50	25	1	6	2	0.7345
1	1	1	62	38.44	1	0	8	0.621331
0	1	1	47	22.09	0	9	3	0.916683
1	1	1	58	33.64	1	6	2	0.695297
1	1	0	50	25	1	6	4	0.703975
1	1	1	25	6.25	0	9	5	0.754708
1	1	1	59	34.81	1	6	2	0.552065
0	0	1	42	17.64	1	9	4	0.842493
1	1	1	50	25	1	6	3	0.583134
1	1	1	39	15.21	1	9	5	0.749004
1	1	0	59	34.81	1	12	2	1.10521
1	1	1	50	25	1	9	7	0.90473
1	1	1	24	5.76	0	9	5	0.770255
1	1	1	40	16	1	9	4	0
1	1	1	52	27.04	1	9	2	0.597715
1	1	1	49	24.01	1	9	4	0.538412
1	1	1	45	20.25	1	6	4	0.400156
1	1	0	44	19.36	1	12	5	0.617826
1	1	1	48	23.04	1	0	4	0.690136
1	1	0	26	6.76	1	16	3	3.60206
1	1	0	38	14.44	1	9	4	0
1	1	1	69	47.61	1	12	2	0.750699
1	1	0	50	25	1	9	3	0
1	1	0	24	5.76	0	16	1	0
0	0	0	77	59.29	0	6	1	1.46654
1	1	1	44	19.36	1	6	4	0.771083
1	1	1	56	31.36	1	9	6	0.407592
1	1	0	37	13.69	1	9	4	0
1	1	1	53	28.09	1	6	6	0.645525
1	1	1	50	25	1	9	5	0.684602
1	1	0	66	43.56	1	0	2	0.809419
1	1	0	25	6.25	0	12	3	0.532346
1	1	0	65	42.25	1	6	2	0.816609
1	1	0	43	18.49	1	9	4	0.871786
1	1	0	50	25	0	0	6	0.776032
1	1	0	60	36	1	0	2	0.735442
1	1	0	73	53.29	0	0	2	1.2194
1	1	0	66	43.56	1	0	2	0.752205
1	1	1	51	26.01	1	0	5	1.43368
1	1	1	50	25	1	6	5	1.63424
1	1	1	59	34.81	1	0	2	1.12816
0	1	0	73	53.29	1	9	2	0.854474
1	1	1	56	31.36	1	9	5	0.771117
1	1	1	50	25	0	0	3	0.771117
1	1	1	50	25	1	16	8	0.749576
1	1	0	60	36	1	12	13	3
1	1	1	50	25	1	9	6	0.688189
1	1	1	68	46.24	0	0	2	0.822728
1	1	0	77	59.29	0	6	1	0.682138
1	1	1	51	26.01	1	6	3	0
1	1	0	31	9.61	0	0	2	0.909169
1	1	0	47	22.09	1	0	4	0.651882
1	1	0	52	27.04	1	6	2	0.661645
1	1	0	52	27.04	1	0	3	0
0	0	0	50	25	0	0	2	4.30103
0	0	0	27	7.29	1	9	4	5.25527
1	1	0	27	7.29	1	9	4	0
1	1	0	23	5.29	0	15	5	3
1	1	0	42	17.64	1	0	4	0
1	1	1	61	37.21	1	9	2	0.644095
1	1	1	50	25	0	0	4	0.644095
1	1	1	70	49	1	6	2	0.91569
1	1	1	57	32.49	1	12	8	0.386463
1	1	1	69	47.61	1	0	2	0.719659
1	1	1	69	47.61	1	6	2	0.995589
0	1	0	50	25	1	9	2	1.00987
1	1	1	35	12.25	1	6	6	1.00399
1	1	1	63	39.69	1	0	2	0.68751
1	1	1	69	47.61	1	0	2	1.04418
1	1	1	36	12.96	1	0	9	0.949812
1	1	1	57	32.49	1	12	3	1.25425
1	1	0	50	25	1	9	7	0.849793
1	1	1	46	21.16	1	9	5	0.523
0	0	1	75	56.25	0	9	2	1.05891
1	1	1	24	5.76	0	9	6	0.863571
1	1	1	50	25	1	12	3	0.635683
1	1	0	49	24.01	1	6	6	0.733838
1	1	1	63	39.69	1	6	3	0.613725
1	1	1	49	24.01	1	9	2	0
1	1	1	28	7.84	1	12	7	0.382005
1	1	1	50	25	1	15	5	0.556767
1	1	1	67	44.89	0	6	1	0.740178
1	1	1	52	27.04	1	0	3	0.541699
1	1	1	50	25	0	9	4	0.65991
1	1	1	51	26.01	1	9	4	0.818746
1	1	0	50	25	1	12	3	0
1	1	1	37	13.69	1	9	6	0.745285
1	1	0	50	25	0	0	1	0
1	1	1	50	25	0	0	6	0.654478
1	1	1	50	25	1	6	3	0.660201
1	1	1	29	8.41	1	9	3	0.660201
1	1	1	45	20.25	1	6	4	0.589176
1	1	1	31	9.61	1	9	6	0.488006
1	1	0	48	23.04	1	9	4	0
1	1	0	48	23.04	1	9	2	0
1	1	1	64	40.96	1	9	5	0.850603
1	1	1	62	38.44	0	9	4	0.681488
1	1	0	26	6.76	1	9	6	0
1	1	1	54	29.16	1	9	4	0.648371
1	1	1	50	25	0	0	2	0.648371
1	1	0	34	11.56	1	9	3	0.804548
1	1	0	50	25	0	0	3	0.804548
1	1	0	50	25	0	0	6	0.502058
1	1	1	34	11.56	1	15	9	0.517961
1	1	1	50	25	0	0	1	0.517961
1	1	1	50	25	0	0	1	0.549868
1	1	1	32	10.24	1	9	5	0.708172
1	1	1	56	31.36	1	9	4	1
1	1	1	43	18.49	1	9	5	0.532623
0	0	1	58	33.64	1	6	2	0.893248
1	1	1	46	21.16	1	6	3	0.562072
1	1	1	54	29.16	1	9	9	0.82705
1	1	1	63	39.69	1	0	5	0.807628
1	1	0	40	16	1	6	5	0
1	1	0	62	38.44	1	9	6	0.584999
1	1	1	37	13.69	1	6	4	0.649361
1	1	1	63	39.69	1	0	5	0.784662
1	1	1	62	38.44	1	6	2	0.921582
1	1	1	72	51.84	1	6	2	0.794584
1	1	1	24	5.76	0	12	3	0.728803
1	1	1	62	38.44	1	6	6	0.699225
1	1	1	66	43.56	1	9	3	0.714772
1	1	1	51	26.01	1	9	3	0.555046
1	1	1	35	12.25	1	9	6	0.639874
1	1	0	69	47.61	1	9	2	0.600551
1	1	1	50	25	0	0	5	0.917802
0	0	1	50	25	0	0	2	1.52928
1	1	1	62	38.44	1	0	6	0.92822
1	1	1	64	40.96	1	0	2	0.815653
1	1	1	56	31.36	1	6	2	0.660021
1	1	1	50	25	1	0	6	0.689432
1	1	1	50	25	1	6	4	0.811956
1	1	1	26	6.76	1	9	4	4
1	1	1	59	34.81	1	9	6	0.556274
1	1	1	43	18.49	1	0	4	0
1	1	1	62	38.44	1	0	5	0.786388
1	1	1	50	25	1	0	5	0.988639
1	1	1	50	25	1	6	2	0.988639
1	1	1	50	25	1	0	6	0.612729
1	1	0	36	12.96	1	9	3	3.32193
1	1	1	49	24.01	1	6	4	0.591121
1	1	1	67	44.89	1	9	2	0.535619
1	1	1	66	43.56	1	0	2	0.981237
0	0	1	50	25	0	0	2	1.17588
1	1	1	56	31.36	1	9	2	0
1	1	1	29	8.41	1	9	3	0
1	1	1	67	44.89	1	6	2	0.927948
0	0	1	62	38.44	1	9	2	1.04487
1	1	1	64	40.96	1	0	3	0.684646
1	1	1	50	25	1	6	9	0.623796
1	1	0	26	6.76	1	6	5	0.609738
1	1	0	51	26.01	1	9	2	0.699435
1	1	0	50	25	0	0	5	3.30103
1	1	1	50	25	0	6	2	1.20449
1	1	0	35	12.25	1	9	5	0.705161
1	1	1	55	30.25	1	0	2	0.920439
1	1	1	35	12.25	1	9	3	0.920439
1	1	0	52	27.04	1	6	3	0.773304
1	1	1	66	43.56	0	6	1	0.750423
1	1	1	74	54.76	1	0	5	0.515631
1	1	0	45	20.25	1	9	2	0.525324
1	1	0	72	51.84	0	6	2	1.2194
1	1	0	77	59.29	0	0	1	0
1	1	0	55	30.25	1	9	6	0.793727
1	1	0	54	29.16	1	12	8	0.877905
1	1	0	34	11.56	1	15	13	0.93001
1	1	0	64	40.96	1	9	2	0.844473
1	1	0	68	46.24	1	6	2	1.15072
1	1	0	78	60.84	0	0	1	0.937916
1	1	0	34	11.56	1	12	6	0.9043
1	1	0	50	25	0	0	2	0.718375
1	1	0	52	27.04	1	0	6	0
1	1	1	29	8.41	1	9	3	0.820072
1	1	0	74	54.76	1	9	2	0
1	1	0	74	54.76	1	0	2	0.989976
1	1	0	63	39.69	1	0	2	0
1	1	1	57	32.49	0	0	1	0.968689
1	1	0	50	25	1	0	2	0
1	1	1	64	40.96	1	0	2	1.27415
1	1	1	43	18.49	1	9	5	0.86575
1	1	1	51	26.01	1	12	4	0.79728
1	1	0	68	46.24	1	9	5	0.822423
1	1	1	36	12.96	1	9	3	0.556051
1	1	1	53	28.09	1	9	4	0.827986
1	1	1	52	27.04	1	9	7	0
1	1	1	52	27.04	1	12	4	0
1	1	1	29	8.41	1	9	5	0
1	1	1	50	25	1	9	5	0
1	1	0	62	38.44	0	9	2	0
1	1	0	74	54.76	0	6	5	0
1	1	1	48	23.04	1	9	3	0.666297
1	1	1	50	25	0	0	2	0.666297
1	1	1	34	11.56	1	9	6	0.77235
1	1	1	31	9.61	1	6	6	0.649534
1	1	0	50	25	0	16	6	0
1	1	1	50	25	0	9	2	0.793256
1	1	1	29	8.41	1	12	5	0.647338
1	1	1	47	22.09	1	6	2	0.683389
1	1	0	29	8.41	1	12	6	0
1	1	0	50	25	0	0	5	0
1	1	1	85	72.25	0	6	2	0.825707
1	1	0	52	27.04	1	6	5	0
1	1	1	31	9.61	1	9	4	0
1	1	1	55	30.25	1	9	2	0.678109
1	1	0	23	5.29	0	9	1	0.610633
1	1	0	73	53.29	0	6	1	0.783663
0	0	0	51	26.01	0	9	4	0.997794
1	1	0	50	25	1	9	2	0
1	1	0	50	25	1	9	3	0
1	1	1	52	27.04	1	15	6	0.514287
1	1	0	59	34.81	1	6	5	0.619982
1	1	1	38	14.44	1	12	5	0.883767
1	1	1	50	25	1	6	4	0.745904
1	1	0	68	46.24	1	0	4	0.687801
1	1	0	74	54.76	1	6	2	0.801955
1	1	1	69	47.61	1	6	2	0.810511
1	1	0	62	38.44	1	9	4	0.821195
1	1	1	45	20.25	1	6	4	0.665069
1	1	1	33	10.89	1	12	8	0.687132
1	1	0	84	70.56	0	9	3	0.779933
1	1	0	45	20.25	1	6	3	0.924743
1	1	0	48	23.04	1	9	3	2.47712
1	1	1	51	26.01	1	9	4	0
1	1	1	63	39.69	1	0	6	0.782148
1	1	1	50	25	1	0	4	0.782148
1	1	1	50	25	1	12	7	0.60168
1	1	1	50	25	1	0	6	1.12055
1	1	1	63	39.69	1	9	2	0.539227
1	1	1	50	25	0	0	4	1.21174
1	1	1	65	42.25	1	0	2	0.648538
1	1	1	53	28.09	1	6	3	0.662268
0	1	0	75	56.25	1	6	2	0.930498
1	1	1	43	18.49	1	9	4	3.47712
1	1	1	50	25	1	9	6	0.576959
1	1	1	50	25	1	9	6	0.566861
1	1	1	23	5.29	1	15	2	0.566861
1	1	1	44	19.36	1	9	3	0.648508
1	1	1	44	19.36	1	12	4	0.853667
1	1	1	61	37.21	1	12	2	0.530698
1	1	1	49	24.01	1	9	5	0.589443
1	1	1	50	25	1	9	7	0.832983
1	1	0	26	6.76	1	12	5	1
1	1	1	27	7.29	0	9	4	0.605306
1	1	1	50	25	1	9	5	0.678067
1	1	1	55	30.25	1	6	5	0.734749
1	1	1	50	25	0	0	4	0.68422
1	1	1	59	34.81	1	6	2	0
1	1	0	33	10.89	1	16	3	0
1	1	0	50	25	0	0	4	0
1	1	1	50	25	0	0	3	0.615326
1	1	1	27	7.29	1	0	6	0
1	1	0	33	10.89	1	16	6	0.707397
1	1	1	50	25	1	15	2	0.754887
1	1	1	55	30.25	1	9	5	2.60206
1	1	1	34	11.56	1	9	4	0.874486
1	1	0	29	8.41	1	6	6	0.460206
1	1	1	52	27.04	1	12	5	0.500355
1	1	1	48	23.04	1	0	6	0.503191
1	1	0	50	25	1	0	3	0
0	0	1	28	7.84	1	0	2	1.09078
1	1	1	36	12.96	1	15	4	0.63291
1	1	1	50	25	0	0	3	2.47712
1	1	1	28	7.84	1	12	7	0.513995
1	1	0	34	11.56	1	9	10	0.867836
1	1	1	32	10.24	1	9	5	0.350523
1	1	1	32	10.24	1	9	8	0.864032
1	1	0	30	9	1	12	2	0.5
1	1	1	29	8.41	1	0	5	0.651297
1	1	1	50	25	0	0	3	0.867515
1	1	1	31	9.61	1	0	3	0.867515
1	1	1	50	25	1	9	5	0.673734
1	1	0	28	7.84	1	6	4	0.835334
1	1	1	50	25	1	15	3	0.765108
1	1	1	28	7.84	1	9	4	0.818589
1	1	1	50	25	0	0	3	0
1	1	1	40	16	1	0	7	0.758742
1	1	1	32	10.24	1	15	8	0.769933
1	1	1	50	25	1	9	4	0.64629
1	1	0	24	5.76	1	0	4	0.702501
1	1	1	50	25	0	9	8	0.809687
1	1	0	36	12.96	1	9	6	0.624441
1	1	1	63	39.69	1	0	5	0.687129
1	1	1	32	10.24	1	0	3	0
1	1	1	29	8.41	1	15	7	0.776242
1	1	1	50	25	1	12	4	0.52878
1	1	1	32	10.24	1	15	5	0.585656
1	1	1	50	25	0	0	3	0.84324
1	1	0	17	2.89	0	12	5	0.705766
1	1	1	50	25	1	0	4	0
1	1	1	43	18.49	1	9	4	0.636132
1	1	0	50	25	1	0	3	0.638438
1	1	1	29	8.41	1	9	8	1.02392
1	1	0	50	25	0	0	3	0.627858
1	1	1	50	25	1	9	4	3.47712
1	1	1	50	25	1	9	6	3.69897
1	1	1	41	16.81	1	12	4	0.314061
1	1	0	50	25	0	0	3	0.782975
0	0	1	43	18.49	0	0	3	0.946762
1	1	1	29	8.41	1	15	4	0.665723
1	1	1	25	6.25	1	0	7	0.69326
1	1	1	50	25	0	0	3	0.845105
1	1	1	23	5.29	1	0	4	0.562337
1	1	1	29	8.41	1	0	8	0.877171
1	1	1	47	22.09	0	0	2	0.742353
1	1	0	29	8.41	1	9	4	0.695424
1	1	1	66	43.56	1	0	4	0.7754
1	1	0	50	25	0	0	8	0.51321
1	1	1	50	25	1	9	4	0.758585
1	1	0	27	7.29	1	0	4	3.17609
1	1	0	55	30.25	1	6	5	0
1	1	0	33	10.89	1	9	3	0.602836
1	1	0	50	25	1	15	3	0.648428
1	1	0	50	25	1	15	4	0.538264
0	0	1	50	25	0	0	2	1.18048
1	1	1	50	25	1	6	3	0.563426
1	1	1	46	21.16	1	15	5	0.562282
1	1	1	50	25	1	9	2	0.705601
1	1	1	50	25	0	0	3	0.821337
0	0	1	46	21.16	1	9	4	1.08649
1	1	1	50	25	1	9	7	0.593793
1	1	0	50	25	1	9	6	0.745421
1	1	1	49	24.01	1	9	4	0.811785
1	1	1	82	67.24	0	0	3	0.811407
1	1	1	67	44.89	1	0	2	0.972703
1	1	0	50	25	1	6	6	0.636134
1	1	1	50	25	1	9	6	0.884989
1	1	1	34	11.56	1	9	6	0.885747
0	0	1	24	5.76	1	6	6	0.980846
1	1	1	41	16.81	1	12	4	0.953312
1	1	1	62	38.44	1	9	5	0.780314
1	1	1	50	25	0	0	4	0.64355
1	1	1	50	25	0	0	4	0.858503
1	1	1	31	9.61	1	0	6	0.730665
1	1	1	58	33.64	1	6	2	0.830263
1	1	1	51	26.01	1	6	2	0.724746
1	1	1	31	9.61	1	9	6	1.22307
1	1	1	66	43.56	1	0	2	0.70557
1	1	1	50	25	1	9	5	0.572029
0	1	1	52	27.04	1	6	6	0.970545
1	1	1	34	11.56	1	6	5	0.999351
1	1	0	50	25	1	0	2	0.902106
1	1	1	50	25	1	6	2	0.960693
1	1	1	66	43.56	1	6	5	0.747719
1	1	1	17	2.89	0	9	3	0.857862
1	1	1	63	39.69	1	0	2	0.895404
1	1	1	67	44.89	1	12	2	0.913715
1	1	1	65	42.25	1	0	6	0.732259
1	1	1	56	31.36	1	6	5	0.786608
1	1	1	50	25	1	0	4	0.902294
1	1	1	49	24.01	1	6	3	0.650477
1	1	1	45	20.25	1	0	6	0.953028
0	1	1	71	50.41	1	6	2	1.25713
1	1	1	74	54.76	1	6	4	1.10688
1	1	1	50	25	1	0	2	0.813682
1	1	1	58	33.64	1	0	2	0.695978
1	1	1	69	47.61	1	6	2	0.625042
1	1	1	47	22.09	0	6	4	0.796839
1	1	1	50	25	1	0	2	0.678885
1	1	1	70	49	0	0	1	0.590425
1	1	1	78	60.84	0	6	1	0.74541
1	1	1	50	25	1	6	2	0.777242
1	1	1	41	16.81	0	12	3	0.453959
1	1	1	66	43.56	1	0	2	0.720963
1	1	1	38	14.44	1	9	3	0.720963
1	1	1	70	49	1	9	2	0.713704
1	1	1	79	62.41	1	6	2	0.690585
1	1	1	61	37.21	1	6	2	0.750518
0	1	1	68	46.24	1	6	2	1.01219
1	1	1	44	19.36	1	9	5	0.592355
1	1	1	46	21.16	0	9	2	0.618384
1	1	0	52	27.04	1	0	2	0.631748
1	1	1	66	43.56	1	6	2	0.501404
0	0	1	53	28.09	1	6	3	0.942851
1	1	1	67	44.89	1	6	2	0.489122
1	1	1	58	33.64	1	0	2	0.846664
1	1	1	75	56.25	1	9	2	0.785698
1	1	1	54	29.16	1	6	3	0.545198
1	1	1	61	37.21	1	0	3	0.573784
1	1	0	60	36	1	0	2	0.820283
1	1	1	48	23.04	1	9	2	0
1	1	0	68	46.24	1	0	2	0
1	1	0	50	25	1	9	2	0.735442
1	1	0	50	25	1	0	3	2.47712
1	1	1	50	25	1	6	2	0.660196
1	1	0	36	12.96	1	9	6	2
1	1	0	50	25	1	6	4	0.658782
1	1	1	30	9	0	9	3	0.744404
1	1	0	65	42.25	1	0	2	0.599261
1	1	0	60	36	1	9	2	0
1	1	1	50	25	1	9	5	0.430531
1	1	0	50	25	1	12	3	0
1	1	0	69	47.61	1	0	2	0
1	1	1	50	25	1	0	5	0.553591
1	1	0	62	38.44	1	6	2	0.49502
1	1	0	47	22.09	1	9	3	0.633929
0	1	0	50	25	0	0	1	1.26492
1	1	1	58	33.64	1	0	2	0.803774
1	1	0	50	25	1	6	2	0.457169
0	0	0	50	25	1	9	4	0.987399
1	1	0	32	10.24	1	15	6	0.63575
1	1	0	50	25	1	0	2	0.85619
0	1	0	67	44.89	0	0	1	0.977869
1	1	0	50	25	1	6	2	0.667832
1	1	1	59	34.81	1	9	2	0.428586
1	1	1	48	23.04	1	9	3	0.553628
1	1	0	67	44.89	1	0	5	0
1	1	0	50	25	1	0	2	0.716951
1	1	1	48	23.04	0	9	2	0.788302
1	1	0	75	56.25	0	0	3	0
1	1	1	50	25	1	12	2	0.587732
1	1	1	64	40.96	1	12	2	0.648935
1	1	1	50	25	1	6	3	0.581242
1	1	1	62	38.44	1	0	2	0.860443
1	1	0	50	25	1	9	2	0.747286
1	1	1	43	18.49	1	9	3	0.552397
1	1	1	69	47.61	0	6	1	0.852444
1	1	1	32	10.24	1	9	5	0
1	1	1	46	21.16	1	6	3	0
1	1	0	50	25	0	0	1	0
1	1	0	64	40.96	1	12	2	0
1	1	0	78	60.84	1	9	2	0.61741
1	1	1	54	29.16	1	0	2	0.576428
1	1	1	70	49	0	0	1	0
1	1	1	66	43.56	1	0	2	0.873716
1	1	1	24	5.76	0	9	3	0.828166
1	1	1	50	25	0	0	3	0
1	1	1	35	12.25	1	16	6	0.609061
0	0	0	50	25	1	0	5	1.25
1	1	0	65	42.25	1	0	2	0.804548
1	1	1	55	30.25	1	0	9	0.427612
1	1	0	56	31.36	1	9	2	0.68308
1	1	0	50	25	1	0	4	0.68308
1	1	0	50	25	0	6	4	0.775371
1	1	1	50	25	0	6	1	0.763328
1	1	0	81	65.61	0	6	1	0.822348
1	1	1	50	25	1	6	5	0.832674
1	1	0	54	29.16	1	6	3	0.515113
1	1	0	73	53.29	1	6	2	0.75
1	1	0	55	30.25	1	9	5	0.589484
1	1	1	45	20.25	1	6	4	0.866167
1	1	1	50	25	1	0	3	0.866167
1	1	0	54	29.16	1	0	3	0.579167
1	1	1	64	40.96	1	6	4	0.617222
1	1	1	61	37.21	1	9	3	0.624143
1	1	0	32	10.24	1	9	3	0.566602
0	0	1	27	7.29	0	12	3	1.0419
0	0	1	27	7.29	0	12	1	1.0419
1	1	0	51	26.01	1	6	3	0.686012
1	1	0	35	12.25	1	12	4	0.846016
1	1	0	35	12.25	1	12	4	0.846016
1	1	0	64	40.96	1	9	2	0.733514
1	1	1	59	34.81	1	6	5	0.531903
1	1	0	20	4	0	6	5	0.90271
0	0	1	70	49	1	0	2	0.900766
1	1	1	51	26.01	1	0	3	0.732382
1	1	1	53	28.09	1	0	4	0.417635
1	1	0	61	37.21	1	6	4	0.667286
1	1	0	50	25	1	0	5	0.793301
1	1	0	49	24.01	1	6	3	0.880269
1	1	1	30	9	1	15	2	0.576417
1	1	0	78	60.84	1	6	2	0.672584
1	1	1	51	26.01	1	6	3	0.51902
1	1	1	50	25	0	15	1	0.51902
1	1	0	46	21.16	0	6	4	0.632695
1	1	0	56	31.36	1	6	3	0.570318
1	1	0	50	25	0	0	4	1.03025
1	1	0	49	24.01	1	6	5	0.559777
1	1	0	49	24.01	1	9	3	0.558385
1	1	1	70	49	1	6	5	0.900378
1	1	1	50	25	1	0	6	0.568906
1	1	0	68	46.24	1	6	2	0.738296
1	1	0	68	46.24	1	0	2	0.751224
0	0	0	47	22.09	0	6	2	1.01305
1	1	1	22	4.84	0	12	5	0.804719
1	1	0	20	4	0	9	6	0
1	1	0	54	29.16	1	6	3	0.804038
1	1	1	77	59.29	0	6	1	0.873716
1	1	0	72	51.84	1	6	2	0.893995
0	1	0	61	37.21	0	0	1	3.69897
1	1	1	57	32.49	1	9	4	0.520855
1	1	1	27	7.29	1	0	5	0.736175
1	1	0	71	50.41	1	0	2	1.21072
1	1	1	64	40.96	0	6	1	0.747061
1	1	1	62	38.44	1	9	2	0.805694
1	1	1	55	30.25	1	9	2	0.614915
1	1	1	22	4.84	0	15	5	0.406723
1	1	1	50	25	1	6	5	0.519947
1	1	1	50	25	1	6	3	0.482971
1	1	0	76	57.76	1	9	2	1.11426
1	1	1	63	39.69	1	6	2	0.527732
1	1	0	32	10.24	1	15	7	0.795048
1	1	1	54	29.16	1	0	5	0.575633
1	1	1	42	17.64	1	9	3	0.518114
1	1	1	70	49	1	12	2	0.540574
1	1	0	50	25	1	9	3	0.489688
1	1	0	53	28.09	1	6	2	0
1	1	1	47	22.09	1	9	3	0.701902
1	1	1	63	39.69	1	6	2	0.804476
1	1	0	65	42.25	1	6	2	0
1	1	0	47	22.09	1	6	5	0.449683
1	1	1	39	15.21	1	9	6	0.654888
0	1	1	37	13.69	1	6	4	1.59508
1	1	0	63	39.69	0	6	1	0.742318
1	1	1	61	37.21	1	9	4	0.763429
1	1	1	50	25	1	6	3	0.954898
0	0	1	50	25	0	0	1	0.954898
1	1	1	48	23.04	1	6	2	0.659093
1	1	1	25	6.25	0	15	6	0
1	1	1	50	25	1	9	2	0.773773
1	1	1	58	33.64	1	6	6	0.564246
1	1	0	55	30.25	1	6	2	0.638438
1	1	1	67	44.89	1	0	3	0.931944
1	1	1	30	9	1	9	4	0.673424
1	1	1	53	28.09	1	6	4	0.597059
1	1	1	21	4.41	0	9	1	0.597059
1	1	0	50	25	0	12	3	0.855803
1	1	0	56	31.36	1	6	2	0.503064
1	1	1	48	23.04	0	0	3	0.592195
1	1	1	65	42.25	1	6	6	0.797982
1	1	1	42	17.64	1	6	2	0
1	1	1	68	46.24	1	6	2	0
1	1	1	55	30.25	1	9	1	0.40689
1	1	1	65	42.25	1	0	2	0.828352
1	1	1	47	22.09	1	9	3	0.60501
1	1	1	36	12.96	1	9	6	0
1	1	1	50	25	1	9	5	0.835085
1	1	1	65	42.25	1	0	4	0
1	1	1	62	38.44	1	0	3	1.11154
1	1	1	50	25	1	9	7	0.856627
1	1	1	24	5.76	0	15	3	0
1	1	1	46	21.16	1	6	4	0.472452
1	1	1	52	27.04	1	9	6	0.812012
1	1	1	67	44.89	1	6	6	0.806033
1	1	1	63	39.69	0	12	1	0.911455
1	1	0	50	25	0	0	2	0.739578
1	1	1	55	30.25	0	9	1	0
1	1	1	31	9.61	1	9	5	0.791872
1	1	1	34	11.56	1	9	3	0.791872
1	1	1	42	17.64	0	9	1	0.608456
1	1	0	35	12.25	1	9	2	0.638438
1	1	1	62	38.44	1	0	2	0.793299
1	1	1	50	25	1	9	5	0.578253
1	1	1	61	37.21	1	6	2	0
1	1	1	30	9	1	15	5	0
0	0	1	64	40.96	1	6	2	1.1583
1	1	1	50	25	1	0	2	0.57649
0	0	1	81	65.61	0	6	1	1.19027
1	1	0	83	68.89	1	6	2	0.618028
1	1	0	28	7.84	1	9	5	0
1	1	0	63	39.69	1	6	2	3.5682
1	1	0	37	13.69	1	9	4	0
1	1	0	65	42.25	0	0	1	1.33461
1	1	0	45	20.25	1	9	2	0.574375
1	1	0	63	39.69	1	12	2	0.647194
1	1	0	50	25	1	6	5	1.04889
1	1	0	52	27.04	1	6	4	0.737303
1	1	1	42	17.64	1	6	5	0.662158
1	1	0	47	22.09	1	6	2	0.940024
1	1	0	74	54.76	1	0	2	1.12354
0	0	1	72	51.84	1	15	2	0.979361
1	1	1	64	40.96	1	9	6	1.03018
1	1	0	50	25	1	6	3	1.05884
1	1	0	72	51.84	1	6	3	0.640856
1	1	0	72	51.84	1	0	5	0.886784
1	1	0	80	64	1	6	2	0.549842
1	1	0	50	25	0	0	2	1.01727
1	1	0	59	34.81	1	9	3	0.701855
1	1	0	49	24.01	1	6	2	0.548094
1	1	1	70	49	1	6	5	0
1	1	0	49	24.01	1	6	2	0
1	1	0	74	54.76	0	6	1	0
1	1	0	50	25	1	15	3	0.553284
1	1	1	37	13.69	1	12	5	0.805737
1	1	1	25	6.25	0	12	2	0.705562
1	1	1	49	24.01	1	9	4	0.564619
0	1	1	36	12.96	1	9	4	0.956143
1	1	1	69	47.61	0	6	2	0.569589
1	1	1	28	7.84	0	16	3	0.777831
1	1	1	51	26.01	1	9	3	0.648317
1	1	1	46	21.16	1	6	4	0.851865
1	1	1	67	44.89	1	0	5	0.688701
1	1	1	40	16	1	9	4	0.77466
1	1	1	67	44.89	1	9	3	0.76447
1	1	1	52	27.04	0	9	2	0.548057
1	1	1	55	30.25	1	15	3	0.61366
1	1	1	49	24.01	1	9	2	0.491325
0	1	1	25	6.25	1	12	3	0.846432
1	1	1	50	25	1	9	4	0.665108
1	1	1	50	25	0	0	5	0.643316
1	1	1	50	25	0	0	3	0.627517
1	1	1	46	21.16	1	9	4	0.579592
1	1	1	52	27.04	1	9	2	0
1	1	1	54	29.16	1	9	2	0.634689
1	1	1	50	25	1	6	3	0.786211
1	1	1	50	25	0	16	4	0.797644
1	1	1	77	59.29	0	0	6	0.974932
1	1	1	46	21.16	1	6	5	0.649519
0	0	1	58	33.64	0	9	2	1.10832
1	1	1	70	49	1	9	4	0.801187
1	1	0	43	18.49	1	9	4	2.30103
0	0	1	54	29.16	1	6	4	1.17474
1	1	1	54	29.16	1	6	3	0.629705
1	1	1	50	25	1	6	2	0.882888
1	1	1	28	7.84	1	16	1	0.882888
1	1	1	50	25	0	16	1	0.882888
1	1	1	50	25	1	12	5	4.14613
1	1	1	55	30.25	1	9	3	0.651944
1	1	1	56	31.36	1	9	3	0.761546
1	1	1	57	32.49	1	9	5	0
1	1	1	32	10.24	1	9	2	0
1	1	1	50	25	0	6	2	0.674014
0	0	1	64	40.96	0	0	1	0.896415
0	0	1	61	37.21	1	12	2	0.920852
1	1	1	63	39.69	0	12	6	0.876522
1	1	1	53	28.09	1	6	2	0.684898
1	1	1	50	25	1	9	4	0.700205
1	1	1	63	39.69	1	0	2	0
1	1	1	63	39.69	1	0	6	0.84371
1	1	1	67	44.89	1	0	2	0.771576
1	1	1	50	25	1	9	5	0.759871
1	1	1	61	37.21	1	9	4	0
1	1	0	74	54.76	1	9	2	0.885583
1	1	1	29	8.41	1	9	5	0.687317
1	1	1	62	38.44	1	12	3	0.803645
1	1	1	33	10.89	0	6	4	0.748126
1	1	1	45	20.25	1	9	5	0.750142
1	1	1	71	50.41	1	0	2	0.739972
1	1	1	40	16	1	9	4	0.722871
1	1	1	62	38.44	0	6	2	0.703815
1	1	1	34	11.56	1	9	3	0.703815
1	1	1	56	31.36	0	0	2	0.700467
1	1	1	66	43.56	1	6	2	0.638064
1	1	1	15	2.25	0	9	3	0.529179
1	1	1	55	30.25	0	0	2	0.816258
1	1	0	38	14.44	1	9	3	0
1	1	1	77	59.29	0	9	1	0.494222
0	1	1	55	30.25	0	6	3	0.794067
1	1	0	56	31.36	1	0	3	0.883464
1	1	1	50	25	0	0	5	0.504093
1	1	1	59	34.81	1	0	3	0.715956
1	1	0	30	9	1	6	3	0.697507
1	1	1	41	16.81	1	9	2	0.655546
1	1	1	46	21.16	1	9	2	0.557599
1	1	1	56	31.36	1	6	2	0.614079
1	1	1	45	20.25	1	6	3	0
1	1	1	50	25	0	0	2	0.83814
1	1	0	33	10.89	1	6	6	0.223358
1	1	1	24	5.76	1	9	6	0.606387
1	1	1	48	23.04	1	9	4	0.618631
0	1	1	50	25	1	9	2	0.896079
1	1	1	61	37.21	1	0	2	0.545133
1	1	0	22	4.84	0	15	3	0
1	1	0	49	24.01	1	6	2	0.660201
1	1	1	50	25	1	0	2	0.933236
1	1	0	44	19.36	1	6	4	0.752658
1	1	1	28	7.84	1	6	5	0
1	1	1	61	37.21	1	0	5	0.986904
1	1	1	50	25	0	6	2	0.73676
1	1	1	52	27.04	1	0	2	0.522386
1	1	1	38	14.44	1	9	5	0
1	1	1	64	40.96	1	0	2	0.603444
1	1	1	49	24.01	1	9	5	0.616862
1	1	1	44	19.36	1	9	5	0.685869
1	1	1	63	39.69	1	0	5	0.617623
1	1	1	60	36	1	9	2	0.825689
1	1	1	66	43.56	1	0	2	0.877629
1	1	1	50	25	0	0	2	0.671187
0	1	0	65	42.25	1	0	2	1.06587
1	1	1	35	12.25	1	9	5	0.810689
1	1	1	82	67.24	1	6	2	0.820762
1	1	1	43	18.49	0	6	4	0.657422
1	1	1	52	27.04	1	0	3	0.549678
1	1	1	49	24.01	1	6	3	0.521528
1	1	1	54	29.16	1	6	2	0.642749
1	1	0	58	33.64	1	9	2	3.68663
1	1	0	45	20.25	1	6	3	0.683061
1	1	1	50	25	1	6	3	0.790459
1	1	1	63	39.69	1	9	2	0.538671
1	1	1	64	40.96	1	0	1	0.538671
1	1	1	28	7.84	0	15	3	0.523797
1	1	1	47	22.09	0	9	3	0.548779
1	1	1	26	6.76	1	15	2	0.548779
1	1	1	25	6.25	0	16	4	0
1	1	1	64	40.96	1	9	2	0.759494
1	1	1	50	25	0	0	3	0.62656
1	1	1	49	24.01	1	9	2	1.01536
1	1	1	26	6.76	1	9	6	0.89577
1	1	1	41	16.81	1	9	3	0.676827
1	1	1	50	25	1	0	2	0.759358
0	1	1	60	36	1	6	2	0.901036
1	1	1	48	23.04	1	9	4	0.667575
1	1	1	47	22.09	1	9	3	0.970116
1	1	0	65	42.25	1	0	5	0.737374
1	1	0	54	29.16	1	6	2	0.627517
1	1	0	50	25	1	12	3	0
1	1	1	64	40.96	1	0	2	0.836143
1	1	1	43	18.49	0	9	2	0
1	1	1	45	20.25	1	9	4	0.629898
0	1	0	31	9.61	1	0	6	1.05641
1	1	1	47	22.09	0	0	1	0
1	1	1	50	25	1	9	4	0.812713
1	1	1	38	14.44	1	9	3	0.593793
1	1	1	43	18.49	1	9	2	0.650247
1	1	0	37	13.69	1	9	5	0.890864
1	1	0	40	16	1	9	4	0.805597
1	1	1	21	4.41	0	15	3	0.418699
1	1	1	22	4.84	0	12	3	0.609061
1	1	1	50	25	1	9	3	0.677486
1	1	1	50	25	1	9	2	0.677486
0	0	1	32	10.24	0	9	4	0.997446
1	1	1	46	21.16	0	12	3	0.860664
1	1	1	62	38.44	0	0	1	0.886639
1	1	1	63	39.69	1	6	2	0.870753
1	1	1	58	33.64	1	12	3	0.67876
1	1	1	31	9.61	1	9	5	0.849737
1	1	1	45	20.25	1	9	4	0.601859
1	1	1	35	12.25	1	9	5	0.608654
1	1	1	50	25	0	16	3	0.5551
1	1	1	39	15.21	1	9	7	0.673014
0	1	1	67	44.89	1	0	2	0.97246
1	1	0	42	17.64	1	6	3	0.652657
1	1	1	21	4.41	1	12	4	0.658691
1	1	1	50	25	1	9	2	0.852859
1	1	1	31	9.61	1	9	5	0.790459
1	1	1	65	42.25	1	6	3	0.699375
1	1	1	50	25	1	6	2	0.655877
1	1	1	18	3.24	0	9	3	0.623323
1	1	1	50	25	0	0	5	0.78866
1	1	1	58	33.64	1	9	3	0.775894
1	1	1	78	60.84	1	6	2	0.751241
1	1	0	29	8.41	1	0	3	0.553284
1	1	0	74	54.76	1	6	2	3.39794
1	1	0	22	4.84	0	12	4	0
0	0	0	52	27.04	1	9	3	1.04477
1	1	1	36	12.96	0	9	4	0.669256
1	1	0	50	25	0	0	2	0
1	1	0	53	28.09	1	9	6	0.571069
1	1	0	50	25	1	9	4	0
0	0	1	49	24.01	1	0	2	1.0013
1	1	1	63	39.69	1	0	3	0.89679
1	1	1	37	13.69	1	9	6	0.724555
1	1	1	76	57.76	0	9	1	0.848241
1	1	0	51	26.01	1	6	3	0
1	1	1	58	33.64	1	6	3	0.746115
1	1	0	59	34.81	1	9	2	0.759754
1	1	1	48	23.04	1	6	3	0.586174
1	1	1	38	14.44	1	9	4	0
1	1	1	65	42.25	1	6	2	0.609505
1	1	1	50	25	0	0	3	0
1	1	1	19	3.61	0	9	3	0.587055
1	1	1	53	28.09	1	0	2	0
1	1	1	53	28.09	1	6	2	0.527767
1	1	1	50	25	0	9	1	0.527767
1	1	0	54	29.16	1	9	4	0.701139
1	1	1	39	15.21	1	9	3	0.680448
1	1	1	56	31.36	1	9	2	0.581989
1	1	1	51	26.01	1	12	3	0.428073
1	1	1	70	49	1	6	2	0.745467
1	1	1	39	15.21	1	9	4	0.707041
1	1	0	64	40.96	1	0	2	0.571596
1	1	1	53	28.09	1	6	4	0.744231
1	1	0	49	24.01	1	9	3	0
1	1	1	49	24.01	1	6	3	0.621614
1	1	1	24	5.76	0	15	1	0.621614
1	1	1	65	42.25	1	6	2	0.781741
1	1	0	50	25	1	9	4	0.709042
1	1	0	64	40.96	1	6	2	0.679506
1	1	0	54	29.16	1	9	2	0.499181
1	1	0	46	21.16	1	6	3	0.598413
1	1	0	52	27.04	1	6	2	0.304394
1	1	0	40	16	1	12	4	0
1	1	0	36	12.96	1	9	6	0.779119
1	1	0	35	12.25	1	6	6	0.558245
0	0	0	50	25	1	6	4	0.91363
1	1	1	45	20.25	1	9	4	0.768143
1	1	0	42	17.64	1	15	3	0.640856
1	1	0	53	28.09	1	9	5	0.777769
1	1	1	66	43.56	1	0	6	0.746943
1	1	0	61	37.21	1	12	2	0.59897
1	1	0	50	25	0	6	3	0.816494
1	1	0	54	29.16	1	6	5	0.744908
1	1	0	28	7.84	1	12	5	0.633074
1	1	0	50	25	1	0	4	0.698064
1	1	1	64	40.96	1	6	2	0.678264
1	1	0	53	28.09	1	6	2	0.77181
1	1	0	50	25	1	0	3	0.762342
1	1	1	30	9	1	9	5	0.815143
1	1	1	43	18.49	1	9	4	0.722323
1	1	1	63	39.69	1	0	3	0.873049
1	1	1	68	46.24	1	0	5	0
0	0	1	52	27.04	0	9	1	1.04094
1	1	1	53	28.09	0	0	1	0.629488
1	1	1	38	14.44	1	9	5	0.618085
1	1	1	48	23.04	1	0	4	0.713586
1	1	1	28	7.84	1	9	5	0.747661
1	1	1	70	49	1	0	2	0.706621
1	1	0	53	28.09	1	6	2	0
1	1	0	24	5.76	1	6	2	0.558997
1	1	1	27	7.29	0	13	3	0.707957
1	1	1	35	12.25	1	9	3	0.89215
1	1	1	56	31.36	1	6	2	1.22307
0	0	1	70	49	1	6	5	1.1259
1	1	1	52	27.04	1	6	3	0.878716
1	1	1	72	51.84	1	0	2	0.848869
1	1	1	57	32.49	1	12	3	0.774102
1	1	1	44	19.36	1	6	4	0.433878
1	1	1	39	15.21	1	6	2	0
1	1	1	52	27.04	1	0	4	0.572913
1	1	1	50	25	1	9	5	0
1	1	0	63	39.69	0	0	5	0.625992
1	1	1	78	60.84	0	6	1	0.436991
1	1	1	38	14.44	1	9	3	0.941382
1	1	1	64	40.96	1	0	2	0.723567
1	1	0	32	10.24	1	16	6	0.520412
1	1	0	43	18.49	1	0	5	0.733759
1	1	0	50	25	1	0	6	0.945705
1	1	0	55	30.25	1	6	4	3.47712
1	1	1	54	29.16	1	12	7	0.653871
0	1	1	52	27.04	1	0	5	0.923852
1	1	0	51	26.01	0	0	2	0.325222
1	1	1	50	25	0	0	5	0.693918
1	1	1	46	21.16	1	9	8	0.693272
1	1	1	24	5.76	1	9	5	0.789528
1	1	1	50	25	1	0	2	0.709102
1	1	1	62	38.44	1	0	4	1.08537
0	0	1	24	5.76	0	15	4	1.17839
1	1	1	23	5.29	0	9	5	0.850379
1	1	1	48	23.04	1	0	3	0.725072
1	1	1	31	9.61	0	0	2	0.790242
1	1	1	71	50.41	1	9	2	0.930608
1	1	1	49	24.01	1	0	2	0.894541
1	1	1	50	25	0	15	1	0.894541
1	1	1	66	43.56	1	6	8	0.830915
1	1	0	49	24.01	0	6	1	0.713586
1	1	0	32	10.24	0	12	3	0.965315
1	1	1	56	31.36	1	6	2	0.990883
1	1	1	63	39.69	1	9	3	0.749704
1	1	1	50	25	1	15	2	0.749704
1	1	1	50	25	0	0	4	0
1	1	1	66	43.56	1	9	2	0.650301
1	1	1	50	25	0	16	3	0.705435
1	1	1	48	23.04	0	9	1	0
1	1	1	50	25	0	0	1	0
1	1	1	28	7.84	1	9	6	0.946251
1	1	0	36	12.96	0	9	5	0.65889
0	1	1	66	43.56	1	9	2	1.09068
1	1	1	59	34.81	1	0	2	0.872165
1	1	1	50	25	1	9	3	0.872165
1	1	1	36	12.96	0	9	4	0.728714
1	1	1	59	34.81	1	12	2	0.887385
1	1	0	50	25	1	0	4	2.69897
1	1	0	34	11.56	1	16	1	2.69897
1	1	1	46	21.16	1	0	4	0.784519
1	1	1	69	47.61	1	9	2	0.784519
1	1	0	54	29.16	1	0	2	0.729227
1	1	0	50	25	0	0	1	0.729227
1	1	1	65	42.25	1	0	4	0.716931
1	1	1	74	54.76	1	9	2	0.882256
1	1	1	50	25	0	0	2	0.569374
0	0	1	56	31.36	0	0	2	1.13475
1	1	1	50	25	0	0	2	0.851822
1	1	1	69	47.61	1	0	2	0.874165
1	1	1	54	29.16	1	6	3	0.660771
1	1	0	54	29.16	1	12	2	0.729847
1	1	1	50	25	1	9	3	0.615415
1	1	1	20	4	0	15	1	0.615415
1	1	1	59	34.81	1	0	2	0.723639
1	1	1	39	15.21	1	0	2	0
1	1	1	53	28.09	1	9	4	0.578016
1	1	1	56	31.36	1	6	2	0.730556
1	1	1	40	16	1	6	4	0.714514
1	1	1	43	18.49	1	9	3	0
1	1	0	50	25	1	9	5	0
1	1	0	30	9	1	0	3	0
1	1	1	43	18.49	1	6	3	0.878941
0	1	1	18	3.24	0	15	1	0.878941
1	1	0	53	28.09	1	6	5	0.523211
1	1	0	49	24.01	1	6	2	0
1	1	0	25	6.25	1	0	2	0
1	1	0	50	25	0	0	2	2.77815
1	1	1	64	40.96	1	6	2	0.744264
1	1	1	44	19.36	1	0	4	0.657222
1	1	0	64	40.96	1	0	6	4
0	1	0	39	15.21	1	9	2	4
1	1	0	31	9.61	1	9	4	0.475225
1	1	1	34	11.56	1	6	3	0.834303
1	1	1	27	7.29	0	9	3	0.690859
1	1	1	30	9	1	6	3	0.690859
1	1	1	48	23.04	1	0	4	0.730133
1	1	1	65	42.25	1	0	2	1.17572
0	0	1	56	31.36	1	0	3	1.08346
1	1	1	38	14.44	0	9	4	0.882543
1	1	1	50	25	0	6	3	0.62474
1	1	0	40	16	1	9	3	0
1	1	0	50	25	1	9	2	0.717294
1	1	0	50	25	1	0	3	0.843091
1	1	1	49	24.01	1	12	2	0
1	1	1	50	25	0	19	1	0
1	1	1	50	25	0	0	2	0.827887
0	1	0	60	36	1	9	5	0.888212
1	1	0	67	44.89	1	0	2	0.559272
1	1	0	50	25	1	6	7	0.705033
1	1	1	52	27.04	1	6	4	3.69897
1	1	1	43	18.49	1	0	3	0.77418
1	1	1	47	22.09	1	6	3	0.753519
1	1	1	80	64	0	0	1	0.753519
1	1	1	31	9.61	1	9	5	0.732328
0	1	0	54	29.16	1	6	2	1.08138
1	1	1	64	40.96	1	0	2	0.907601
1	1	1	30	9	1	6	5	0.6544
1	1	0	45	20.25	1	6	6	0.846016
1	1	0	34	11.56	1	9	4	0.90891
1	1	1	44	19.36	1	9	4	0.564431
1	1	1	50	25	0	14	1	0.564431
1	1	1	39	15.21	1	9	5	0.752095
1	1	1	39	15.21	1	9	3	0.752095
1	1	1	84	70.56	0	0	1	0.742322
1	1	1	51	26.01	1	9	3	0.604437
1	1	1	76	57.76	0	0	1	0.842696
1	1	1	63	39.69	1	0	5	0.846907
1	1	1	50	25	0	0	2	0.680012
1	1	1	50	25	1	9	3	0
1	1	1	39	15.21	1	12	4	0.662787
1	1	1	26	6.76	1	0	4	0.510541
1	1	0	50	25	0	0	7	3.68663
1	1	1	50	25	0	0	3	0.575164
1	1	1	50	25	1	6	5	0.512191
1	1	1	25	6.25	1	9	3	0.69434
1	1	0	49	24.01	1	6	3	0.578861
1	1	0	28	7.84	1	15	3	3.77815
1	1	0	50	25	1	9	2	0
1	1	1	30	9	1	12	3	0.663115
1	1	1	50	25	0	0	6	3
1	1	0	56	31.36	1	9	2	0.760528
1	1	0	64	40.96	1	6	2	0.986405
1	1	0	54	29.16	1	15	2	0.763446
1	1	1	50	25	1	15	2	0.635461
1	1	1	51	26.01	1	0	3	0.671973
1	1	0	33	10.89	1	9	3	0.621536
1	1	0	62	38.44	1	12	1	0.749092
1	1	1	31	9.61	0	15	5	0.654949
0	0	1	68	46.24	1	9	2	0.975455
1	1	1	45	20.25	1	6	2	0.862783
0	0	0	55	30.25	1	12	4	0.990562
1	1	1	67	44.89	1	9	2	0.674188
1	1	1	39	15.21	1	9	5	0.824871
1	1	1	50	25	0	15	1	0.729733
1	1	0	60	36	1	12	2	0.598063
1	1	1	50	25	0	16	3	0.707545
1	1	1	28	7.84	1	16	4	0.837956
1	1	1	68	46.24	1	9	2	0.603321
1	1	1	78	60.84	1	0	4	0.76498
1	1	0	50	25	1	0	2	0.861882
1	1	1	50	25	1	6	2	0.803571
1	1	1	69	47.61	1	0	2	0.94912
0	0	1	56	31.36	1	6	2	0.949107
1	1	0	66	43.56	0	9	1	0.859264
1	1	0	49	24.01	1	9	4	0
1	1	1	48	23.04	0	6	5	0.869794
1	1	1	36	12.96	1	9	5	0.663311
1	1	1	64	40.96	1	0	5	0.732945
1	1	1	52	27.04	1	6	5	0.696821
1	1	0	49	24.01	1	0	3	0.767077
1	1	1	41	16.81	0	9	3	0.536384
1	1	1	63	39.69	1	0	3	0.670093
1	1	1	56	31.36	0	6	2	0
0	0	1	65	42.25	1	0	2	1.32858
1	1	1	67	44.89	1	0	3	0.864247
1	1	0	30	9	1	6	3	0
1	1	0	50	25	1	9	3	0
0	1	1	66	43.56	1	0	2	1.17315
1	1	1	50	25	0	9	4	0
1	1	1	24	5.76	0	12	4	0
1	1	0	60	36	0	9	2	0.694088
1	1	0	50	25	1	6	3	0.77181
1	1	1	41	16.81	1	6	5	0
0	1	0	48	23.04	1	0	2	0.857861
1	1	0	82	67.24	0	0	1	0
1	1	0	25	6.25	1	9	3	0.924743
1	1	0	40	16	1	0	6	1.19855
1	1	1	49	24.01	1	0	3	0
1	1	0	63	39.69	1	0	2	0
1	1	1	66	43.56	0	6	1	0.818537
1	1	0	62	38.44	1	12	2	0.787187
0	1	0	86	73.96	1	0	3	0.960669
0	0	0	80	64	0	0	1	1
1	1	0	47	22.09	1	9	2	0
1	1	0	73	53.29	1	0	4	0.90744
1	1	1	30	9	1	16	5	0.665149
1	1	0	46	21.16	1	6	3	0.662036
1	1	0	72	51.84	1	6	2	0.717294
1	1	0	60	36	0	12	2	0
1	1	0	50	25	0	0	2	0.808439
1	1	0	61	37.21	1	6	2	0.831447
1	1	0	45	20.25	1	6	4	0.909517
1	1	0	40	16	1	9	3	0.759662
1	1	0	81	65.61	1	0	2	0.801473
0	0	0	75	56.25	0	0	1	0.880788
0	0	0	69	47.61	1	9	2	0.977584
1	1	1	50	25	1	15	4	0.483475
1	1	1	43	18.49	1	12	3	0.562282
0	1	1	69	47.61	1	9	4	0.934125
1	1	1	40	16	0	6	5	0
1	1	1	50	25	0	9	3	0.844473
0	0	1	50	25	0	9	2	0.87777
1	1	1	50	25	1	0	6	0.763472
1	1	1	50	25	1	9	2	0
1	1	1	73	53.29	1	6	2	1.0409
1	1	1	50	25	1	6	2	0
1	1	1	45	20.25	1	9	2	0
1	1	1	24	5.76	0	15	1	0
1	1	0	50	25	0	16	3	0
1	1	0	85	72.25	0	0	1	0
1	1	1	37	13.69	1	9	3	0.665945
1	1	1	65	42.25	1	6	2	0.665945
1	1	0	61	37.21	1	6	2	0.841069
1	1	1	63	39.69	0	0	2	0.752182
1	1	0	26	6.76	0	16	5	0.739744
1	1	1	45	20.25	1	9	3	0.606991
1	1	0	50	25	1	9	2	0.594938
1	1	0	50	25	1	9	3	0
0	1	1	59	34.81	1	9	2	0.875753
1	1	1	30	9	1	9	6	0
1	1	0	26	6.76	1	0	10	0.547733
1	1	1	44	19.36	1	0	6	0.875345
1	1	0	33	10.89	1	12	6	0.493044
1	1	1	50	25	0	0	5	0.972892
1	1	1	50	25	0	0	3	0.701011
1	1	1	50	25	1	9	3	1.12904
1	1	1	50	25	1	9	10	0.574787
1	1	1	39	15.21	1	6	4	0.941284
1	1	1	57	32.49	1	9	4	0.654225
1	1	0	50	25	1	9	3	3.8451
1	1	1	25	6.25	1	12	3	0.450125
1	1	0	35	12.25	1	15	5	0
1	1	0	50	25	1	6	4	0.625497
1	1	0	27	7.29	0	16	6	0.730307
1	1	0	50	25	1	0	10	0.8714
1	1	0	50	25	1	0	4	0.544083
1	1	0	64	40.96	1	9	4	0.544083
1	1	1	50	25	0	0	5	0.868771
1	1	1	24	5.76	1	0	6	0.530405
1	1	1	31	9.61	1	0	2	0.639775
1	1	1	37	13.69	1	9	4	0.90654
1	1	0	58	33.64	1	6	10	0.534036
1	1	1	45	20.25	1	9	6	0.585322
1	1	1	50	25	1	0	5	0.826835
1	1	1	29	8.41	1	6	10	0.794109
1	1	0	50	25	1	0	10	0
1	1	1	29	8.41	1	6	4	0.616412
1	1	1	21	4.41	1	9	7	0.842097
1	1	1	50	25	0	0	7	0.754407
1	1	1	50	25	1	12	7	0.72619
1	1	1	30	9	1	6	4	0
1	1	1	64	40.96	1	12	6	0.593071
1	1	0	50	25	0	0	3	1.0521
1	1	1	50	25	1	9	5	0.798836
1	1	1	50	25	1	9	4	0.798836
1	1	1	62	38.44	0	0	3	0.364106
1	1	1	24	5.76	1	9	4	0.556927
1	1	1	50	25	0	0	3	0.696239
0	0	1	31	9.61	1	9	2	0.944636
0	1	1	55	30.25	0	0	4	0.944636
1	1	1	50	25	1	9	3	0.854131
1	1	0	50	25	1	9	4	0.628065
1	1	0	33	10.89	1	6	4	0.64636
1	1	1	29	8.41	1	12	6	0.6711
1	1	0	30	9	1	12	6	0.701046
1	1	1	30	9	1	0	7	0.625537
1	1	1	33	10.89	1	9	5	1.13793
1	1	1	50	25	1	6	5	0.658793
1	1	0	50	25	1	9	5	0.588572
1	1	1	61	37.21	0	0	5	2.69897
1	1	0	50	25	0	0	5	0.825257
1	1	0	22	4.84	1	0	5	0.888415
1	1	0	26	6.76	1	0	3	0
1	1	0	33	10.89	1	9	5	3.51851
1	1	0	50	25	0	0	5	3.17609
1	1	0	50	25	1	9	3	0.655527
1	1	0	50	25	1	9	2	3.60206
1	1	0	30	9	1	12	3	0.73643
1	1	0	39	15.21	1	9	3	0.815812
1	1	0	69	47.61	1	6	2	0.806395
1	1	1	56	31.36	1	0	2	0.850965
0	0	0	73	53.29	1	6	2	1.02375
1	1	0	88	77.44	0	0	1	0.840954
1	1	1	58	33.64	1	9	2	0.670073
1	1	0	29	8.41	0	15	3	0.695424
1	1	0	72	51.84	1	0	2	0.662036
1	1	0	63	39.69	1	6	2	0.502226
1	1	0	41	16.81	1	9	5	2.8451
1	1	0	63	39.69	1	6	2	0.548791
0	0	0	75	56.25	1	6	2	1.11755
1	1	0	33	10.89	1	15	6	0.694749
1	1	0	50	25	1	9	2	0.651882
1	1	1	38	14.44	1	9	6	0.700849
1	1	0	71	50.41	0	6	1	0.650962
1	1	0	23	5.29	0	15	5	0.823371
1	1	0	39	15.21	1	15	4	0
1	1	0	46	21.16	1	9	7	0.656881
1	1	1	50	25	0	9	3	0.607077
1	1	0	50	25	1	15	5	0.680041
1	1	1	42	17.64	1	9	5	0.711978
1	1	1	50	25	1	15	5	0.612204
1	1	0	50	25	1	9	5	0.727642
1	1	0	60	36	1	9	2	0.451279
1	1	1	68	46.24	1	0	3	0.710858
1	1	0	79	62.41	0	6	1	0.57104
1	1	0	42	17.64	1	9	4	0.847903
1	1	0	45	20.25	1	6	3	0.665306
1	1	0	70	49	1	6	5	0
1	1	1	53	28.09	1	0	4	0.815771
1	1	0	72	51.84	0	0	3	0.485024
1	1	1	50	25	0	0	1	0.457654
1	1	0	68	46.24	1	6	2	0.468611
1	1	0	71	50.41	1	6	2	0.601178
1	1	0	61	37.21	1	9	3	0.671786
1	1	0	32	10.24	1	15	4	0.678124
1	1	0	48	23.04	1	9	5	0.724684
1	1	0	64	40.96	1	6	5	0
1	1	0	49	24.01	1	6	5	0.619183
1	1	0	52	27.04	0	6	2	0.790566
1	1	0	59	34.81	1	9	3	0.770725
1	1	1	72	51.84	1	9	2	0.805451
1	1	1	73	53.29	1	9	5	0.629434
1	1	1	74	54.76	1	9	3	0.506231
1	1	1	50	25	1	6	2	0.637793
1	1	1	50	25	1	9	5	0.50782
1	1	1	71	50.41	0	0	2	0.860042
1	1	1	55	30.25	1	6	2	0.587085
1	1	1	50	25	0	0	1	0.587085
0	0	0	48	23.04	1	12	1	0.802776
0	1	1	64	40.96	1	0	1	0.830972
1	1	1	35	12.25	1	9	4	0.830972
1	1	1	72	51.84	0	0	2	0.81375
1	1	1	54	29.16	1	6	2	0.72633
1	1	1	41	16.81	1	9	5	0.752096
1	1	1	70	49	1	0	6	0.806155
1	1	1	22	4.84	0	12	3	0.75441
1	1	1	24	5.76	1	15	2	0.75441
1	1	1	43	18.49	1	16	5	0.726122
1	1	1	50	25	0	0	6	0.568051
1	1	1	45	20.25	1	6	6	0.663015
1	1	1	28	7.84	1	9	7	0.547728
1	1	1	22	4.84	0	0	6	0.728713
1	1	1	50	25	0	16	3	0.511133
0	1	0	50	25	1	12	3	4.25527
1	1	0	50	25	0	0	1	0.870042
1	1	0	49	24.01	1	12	3	0.76115
1	1	0	59	34.81	1	6	6	0.635659
0	1	0	50	25	0	0	3	0.991921
1	1	0	62	38.44	1	6	2	0.756165
1	1	0	50	25	0	0	6	0.807817
1	1	0	50	25	0	0	7	0.7506
1	1	0	74	54.76	1	6	3	1.14454
1	1	0	50	25	0	0	4	0.955219
1	1	0	63	39.69	1	9	7	2.47712
1	1	0	50	25	0	0	3	0.69646
0	0	0	62	38.44	1	0	2	2.1609
1	1	0	50	25	0	9	4	0.651882
1	1	0	49	24.01	1	6	5	0.635475
1	1	0	70	49	1	6	2	0.709409
1	1	0	47	22.09	1	9	3	0.569359
1	1	0	42	17.64	1	9	3	0.573394
1	1	0	44	19.36	1	9	3	0.505798
1	1	1	25	6.25	0	12	3	3
1	1	1	45	20.25	1	15	5	0.542547
1	1	0	74	54.76	1	12	2	0.761998
1	1	0	30	9	1	15	5	0.670835
1	1	0	45	20.25	1	12	3	0.610524
1	1	1	72	51.84	1	0	2	0.781628
1	1	0	22	4.84	0	16	1	0.610524
0	0	0	37	13.69	1	15	5	0.939238
1	1	0	31	9.61	1	12	5	0
1	1	0	26	6.76	1	16	5	0
1	1	0	29	8.41	1	15	6	0.679588
1	1	0	38	14.44	1	12	6	0.820503
1	1	0	40	16	1	9	4	0.685865
1	1	0	42	17.64	0	9	3	0.820921
1	1	0	31	9.61	0	12	3	0.745918
1	1	0	35	12.25	1	9	5	3.30103
1	1	1	55	30.25	1	9	5	0.705036
1	1	1	64	40.96	1	0	2	0.617202
1	1	1	52	27.04	1	12	3	0.521723
1	1	1	73	53.29	1	0	2	0.521723
1	1	0	24	5.76	0	12	4	0.651119
1	1	1	55	30.25	1	9	3	0.734289
1	1	1	51	26.01	1	0	3	0.815094
1	1	1	63	39.69	1	6	2	0.635683
1	1	1	66	43.56	1	0	2	0.556065
1	1	0	43	18.49	1	9	5	0.732763
0	0	0	50	25	1	9	4	1.56026
1	1	0	47	22.09	1	12	4	0.780303
1	1	1	55	30.25	1	9	5	3.8451
1	1	1	50	25	1	6	4	0.633828
1	1	1	41	16.81	1	9	5	0.738358
1	1	1	51	26.01	1	9	6	0.676716
1	1	0	33	10.89	1	16	5	0
1	1	0	52	27.04	1	6	2	0
1	1	0	33	10.89	1	12	8	0.598174
1	1	0	86	73.96	1	0	2	0.823941
1	1	0	49	24.01	1	9	4	0.734165
1	1	0	47	22.09	1	6	3	0.660206
1	1	1	81	65.61	1	6	2	1.20819
1	1	1	71	50.41	1	6	3	0.715286
1	1	0	50	25	0	0	2	0
1	1	1	23	5.29	1	12	4	0.715286
1	1	1	38	14.44	1	9	5	0.807533
1	1	1	39	15.21	1	12	6	0.816502
1	1	1	62	38.44	0	9	2	0.697156
1	1	1	36	12.96	1	15	4	0.738074
1	1	0	50	25	1	6	2	3.8451
1	1	0	32	10.24	1	9	7	0.790846
0	1	1	50	25	1	9	2	0.851329
1	1	0	71	50.41	1	6	2	0.803279
1	1	1	49	24.01	1	9	4	0.925513
0	0	0	56	31.36	1	9	2	0.870261
0	0	0	27	7.29	0	16	1	0.870261
0	1	0	59	34.81	1	0	2	1.05872
1	1	0	50	25	1	6	2	0.677126
1	1	0	50	25	0	15	4	0.677126
1	1	0	30	9	0	9	3	0.689373
0	1	0	65	42.25	1	0	2	0.8154
1	1	1	57	32.49	0	12	2	0.669857
1	1	0	36	12.96	1	0	6	0.60626
1	1	0	53	28.09	1	9	3	0.621208
1	1	0	70	49	0	0	1	0.78178
1	1	0	27	7.29	0	16	4	3
1	1	0	49	24.01	1	9	2	0.699963
1	1	1	50	25	1	6	5	0.479344
0	0	1	53	28.09	1	9	3	1.0363
1	1	1	43	18.49	1	9	3	0.643999
1	1	0	50	25	0	0	3	0
1	1	1	71	50.41	0	0	4	0.996592
1	1	0	69	47.61	0	0	4	0.718925
1	1	1	82	67.24	0	6	2	0.57661
1	1	1	53	28.09	1	0	2	0.584865
1	1	1	50	25	0	0	1	0.584865
1	1	1	59	34.81	1	9	2	0.636499
1	1	1	27	7.29	0	16	3	3
1	1	0	52	27.04	1	9	6	0.652939
1	1	1	27	7.29	0	16	4	0.459153
0	0	0	44	19.36	1	16	6	0.963357
1	1	1	54	29.16	0	0	1	0.608789
1	1	1	24	5.76	0	16	1	0.608789
1	1	0	57	32.49	1	9	2	0.617202
1	1	0	55	30.25	1	12	2	0.787799
1	1	0	50	25	1	0	2	0.527974
1	1	0	50	25	1	6	4	0.429989
1	1	0	50	25	1	9	2	0.727137
1	1	0	53	28.09	1	9	4	0.469302
1	1	0	32	10.24	1	15	5	0.754416
0	1	0	43	18.49	1	9	6	0.955295
0	0	0	50	25	1	12	2	0.921737
0	0	0	50	25	1	0	3	0.921737
1	1	0	50	25	1	9	2	0
1	1	0	51	26.01	1	9	4	0.852756
0	0	0	78	60.84	1	0	3	1.12077
0	1	0	56	31.36	0	0	1	0.693177
1	1	1	65	42.25	1	0	2	0.556299
1	1	0	49	24.01	1	6	2	3
1	1	0	47	22.09	1	9	2	0.75987
1	1	1	27	7.29	1	16	2	0.795823
1	1	0	41	16.81	1	9	6	0.603673
1	1	0	50	25	1	15	4	3.8451
0	1	0	34	11.56	1	15	5	0.858712
1	1	0	49	24.01	1	0	3	0.754061
1	1	1	39	15.21	1	9	5	0.706201
1	1	0	67	44.89	1	6	6	0.601529
1	1	0	50	25	1	12	8	0.902077
1	1	0	50	25	1	0	5	0.668731
1	1	0	51	26.01	1	0	5	0.611184
1	1	0	41	16.81	1	15	4	0.64624
1	1	0	49	24.01	1	9	4	0
1	1	0	26	6.76	1	9	5	0
1	1	1	50	25	1	15	6	0.904631
1	1	0	36	12.96	1	12	6	0.565761
1	1	0	53	28.09	1	6	3	0.789372
1	1	1	50	25	0	0	3	0.742598
1	1	0	46	21.16	1	6	6	0.684898
1	1	0	33	10.89	1	12	6	0.619547
1	1	0	31	9.61	0	15	3	0.771629
1	1	1	50	25	1	0	6	0
1	1	0	36	12.96	1	9	3	0.833772
1	1	0	50	25	0	0	1	2.95424
1	1	0	45	20.25	1	6	3	0
1	1	1	78	60.84	0	0	1	0.790686
1	1	1	72	51.84	1	0	2	0.489519
1	1	0	39	15.21	1	9	3	0.849695
1	1	1	40	16	1	9	3	0.448962
1	1	1	71	50.41	0	0	1	0
1	1	1	50	25	0	16	3	0.513306
1	1	1	51	26.01	1	0	6	0.660069
1	1	0	47	22.09	1	6	4	0
1	1	1	55	30.25	1	9	10	0.91903
1	1	0	50	25	0	12	4	3
1	1	1	51	26.01	1	0	3	0.585975
1	1	1	41	16.81	1	9	6	0.682898
1	1	1	33	10.89	1	9	3	0.527809
1	1	1	38	14.44	1	0	5	0.80177
1	1	0	47	22.09	1	6	3	0.506352
0	0	1	68	46.24	0	0	1	0.959749
0	1	1	70	49	1	0	2	1.06762
1	1	1	64	40.96	1	0	3	0.799245
1	1	0	61	37.21	1	0	8	0
1	1	0	50	25	0	0	3	0
1	1	1	35	12.25	1	9	6	0.547603
1	1	1	67	44.89	0	0	1	0.627918
1	1	1	50	25	1	12	5	0.66704
1	1	1	67	44.89	0	0	1	0.654271
1	1	1	75	56.25	1	6	2	0
1	1	1	50	25	1	0	2	0.624264
1	1	0	74	54.76	1	0	6	0.773043
1	1	1	50	25	1	0	3	0.701586
1	1	1	66	43.56	1	0	1	0
0	1	1	75	56.25	1	0	2	0.97693
1	1	1	42	17.64	1	6	4	0.626176
1	1	1	48	23.04	1	9	4	0
1	1	1	66	43.56	1	0	2	0.788835
0	0	1	73	53.29	0	0	2	1.00967
1	1	1	72	51.84	1	9	3	0.714819
1	1	0	50	25	0	0	1	0.412788
0	1	0	50	25	1	0	5	1.26482
0	1	0	50	25	1	6	5	1.26482
1	1	0	50	25	0	16	3	0.58647
0	1	0	49	24.01	1	0	6	0.88758
1	1	0	50	25	1	6	3	0.58647
1	1	0	50	25	0	6	2	0
1	1	1	50	25	1	16	3	0.584424
1	1	1	50	25	1	6	2	0.854943
1	1	1	52	27.04	1	9	7	0.742178
1	1	1	66	43.56	1	0	4	0.785522
1	1	1	50	25	1	9	5	0.814065
1	1	0	53	28.09	1	9	4	2.69897
1	1	1	40	16	1	0	3	1.04773
1	1	1	33	10.89	1	12	6	0.753623
1	1	1	50	25	0	0	6	0.72619
1	1	1	50	25	1	0	3	1.05178
1	1	1	50	25	1	12	8	0.627821
1	1	1	28	7.84	1	16	1	0.627821
1	1	1	34	11.56	1	0	6	0.788884
1	1	1	50	25	1	0	2	0.480779
1	1	1	63	39.69	1	6	6	0.833651
1	1	1	50	25	1	6	4	0.617949
1	1	1	63	39.69	1	6	2	0.56915
1	1	1	50	25	1	6	5	0.525194
1	1	1	54	29.16	1	9	2	0.830015
1	1	1	56	31.36	1	9	2	0
1	1	1	50	25	1	0	5	0.688328
1	1	1	50	25	0	0	4	0.666499
1	1	1	46	21.16	1	6	5	0.594394
1	1	1	42	17.64	1	0	4	0.776392
1	1	0	33	10.89	1	9	4	3
1	1	1	50	25	1	12	4	0.739916
1	1	1	51	26.01	1	15	3	0.587875
1	1	0	43	18.49	1	9	5	0.804779
1	1	1	39	15.21	1	16	5	0.741388
1	1	1	59	34.81	1	12	2	0.690312
0	0	0	50	25	1	6	2	4.39794
1	1	0	50	25	1	0	2	0
1	1	1	50	25	0	6	3	0.817599
1	1	0	24	5.76	0	12	3	0
1	1	1	65	42.25	1	6	2	0.964094
1	1	1	50	25	1	6	2	0.571063
1	1	1	50	25	1	9	4	0.884311
1	1	1	28	7.84	1	9	6	0.660367
1	1	1	50	25	0	0	1	0.660367
1	1	1	50	25	1	0	3	0.743536
1	1	1	28	7.84	1	15	5	0.608641
0	0	1	50	25	0	0	1	0.817484
1	1	1	53	28.09	1	6	7	0.495143
1	1	0	40	16	1	6	6	0.455515
1	1	1	50	25	1	9	2	0.630326
1	1	1	50	25	1	9	3	0.630326
1	1	0	33	10.89	1	6	6	0.489688
1	1	1	66	43.56	1	6	2	0.45073
1	1	0	38	14.44	1	6	6	0.58119
1	1	0	31	9.61	1	9	3	0.702501
1	1	0	53	28.09	1	9	5	0.702501
1	1	0	51	26.01	1	6	3	0.62402
1	1	0	42	17.64	1	6	5	0.801988
1	1	0	41	16.81	1	0	6	0.635481
1	1	1	74	54.76	1	0	2	0.802913
1	1	0	50	25	1	0	6	1.07985
1	1	1	61	37.21	1	0	13	0.74183
1	1	0	61	37.21	1	0	5	0.956209
1	1	0	61	37.21	1	6	2	0.993496
1	1	1	50	25	1	6	4	0
1	1	1	62	38.44	1	6	1	0.767494
0	0	0	50	25	1	0	3	1.04153
1	1	0	50	25	1	14	4	3.90309
1	1	0	50	25	1	14	2	3.90309
1	1	0	34	11.56	1	9	2	3.90309
1	1	0	50	25	1	0	4	3.30103
1	1	0	30	9	1	9	4	3.30103
1	1	0	44	19.36	1	6	4	0.590359
1	1	0	71	50.41	1	6	2	0.765486
1	1	0	42	17.64	1	12	4	4
1	1	0	50	25	1	9	7	0.857731
1	1	0	37	13.69	1	9	5	3.30103
1	1	0	45	20.25	1	6	4	0
1	1	0	50	25	0	0	3	0.619183
1	1	0	35	12.25	1	9	5	3.90309
1	1	1	41	16.81	1	0	9	0.744681
1	1	1	69	47.61	1	6	2	0.723567
0	0	1	30	9	1	0	4	0.993917
1	1	0	33	10.89	1	6	5	1.95136
1	1	0	50	25	1	6	4	0.716389
1	1	0	50	25	0	0	4	3
1	1	0	50	25	1	12	5	1.11154
1	1	0	50	25	1	12	5	1.11154
1	1	0	50	25	1	12	1	0
1	1	1	50	25	0	12	7	0.755536
1	1	1	61	37.21	1	0	4	0.735631
1	1	1	56	31.36	1	6	4	0.892655
1	1	1	54	29.16	1	9	2	0.685339
1	1	1	46	21.16	0	9	4	0
1	1	1	77	59.29	1	0	2	0.783828
1	1	1	68	46.24	1	6	3	0.769963
1	1	1	50	25	1	12	5	0.735629
1	1	1	74	54.76	0	0	5	0.86079
1	1	1	50	25	1	0	5	0.566016
1	1	1	55	30.25	0	6	5	0
1	1	1	57	32.49	1	9	2	0.581919
1	1	1	31	9.61	1	15	2	0.581919
1	1	1	56	31.36	1	6	2	0
1	1	0	48	23.04	1	0	3	3.30103
1	1	1	35	12.25	1	6	4	0.815058
1	1	1	64	40.96	1	6	2	0.771117
1	1	1	65	42.25	1	6	2	1.1363
1	1	1	78	60.84	0	0	2	0.733168
1	1	1	28	7.84	0	9	3	0.486073
1	1	1	71	50.41	1	0	7	0.975366
[truncated: 3,755 more rows]

## Sheet: E_H data 
2018	family total income/year	expenditure for health care	log income-healrth	log health	EdI_health	2016	family total income/year	expenditure for health care	log income-healrth	log health	EdI_health	2014	family total income/year	expenditure for health care	log income-healrth	log health	EdI_health
	720140	5000	5.85742	3.69897	0.631502		55000	8000	4.74036	3.90309	0.823374		211090	3000	5.32447	3.47712	0.653046
	70000	5000	4.8451	3.69897	0.763446		50000	21000	4.69897	4.32222	0.919823		0	200	1	2.30103	2.30103
	60000	120000	4.77815	5.07918	1.063		60000	1000	4.77815	3	0.627858		27500	500	4.43933	2.69897	0.607968
	41500	120000	4.61805	5.07918	1.09985		80000	2600	4.90309	3.41497	0.696494		26120	9500	4.41697	3.97772	0.900554
	20000	5000	4.30103	3.69897	0.86002		34700	800	4.54033	2.90309	0.639401		56800	500	4.75435	2.69897	0.567685
	20350	120000	4.30856	5.07918	1.17886		10000	5000	4	3.69897	0.924743		1300	15000	3.11394	4.17609	1.34109
	300000	5000	5.47712	3.69897	0.675349		110000	200	5.04139	2.30103	0.456427		90000	5000	4.95424	3.69897	0.746627
	160000	5000	5.20412	3.69897	0.710777		30000	3000	4.47712	3.47712	0.776642		23160	600	4.36474	2.77815	0.636499
	80000	5000	4.90309	3.69897	0.754416		60000	28000	4.77815	4.44716	0.930728		0	8000	1	3.90309	3.90309
	100000	5000	5	3.69897	0.739794		82000	3000	4.91381	3.47712	0.707622		215600	4000	5.33365	3.60206	0.675346
	60000	5000	4.77815	3.69897	0.774143		30000	0	4.47712	0	0		20000	1000	4.30103	3	0.697507
	55000	5000	4.74036	3.69897	0.780314		50000	0	4.69897	0	0		32300	500	4.5092	2.69897	0.598547
	250000	5000	5.39794	3.69897	0.685256		113000	5000	5.05308	3.69897	0.732023		78009	20000	4.89214	4.30103	0.879171
	130300	5000	5.11494	3.69897	0.723169		30000	500	4.47712	2.69897	0.602836		79300	400	4.89927	2.60206	0.531111
	130300	5000	5.11494	3.69897	0.723169		30000	500	4.47712	2.69897	0.602836		79300	400	4.89927	2.60206	0.531111
	57680	120000	4.76103	5.07918	1.06683		25800	5000	4.41162	3.69897	0.838461		63200	4000	4.80072	3.60206	0.750317
	29500	5000	4.46982	3.69897	0.827543		15450	0	4.18893	0	0		0	1500	1	3.17609	3.17609
	90000	5000	4.95424	3.69897	0.746627		80400	3000	4.90526	3.47712	0.708856		110000	2000	5.04139	3.30103	0.654785
	100000	120000	5	5.07918	1.01584		90750	10000	4.95785	4	0.806802		42577	20000	4.62918	4.30103	0.929114
	60000	5000	4.77815	3.69897	0.774143		52000	0	4.716	0	0		20000	16000	4.30103	4.20412	0.977468
	140000	5000	5.14613	3.69897	0.718787		100000	5000	5	3.69897	0.739794		65120	28000	4.81371	4.44716	0.923852
	117900	5000	5.07151	3.69897	0.729362		500000	500	5.69897	2.69897	0.473589		0	1000	1	3	3
	14400	120000	4.15836	5.07918	1.22144		14400	0	4.15836	0	0		65220	500	4.81438	2.69897	0.560606
	2000	5000	3.30103	3.69897	1.12055		37500	145	4.57403	2.16137	0.47253		121400	1000	5.08422	3	0.590061
	90000	5000	4.95424	3.69897	0.746627		63500	0	4.80277	0	0		7705	200	3.88677	2.30103	0.592016
	340000	5000	5.53148	3.69897	0.668713		300000	2000	5.47712	3.30103	0.602694		29005	5000	4.46247	3.69897	0.828906
	60800	120000	4.7839	5.07918	1.06172		40700	5000	4.60959	3.69897	0.80245		210400	1000	5.32305	3	0.563587
	60000	5000	4.77815	3.69897	0.774143		20000	800	4.30103	2.90309	0.674976		50000	80	4.69897	1.90309	0.405002
	40000	5000	4.60206	3.69897	0.803764		40000	500	4.60206	2.69897	0.58647		28700	800	4.45788	2.90309	0.651226
	50200	5000	4.7007	3.69897	0.786897		48400	5000	4.68485	3.69897	0.789561		60400	5000	4.78104	3.69897	0.773675
	24000	5000	4.38021	3.69897	0.844473		18240	1000	4.26102	3	0.704056		17000	2000	4.23045	3.30103	0.780303
	36000	5000	4.5563	3.69897	0.811836		22200	3000	4.34635	3.47712	0.800009		7000	3000	3.8451	3.47712	0.9043
	7600	5000	3.88081	3.69897	0.953143		4000	500	3.60206	2.69897	0.749285		55000	500	4.74036	2.69897	0.569359
	48000	120000	4.68124	5.07918	1.08501		50000	0	4.69897	0	0		126900	1000	5.10346	3	0.587836
	90000	120000	4.95424	5.07918	1.02522		115000	2000	5.0607	3.30103	0.652288		53350	4000	4.72713	3.60206	0.761997
	100000	120000	5	5.07918	1.01584		80000	10000	4.90309	4	0.815812		77000	4000	4.88649	3.60206	0.737147
	37000	120000	4.5682	5.07918	1.11186		40710	4000	4.6097	3.60206	0.781409		50460	3300	4.70295	3.51851	0.748151
	132000	120000	5.12057	5.07918	0.991916		216000	0	5.33445	0	0		84800	1000	4.9284	3	0.608717
	30200	120000	4.48001	5.07918	1.13374		59600	3000	4.77525	3.47712	0.728155		90200	2000	4.95521	3.30103	0.666174
	83600	5000	4.92221	3.69897	0.751486		80000	2000	4.90309	3.30103	0.673255		80105	1000	4.90366	3	0.611788
	26000	120000	4.41497	5.07918	1.15044		30000	3000	4.47712	3.47712	0.776642		37300	0	4.57171	0	0
	30000	5000	4.47712	3.69897	0.826194		40000	400	4.60206	2.60206	0.565412		40340	1500	4.60574	3.17609	0.689595
	101800	5000	5.00775	3.69897	0.738649		40000	6000	4.60206	3.77815	0.82097		62600	10000	4.79657	4	0.833928
	50000	5000	4.69897	3.69897	0.787187		44000	400	4.64345	2.60206	0.560372		52000	0	4.716	0	0
	76000	120000	4.88081	5.07918	1.04064		73600	500	4.86688	2.69897	0.554559		96000	200	4.98227	2.30103	0.461844
	76000	120000	4.88081	5.07918	1.04064		73600	500	4.86688	2.69897	0.554559		96000	200	4.98227	2.30103	0.461844
	10000	5000	4	3.69897	0.924743		70200	10000	4.84634	4	0.825366		3920	10000	3.59329	4	1.11319
	71800	120000	4.85612	5.07918	1.04593		35080	2000	4.54506	3.30103	0.72629		82120	4000	4.91445	3.60206	0.732953
	160800	120000	5.20629	5.07918	0.975586		80000	500	4.90309	2.69897	0.550463		78400	40000	4.89432	4.60206	0.940287
	57600	120000	4.76042	5.07918	1.06696		39700	10000	4.59879	4	0.869794		0	12000	1	4.07918	4.07918
	65560	5000	4.81664	3.69897	0.767957		65000	2000	4.81291	3.30103	0.685869		38100	1500	4.58092	3.17609	0.69333
	80000	120000	4.90309	5.07918	1.03591		24150	13000	4.38292	4.11394	0.938631		11430	200	4.05805	2.30103	0.567029
	50000	5000	4.69897	3.69897	0.787187		55500	12000	4.74429	4.07918	0.859808		38800	2000	4.58883	3.30103	0.719362
	44600	5000	4.64933	3.69897	0.795591		30000	300	4.47712	2.47712	0.553284		6500	0	3.81291	0	0
	40000	5000	4.60206	3.69897	0.803764		50000	1000	4.69897	3	0.638438		0	2000	1	3.30103	3.30103
	35000	120000	4.54407	5.07918	1.11776		15000	1000	4.17609	3	0.718375		32600	1000	4.51322	3	0.664714
	57680	120000	4.76103	5.07918	1.06683		25800	5000	4.41162	3.69897	0.838461		63200	4000	4.80072	3.60206	0.750317
	112000	120000	5.04922	5.07918	1.00593		75000	3000	4.87506	3.47712	0.713247		0	400	1	2.60206	2.60206
	70000	5000	4.8451	3.69897	0.763446		54000	1000	4.73239	3	0.633929		30000	600	4.47712	2.77815	0.620522
	50000	5000	4.69897	3.69897	0.787187		30000	0	4.47712	0	0		40000	2000	4.60206	3.30103	0.717294
	22000	5000	4.34242	3.69897	0.851822		462450	300	5.66506	2.47712	0.437263		0	0	0	0	0
	60000	120000	4.77815	5.07918	1.063		20000	0	4.30103	0	0		56900	0	4.75511	0	0
	14000	120000	4.14613	5.07918	1.22504		10000	0	4	0	0		11300	1500	4.05308	3.17609	0.783624
	17000	5000	4.23045	3.69897	0.874368		23000	0	4.36173	0	0		11300	0	4.05308	0	0
	20000	120000	4.30103	5.07918	1.18092		15000	5500	4.17609	3.74036	0.895661		38800	15000	4.58883	4.17609	0.910055
	55000	120000	4.74036	5.07918	1.07148		25000	3000	4.39794	3.47712	0.790625		92970	90000	4.96834	4.95424	0.997162
	24620	120000	4.39129	5.07918	1.15665		27800	2000	4.44404	3.30103	0.742799		0	2000	1	3.30103	3.30103
	77675	5000	4.89028	3.69897	0.756392		110100	5000	5.04179	3.69897	0.733662		83000	2000	4.91908	3.30103	0.671067
	20000	5000	4.30103	3.69897	0.86002		8000	2400	3.90309	3.38021	0.866035		35600	5500	4.55145	3.74036	0.821796
	17600	5000	4.24551	3.69897	0.871266		30000	5000	4.47712	3.69897	0.826194		29220	10000	4.46568	4	0.89572
	20000	5000	4.30103	3.69897	0.86002		40000	150	4.60206	2.17609	0.472852		14470	2500	4.16047	3.39794	0.816721
	30000	120000	4.47712	5.07918	1.13447		25000	5000	4.39794	3.69897	0.841069		60000	1000	4.77815	3	0.627858
	20000	120000	4.30103	5.07918	1.18092		7700	8000	3.88649	3.90309	1.00427		18820	7000	4.27462	3.8451	0.899518
	11300	120000	4.05308	5.07918	1.25317		10100	20000	4.00432	4.30103	1.0741		0	5000	1	3.69897	3.69897
	17790	120000	4.25018	5.07918	1.19505		80000	15000	4.90309	4.17609	0.851726		7700	5000	3.88649	3.69897	0.951751
	20000	5000	4.30103	3.69897	0.86002		15000	1000	4.17609	3	0.718375		2500	2000	3.39794	3.30103	0.97148
	43000	5000	4.63347	3.69897	0.798316		10000	300	4	2.47712	0.61928		33520	2000	4.5253	3.30103	0.72946
	5000	120000	3.69897	5.07918	1.37313		22500	2000	4.35218	3.30103	0.758477		31750	1000	4.50174	3	0.666408
	40000	120000	4.60206	5.07918	1.10368		30000	10000	4.47712	4	0.893431		10870	10000	4.03623	4	0.991024
	6000	120000	3.77815	5.07918	1.34436		15000	5000	4.17609	3.69897	0.885749		0	7000	1	3.8451	3.8451
	50000	120000	4.69897	5.07918	1.08091		27100	1000	4.43297	3	0.676747		1960	500	3.29226	2.69897	0.819793
	57500	120000	4.75967	5.07918	1.06713		64100	2500	4.80686	3.39794	0.706894		87080	3000	4.93992	3.47712	0.703882
	40000	120000	4.60206	5.07918	1.10368		58440	10000	4.76671	4	0.839153		0	7000	1	3.8451	3.8451
	50000	5000	4.69897	3.69897	0.787187		38350	20000	4.58377	4.30103	0.938318		91085	5000	4.95945	3.69897	0.745843
	11670	5000	4.06707	3.69897	0.909492		15000	0	4.17609	0	0		23310	45000	4.36754	4.65321	1.06541
	80000	120000	4.90309	5.07918	1.03591		40000	10000	4.60206	4	0.869176		156884	20000	5.19558	4.30103	0.827825
	40960	5000	4.61236	3.69897	0.801969		40000	1000	4.60206	3	0.651882		55300	3000	4.74273	3.47712	0.733148
	46760	120000	4.66987	5.07918	1.08765		45160	6000	4.65475	3.77815	0.811676		17710	2000	4.24822	3.30103	0.777039
	10000	120000	4	5.07918	1.2698		15570	2000	4.19229	3.30103	0.787405		0	20000	1	4.30103	4.30103
	8000	5000	3.90309	3.69897	0.947703		22600	500	4.35411	2.69897	0.619867		0	20000	1	4.30103	4.30103
	30000	5000	4.47712	3.69897	0.826194		19590	3600	4.29203	3.5563	0.828582		33960	0	4.53097	0	0
	50000	120000	4.69897	5.07918	1.08091		50000	3000	4.69897	3.47712	0.739975		65080	4000	4.81345	3.60206	0.748333
	20000	120000	4.30103	5.07918	1.18092		40000	500	4.60206	2.69897	0.58647		0	2000	1	3.30103	3.30103
	5000	120000	3.69897	5.07918	1.37313		20000	1000	4.30103	3	0.697507		28300	5000	4.45179	3.69897	0.830896
	94000	120000	4.97313	5.07918	1.02133		63000	2000	4.79934	3.30103	0.687809		5170	400	3.71349	2.60206	0.700705
	35000	5000	4.54407	3.69897	0.814022		61000	2000	4.78533	3.30103	0.689823		21000	1000	4.32222	3	0.694088
	80000	5000	4.90309	3.69897	0.754416		40000	3000	4.60206	3.47712	0.755558		3075	20000	3.48785	4.30103	1.23315
	100000	5000	5	3.69897	0.739794		56600	20000	4.75282	4.30103	0.904943		116067	3000	5.06471	3.47712	0.686539
	75000	5000	4.87506	3.69897	0.758754		68088	5000	4.83307	3.69897	0.765346		127620	1000	5.10592	3	0.587553
	30500	120000	4.4843	5.07918	1.13266		62670	5000	4.79706	3.69897	0.771091		101270	10000	5.00548	4	0.799124
	6080	5000	3.7839	3.69897	0.977554		7500	1000	3.87506	3	0.774181		35768	300	4.55349	2.47712	0.544004
	2000	5000	3.30103	3.69897	1.12055		30000	100	4.47712	2	0.446716		10290	500	4.01242	2.69897	0.672655
	18460	120000	4.26623	5.07918	1.19055		10000	800	4	2.90309	0.725772		8240	1400	3.91593	3.14613	0.803418
	10000	120000	4	5.07918	1.2698		20000	9000	4.30103	3.95424	0.919371		6205	8000	3.79274	3.90309	1.02909
	26000	120000	4.41497	5.07918	1.15044		39020	2000	4.59129	3.30103	0.718977		138014	7000	5.13992	3.8451	0.748085
	45000	5000	4.65321	3.69897	0.794928		20000	16000	4.30103	4.20412	0.977468		12440	4000	4.09482	3.60206	0.879663
	62270	120000	4.79428	5.07918	1.05943		30780	5000	4.48827	3.69897	0.824142		22250	5000	4.34733	3.69897	0.85086
	73000	5000	4.86332	3.69897	0.760585		40000	500	4.60206	2.69897	0.58647		26000	1000	4.41497	3	0.679506
	30176	120000	4.47966	5.07918	1.13383		58070	2600	4.76395	3.41497	0.716836		60480	13000	4.78161	4.11394	0.860367
	30176	120000	4.47966	5.07918	1.13383		58070	2600	4.76395	3.41497	0.716836		60480	13000	4.78161	4.11394	0.860367
	96300	120000	4.98363	5.07918	1.01917		100000	1000	5	3	0.6		62156	12000	4.79348	4.07918	0.850985
	18000	120000	4.25527	5.07918	1.19362		127725	11500	5.10628	4.0607	0.795237		53000	450	4.72428	2.65321	0.561613
	2000	5000	3.30103	3.69897	1.12055		45000	2000	4.65321	3.30103	0.709409		1400	200	3.14613	2.30103	0.731385
	50900	120000	4.70672	5.07918	1.07913		34900	24000	4.54283	4.38021	0.964204		31780	20000	4.50215	4.30103	0.955327
	59100	5000	4.77159	3.69897	0.775207		71300	500	4.85309	2.69897	0.556134		62100	5000	4.79309	3.69897	0.771729
	50000	5000	4.69897	3.69897	0.787187		50000	1000	4.69897	3	0.638438		30000	7000	4.47712	3.8451	0.858833
	2684	120000	3.42878	5.07918	1.48134		10000	500	4	2.69897	0.674743		10659	50	4.02772	1.69897	0.42182
	45570	5000	4.65868	3.69897	0.793995		49800	5000	4.69723	3.69897	0.787479		60700	10000	4.78319	4	0.836262
	36200	120000	4.55871	5.07918	1.11417		52500	6000	4.72016	3.77815	0.800429		118300	3600	5.07298	3.5563	0.701028
	6400	5000	3.80618	3.69897	0.971833		11000	12000	4.04139	4.07918	1.00935		41652	1584	4.61964	3.19976	0.692642
	5000	5000	3.69897	3.69897	1		1500	1000	3.17609	3	0.944557		5050	100000	3.70329	5	1.35015
	700	5000	2.8451	3.69897	1.30012		65000	6000	4.81291	3.77815	0.785003		33000	5000	4.51851	3.69897	0.818625
	40000	120000	4.60206	5.07918	1.10368		42230	10000	4.62562	4	0.864749		400	1000	2.60206	3	1.15293
	10000	120000	4	5.07918	1.2698		67402	15000	4.82867	4.17609	0.864853		58320	2000	4.76582	3.30103	0.692647
	122700	5000	5.08884	3.69897	0.726878		70000	15000	4.8451	4.17609	0.861921		70200	3000	4.84634	3.47712	0.717474
	40000	120000	4.60206	5.07918	1.10368		65000	1000	4.81291	3	0.623323		71000	1000	4.85126	3	0.618396
	155000	120000	5.19033	5.07918	0.978585		130000	2000	5.11394	3.30103	0.645496		100000	1000	5	3	0.6
	160000	5000	5.20412	3.69897	0.710777		85700	1000	4.93298	3	0.608152		60005	2000	4.77819	3.30103	0.690854
	45000	120000	4.65321	5.07918	1.09154		14000	8000	4.14613	3.90309	0.941382		16880	8000	4.22737	3.90309	0.92329
	74150	5000	4.87011	3.69897	0.759525		79900	1000	4.90255	3	0.611927		27220	500	4.43489	2.69897	0.608577
	20000	5000	4.30103	3.69897	0.86002		166860	3000	5.22235	3.47712	0.665815		111700	1000	5.04805	3	0.594289
	60000	5000	4.77815	3.69897	0.774143		81310	1000	4.91014	3	0.61098		68200	2500	4.83378	3.39794	0.702956
	35000	5000	4.54407	3.69897	0.814022		84760	15000	4.92819	4.17609	0.847388		25240	8000	4.40209	3.90309	0.886645
	39500	120000	4.5966	5.07918	1.10499		20000	0	4.30103	0	0		37000	200	4.5682	2.30103	0.503706
	33800	120000	4.52892	5.07918	1.1215		41307	10000	4.61602	4	0.866547		7370	4000	3.86747	3.60206	0.931374
	100000	5000	5	3.69897	0.739794		28500	500	4.45484	2.69897	0.605851		49160	2500	4.69161	3.39794	0.724259
	100000	5000	5	3.69897	0.739794		28500	500	4.45484	2.69897	0.605851		49160	2500	4.69161	3.39794	0.724259
	40000	5000	4.60206	3.69897	0.803764		40000	0	4.60206	0	0		63200	450	4.80072	2.65321	0.55267
	68940	5000	4.83847	3.69897	0.764491		68600	5000	4.83632	3.69897	0.764831		59050	1500	4.77122	3.17609	0.665677
	6060	120000	3.78247	5.07918	1.34282		17000	20000	4.23045	4.30103	1.01668		10400	16000	4.01703	4.20412	1.04657
	7350	5000	3.86629	3.69897	0.956724		10000	500	4	2.69897	0.674743		13060	0	4.11594	0	0
	340000	5000	5.53148	3.69897	0.668713		300000	2000	5.47712	3.30103	0.602694		29005	5000	4.46247	3.69897	0.828906
	21000	5000	4.32222	3.69897	0.855803		10000	1000	4	3	0.75		11320	4000	4.05385	3.60206	0.888554
	10000	5000	4	3.69897	0.924743		10000	1	4	0	0		6600	0	3.81954	0	0
	45000	120000	4.65321	5.07918	1.09154		30000	5000	4.47712	3.69897	0.826194		25191	20000	4.40125	4.30103	0.97723
	30000	120000	4.47712	5.07918	1.13447		30000	300	4.47712	2.47712	0.553284		28800	1000	4.45939	3	0.672737
	11700	5000	4.06819	3.69897	0.909243		8000	0	3.90309	0	0		2810	400	3.44871	2.60206	0.754503
	6000	5000	3.77815	3.69897	0.979042		10000	5000	4	3.69897	0.924743		17820	6000	4.25091	3.77815	0.888787
	20000	120000	4.30103	5.07918	1.18092		75010	5000	4.87512	3.69897	0.758745		17000	500	4.23045	2.69897	0.637987
	3000	5000	3.47712	3.69897	1.0638		8700	20000	3.93952	4.30103	1.09177		8670	500	3.93802	2.69897	0.685362
	15000	120000	4.17609	5.07918	1.21625		5000	0	3.69897	0	0		35900	100	4.55509	2	0.439069
	15000	120000	4.17609	5.07918	1.21625		5000	0	3.69897	0	0		35900	100	4.55509	2	0.439069
	5000	5000	3.69897	3.69897	1		10900	1400	4.03743	3.14613	0.779241		4850	1800	3.68574	3.25527	0.883207
	53300	5000	4.72673	3.69897	0.782565		43400	200	4.63749	2.30103	0.49618		6800	100	3.83251	2	0.521851
	30000	5000	4.47712	3.69897	0.826194		163500	1300	5.21352	3.11394	0.597283		6000	500	3.77815	2.69897	0.714363
	6800	5000	3.83251	3.69897	0.965156		65400	2000	4.81558	3.30103	0.68549		24700	6000	4.3927	3.77815	0.860098
	6800	5000	3.83251	3.69897	0.965156		65400	2000	4.81558	3.30103	0.68549		24700	6000	4.3927	3.77815	0.860098
	1080	5000	3.03342	3.69897	1.2194		1000	50	3	1.69897	0.566323		1660	600	3.22011	2.77815	0.862751
	24000	120000	4.38021	5.07918	1.15957		58400	300	4.76641	2.47712	0.519703		24250	500	4.38471	2.69897	0.615541
	20450	5000	4.31069	3.69897	0.858092		108400	800	5.03503	2.90309	0.576579		80120	3000	4.90374	3.47712	0.709075
	21000	5000	4.32222	3.69897	0.855803		41700	400	4.62014	2.60206	0.5632		9110	5000	3.95952	3.69897	0.934197
	51580	5000	4.71248	3.69897	0.78493		34400	5000	4.53656	3.69897	0.815369		36155.3	5000	4.55817	3.69897	0.811503
	47700	5000	4.67852	3.69897	0.790629		67300	50000	4.82802	4.69897	0.973272		5300	500	3.72428	2.69897	0.724697
	89000	120000	4.94939	5.07918	1.02622		49600	0	4.69548	0	0		46310	500	4.66567	2.69897	0.578474
	148260	120000	5.17102	5.07918	0.982239		60000	2500	4.77815	3.39794	0.711141		128508	5000	5.10893	3.69897	0.72402
	120824	5000	5.08215	3.69897	0.727835		80000	37000	4.90309	4.5682	0.931699		164000	6000	5.21484	3.77815	0.724499
	32400	120000	4.51055	5.07918	1.12607		61020	2000	4.78547	3.30103	0.689802		67610	500	4.83001	2.69897	0.558792
	50000	120000	4.69897	5.07918	1.08091		200000	1000	5.30103	3	0.565928		140000	5000	5.14613	3.69897	0.718787
	71500	120000	4.85431	5.07918	1.04632		82160	1500	4.91466	3.17609	0.646248		85600	2000	4.93247	3.30103	0.669244
	41100	5000	4.61384	3.69897	0.801711		45510	4500	4.65811	3.65321	0.78427		7097	1500	3.85107	3.17609	0.824729
	66950	5000	4.82575	3.69897	0.766507		50000	500	4.69897	2.69897	0.574375		35460	100	4.54974	2	0.439586
	12000	5000	4.07918	3.69897	0.906792		16650	10000	4.22141	4	0.94755		12020	15000	4.0799	4.17609	1.02358
	55000	5000	4.74036	3.69897	0.780314		120000	40000	5.07918	4.60206	0.906063		26420	54000	4.42193	4.73239	1.07021
	86500	5000	4.93702	3.69897	0.749232		80700	12000	4.90687	4.07918	0.83132		63950	0	4.80584	0	0
	10000	120000	4	5.07918	1.2698		58700	2000	4.76864	3.30103	0.692237		86000	1000	4.9345	3	0.607965
	15000	120000	4.17609	5.07918	1.21625		20400	1000	4.30963	3	0.696115		0	200	1	2.30103	2.30103
	80500	5000	4.9058	3.69897	0.754		90210	1000	4.95525	3	0.605418		31300	1000	4.49554	3	0.667327
	80500	5000	4.9058	3.69897	0.754		90210	1000	4.95525	3	0.605418		31300	1000	4.49554	3	0.667327
	180000	5000	5.25527	3.69897	0.703859		51000	2000	4.70757	3.30103	0.701217		37500	4000	4.57403	3.60206	0.787502
	180000	5000	5.25527	3.69897	0.703859		51000	2000	4.70757	3.30103	0.701217		37500	4000	4.57403	3.60206	0.787502
	30500	120000	4.4843	5.07918	1.13266		59900	300	4.77743	2.47712	0.518505		3200	6000	3.50515	3.77815	1.07789
	200000	120000	5.30103	5.07918	0.95815		24380	10000	4.38703	4	0.911778		400	500	2.60206	2.69897	1.03724
	11100	5000	4.04532	3.69897	0.914382		18300	200	4.26245	2.30103	0.539837		7150	1000	3.85431	3	0.77835
	3900	5000	3.59106	3.69897	1.03005		4300	30000	3.63347	4.47712	1.23219		1800	3000	3.25527	3.47712	1.06815
	28000	120000	4.44716	5.07918	1.14212		26395	1000	4.42152	3	0.678499		0	3000	1	3.47712	3.47712
	39600	5000	4.5977	3.69897	0.804527		20010	1000	4.30125	3	0.697472		20000	1200	4.30103	3.07918	0.715917
	25000	5000	4.39794	3.69897	0.841069		20000	2000	4.30103	3.30103	0.767498		15700	5000	4.1959	3.69897	0.881568
	8000	5000	3.90309	3.69897	0.947703		1600	10000	3.20412	4	1.24839		1200	4000	3.07918	3.60206	1.16981
	30000	120000	4.47712	5.07918	1.13447		30000	500	4.47712	2.69897	0.602836		0	0	0	0	0
	100000	5000	5	3.69897	0.739794		356990	300	5.55266	2.47712	0.446115		0	3000	1	3.47712	3.47712
	90200	120000	4.95521	5.07918	1.02502		127000	600	5.1038	2.77815	0.54433		25500	300	4.40654	2.47712	0.562147
	3000	5000	3.47712	3.69897	1.0638		9200	400	3.96379	2.60206	0.656458		5450	500	3.7364	2.69897	0.722346
	6960	5000	3.84261	3.69897	0.962619		6900	1200	3.83885	3.07918	0.802111		6220	2000	3.79379	3.30103	0.870114
	40000	5000	4.60206	3.69897	0.803764		72580	800	4.86082	2.90309	0.597243		45120	1000	4.65437	3	0.644556
	5000	5000	3.69897	3.69897	1		4500	60000	3.65321	4.77815	1.30793		5530	1000	3.74273	3	0.801555
	58200	120000	4.76492	5.07918	1.06595		17301	1800	4.23807	3.25527	0.768102		10600	800	4.02531	2.90309	0.72121
	58200	120000	4.76492	5.07918	1.06595		17301	1800	4.23807	3.25527	0.768102		10600	800	4.02531	2.90309	0.72121
	18000	5000	4.25527	3.69897	0.869267		16100	0	4.20683	0	0		24260	200	4.38489	2.30103	0.524763
	6000	5000	3.77815	3.69897	0.979042		13000	3000	4.11394	3.47712	0.845204		3520	4000	3.54654	3.60206	1.01565
	10000	120000	4	5.07918	1.2698		13000	3000	4.11394	3.47712	0.845204		5900	600	3.77085	2.77815	0.736744
	41000	120000	4.61278	5.07918	1.10111		50400	500	4.70243	2.69897	0.573952		36900	300	4.56703	2.47712	0.542393
	40600	120000	4.60853	5.07918	1.10213		27000	300	4.43136	2.47712	0.558997		60660	0	4.7829	0	0
	35380	5000	4.54876	3.69897	0.813182		28000	2000	4.44716	3.30103	0.742279		0	200	1	2.30103	2.30103
	41000	120000	4.61278	5.07918	1.10111		68305	150	4.83445	2.17609	0.450122		76100	0	4.88138	0	0
	71700	120000	4.85552	5.07918	1.04606		42210	0	4.62542	0	0		30410	200	4.48302	2.30103	0.513277
	10000	5000	4	3.69897	0.924743		15000	8000	4.17609	3.90309	0.934628		25660	200	4.40926	2.30103	0.521863
	10000	5000	4	3.69897	0.924743		15000	8000	4.17609	3.90309	0.934628		25660	200	4.40926	2.30103	0.521863
	60000	5000	4.77815	3.69897	0.774143		80000	22000	4.90309	4.34242	0.88565		72700	400	4.86153	2.60206	0.535234
	60000	5000	4.77815	3.69897	0.774143		80000	22000	4.90309	4.34242	0.88565		72700	400	4.86153	2.60206	0.535234
	15000	120000	4.17609	5.07918	1.21625		20000	500	4.30103	2.69897	0.627517		20000	400	4.30103	2.60206	0.604985
	40000	120000	4.60206	5.07918	1.10368		10200	2000	4.0086	3.30103	0.823487		25660	2000	4.40926	3.30103	0.748659
	81000	5000	4.90849	3.69897	0.753587		64440	30000	4.80916	4.47712	0.930958		4460	700	3.64933	2.8451	0.779621
	200000	5000	5.30103	3.69897	0.697783		120000	1000	5.07918	3	0.590646		111600	2000	5.04766	3.30103	0.653972
	52000	5000	4.716	3.69897	0.784344		60000	2000	4.77815	3.30103	0.690859		40200	5000	4.60423	3.69897	0.803386
	48000	120000	4.68124	5.07918	1.08501		73700	20000	4.86747	4.30103	0.883628		44920	3000	4.65244	3.47712	0.747376
	26000	5000	4.41497	3.69897	0.837824		51430	1300	4.71122	3.11394	0.660964		25000	6000	4.39794	3.77815	0.859073
	90000	5000	4.95424	3.69897	0.746627		80000	2000	4.90309	3.30103	0.673255		0	4000	1	3.60206	3.60206
	85126	5000	4.93006	3.69897	0.750289		82120	0	4.91445	0	0		45980	600	4.66257	2.77815	0.595841
	2340	5000	3.36922	3.69897	1.09787		0	1000	1	3	3		820	3000	2.91381	3.47712	1.19332
	37472	120000	4.57371	5.07918	1.11052		25400	3000	4.40483	3.47712	0.789388		25170	5500	4.40088	3.74036	0.849912
	70000	120000	4.8451	5.07918	1.04831		50000	400	4.69897	2.60206	0.553751		30800	300	4.48855	2.47712	0.551876
	48150	5000	4.6826	3.69897	0.78994		52300	20000	4.7185	4.30103	0.911525		48900	500	4.68931	2.69897	0.575558
	31000	120000	4.49136	5.07918	1.13088		25000	500	4.39794	2.69897	0.61369		47800	500	4.67943	2.69897	0.576773
	900	5000	2.95424	3.69897	1.25209		41150	2000	4.61437	3.30103	0.71538		18200	120000	4.26007	5.07918	1.19228
	30900	5000	4.48996	3.69897	0.823832		20000	0	4.30103	0	0		1150	3000	3.0607	3.47712	1.13606
	65000	120000	4.81291	5.07918	1.05532		30000	100	4.47712	2	0.446716		10800	0	4.03342	0	0
	65000	120000	4.81291	5.07918	1.05532		30000	100	4.47712	2	0.446716		10800	0	4.03342	0	0
	20000	120000	4.30103	5.07918	1.18092		10000	600	4	2.77815	0.694538		17910	600	4.2531	2.77815	0.653207
	61000	120000	4.78533	5.07918	1.06141		21010	10000	4.32243	4	0.925406		25400	1000	4.40483	3	0.68107
	30000	5000	4.47712	3.69897	0.826194		60000	2000	4.77815	3.30103	0.690859		51290	4000	4.71003	3.60206	0.764763
	131000	120000	5.11727	5.07918	0.992557		158300	500	5.19948	2.69897	0.519085		131230	1000	5.11803	3	0.586163
	20000	5000	4.30103	3.69897	0.86002		100000	7000	5	3.8451	0.76902		85740	3000	4.93318	3.47712	0.704843
	11500	120000	4.0607	5.07918	1.25081		30300	200	4.48144	2.30103	0.513457		30400	30	4.48287	1.47712	0.329503
	11850	5000	4.07372	3.69897	0.908008		10100	200	4.00432	2.30103	0.574637		19700	200	4.29447	2.30103	0.535813
	10000	5000	4	3.69897	0.924743		10000	300	4	2.47712	0.61928		4500	20	3.65321	1.30103	0.356133
	78200	120000	4.89321	5.07918	1.03801		40000	200	4.60206	2.30103	0.5		49400	300	4.69373	2.47712	0.527751
	100000	5000	5	3.69897	0.739794		60000	400	4.77815	2.60206	0.544575		59000	500	4.77085	2.69897	0.565721
	28000	120000	4.44716	5.07918	1.14212		50000	600	4.69897	2.77815	0.591226		47450	1000	4.67624	3	0.641542
	34050	5000	4.53212	3.69897	0.816168		46180	600	4.66445	2.77815	0.595601		49170	500	4.6917	2.69897	0.575265
	40000	5000	4.60206	3.69897	0.803764		57250	300	4.75778	2.47712	0.520647		39706	300	4.59886	2.47712	0.538639
	20000	120000	4.30103	5.07918	1.18092		30000	300	4.47712	2.47712	0.553284		70	800	1.8451	2.90309	1.57341
	4000	120000	3.60206	5.07918	1.41008		3000	2000	3.47712	3.30103	0.949357		4800	2000	3.68124	3.30103	0.896717
	200000	5000	5.30103	3.69897	0.697783		106100	2000	5.02572	3.30103	0.656828		75090	4000	4.87558	3.60206	0.738796
	31000	5000	4.49136	3.69897	0.823574		16010	5000	4.20439	3.69897	0.879787		46000	7000	4.66276	3.8451	0.82464
	50000	5000	4.69897	3.69897	0.787187		44580	500	4.64914	2.69897	0.580531		57215.3	1500	4.75751	3.17609	0.667595
	42650	120000	4.62992	5.07918	1.09703		40000	0	4.60206	0	0		33700	800	4.52763	2.90309	0.641194
	12000	5000	4.07918	3.69897	0.906792		120350	1000	5.08045	3	0.590499		76078	2500	4.88126	3.39794	0.69612
	12000	5000	4.07918	3.69897	0.906792		120350	1000	5.08045	3	0.590499		76078	2500	4.88126	3.39794	0.69612
	12000	5000	4.07918	3.69897	0.906792		120350	1000	5.08045	3	0.590499		76078	2500	4.88126	3.39794	0.69612
	87900	120000	4.94399	5.07918	1.02734		71500	600	4.85431	2.77815	0.572307		95720	500	4.981	2.69897	0.541853
	23360	5000	4.36847	3.69897	0.846742		30000	2000	4.47712	3.30103	0.737311		17500	3000	4.24304	3.47712	0.819489
	50000	120000	4.69897	5.07918	1.08091		20000	1000	4.30103	3	0.697507		66001	500	4.81955	2.69897	0.560005
	34000	120000	4.53148	5.07918	1.12087		69400	500	4.84136	2.69897	0.557482		90620	1500	4.95722	3.17609	0.6407
	10000	5000	4	3.69897	0.924743		17420	300	4.24105	2.47712	0.584082		18960	3000	4.27784	3.47712	0.812822
	53400	120000	4.72754	5.07918	1.07438		28000	4000	4.44716	3.60206	0.809969		44620	2000	4.64953	3.30103	0.709971
	53400	120000	4.72754	5.07918	1.07438		28000	4000	4.44716	3.60206	0.809969		44620	2000	4.64953	3.30103	0.709971
	3000	120000	3.47712	5.07918	1.46074		1360	1000	3.13354	3	0.957384		7060	3000	3.8488	3.47712	0.903429
	2000	5000	3.30103	3.69897	1.12055		1800	1500	3.25527	3.17609	0.975676		860	420	2.9345	2.62325	0.893934
	4000	5000	3.60206	3.69897	1.0269		3000	0	3.47712	0	0		1320	600	3.12057	2.77815	0.890269
	6000	5000	3.77815	3.69897	0.979042		8110	1500	3.90902	3.17609	0.812503		2720	2500	3.43457	3.39794	0.989335
	10000	120000	4	5.07918	1.2698		30000	13000	4.47712	4.11394	0.918881		0	800	1	2.90309	2.90309
	20000	5000	4.30103	3.69897	0.86002		10000	400	4	2.60206	0.650515		14500	4000	4.16137	3.60206	0.865595
	28000	5000	4.44716	3.69897	0.83176		20400	1000	4.30963	3	0.696115		13000	3000	4.11394	3.47712	0.845204
	30000	120000	4.47712	5.07918	1.13447		30000	200	4.47712	2.30103	0.513953		76100	200	4.88138	2.30103	0.471389
	111340	5000	5.04665	3.69897	0.732955		50000	600	4.69897	2.77815	0.591226		35880	1200	4.55485	3.07918	0.676022
	30000	5000	4.47712	3.69897	0.826194		108000	300	5.03342	2.47712	0.492134		20000	500	4.30103	2.69897	0.627517
	30000	5000	4.47712	3.69897	0.826194		108000	300	5.03342	2.47712	0.492134		20000	500	4.30103	2.69897	0.627517
	8000	5000	3.90309	3.69897	0.947703		5000	200	3.69897	2.30103	0.622073		1750	300	3.24304	2.47712	0.763827
	16000	5000	4.20412	3.69897	0.879844		8660	1000	3.93752	3	0.761901		44300	2500	4.6464	3.39794	0.731305
	59700	5000	4.77597	3.69897	0.774495		61400	8000	4.78817	3.90309	0.815153		56300	5000	4.75051	3.69897	0.778647
	57480	120000	4.75952	5.07918	1.06716		130820	10000	5.11667	4	0.781758		64580	7500	4.8101	3.87506	0.80561
	30000	5000	4.47712	3.69897	0.826194		117400	2000	5.06967	3.30103	0.651133		35100	3000	4.54531	3.47712	0.764991
	80000	5000	4.90309	3.69897	0.754416		96550	10000	4.98475	4	0.802447		26300	5000	4.41996	3.69897	0.836879
	5840	120000	3.76641	5.07918	1.34855		13560	700	4.13226	2.8451	0.688509		2500	2000	3.39794	3.30103	0.97148
	19200	5000	4.2833	3.69897	0.863579		50100	6000	4.69984	3.77815	0.80389		37700	4000	4.57634	3.60206	0.787105
	15500	120000	4.19033	5.07918	1.21212		11200	0	4.04922	0	0		6200	500	3.79239	2.69897	0.71168
	18300	120000	4.26245	5.07918	1.19161		22800	3200	4.35793	3.50515	0.804314		0	4300	1	3.63347	3.63347
	42760	120000	4.63104	5.07918	1.09677		34260	2000	4.53479	3.30103	0.727935		55300	5000	4.74273	3.69897	0.779925
	21640	5000	4.33526	3.69897	0.85323		14130	4200	4.15014	3.62325	0.873042		6900	25	3.83885	1.39794	0.364156
	21640	5000	4.33526	3.69897	0.85323		14130	4200	4.15014	3.62325	0.873042		6900	25	3.83885	1.39794	0.364156
	8500	120000	3.92942	5.07918	1.2926		41070	10000	4.61352	4	0.867016		6080	6120	3.7839	3.78675	1.00075
	100300	120000	5.0013	5.07918	1.01557		54760	23000	4.73846	4.36173	0.920494		0	3000	1	3.47712	3.47712
	33600	5000	4.52634	3.69897	0.81721		132720	13000	5.12294	4.11394	0.803044		25800	10000	4.41162	4	0.906696
	21000	5000	4.32222	3.69897	0.855803		60000	3000	4.77815	3.47712	0.727713		122100	1000	5.08672	3	0.589772
	21000	5000	4.32222	3.69897	0.855803		60000	3000	4.77815	3.47712	0.727713		122100	1000	5.08672	3	0.589772
	21000	5000	4.32222	3.69897	0.855803		60000	3000	4.77815	3.47712	0.727713		122100	1000	5.08672	3	0.589772
	9800	120000	3.99123	5.07918	1.27259		58300	10000	4.76567	4	0.839337		41350	2000	4.61648	3.30103	0.715054
	20000	120000	4.30103	5.07918	1.18092		40120	2000	4.60336	3.30103	0.717091		12400	3000	4.09342	3.47712	0.849441
	250920	5000	5.39954	3.69897	0.685053		210970	12000	5.32422	4.07918	0.766156		50000	10000	4.69897	4	0.85125
	10000	5000	4	3.69897	0.924743		8000	2700	3.90309	3.43136	0.87914		8600	2500	3.9345	3.39794	0.863627
	5000	120000	3.69897	5.07918	1.37313		5000	7000	3.69897	3.8451	1.03951		7550	1000	3.87795	3	0.773605
	20000	120000	4.30103	5.07918	1.18092		49220	2000	4.69214	3.30103	0.703523		83000	1000	4.91908	3	0.60987
	30000	5000	4.47712	3.69897	0.826194		40000	600	4.60206	2.77815	0.603676		22200	0	4.34635	0	0
	8660	5000	3.93752	3.69897	0.939417		3000	1200	3.47712	3.07918	0.885555		10300	0	4.01284	0	0
	12090	5000	4.08243	3.69897	0.906071		15000	50	4.17609	1.69897	0.406833		10300	0	4.01284	0	0
	22000	120000	4.34242	5.07918	1.16967		26000	4000	4.41497	3.60206	0.815874		17400	500	4.24055	2.69897	0.636467
	30000	120000	4.47712	5.07918	1.13447		20800	400	4.31806	2.60206	0.602599		60200	500	4.7796	2.69897	0.564686
	44800	120000	4.65128	5.07918	1.092		40000	200	4.60206	2.30103	0.5		75050	0	4.87535	0	0
	5000	120000	3.69897	5.07918	1.37313		4400	500	3.64345	2.69897	0.740773		6000	6000	3.77815	3.77815	1
	2500	120000	3.39794	5.07918	1.49478		5500	3000	3.74036	3.47712	0.929621		15900	6500	4.2014	3.81291	0.907535
	3600	5000	3.5563	3.69897	1.04012		2640	600	3.4216	2.77815	0.811944		2990	400	3.47567	2.60206	0.74865
	1800	5000	3.25527	3.69897	1.1363		2800	600	3.44716	2.77815	0.805925		2200	0	3.34242	0	0
	8000	120000	3.90309	5.07918	1.30132		33450	1000	4.5244	3	0.663072		89750	1000	4.95303	3	0.605689
	30000	5000	4.47712	3.69897	0.826194		40000	3000	4.60206	3.47712	0.755558		34100	2000	4.53275	3.30103	0.728261
	20100	5000	4.3032	3.69897	0.859587		20000	2000	4.30103	3.30103	0.767498		66000	1000	4.81954	3	0.622466
	14060	5000	4.14799	3.69897	0.891751		13210	200	4.1209	2.30103	0.55838		29710	100	4.4729	2	0.447137
	97950	5000	4.991	3.69897	0.741127		60000	1500	4.77815	3.17609	0.664711		102180	1500	5.00937	3.17609	0.634031
	30500	120000	4.4843	5.07918	1.13266		27000	5000	4.43136	3.69897	0.834725		30070	3000	4.47813	3.47712	0.776467
	21400	120000	4.33041	5.07918	1.17291		60000	30000	4.77815	4.47712	0.936999		47700	12000	4.67852	4.07918	0.871896
	61680	5000	4.79014	3.69897	0.772204		11865	5000	4.07427	3.69897	0.907886		1815	2000	3.25888	3.30103	1.01293
	20000	5000	4.30103	3.69897	0.86002		31550	22000	4.499	4.34242	0.965197		58800	10000	4.76938	4	0.838684
	56980	120000	4.75572	5.07918	1.06801		85500	3000	4.93197	3.47712	0.705017		114210	2000	5.0577	3.30103	0.652674
	191800	120000	5.28285	5.07918	0.961447		118070	2000	5.07214	3.30103	0.650816		415060	20000	5.61811	4.30103	0.765565
	39600	5000	4.5977	3.69897	0.804527		109850	6000	5.0408	3.77815	0.749514		35000	2000	4.54407	3.30103	0.726448
	40735	5000	4.60997	3.69897	0.802385		30000	600	4.47712	2.77815	0.620522		4864	2000	3.68699	3.30103	0.895318
	50000	5000	4.69897	3.69897	0.787187		35200	300	4.54654	2.47712	0.544836		35800	200	4.55388	2.30103	0.50529
	30000	5000	4.47712	3.69897	0.826194		30000	300	4.47712	2.47712	0.553284		0	400	1	2.60206	2.60206
	10000	5000	4	3.69897	0.924743		17500	600	4.24304	2.77815	0.654755		0	460	1	2.66276	2.66276
	32000	5000	4.50515	3.69897	0.821054		3000	200	3.47712	2.30103	0.661763		0	200	1	2.30103	2.30103
	29900	5000	4.47567	3.69897	0.826462		26816	1000	4.42839	3	0.677446		19550	2000	4.29115	3.30103	0.769265
	5160	5000	3.71265	3.69897	0.996315		7000	1000	3.8451	3	0.780214		9420	1500	3.97405	3.17609	0.799207
	42800	5000	4.63144	3.69897	0.798665		40000	3000	4.60206	3.47712	0.755558		70750	200	4.84973	2.30103	0.474466
	100000	5000	5	3.69897	0.739794		140000	2000	5.14613	3.30103	0.641459		0	1000	1	3	3
	50000	5000	4.69897	3.69897	0.787187		51900	2000	4.71517	3.30103	0.700088		20100	10000	4.3032	4	0.929542
	34660	120000	4.53983	5.07918	1.1188		100000	8000	5	3.90309	0.780618		37200	7000	4.57054	3.8451	0.841278
	15000	120000	4.17609	5.07918	1.21625		10000	2000	4	3.30103	0.825257		33500	5000	4.52504	3.69897	0.817444
	15000	120000	4.17609	5.07918	1.21625		10000	2000	4	3.30103	0.825257		33500	5000	4.52504	3.69897	0.817444
	70000	120000	4.8451	5.07918	1.04831		110000	5000	5.04139	3.69897	0.73372		64300	500	4.80821	2.69897	0.561325
	83720	120000	4.92283	5.07918	1.03176		60000	600	4.77815	2.77815	0.581428		45800	1500	4.66087	3.17609	0.681438
	128300	5000	5.10823	3.69897	0.72412		126820	0	5.10319	0	0		94100	0	4.97359	0	0
	128300	5000	5.10823	3.69897	0.72412		126820	0	5.10319	0	0		94100	0	4.97359	0	0
	6000	5000	3.77815	3.69897	0.979042		6902	10000	3.83897	4	1.04194		2420	1300	3.38382	3.11394	0.920246
	71290	120000	4.85303	5.07918	1.0466		39200	21000	4.59329	4.32222	0.940986		23620	6000	4.37328	3.77815	0.863917
	7250	5000	3.86034	3.69897	0.958198		39500	4000	4.5966	3.60206	0.783636		17270	3700	4.23729	3.5682	0.842095
	1090	120000	3.03743	5.07918	1.6722		21100	1000	4.32428	3	0.693757		21740	10000	4.33726	4	0.922241
	24770	5000	4.39393	3.69897	0.841837		7360	600	3.86688	2.77815	0.718448		21380	500	4.33001	2.69897	0.623318
	20000	5000	4.30103	3.69897	0.86002		35000	0	4.54407	0	0		55800	0	4.74663	0	0
	20000	5000	4.30103	3.69897	0.86002		35000	0	4.54407	0	0		55800	0	4.74663	0	0
	64650	120000	4.81057	5.07918	1.05584		60452	500	4.78141	2.69897	0.564471		75990	25000	4.88076	4.39794	0.901078
	15000	5000	4.17609	3.69897	0.885749		20000	300	4.30103	2.47712	0.575937		17200	0	4.23553	0	0
	7000	5000	3.8451	3.69897	0.961996		7300	350	3.86332	2.54407	0.658518		7240	4000	3.85974	3.60206	0.933239
	17300	120000	4.23805	5.07918	1.19847		33585	400	4.52615	2.60206	0.574895		8700	1000	3.93952	3	0.761514
	15000	120000	4.17609	5.07918	1.21625		57000	500	4.75587	2.69897	0.567502		5060	1000	3.70415	3	0.809902
	5640	5000	3.75128	3.69897	0.986056		8060	1000	3.90634	3	0.767983		7600	300	3.88081	2.47712	0.638299
	7500	5000	3.87506	3.69897	0.954558		3600	500	3.5563	2.69897	0.758926		4100	0	3.61278	0	0
	3680	5000	3.56585	3.69897	1.03733		3100	1600	3.49136	3.20412	0.917728		2020	1600	3.30535	3.20412	0.969373
	20000	5000	4.30103	3.69897	0.86002		31000	600	4.49136	2.77815	0.618554		41570	500	4.61878	2.69897	0.584347
	20000	120000	4.30103	5.07918	1.18092		55000	0	4.74036	0	0		12420	0	4.09412	0	0
	9550	5000	3.98	3.69897	0.929389		31330	140	4.49596	2.14613	0.477346		8636	20	3.93631	1.30103	0.33052
	25000	5000	4.39794	3.69897	0.841069		48020	7000	4.68142	3.8451	0.821353		15950	12000	4.20276	4.07918	0.970596
	15000	5000	4.17609	3.69897	0.885749		8500	900	3.92942	2.95424	0.751827		2400	1000	3.38021	3	0.887518
	7000	5000	3.8451	3.69897	0.961996		10670	3000	4.02816	3.47712	0.863202		4260	500	3.62941	2.69897	0.743639
	5000	5000	3.69897	3.69897	1		11000	1000	4.04139	3	0.742318		23820	1000	4.37694	3	0.68541
	3200	5000	3.50515	3.69897	1.0553		8000	4000	3.90309	3.60206	0.922874		4710	1500	3.67302	3.17609	0.864708
	6000	5000	3.77815	3.69897	0.979042		20000	1000	4.30103	3	0.697507		21300	2000	4.32838	3.30103	0.762648
	10000	120000	4	5.07918	1.2698		25000	650	4.39794	2.81291	0.639598		15100	1000	4.17898	3	0.717879
	3600	5000	3.5563	3.69897	1.04012		3500	800	3.54407	2.90309	0.819141		3100	100	3.49136	2	0.572842
	10000	120000	4	5.07918	1.2698		22000	1000	4.34242	3	0.690859		17600	0	4.24551	0	0
	1640	5000	3.21484	3.69897	1.15059		3760	300	3.57519	2.47712	0.692865		2790	300	3.4456	2.47712	0.718922
	10000	5000	4	3.69897	0.924743		2880	400	3.45939	2.60206	0.752173		2300	7000	3.36173	3.8451	1.14379
	25000	5000	4.39794	3.69897	0.841069		35700	800	4.55267	2.90309	0.637668		43600	400	4.63949	2.60206	0.560851
	25000	5000	4.39794	3.69897	0.841069		35700	800	4.55267	2.90309	0.637668		43600	400	4.63949	2.60206	0.560851
	60360	120000	4.78075	5.07918	1.06242		105750	200	5.02428	2.30103	0.457982		28100	300	4.44871	2.47712	0.556818
	10400	5000	4.01703	3.69897	0.920821		6000	1500	3.77815	3.17609	0.840647		6900	3000	3.83885	3.47712	0.905772
	5550	5000	3.74429	3.69897	0.987895		10000	3000	4	3.47712	0.86928		4450	30	3.64836	1.47712	0.404873
	58820	120000	4.76953	5.07918	1.06492		30000	3000	4.47712	3.47712	0.776642		19840	13000	4.29754	4.11394	0.957278
	20000	5000	4.30103	3.69897	0.86002		20000	700	4.30103	2.8451	0.661492		0	300	1	2.47712	2.47712
	6000	5000	3.77815	3.69897	0.979042		25000	2000	4.39794	3.30103	0.750585		45340	8200	4.65648	3.91381	0.840509
	7620	120000	3.88195	5.07918	1.30841		30000	2000	4.47712	3.30103	0.737311		19540	500	4.29092	2.69897	0.628995
	10000	5000	4	3.69897	0.924743		7000	7000	3.8451	3.8451	1		1300	3000	3.11394	3.47712	1.11663
	25000	120000	4.39794	5.07918	1.1549		30000	1000	4.47712	3	0.670073		30570	1000	4.4853	3	0.668852
	25000	120000	4.39794	5.07918	1.1549		30000	1000	4.47712	3	0.670073		30570	1000	4.4853	3	0.668852
	51600	120000	4.71265	5.07918	1.07778		58760	500	4.76908	2.69897	0.565931		7050	700	3.84819	2.8451	0.739334
	1000	120000	3	5.07918	1.69306		6680	800	3.82478	2.90309	0.759022		400	0	2.60206	0	0
	6100	5000	3.78533	3.69897	0.977186		6144	1200	3.78845	3.07918	0.812781		5760	600	3.76042	2.77815	0.738787
	7260	5000	3.86094	3.69897	0.95805		5000	500	3.69897	2.69897	0.729654		10650	6000	4.02735	3.77815	0.938123
	14400	120000	4.15836	5.07918	1.22144		120000	0	5.07918	0	0		80000	500	4.90309	2.69897	0.550463
	9000	5000	3.95424	3.69897	0.935443		43370	280	4.63719	2.44716	0.527724		15500	300	4.19033	2.47712	0.591152
	45810	5000	4.66096	3.69897	0.793607		80000	200	4.90309	2.30103	0.469302		53170	600	4.72567	2.77815	0.587886
	8000	120000	3.90309	5.07918	1.30132		30000	300	4.47712	2.47712	0.553284		450	150	2.65321	2.17609	0.820172
	20000	5000	4.30103	3.69897	0.86002		50000	200	4.69897	2.30103	0.489688		61800	10	4.79099	1	0.208725
	20000	5000	4.30103	3.69897	0.86002		50000	200	4.69897	2.30103	0.489688		61800	10	4.79099	1	0.208725
	24200	5000	4.38382	3.69897	0.843779		17000	12000	4.23045	4.07918	0.964243		300	700	2.47712	2.8451	1.14855
	30000	5000	4.47712	3.69897	0.826194		63250	0	4.80106	0	0		108600	500	5.03583	2.69897	0.535953
	20000	5000	4.30103	3.69897	0.86002		49910	1000	4.69819	3	0.638544		23410	2400	4.3694	3.38021	0.77361
	49576	5000	4.69527	3.69897	0.787807		23900	1500	4.3784	3.17609	0.7254		120450	1000	5.08081	3	0.590457
	13900	5000	4.14301	3.69897	0.892821		7000	5000	3.8451	3.69897	0.961996		14100	0	4.14922	0	0
	21870	5000	4.33985	3.69897	0.852327		6000	700	3.77815	2.8451	0.75304		32337	700	4.5097	2.8451	0.630884
	30000	120000	4.47712	5.07918	1.13447		4000	3000	3.60206	3.47712	0.965315		6174	100	3.79057	2	0.527626
	10000	5000	4	3.69897	0.924743		7000	2000	3.8451	3.30103	0.858503		45950	4000	4.66229	3.60206	0.772595
	40000	120000	4.60206	5.07918	1.10368		4000	5000	3.60206	3.69897	1.0269		33272	2000	4.52208	3.30103	0.729981
	30000	5000	4.47712	3.69897	0.826194		29800	4000	4.47422	3.60206	0.805071		3020	8400	3.48001	3.92428	1.12766
	5000	5000	3.69897	3.69897	1		5500	600	3.74036	2.77815	0.742749		37480	800	4.5738	2.90309	0.634722
	3120	5000	3.49415	3.69897	1.05862		3000	2500	3.47712	3.39794	0.977228		0	420	1	2.62325	2.62325
	5000	5000	3.69897	3.69897	1		5000	500	3.69897	2.69897	0.729654		0	20	1	1.30103	1.30103
	3000	5000	3.47712	3.69897	1.0638		0	0	0	0	0		0	0	0	0	0
	27750	5000	4.44326	3.69897	0.83249		20000	500	4.30103	2.69897	0.627517		50610	200	4.70424	2.30103	0.48914
	8950	5000	3.95182	3.69897	0.936016		30000	20000	4.47712	4.30103	0.960669		2450	6200	3.38917	3.79239	1.11897
	13000	5000	4.11394	3.69897	0.89913		12450	3000	4.09517	3.47712	0.849079		4690	3000	3.67117	3.47712	0.947142
	13000	5000	4.11394	3.69897	0.89913		12450	3000	4.09517	3.47712	0.849079		4690	3000	3.67117	3.47712	0.947142
	6000	5000	3.77815	3.69897	0.979042		23000	1000	4.36173	3	0.687801		4250	360	3.62839	2.5563	0.704528
	68200	5000	4.83378	3.69897	0.765233		57800	2000	4.76193	3.30103	0.693213		14606	1500	4.16453	3.17609	0.762653
	81830	120000	4.91291	5.07918	1.03384		70000	2000	4.8451	3.30103	0.681313		0	3000	1	3.47712	3.47712
	40000	5000	4.60206	3.69897	0.803764		73400	200	4.8657	2.30103	0.472909		0	200	1	2.30103	2.30103
	18300	120000	4.26245	5.07918	1.19161		42660	20000	4.63002	4.30103	0.928944		20000	5000	4.30103	3.69897	0.86002
	81200	120000	4.90956	5.07918	1.03455		88950	5000	4.94915	3.69897	0.747396		60550	500	4.78211	2.69897	0.564388
	200000	120000	5.30103	5.07918	0.95815		100000	2000	5	3.30103	0.660206		50700	10000	4.70501	4	0.850158
	52080	120000	4.71667	5.07918	1.07686		41590	500	4.61899	2.69897	0.584321		22170	500	4.34577	2.69897	0.621057
	54500	120000	4.7364	5.07918	1.07237		75750	28000	4.87938	4.44716	0.911418		77800	400	4.89098	2.60206	0.532012
	75000	5000	4.87506	3.69897	0.758754		68000	2000	4.83251	3.30103	0.683088		66760	1000	4.82452	3	0.621824
	113000	5000	5.05308	3.69897	0.732023		61200	1000	4.78675	3	0.62673		55140	5000	4.74147	3.69897	0.780132
	72824	120000	4.86227	5.07918	1.04461		48000	3000	4.68124	3.47712	0.742778		82580	8000	4.91687	3.90309	0.793815
	92500	5000	4.96614	3.69897	0.744838		80500	5000	4.9058	3.69897	0.754		104820	5000	5.02044	3.69897	0.736781
	20400	120000	4.30963	5.07918	1.17857		14627	500	4.16516	2.69897	0.647988		22140	100	4.34518	2	0.46028
	72400	120000	4.85974	5.07918	1.04516		90700	1000	4.95761	3	0.605131		67860	1000	4.83161	3	0.620911
	112500	120000	5.05115	5.07918	1.00555		113600	15300	5.05538	4.18469	0.82777		54100	10000	4.7332	4	0.845095
	109870	120000	5.04088	5.07918	1.0076		40000	5000	4.60206	3.69897	0.803764		32400	5000	4.51055	3.69897	0.820072
	50000	5000	4.69897	3.69897	0.787187		50500	1000	4.70329	3	0.637851		25800	50000	4.41162	4.69897	1.06513
	62500	5000	4.79588	3.69897	0.771281		30000	10000	4.47712	4	0.893431		97000	500	4.98677	2.69897	0.541226
	34400	120000	4.53656	5.07918	1.11961		27140	500	4.43361	2.69897	0.608752		0	2000	1	3.30103	3.30103
	60000	5000	4.77815	3.69897	0.774143		20000	1200	4.30103	3.07918	0.715917		34500	2000	4.53782	3.30103	0.727449
	34400	120000	4.53656	5.07918	1.11961		27140	500	4.43361	2.69897	0.608752		0	2000	1	3.30103	3.30103
	90700	120000	4.95761	5.07918	1.02452		45000	2000	4.65321	3.30103	0.709409		69920	1500	4.8446	3.17609	0.655594
	85100	5000	4.92993	3.69897	0.750309		54610	1500	4.73727	3.17609	0.670447		58560	1000	4.7676	3	0.629247
	85500	120000	4.93197	5.07918	1.02985		125275	1000	5.09786	3	0.588482		0	5000	1	3.69897	3.69897
	85500	120000	4.93197	5.07918	1.02985		125275	1000	5.09786	3	0.588482		0	5000	1	3.69897	3.69897
	100000	5000	5	3.69897	0.739794		101210	2000	5.00522	3.30103	0.659517		63600	0	4.80346	0	0
	11600	5000	4.06446	3.69897	0.910077		11000	1000	4.04139	3	0.742318		7456	1000	3.87251	3	0.774692
	73000	5000	4.86332	3.69897	0.760585		50000	1000	4.69897	3	0.638438		96000	4859.94	4.98227	3.68663	0.73995
	12000	120000	4.07918	5.07918	1.24515		13300	5000	4.12385	3.69897	0.89697		0	2500	1	3.39794	3.39794
	40000	5000	4.60206	3.69897	0.803764		74730	200	4.87349	2.30103	0.472152		33970	0	4.5311	0	0
	62500	5000	4.79588	3.69897	0.771281		50000	3000	4.69897	3.47712	0.739975		74110	10000	4.86988	4	0.821376
	86300	5000	4.93601	3.69897	0.749385		60000	1000	4.77815	3	0.627858		0	3500	1	3.54407	3.54407
	60556	120000	4.78216	5.07918	1.06211		38470	4000	4.58512	3.60206	0.785597		51700	2000	4.71349	3.30103	0.700337
	20000	120000	4.30103	5.07918	1.18092		70000	600	4.8451	2.77815	0.573394		31970	2500	4.50474	3.39794	0.754303
	2000	5000	3.30103	3.69897	1.12055		500	50	2.69897	1.69897	0.629488		4260	1000	3.62941	3	0.826581
	51520	5000	4.71198	3.69897	0.785015		60570	4000	4.78226	3.60206	0.753213		20700	20000	4.31597	4.30103	0.996538
	13530	5000	4.1313	3.69897	0.895353		4718	80000	3.67376	4.90309	1.33463		0	400	1	2.60206	2.60206
	91110	5000	4.95957	3.69897	0.745825		62000	1000	4.79239	3	0.625992		81170	3000	4.9094	3.47712	0.708259
	60680	120000	4.78305	5.07918	1.06191		75500	0	4.87795	0	0		4010	1000	3.60314	3	0.832606
	70640	5000	4.84905	3.69897	0.762824		20000	800	4.30103	2.90309	0.674976		3250	1500	3.51188	3.17609	0.904384
	93000	5000	4.96848	3.69897	0.744487		82150	500	4.91461	2.69897	0.549173		52720	1500	4.72198	3.17609	0.672619
	61800	5000	4.79099	3.69897	0.772068		60000	4000	4.77815	3.60206	0.753861		32850	2500	4.51654	3.39794	0.752333
	78000	5000	4.89209	3.69897	0.756112		60000	3700	4.77815	3.5682	0.746775		72400	1800	4.85974	3.25527	0.669845
	89100	5000	4.94988	3.69897	0.747285		87000	3500	4.93952	3.54407	0.717493		77830	3000	4.89115	3.47712	0.710901
	90000	120000	4.95424	5.07918	1.02522		47380	5000	4.6756	3.69897	0.791123		71310	6000	4.85315	3.77815	0.778495
	37080	5000	4.56914	3.69897	0.809555		82550	300	4.91672	2.47712	0.503816		39855.3	3000	4.60049	3.47712	0.755816
	50000	120000	4.69897	5.07918	1.08091		30000	7000	4.47712	3.8451	0.858833		7300	5000	3.86332	3.69897	0.957458
	120000	120000	5.07918	5.07918	1		30000	3000	4.47712	3.47712	0.776642		67445	10000	4.82895	4	0.828337
	4760	5000	3.67761	3.69897	1.00581		3160	40	3.49969	1.60206	0.457772		2730	100	3.43616	2	0.582045
	13900	5000	4.14301	3.69897	0.892821		3870	7500	3.58771	3.87506	1.08009		11020	1100	4.04218	3.04139	0.752414
	40700	120000	4.60959	5.07918	1.10187		100000	0	5	0	0		30000	500	4.47712	2.69897	0.602836
	172000	5000	5.23553	3.69897	0.706513		150000	500	5.17609	2.69897	0.52143		0	3000	1	3.47712	3.47712
	12000	5000	4.07918	3.69897	0.906792		25370	200	4.40432	2.30103	0.522448		10900	100	4.03743	2	0.495365
	72200	120000	4.85854	5.07918	1.04541		80000	0	4.90309	0	0		33920	300	4.53046	2.47712	0.546771
	70000	5000	4.8451	3.69897	0.763446		75380	0	4.87726	0	0		0	1000	1	3	3
	33500	120000	4.52504	5.07918	1.12246		27000	300	4.43136	2.47712	0.558997		70100	0	4.84572	0	0
	33500	120000	4.52504	5.07918	1.12246		27000	300	4.43136	2.47712	0.558997		70100	0	4.84572	0	0
	20000	5000	4.30103	3.69897	0.86002		16800	4000	4.22531	3.60206	0.852496		6000	800	3.77815	2.90309	0.768389
	102750	5000	5.01178	3.69897	0.738055		30000	30000	4.47712	4.47712	1		1400	1000	3.14613	3	0.953553
	55000	5000	4.74036	3.69897	0.780314		36050	1000	4.55691	3	0.658342		8900	0	3.94939	0	0
	80825	5000	4.90755	3.69897	0.753731		30000	13000	4.47712	4.11394	0.918881		52230	73000	4.71792	4.86332	1.03082
	160300	120000	5.20493	5.07918	0.97584		78600	1500	4.89542	3.17609	0.648788		10600	0	4.02531	0	0
	20000	120000	4.30103	5.07918	1.18092		40220	1200	4.60444	3.07918	0.668741		34920	2000	4.54307	3.30103	0.726607
	7720	5000	3.88762	3.69897	0.951475		41300	1000	4.61595	3	0.64992		7820	500	3.89321	2.69897	0.693251
	30000	5000	4.47712	3.69897	0.826194		34000	20000	4.53148	4.30103	0.949145		50000	300	4.69897	2.47712	0.527163
	60000	120000	4.77815	5.07918	1.063		6000	5000	3.77815	3.69897	0.979042		21600	10000	4.33445	4	0.922838
	60000	120000	4.77815	5.07918	1.063		15000	4200	4.17609	3.62325	0.867617		7870	2400	3.89597	3.38021	0.867616
	112720	5000	5.052	3.69897	0.732179		50000	20000	4.69897	4.30103	0.915313		70940	2000	4.85089	3.30103	0.6805
	122298	5000	5.08742	3.69897	0.727082		79700	1000	4.90146	3	0.612063		0	0	0	0	0
	50000	5000	4.69897	3.69897	0.787187		48000	4000	4.68124	3.60206	0.769467		54150	4000	4.7336	3.60206	0.760956
	50000	5000	4.69897	3.69897	0.787187		48000	4000	4.68124	3.60206	0.769467		54150	4000	4.7336	3.60206	0.760956
	35750	5000	4.55328	3.69897	0.812376		75311	0	4.87686	0	0		26990	0	4.4312	0	0
	45390	5000	4.65696	3.69897	0.794289		20700	500	4.31597	2.69897	0.625345		12000	0	4.07918	0	0
	60000	5000	4.77815	3.69897	0.774143		20000	400	4.30103	2.60206	0.604985		50000	2000	4.69897	3.30103	0.702501
	56570	120000	4.75259	5.07918	1.06872		44930	500	4.65254	2.69897	0.580107		45400	4000	4.65706	3.60206	0.773463
	61370	120000	4.78796	5.07918	1.06082		15300	2000	4.18469	3.30103	0.788835		31306	0	4.49563	0	0
	500000	120000	5.69897	5.07918	0.891245		100000	6000	5	3.77815	0.75563		2880	2000	3.45939	3.30103	0.954222
	13000	5000	4.11394	3.69897	0.89913		15000	450	4.17609	2.65321	0.635334		9850	4000	3.99344	3.60206	0.901995
	14200	120000	4.15229	5.07918	1.22322		5360	5000	3.72916	3.69897	0.991903		12190	3500	4.086	3.54407	0.867368
	22520	5000	4.35257	3.69897	0.849836		24010	300	4.38039	2.47712	0.565502		26547	400	4.42402	2.60206	0.588167
	52300	5000	4.7185	3.69897	0.783929		50000	1000	4.69897	3	0.638438		16030	1000	4.20493	3	0.713448
	133970	5000	5.12701	3.69897	0.721468		120000	200	5.07918	2.30103	0.453032		71520	1000	4.85443	3	0.617993
	133970	5000	5.12701	3.69897	0.721468		120000	200	5.07918	2.30103	0.453032		71520	1000	4.85443	3	0.617993
	56950	120000	4.75549	5.07918	1.06807		40850	1000	4.61119	3	0.650591		42640	1000	4.62982	3	0.647974
	51470	120000	4.71155	5.07918	1.07803		41120	2500	4.61405	3.39794	0.736433		80440	7500	4.90547	3.87506	0.789947
	40000	120000	4.60206	5.07918	1.10368		54770	70000	4.73854	4.8451	1.02249		66228	2000	4.82104	3.30103	0.684713
	67480	120000	4.82918	5.07918	1.05177		50135	1000	4.70014	3	0.638279		33205	700	4.5212	2.8451	0.629279
	91780	120000	4.96275	5.07918	1.02346		65000	3000	4.81291	3.47712	0.722457		109525	0	5.03951	0	0
	74280	5000	4.87087	3.69897	0.759406		62310	0	4.79456	0	0		102300	8000	5.00988	3.90309	0.779079
	55370	5000	4.74327	3.69897	0.779835		48000	950	4.68124	2.97772	0.636097		25140	2500	4.40037	3.39794	0.772195
	25000	5000	4.39794	3.69897	0.841069		23305	400	4.36745	2.60206	0.595785		2740	10000	3.43775	4	1.16355
	54200	5000	4.734	3.69897	0.781363		133200	0	5.1245	0	0		166200	100	5.22063	2	0.383095
	46800	5000	4.67025	3.69897	0.792029		41630	0	4.61941	0	0		53040	500	4.7246	2.69897	0.571259
	26300	5000	4.41996	3.69897	0.836879		45000	200	4.65321	2.30103	0.494504		0	0	0	0	0
	100950	120000	5.00411	5.07918	1.015		50000	0	4.69897	0	0		2180	1000	3.33846	3	0.898619
	75000	5000	4.87506	3.69897	0.758754		59000	0	4.77085	0	0		62800	2000	4.79796	3.30103	0.688007
	39370	120000	4.59517	5.07918	1.10533		15850	6000	4.20003	3.77815	0.899554		29201	15600	4.4654	4.19312	0.939026
	10000	5000	4	3.69897	0.924743		13780	1000	4.13925	3	0.724769		12500	800	4.09691	2.90309	0.708605
	27500	5000	4.43933	3.69897	0.833227		65600	2000	4.8169	3.30103	0.685301		53620	10000	4.72933	4	0.845786
	5000	120000	3.69897	5.07918	1.37313		7000	3000	3.8451	3.47712	0.9043		15608	1800	4.19335	3.25527	0.776295
	41700	5000	4.62014	3.69897	0.800619		75000	60000	4.87506	4.77815	0.980121		0	2000	1	3.30103	3.30103
	20000	120000	4.30103	5.07918	1.18092		11900	300	4.07555	2.47712	0.607801		21700	0	4.33646	0	0
	33500	120000	4.52504	5.07918	1.12246		31080	15000	4.49248	4.17609	0.929573		77900	1000	4.89154	3	0.613304
	5000	120000	3.69897	5.07918	1.37313		2500	8000	3.39794	3.90309	1.14866		2700	0	3.43136	0	0
	31500	5000	4.49831	3.69897	0.822302		2000	100	3.30103	2	0.605872		1700	20000	3.23045	4.30103	1.3314
	35000	120000	4.54407	5.07918	1.11776		10000	2000	4	3.30103	0.825257		36000	0	4.5563	0	0
	41600	120000	4.61909	5.07918	1.09961		24720	2000	4.39305	3.30103	0.751421		34300	1000	4.53529	3	0.661479
	60000	120000	4.77815	5.07918	1.063		92960	500	4.9683	2.69897	0.543239		37300	4000	4.57171	3.60206	0.787902
	13000	5000	4.11394	3.69897	0.89913		35450	10000	4.54962	4	0.879195		53090	2000	4.72501	3.30103	0.698629
	40000	120000	4.60206	5.07918	1.10368		40510	0	4.60756	0	0		40715	100	4.60975	2	0.433863
	30800	120000	4.48855	5.07918	1.13159		36000	2000	4.5563	3.30103	0.724498		35600	1000	4.55145	3	0.659131
	63500	120000	4.80277	5.07918	1.05755		26235	4000	4.41888	3.60206	0.815152		103510	7000	5.01498	3.8451	0.766722
	30000	5000	4.47712	3.69897	0.826194		99815	1000	4.9992	3	0.600097		68300	4500	4.83442	3.65321	0.755667
	50750	5000	4.70544	3.69897	0.786106		37000	100	4.5682	2	0.437809		0	100	1	2	2
	5100	5000	3.70757	3.69897	0.99768		53910	300	4.73167	2.47712	0.52352		9200	5000	3.96379	3.69897	0.933191
	5100	5000	3.70757	3.69897	0.99768		53910	300	4.73167	2.47712	0.52352		9200	5000	3.96379	3.69897	0.933191
	101950	5000	5.00839	3.69897	0.738555		117720	3000	5.07085	3.47712	0.685708		90620	800	4.95722	2.90309	0.585628
	60000	5000	4.77815	3.69897	0.774143		71870	2000	4.85655	3.30103	0.679707		50860	100	4.70638	2	0.424955
	98270	5000	4.99242	3.69897	0.740917		77870	2000	4.89137	3.30103	0.674868		0	0	0	0	0
	50600	5000	4.70415	3.69897	0.786321		35605	200	4.55151	2.30103	0.505553		72680	500	4.86141	2.69897	0.555182
	50600	5000	4.70415	3.69897	0.786321		35605	200	4.55151	2.30103	0.505553		72680	500	4.86141	2.69897	0.555182
	50600	5000	4.70415	3.69897	0.786321		35605	200	4.55151	2.30103	0.505553		72680	500	4.86141	2.69897	0.555182
	30000	5000	4.47712	3.69897	0.826194		20150	0	4.30428	0	0		29100	100	4.46389	2	0.448039
	89910	5000	4.95381	3.69897	0.746692		5200	1000	3.716	3	0.807319		47100	4859.94	4.67302	3.68663	0.788918
	30000	5000	4.47712	3.69897	0.826194		8600	500	3.9345	2.69897	0.685976		34600	400	4.53908	2.60206	0.573258
	20000	5000	4.30103	3.69897	0.86002		34700	800	4.54033	2.90309	0.639401		56800	500	4.75435	2.69897	0.567685
	15000	120000	4.17609	5.07918	1.21625		6600	500	3.81954	2.69897	0.706621		8800	1000	3.94448	3	0.760556
	30000	5000	4.47712	3.69897	0.826194		55200	0	4.74194	0	0		31000	500	4.49136	2.69897	0.600925
	30000	5000	4.47712	3.69897	0.826194		55200	0	4.74194	0	0		31000	500	4.49136	2.69897	0.600925
	74050	5000	4.86953	3.69897	0.759616		54000	1000	4.73239	3	0.633929		0	300	1	2.47712	2.47712
	40000	120000	4.60206	5.07918	1.10368		58120	10000	4.76433	4	0.839573		21900	1000	4.34044	3	0.691174
	20000	5000	4.30103	3.69897	0.86002		24000	10000	4.38021	4	0.913198		20350	10000	4.30856	4	0.928383
	15000	120000	4.17609	5.07918	1.21625		90020	6000	4.95434	3.77815	0.762594		66011.4	3000	4.81962	3.47712	0.721451
	32000	120000	4.50515	5.07918	1.12742		14800	700	4.17026	2.8451	0.682235		20500	500	4.31175	2.69897	0.625956
	15000	120000	4.17609	5.07918	1.21625		99500	6000	4.99782	3.77815	0.755959		41300	20000	4.61595	4.30103	0.931776
	15000	120000	4.17609	5.07918	1.21625		99500	6000	4.99782	3.77815	0.755959		41300	20000	4.61595	4.30103	0.931776
	34100	120000	4.53275	5.07918	1.12055		4400	1500	3.64345	3.17609	0.871726		16700	10000	4.22272	4	0.947258
	30000	120000	4.47712	5.07918	1.13447		40100	600	4.60314	2.77815	0.603533		110500	2000	5.04336	3.30103	0.65453
	25000	5000	4.39794	3.69897	0.841069		39900	1000	4.60097	3	0.652036		10000	3000	4	3.47712	0.86928
	8000	120000	3.90309	5.07918	1.30132		12140	15000	4.08422	4.17609	1.02249		12720	1000	4.10449	3	0.730907
	14000	5000	4.14613	3.69897	0.89215		8800	2000	3.94448	3.30103	0.836873		25600	10000	4.40824	4	0.907392
	37500	120000	4.57403	5.07918	1.11044		14700	0	4.16732	0	0		0	0	0	0	0
	60000	120000	4.77815	5.07918	1.063		31600	4000	4.49969	3.60206	0.800513		66200	500	4.82086	2.69897	0.559853
	24000	120000	4.38021	5.07918	1.15957		38000	6500	4.57978	3.81291	0.832553		22400	1000	4.35025	3	0.689616
	10500	5000	4.02119	3.69897	0.91987		2150	600	3.33244	2.77815	0.833669		10400	1000	4.01703	3	0.74682
	10000	5000	4	3.69897	0.924743		3520	5000	3.54654	3.69897	1.04298		2620	10000	3.4183	4	1.17017
	23610	120000	4.3731	5.07918	1.16146		57200	100	4.7574	2	0.420398		5000	100	3.69897	2	0.540691
	8820	120000	3.94547	5.07918	1.28735		1305	20000	3.11561	4.30103	1.38048		14800	360	4.17026	2.5563	0.612984
	65720	5000	4.8177	3.69897	0.767788		41000	500	4.61278	2.69897	0.585107		800	10000	2.90309	4	1.37784
	100000	5000	5	3.69897	0.739794		97000	3100	4.98677	3.49136	0.700125		107000	500	5.02938	2.69897	0.53664
	20000	5000	4.30103	3.69897	0.86002		30000	5000	4.47712	3.69897	0.826194		25000	200	4.39794	2.30103	0.523206
	37500	120000	4.57403	5.07918	1.11044		21460	3000	4.33163	3.47712	0.802728		98540	10000	4.99361	4	0.801023
	37500	120000	4.57403	5.07918	1.11044		21460	3000	4.33163	3.47712	0.802728		98540	10000	4.99361	4	0.801023
	45000	5000	4.65321	3.69897	0.794928		30160	10000	4.47943	4	0.89297		42451	3000	4.62789	3.47712	0.751341
	50000	120000	4.69897	5.07918	1.08091		33530	2000	4.52543	3.30103	0.72944		73940	1000	4.86888	3	0.616158
	69500	5000	4.84198	3.69897	0.763937		136220	5000	5.13424	3.69897	0.720451		98250	500	4.99233	2.69897	0.540623
	50000	120000	4.69897	5.07918	1.08091		43010	800	4.63357	2.90309	0.626534		83160	600	4.91991	2.77815	0.564675
	711700	120000	5.8523	5.07918	0.867895		16010	600	4.20439	2.77815	0.660774		56260	8000	4.7502	3.90309	0.821669
	711700	120000	5.8523	5.07918	0.867895		16010	600	4.20439	2.77815	0.660774		56260	8000	4.7502	3.90309	0.821669
	36580	5000	4.56324	3.69897	0.810601		35000	1000	4.54407	3	0.660201		13400	3000	4.1271	3.47712	0.842509
	107760	5000	5.03246	3.69897	0.735023		60500	2000	4.78176	3.30103	0.690339		109600	1000	5.03981	3	0.59526
	67000	5000	4.82607	3.69897	0.766455		182400	500	5.26102	2.69897	0.513012		10280	6000	4.01199	3.77815	0.941714
	32000	120000	4.50515	5.07918	1.12742		54400	500	4.7356	2.69897	0.569932		31100	500	4.49276	2.69897	0.600738
	15000	5000	4.17609	3.69897	0.885749		69000	1300	4.83885	3.11394	0.64353		20600	200	4.31387	2.30103	0.533403
	100000	5000	5	3.69897	0.739794		120900	8000	5.08243	3.90309	0.767958		90000	10000	4.95424	4	0.807389
	72360	5000	4.8595	3.69897	0.761183		40000	7000	4.60206	3.8451	0.835517		40000	2400	4.60206	3.38021	0.7345
	42800	120000	4.63144	5.07918	1.09667		8740	1100	3.94151	3.04139	0.771631		29600	600	4.47129	2.77815	0.621331
	55960	5000	4.74788	3.69897	0.779079		48540	0	4.6861	0	0		33860	14200	4.52969	4.15229	0.916683
	30000	120000	4.47712	5.07918	1.13447		35400	2000	4.549	3.30103	0.72566		9900	600	3.99564	2.77815	0.695297
	4300	5000	3.63347	3.69897	1.01803		22416	2400	4.35056	3.38021	0.77696		13300	800	4.12385	2.90309	0.703975
	57050	120000	4.75626	5.07918	1.06789		86204	5000	4.93553	3.69897	0.749458		40480	3000	4.60724	3.47712	0.754708
	40000	5000	4.60206	3.69897	0.803764		121400	5000	5.08422	3.69897	0.72754		51680	400	4.71332	2.60206	0.552065
	205100	120000	5.31197	5.07918	0.956177		128520	1000	5.10897	3	0.587202		189920	28000	5.27857	4.44716	0.842493
	75000	120000	4.87506	5.07918	1.04187		70000	800	4.8451	2.90309	0.599181		42500	500	4.62839	2.69897	0.583134
	152300	5000	5.1827	3.69897	0.713715		80310	3000	4.90477	3.47712	0.708927		86800	5000	4.93852	3.69897	0.749004
	1000	5000	3	3.69897	1.23299		80000	2000	4.90309	3.30103	0.673255		1400	3000	3.14613	3.47712	1.10521
	33120	5000	4.52009	3.69897	0.81834		40000	5000	4.60206	3.69897	0.803764		9580	4000	3.98137	3.60206	0.90473
	10000	120000	4	5.07918	1.2698		39010	600	4.59118	2.77815	0.605107		7849	1000	3.89481	3	0.770255
	52000	5000	4.716	3.69897	0.784344		80000	0	4.90309	0	0		40000	0	4.60206	0	0
	15000	120000	4.17609	5.07918	1.21625		60000	6000	4.77815	3.77815	0.790714		104500	1000	5.01912	3	0.597715
	60000	120000	4.77815	5.07918	1.063		80000	500	4.90309	2.69897	0.550463		103000	500	5.01284	2.69897	0.538412
	55000	120000	4.74036	5.07918	1.07148		60000	2000	4.77815	3.30103	0.690859		57000	80	4.75587	1.90309	0.400156
	71900	120000	4.85673	5.07918	1.0458		136600	3000	5.13545	3.47712	0.677082		31380	600	4.49665	2.77815	0.617826
	109200	120000	5.03822	5.07918	1.00813		60000	1000	4.77815	3	0.627858		36200	1400	4.55871	3.14613	0.690136
	50000	5000	4.69897	3.69897	0.787187		60000	500	4.77815	2.69897	0.564857		0	4000	1	3.60206	3.60206
	44600	120000	4.64933	5.07918	1.09245		17500	0	4.24304	0	0		0	0	0	0	0
	106300	5000	5.02653	3.69897	0.735889		97760	200	4.99016	2.30103	0.461113		84600	5000	4.92737	3.69897	0.750699
	100000	5000	5	3.69897	0.739794		55580	1500	4.74492	3.17609	0.669367		1000	0	3	0	0
	100000	5000	5	3.69897	0.739794		55580	1500	4.74492	3.17609	0.669367		1000	0	3	0	0
	2000	5000	3.30103	3.69897	1.12055		1220	500	3.08636	2.69897	0.874483		1600	50000	3.20412	4.69897	1.46654
	40000	120000	4.60206	5.07918	1.10368		35300	200	4.54777	2.30103	0.505968		19100	2000	4.28103	3.30103	0.771083
	82900	5000	4.91855	3.69897	0.752044		46100	1500	4.6637	3.17609	0.681024		80700	100	4.90687	2	0.407592
	40000	5000	4.60206	3.69897	0.803764		42100	0	4.62428	0	0		28300	0	4.45179	0	0
	40000	120000	4.60206	5.07918	1.10368		191300	2000	5.28171	3.30103	0.624992		44400	1000	4.64738	3	0.645525
	52000	120000	4.716	5.07918	1.07701		6600	1000	3.81954	3	0.785434		17400	800	4.24055	2.90309	0.684602
	3350	5000	3.52504	3.69897	1.04934		30000	50000	4.47712	4.69897	1.04955		2160	500	3.33445	2.69897	0.809419
	71750	5000	4.85582	3.69897	0.76176		120000	1000	5.07918	3	0.590646		45000	300	4.65321	2.47712	0.532346
	8800	5000	3.94448	3.69897	0.937758		5000	2000	3.69897	3.30103	0.892419		1080	300	3.03342	2.47712	0.816609
	45600	120000	4.65896	5.07918	1.0902		20000	2000	4.30103	3.30103	0.767498		30000	8000	4.47712	3.90309	0.871786
	215100	5000	5.33264	3.69897	0.693647		98300	10000	4.99255	4	0.801193		142700	10000	5.15442	4	0.776032
	12000	120000	4.07918	5.07918	1.24515		1000	3600	3	3.5563	1.18543		12000	1000	4.07918	3	0.735442
	20000	5000	4.30103	3.69897	0.86002		2280	4000	3.35793	3.60206	1.0727		1080	5000	3.03342	3.69897	1.2194
	41500	5000	4.61805	3.69897	0.800981		8000	6000	3.90309	3.77815	0.96799		26100	2100	4.41664	3.32222	0.752205
	5400	120000	3.73239	5.07918	1.36084		9100	2500	3.95904	3.39794	0.858273		1000	20000	3	4.30103	1.43368
	51400	120000	4.71096	5.07918	1.07816		34600	10000	4.53908	4	0.881237		160	4000	2.20412	3.60206	1.63424
	12240	120000	4.08778	5.07918	1.24253		15000	40000	4.17609	4.60206	1.102		1900	5000	3.27875	3.69897	1.12816
	31200	5000	4.49415	3.69897	0.823062		27000	11000	4.43136	4.04139	0.911998		48000	10000	4.68124	4	0.854474
	83800	5000	4.92324	3.69897	0.751328		98700	70000	4.99432	4.8451	0.970122		32300	3000	4.5092	3.47712	0.771117
	83800	5000	4.92324	3.69897	0.751328		98700	70000	4.99432	4.8451	0.970122		32300	3000	4.5092	3.47712	0.771117
	107200	5000	5.03019	3.69897	0.735353		43100	1000	4.63448	3	0.647322		86050	5000	4.93475	3.69897	0.749576
	62480	120000	4.79574	5.07918	1.0591		61000	1000	4.78533	3	0.626916		0	1000	1	3	3
	50000	5000	4.69897	3.69897	0.787187		25000	500	4.39794	2.69897	0.61369		22870	1000	4.35927	3	0.688189
	3000	5000	3.47712	3.69897	1.0638		2650	100	3.42325	2	0.584241		4430	1000	3.6464	3	0.822728
	36000	5000	4.5563	3.69897	0.811836		50000	40000	4.69897	4.60206	0.979376		25000	1000	4.39794	3	0.682138
	10440	5000	4.0187	3.69897	0.920439		20000	3000	4.30103	3.47712	0.808439		11020	0	4.04218	0	0
	13000	5000	4.11394	3.69897	0.89913		14880	15000	4.1726	4.17609	1.00084		1560	800	3.19312	2.90309	0.909169
	51200	120000	4.70927	5.07918	1.07855		15400	2000	4.18752	3.30103	0.788302		40000	1000	4.60206	3	0.651882
	100000	120000	5	5.07918	1.01584		38700	2000	4.58771	3.30103	0.719537		12000	500	4.07918	2.69897	0.661645
	53800	120000	4.73078	5.07918	1.07365		36485	2500	4.56211	3.39794	0.744817		0	0	0	0	0
	6680	5000	3.82478	3.69897	0.967108		5800	360	3.76343	2.5563	0.679248		0	20000	1	4.30103	4.30103
	30000	5000	4.47712	3.69897	0.826194		42650	3600	4.62992	3.5563	0.768113		0	180000	1	5.25527	5.25527
	6000	5000	3.77815	3.69897	0.979042		40001	500	4.60207	2.69897	0.586469		20000	0	4.30103	0	0
	50300	120000	4.70157	5.07918	1.08032		60000	3000	4.77815	3.47712	0.727713		0	1000	1	3	3
	20000	5000	4.30103	3.69897	0.86002		25000	0	4.39794	0	0		0	0	0	0	0
	50000	120000	4.69897	5.07918	1.08091		3000	11000	3.47712	4.04139	1.16228		15500	500	4.19033	2.69897	0.644095
	50000	120000	4.69897	5.07918	1.08091		3000	11000	3.47712	4.04139	1.16228		15500	500	4.19033	2.69897	0.644095
	15000	5000	4.17609	3.69897	0.885749		2400	1500	3.38021	3.17609	0.939613		6270	3000	3.79727	3.47712	0.91569
	60000	120000	4.77815	5.07918	1.063		66800	7000	4.82478	3.8451	0.796948		24900	50	4.3962	1.69897	0.386463
	5000	120000	3.69897	5.07918	1.37313		4000	2500	3.60206	3.39794	0.943332		10440	780	4.0187	2.89209	0.719659
	4000	5000	3.60206	3.69897	1.0269		3000	2400	3.47712	3.38021	0.972129		3733	3600	3.57206	3.5563	0.995589
	12400	5000	4.09342	3.69897	0.903638		19250	7000	4.28443	3.8451	0.897458		11850	13000	4.07372	4.11394	1.00987
	18100	5000	4.25768	3.69897	0.868776		16160	1500	4.20844	3.17609	0.754695		8200	8500	3.91381	3.92942	1.00399
	4000	5000	3.60206	3.69897	1.0269		2000	1000	3.30103	3	0.908807		15200	750	4.18184	2.87506	0.68751
	6000	120000	3.77815	5.07918	1.34436		3000	200	3.47712	2.30103	0.661763		1450	2000	3.16137	3.30103	1.04418
	11960	5000	4.07773	3.69897	0.907115		2000	3000	3.30103	3.47712	1.05334		6200	4000	3.79239	3.60206	0.949812
	66290	5000	4.82145	3.69897	0.767191		65970	7000	4.81935	3.8451	0.797846		520	2550	2.716	3.40654	1.25425
	10000	120000	4	5.07918	1.2698		7000	100	3.8451	2	0.520143		7665	2000	3.88451	3.30103	0.849793
	11000	5000	4.04139	3.69897	0.915271		33000	0	4.51851	0	0		25100	200	4.39967	2.30103	0.523
	17500	120000	4.24304	5.07918	1.19706		0	1800	1	3.25527	3.25527		11800	20500	4.07188	4.31175	1.05891
	30000	120000	4.47712	5.07918	1.13447		25400	3000	4.40483	3.47712	0.789388		2300	800	3.36173	2.90309	0.863571
	30000	5000	4.47712	3.69897	0.826194		10000	1000	4	3	0.75		52400	1000	4.71933	3	0.635683
	10000	120000	4	5.07918	1.2698		10000	300	4	2.47712	0.61928		31500	2000	4.49831	3.30103	0.733838
	37500	5000	4.57403	3.69897	0.808689		78900	3000	4.89708	3.47712	0.71004		77300	1000	4.88818	3	0.613725
	10000	5000	4	3.69897	0.924743		10000	300	4	2.47712	0.61928		56000	0	4.74819	0	0
	100000	5000	5	3.69897	0.739794		57610	2500	4.7605	3.39794	0.713778		172000	100	5.23553	2	0.382005
	121990	5000	5.08632	3.69897	0.727238		58300	5000	4.76567	3.69897	0.77617		70400	500	4.84757	2.69897	0.556767
	6000	5000	3.77815	3.69897	0.979042		15300	30000	4.18469	4.47712	1.06988		11300	1000	4.05308	3	0.740178
	59450	5000	4.77415	3.69897	0.774791		72100	1900	4.85794	3.27875	0.674927		37400	300	4.57287	2.47712	0.541699
	60000	5000	4.77815	3.69897	0.774143		12000	10000	4.07918	4	0.980589		12300	500	4.08991	2.69897	0.65991
	12000	5000	4.07918	3.69897	0.906792		66150	5000	4.82053	3.69897	0.767337		10760	2000	4.03181	3.30103	0.818746
	80000	5000	4.90309	3.69897	0.754416		100000	2000	5	3.30103	0.660206		0	0	0	0	0
	60000	120000	4.77815	5.07918	1.063		80000	5000	4.90309	3.69897	0.754416		10600	1000	4.02531	3	0.745285
	1260	5000	3.10037	3.69897	1.19307		1000	4000	3	3.60206	1.20069		0	0	0	0	0
	10000	5000	4	3.69897	0.924743		43220	500	4.63568	2.69897	0.582216		13300	500	4.12385	2.69897	0.654478
	35000	120000	4.54407	5.07918	1.11776		34300	300	4.53529	2.47712	0.546188		35000	1000	4.54407	3	0.660201
	35000	120000	4.54407	5.07918	1.11776		34300	300	4.53529	2.47712	0.546188		35000	1000	4.54407	3	0.660201
	87250	120000	4.94077	5.07918	1.02802		50000	500	4.69897	2.69897	0.574375		38100	500	4.58092	2.69897	0.589176
	100000	5000	5	3.69897	0.739794		130000	300	5.11394	2.47712	0.484386		51900	200	4.71517	2.30103	0.488006
	80000	5000	4.90309	3.69897	0.754416		39260	1500	4.59395	3.17609	0.691364		85000	0	4.92942	0	0
	80000	5000	4.90309	3.69897	0.754416		39260	1500	4.59395	3.17609	0.691364		85000	0	4.92942	0	0
	50000	5000	4.69897	3.69897	0.787187		60000	10000	4.77815	4	0.837144		7600	2000	3.88081	3.30103	0.850603
	37500	5000	4.57403	3.69897	0.808689		10000	1700	4	3.23045	0.807612		69800	2000	4.84386	3.30103	0.681488
	40000	5000	4.60206	3.69897	0.803764		55850	300	4.74702	2.47712	0.521826		42280	0	4.62613	0	0
	30000	5000	4.47712	3.69897	0.826194		20500	600	4.31175	2.77815	0.64432		230600	3000	5.36286	3.47712	0.648371
	30000	5000	4.47712	3.69897	0.826194		20500	600	4.31175	2.77815	0.64432		230600	3000	5.36286	3.47712	0.648371
	10	5000	1	3.69897	3.69897		20000	1000	4.30103	3	0.697507		30000	4000	4.47712	3.60206	0.804548
	10	5000	1	3.69897	3.69897		20000	1000	4.30103	3	0.697507		30000	4000	4.47712	3.60206	0.804548
	25000	5000	4.39794	3.69897	0.841069		60000	10000	4.77815	4	0.837144		38300	200	4.5832	2.30103	0.502058
	65000	5000	4.81291	3.69897	0.768551		50000	5000	4.69897	3.69897	0.787187		27700	200	4.44248	2.30103	0.517961
	65000	5000	4.81291	3.69897	0.768551		50000	5000	4.69897	3.69897	0.787187		27700	200	4.44248	2.30103	0.517961
	5000	5000	3.69897	3.69897	1		2000	0	3.30103	0	0		15300	200	4.18469	2.30103	0.549868
	124650	5000	5.09569	3.69897	0.725901		75600	500	4.87852	2.69897	0.553235		45850	2000	4.66134	3.30103	0.708172
	40000	5000	4.60206	3.69897	0.803764		34400	3000	4.53656	3.47712	0.766467		300	300	2.47712	2.47712	1
	50000	120000	4.69897	5.07918	1.08091		43450	50	4.63799	1.69897	0.366316		44750	300	4.65079	2.47712	0.532623
	20000	120000	4.30103	5.07918	1.18092		34900	2400	4.54283	3.38021	0.744077		65320	20000	4.81505	4.30103	0.893248
	100000	5000	5	3.69897	0.739794		31350	0	4.49624	0	0		42600	400	4.62941	2.60206	0.562072
	96250	120000	4.9834	5.07918	1.01922		53300	3000	4.72673	3.47712	0.73563		94240	13000	4.97424	4.11394	0.82705
	72000	5000	4.85733	3.69897	0.761523		43350	4000	4.63699	3.60206	0.77681		20200	3000	4.30535	3.47712	0.807628
	48050	120000	4.68169	5.07918	1.0849		35000	200	4.54407	2.30103	0.506381		14800	0	4.17026	0	0
	20000	120000	4.30103	5.07918	1.18092		100000	800	5	2.90309	0.580618		41080	500	4.61363	2.69897	0.584999
	40000	120000	4.60206	5.07918	1.10368		64350	1000	4.80855	3	0.623889		41680	1000	4.61993	3	0.649361
	5000	120000	3.69897	5.07918	1.37313		36670	26000	4.56431	4.41497	0.967281		27000	3000	4.43136	3.47712	0.784662
	25000	5000	4.39794	3.69897	0.841069		20000	2000	4.30103	3.30103	0.767498		1800	1000	3.25527	3	0.921582
	20000	5000	4.30103	3.69897	0.86002		25200	3000	4.4014	3.47712	0.790003		23770	3000	4.37603	3.47712	0.794584
	78165	5000	4.89301	3.69897	0.75597		40850	300	4.61119	2.47712	0.537198		188760	7000	5.27591	3.8451	0.728803
	66000	5000	4.81954	3.69897	0.767494		79400	5000	4.89982	3.69897	0.754919		52600	2000	4.72099	3.30103	0.699225
	25000	5000	4.39794	3.69897	0.841069		27000	800	4.43136	2.90309	0.655123		20320	1200	4.30792	3.07918	0.714772
	80500	5000	4.9058	3.69897	0.754		47500	1000	4.67669	3	0.641479		72880	500	4.86261	2.69897	0.555046
	73840	5000	4.86829	3.69897	0.759809		88720	1000	4.94802	3	0.606303		48800	1000	4.68842	3	0.639874
	40000	5000	4.60206	3.69897	0.803764		36000	300	4.5563	2.47712	0.543669		31200	500	4.49415	2.69897	0.600551
	62340	120000	4.79477	5.07918	1.05932		54165	1500	4.73372	3.17609	0.670951		27830	12000	4.44451	4.07918	0.917802
	13000	5000	4.11394	3.69897	0.89913		7060	1000	3.8488	3	0.779463		1860	100000	3.26951	5	1.52928
	46280	5000	4.66539	3.69897	0.792853		48450	300	4.68529	2.47712	0.528701		3600	2000	3.5563	3.30103	0.92822
	30000	5000	4.47712	3.69897	0.826194		24800	73000	4.39445	4.86332	1.1067		34275	5000	4.53498	3.69897	0.815653
	15000	5000	4.17609	3.69897	0.885749		79400	1000	4.89982	3	0.612267		35100	1000	4.54531	3	0.660021
	42300	120000	4.62634	5.07918	1.09788		134330	300	5.12817	2.47712	0.483042		22460	1000	4.35141	3	0.689432
	30000	120000	4.47712	5.07918	1.13447		10	1000	1	3	3		54400	7000	4.7356	3.8451	0.811956
	55800	5000	4.74663	3.69897	0.779283		10600	5000	4.02531	3.69897	0.918929		0	10000	1	4	4
	40000	120000	4.60206	5.07918	1.10368		37830	1000	4.57784	3	0.655331		71100	500	4.85187	2.69897	0.556274
	42100	120000	4.62428	5.07918	1.09837		74760	500	4.87367	2.69897	0.553786		32820	0	4.51614	0	0
	217320	5000	5.3371	3.69897	0.693067		64700	7000	4.8109	3.8451	0.799246		91900	8000	4.96332	3.90309	0.786388
	20000	120000	4.30103	5.07918	1.18092		22030	3000	4.34301	3.47712	0.800624		4400	4000	3.64345	3.60206	0.988639
	20000	120000	4.30103	5.07918	1.18092		22030	3000	4.34301	3.47712	0.800624		4400	4000	3.64345	3.60206	0.988639
	20000	120000	4.30103	5.07918	1.18092		13360	11000	4.12581	4.04139	0.97954		25400	500	4.40483	2.69897	0.612729
	56735	5000	4.75385	3.69897	0.7781		40000	0	4.60206	0	0		8	1000	0.90309	3	3.32193
	24800	120000	4.39445	5.07918	1.15582		22500	500	4.35218	2.69897	0.620142		36800	500	4.56585	2.69897	0.591121
	14000	5000	4.14613	3.69897	0.89215		10000	500	4	2.69897	0.674743		5420	100	3.734	2	0.535619
	6260	120000	3.79657	5.07918	1.33783		47120	40000	4.67321	4.60206	0.984776		9500	8000	3.97772	3.90309	0.981237
	40600	5000	4.60853	3.69897	0.802636		59560	16600	4.77495	4.22011	0.883801		3560	15000	3.55145	4.17609	1.17588
	40000	120000	4.60206	5.07918	1.10368		104900	500	5.02078	2.69897	0.53756		10300	0	4.01284	0	0
	40000	120000	4.60206	5.07918	1.10368		104900	500	5.02078	2.69897	0.53756		10300	0	4.01284	0	0
	18310	5000	4.26269	3.69897	0.867755		31361	5000	4.49639	3.69897	0.822653		11790	6000	4.07151	3.77815	0.927948
	33852	5000	4.52958	3.69897	0.816625		9000	1800	3.95424	3.25527	0.823235		14320	22000	4.15594	4.34242	1.04487
	88780	5000	4.94832	3.69897	0.747521		114700	6000	5.05956	3.77815	0.746735		66300	2000	4.82151	3.30103	0.684646
	43600	5000	4.63949	3.69897	0.79728		26700	2300	4.42651	3.36173	0.759453		28420	600	4.45362	2.77815	0.623796
	80000	5000	4.90309	3.69897	0.754416		32300	800	4.5092	2.90309	0.643815		36000	600	4.5563	2.77815	0.609738
	18000	5000	4.25527	3.69897	0.869267		50000	100	4.69897	2	0.425625		104500	3240	5.01912	3.51055	0.699435
	40000	120000	4.60206	5.07918	1.10368		70000	20000	4.8451	4.30103	0.887708		0	2000	1	3.30103	3.30103
	38700	5000	4.58771	3.69897	0.806278		5000	3000	3.69897	3.47712	0.940024		1370	6000	3.13672	3.77815	1.20449
	40000	5000	4.60206	3.69897	0.803764		54000	2000	4.73239	3.30103	0.697539		48000	2000	4.68124	3.30103	0.705161
	17000	120000	4.23045	5.07918	1.20062		18000	5000	4.25527	3.69897	0.869267		10440	5000	4.0187	3.69897	0.920439
	17000	120000	4.23045	5.07918	1.20062		18000	5000	4.25527	3.69897	0.869267		10440	5000	4.0187	3.69897	0.920439
	30000	5000	4.47712	3.69897	0.826194		10000	1300	4	3.11394	0.778486		45500	4000	4.65801	3.60206	0.773304
	9800	5000	3.99123	3.69897	0.926775		5000	500	3.69897	2.69897	0.729654		3950	500	3.5966	2.69897	0.750423
	12000	5000	4.07918	3.69897	0.906792		20000	400	4.30103	2.60206	0.604985		29010	200	4.46255	2.30103	0.515631
	54600	5000	4.73719	3.69897	0.780836		30000	5000	4.47712	3.69897	0.826194		24000	200	4.38021	2.30103	0.525324
	3690	120000	3.56703	5.07918	1.42393		2000	5000	3.30103	3.69897	1.12055		1080	5000	3.03342	3.69897	1.2194
	2976	5000	3.47363	3.69897	1.06487		4000	100	3.60206	2	0.555238		2160	0	3.33445	0	0
	220000	5000	5.34242	3.69897	0.692377		27010	4000	4.43152	3.60206	0.812826		24030	3000	4.38075	3.47712	0.793727
	66000	120000	4.81954	5.07918	1.05387		10000	0	4	0	0		36000	10000	4.5563	4	0.877905
	400000	120000	5.60206	5.07918	0.906663		140000	80000	5.14613	4.90309	0.952773		20000	10000	4.30103	4	0.93001
	40300	5000	4.60531	3.69897	0.803198		18000	3500	4.25527	3.54407	0.832865		24000	5000	4.38021	3.69897	0.844473
	7650	120000	3.88366	5.07918	1.30783		3000	3000	3.47712	3.47712	1		1920	6000	3.2833	3.77815	1.15072
	1092	5000	3.03822	3.69897	1.21748		1200	2500	3.07918	3.39794	1.10352		1080	700	3.03342	2.8451	0.937916
	50000	120000	4.69897	5.07918	1.08091		40000	10000	4.60206	4	0.869176		7000	3000	3.8451	3.47712	0.9043
	13320	5000	4.1245	3.69897	0.896828		21610	1500	4.33465	3.17609	0.732721		15000	1000	4.17609	3	0.718375
	4600	120000	3.66276	5.07918	1.38671		6300	300	3.79934	2.47712	0.651987		6000	0	3.77815	0	0
	40000	120000	4.60206	5.07918	1.10368		30000	13000	4.47712	4.11394	0.918881		32400	5000	4.51055	3.69897	0.820072
	94920	5000	4.97736	3.69897	0.743159		36010	6000	4.55642	3.77815	0.829192		60000	0	4.77815	0	0
	4000	5000	3.60206	3.69897	1.0269		5000	5000	3.69897	3.69897	1		2160	2000	3.33445	3.30103	0.989976
	11480	5000	4.05994	3.69897	0.911089		5000	0	3.69897	0	0		20960	0	4.32139	0	0
	10520	5000	4.02202	3.69897	0.919681		3000	300	3.47712	2.47712	0.712406		1900	1500	3.27875	3.17609	0.968689
	12200	5000	4.08636	3.69897	0.905199		10100	0	4.00432	0	0		19000	0	4.27875	0	0
	10000	120000	4	5.07918	1.2698		4000	2000	3.60206	3.30103	0.916428		800	5000	2.90309	3.69897	1.27415
	80000	120000	4.90309	5.07918	1.03591		25000	25000	4.39794	4.39794	1		6500	2000	3.81291	3.30103	0.86575
	73850	5000	4.86835	3.69897	0.759799		50600	0	4.70415	0	0		43600	5000	4.63949	3.69897	0.79728
	60000	5000	4.77815	3.69897	0.774143		88500	10000	4.94694	4	0.80858		73060	10000	4.86368	4	0.822423
	5500	5000	3.74036	3.69897	0.988934		25000	200	4.39794	2.30103	0.523206		28500	300	4.45484	2.47712	0.556051
	13000	120000	4.11394	5.07918	1.23463		26200	2000	4.4183	3.30103	0.747127		4200	1000	3.62325	3	0.827986
	40000	5000	4.60206	3.69897	0.803764		12000	700	4.07918	2.8451	0.697468		25100	0	4.39967	0	0
	40000	5000	4.60206	3.69897	0.803764		12000	700	4.07918	2.8451	0.697468		25100	0	4.39967	0	0
	40000	5000	4.60206	3.69897	0.803764		12000	700	4.07918	2.8451	0.697468		25100	0	4.39967	0	0
	53732	120000	4.73023	5.07918	1.07377		34700	2000	4.54033	3.30103	0.727046		99680	0	4.99861	0	0
	27600	5000	4.44091	3.69897	0.832931		30000	300	4.47712	2.47712	0.553284		17500	0	4.24304	0	0
	5760	120000	3.76042	5.07918	1.35069		50000	5000	4.69897	3.69897	0.787187		25780	0	4.41128	0	0
	28000	5000	4.44716	3.69897	0.83176		88800	600	4.94841	2.77815	0.561423		8040	400	3.90526	2.60206	0.666297
	28000	5000	4.44716	3.69897	0.83176		88800	600	4.94841	2.77815	0.561423		8040	400	3.90526	2.60206	0.666297
	35000	120000	4.54407	5.07918	1.11776		40000	1200	4.60206	3.07918	0.669088		9700	1200	3.98677	3.07918	0.77235
	26000	5000	4.41497	3.69897	0.837824		17000	1200	4.23045	3.07918	0.727862		24000	700	4.38021	2.8451	0.649534
	37500	120000	4.57403	5.07918	1.11044		89500	2000	4.95182	3.30103	0.666629		19700	0	4.29447	0	0
	35000	5000	4.54407	3.69897	0.814022		20000	1000	4.30103	3	0.697507		14500	2000	4.16137	3.30103	0.793256
	106100	120000	5.02572	5.07918	1.01064		50000	1000	4.69897	3	0.638438		80610	1500	4.90639	3.17609	0.647338
	40000	120000	4.60206	5.07918	1.10368		40000	1000	4.60206	3	0.651882		8900	500	3.94939	2.69897	0.683389
	33550	120000	4.52569	5.07918	1.1223		16000	7000	4.20412	3.8451	0.914602		57000	0	4.75587	0	0
	80000	5000	4.90309	3.69897	0.754416		140000	6000	5.14613	3.77815	0.734174		134780	0	5.12963	0	0
	40000	120000	4.60206	5.07918	1.10368		4600	2000	3.66276	3.30103	0.901242		1000	300	3	2.47712	0.825707
	47650	120000	4.67806	5.07918	1.08574		23000	300	4.36173	2.47712	0.567922		0	0	0	0	0
	60000	5000	4.77815	3.69897	0.774143		47001	400	4.67211	2.60206	0.556935		19000	0	4.27875	0	0
	10000	5000	4	3.69897	0.924743		6500	1000	3.81291	3	0.7868		12500	600	4.09691	2.77815	0.678109
	15400	5000	4.18752	3.69897	0.883332		24500	6000	4.38917	3.77815	0.86079		26300	500	4.41996	2.69897	0.610633
	960	5000	2.98227	3.69897	1.24032		2000	700	3.30103	2.8451	0.861882		2780	500	3.44404	2.69897	0.783663
	10000	5000	4	3.69897	0.924743		62700	17000	4.79727	4.23045	0.881846		43000	42000	4.63347	4.62325	0.997794
	80500	120000	4.9058	5.07918	1.03534		50080	1000	4.69966	3	0.638343		13300	0	4.12385	0	0
	80500	120000	4.9058	5.07918	1.03534		50080	1000	4.69966	3	0.638343		13300	0	4.12385	0	0
	27020	5000	4.43169	3.69897	0.834664		48800	0	4.68842	0	0		29800	200	4.47422	2.30103	0.514287
	30000	120000	4.47712	5.07918	1.13447		30000	2000	4.47712	3.30103	0.737311		69000	1000	4.83885	3	0.619982
	20000	5000	4.30103	3.69897	0.86002		19200	15000	4.2833	4.17609	0.97497		33580	10000	4.52608	4	0.883767
	38300	120000	4.5832	5.07918	1.10822		21000	4000	4.32222	3.60206	0.833382		45880	3000	4.66162	3.47712	0.745904
	3650	5000	3.56229	3.69897	1.03837		40000	1000	4.60206	3	0.651882		23000	1000	4.36173	3	0.687801
	5560	5000	3.74507	3.69897	0.987689		21000	2000	4.32222	3.30103	0.763735		2320	500	3.36549	2.69897	0.801955
	20000	5000	4.30103	3.69897	0.86002		20000	10000	4.30103	4	0.93001		19500	3000	4.29003	3.47712	0.810511
	23000	5000	4.36173	3.69897	0.848052		43500	4000	4.63849	3.60206	0.776559		4500	1000	3.65321	3	0.821195
	68000	120000	4.83251	5.07918	1.05104		50000	700	4.69897	2.8451	0.605473		32420	1000	4.51081	3	0.665069
	69920	5000	4.8446	3.69897	0.763524		80000	2000	4.90309	3.30103	0.673255		37900	1400	4.57864	3.14613	0.687132
	45000	5000	4.65321	3.69897	0.794928		45000	1000	4.65321	3	0.644716		35000	3500	4.54407	3.54407	0.779933
	16000	120000	4.20412	5.07918	1.20814		35000	1500	4.54407	3.17609	0.698953		10000	5000	4	3.69897	0.924743
	24000	5000	4.38021	3.69897	0.844473		48000	1000	4.68124	3	0.640856		0	300	1	2.47712	2.47712
	76400	5000	4.88309	3.69897	0.757505		33500	200	4.52504	2.30103	0.50851		36000	0	4.5563	0	0
	60000	120000	4.77815	5.07918	1.063		20000	200	4.30103	2.30103	0.534995		27900	3000	4.4456	3.47712	0.782148
	60000	120000	4.77815	5.07918	1.063		20000	200	4.30103	2.30103	0.534995		27900	3000	4.4456	3.47712	0.782148
	62865	5000	4.79841	3.69897	0.770874		50000	800	4.69897	2.90309	0.617814		30600	500	4.48572	2.69897	0.60168
	55400	120000	4.74351	5.07918	1.07076		50000	1000	4.69897	3	0.638438		2000	5000	3.30103	3.69897	1.12055
	7000	5000	3.8451	3.69897	0.961996		7000	100	3.8451	2	0.520143		55040	360	4.74068	2.5563	0.539227
	7000	5000	3.8451	3.69897	0.961996		10000	8000	4	3.90309	0.975772		2000	10000	3.30103	4	1.21174
	9125	5000	3.96023	3.69897	0.934028		5250	100	3.72016	2	0.537611		6600	300	3.81954	2.47712	0.648538
	50000	120000	4.69897	5.07918	1.08091		15000	300	4.17609	2.47712	0.593167		5500	300	3.74036	2.47712	0.662268
	31000	120000	4.49136	5.07918	1.13088		34210	3000	4.53415	3.47712	0.766873		24203	12000	4.38387	4.07918	0.930498
	87300	5000	4.94101	3.69897	0.748626		72560	4000	4.8607	3.60206	0.741058		0	3000	1	3.47712	3.47712
	50000	5000	4.69897	3.69897	0.787187		50000	600	4.69897	2.77815	0.591226		47635	500	4.67793	2.69897	0.576959
	112900	5000	5.05269	3.69897	0.732079		56760	720	4.75404	2.85733	0.601032		42430	420	4.62767	2.62325	0.566861
	112900	5000	5.05269	3.69897	0.732079		56760	720	4.75404	2.85733	0.601032		42430	420	4.62767	2.62325	0.566861
	30550	5000	4.48501	3.69897	0.82474		33700	240	4.52763	2.38021	0.525708		14515	500	4.16182	2.69897	0.648508
	71400	5000	4.8537	3.69897	0.762093		58800	400	4.76938	2.60206	0.545576		48492	10000	4.68567	4	0.853667
	8000	5000	3.90309	3.69897	0.947703		10000	240	4	2.38021	0.595053		21670	200	4.33586	2.30103	0.530698
	100000	5000	5	3.69897	0.739794		55000	0	4.74036	0	0		122900	1000	5.08955	3	0.589443
	80000	5000	4.90309	3.69897	0.754416		59000	2000	4.77085	3.30103	0.691916		6500	1500	3.81291	3.17609	0.832983
	72800	5000	4.86213	3.69897	0.760771		20500	480	4.31175	2.68124	0.621845		1800	1800	3.25527	3.25527	1
	54050	120000	4.7328	5.07918	1.07319		20000	0	4.30103	0	0		90400	1000	4.95617	3	0.605306
	32800	5000	4.51587	3.69897	0.819104		20000	5000	4.30103	3.69897	0.86002		4500	300	3.65321	2.47712	0.678067
	50460	120000	4.70295	5.07918	1.08		88560	11800	4.94724	4.07188	0.823062		54000	3000	4.73239	3.47712	0.734749
	60000	120000	4.77815	5.07918	1.063		25800	2000	4.41162	3.30103	0.748258		66760	2000	4.82452	3.30103	0.68422
	39580	120000	4.59748	5.07918	1.10478		28410	14500	4.45347	4.16137	0.93441		34530	0	4.5382	0	0
	150000	5000	5.17609	3.69897	0.714626		101000	600	5.00432	2.77815	0.55515		0	0	0	0	0
	75000	5000	4.87506	3.69897	0.758754		63116	80000	4.80014	4.90309	1.02145		7500	0	3.87506	0	0
	10000	5000	4	3.69897	0.924743		41000	0	4.61278	0	0		75070	1000	4.87547	3	0.615326
	40000	5000	4.60206	3.69897	0.803764		125900	250	5.10003	2.39794	0.470182		55200	0	4.74194	0	0
	237000	5000	5.37475	3.69897	0.688213		180450	2000	5.25636	3.30103	0.628007		169430	5000	5.22899	3.69897	0.707397
	45000	5000	4.65321	3.69897	0.794928		30000	8500	4.47712	3.92942	0.877666		101140	6000	5.00492	3.77815	0.754887
	12000	120000	4.07918	5.07918	1.24515		122100	13000	5.08672	4.11394	0.808762		0	400	1	2.60206	2.60206
	40000	5000	4.60206	3.69897	0.803764		250800	10000	5.39933	4	0.740833		64200	16000	4.80754	4.20412	0.874486
	58850	120000	4.76975	5.07918	1.06487		260000	1500	5.41497	3.17609	0.586539		100000	200	5	2.30103	0.460206
	90000	5000	4.95424	3.69897	0.746627		10000	0	4	0	0		39700	200	4.59879	2.30103	0.500355
	42350	120000	4.62685	5.07918	1.09776		38260	60	4.58274	1.77815	0.38801		37400	200	4.57287	2.30103	0.503191
	60000	120000	4.77815	5.07918	1.063		90000	5000	4.95424	3.69897	0.746627		0	0	0	0	0
	80000	5000	4.90309	3.69897	0.754416		46900	5000	4.67117	3.69897	0.791872		45340	120000	4.65648	5.07918	1.09078
	284000	5000	5.45332	3.69897	0.678297		100000	4000	5	3.60206	0.720412		164300	2000	5.21564	3.30103	0.63291
	20000	5000	4.30103	3.69897	0.86002		54440	1000	4.73592	3	0.633457		0	300	1	2.47712	2.47712
	52000	5000	4.716	3.69897	0.784344		91200	5000	4.95999	3.69897	0.745761		65970	300	4.81935	2.47712	0.513995
	123000	120000	5.08991	5.07918	0.997893		42000	1000	4.62325	3	0.648894		40660	10000	4.60917	4	0.867836
	80780	120000	4.9073	5.07918	1.03502		30000	1500	4.47712	3.17609	0.709405		70300	50	4.84696	1.69897	0.350523
	50010	120000	4.69906	5.07918	1.08089		86400	1000	4.93651	3	0.607716		42605	10000	4.62946	4	0.864032
	105004	5000	5.02121	3.69897	0.73667		53600	200	4.72916	2.30103	0.486562		10000	100	4	2	0.5
	100000	5000	5	3.69897	0.739794		94500	10000	4.97543	4	0.80395		75260	1500	4.87656	3.17609	0.651297
	8000	5000	3.90309	3.69897	0.947703		13900	1000	4.14301	3	0.72411		40820	10000	4.61087	4	0.867515
	8000	5000	3.90309	3.69897	0.947703		13900	1000	4.14301	3	0.72411		40820	10000	4.61087	4	0.867515
	32130	120000	4.50691	5.07918	1.12698		40200	2000	4.60423	3.30103	0.716957		51780	1500	4.71416	3.17609	0.673734
	600	5000	2.77815	3.69897	1.33145		57600	200	4.76042	2.30103	0.483367		26800	5000	4.42813	3.69897	0.835334
	80000	5000	4.90309	3.69897	0.754416		55000	1000	4.74036	3	0.632863		35044	3000	4.54461	3.47712	0.765108
	60000	5000	4.77815	3.69897	0.774143		40000	500	4.60206	2.69897	0.58647		126350	15000	5.10158	4.17609	0.818589
	44600	5000	4.64933	3.69897	0.795591		30000	300	4.47712	2.47712	0.553284		6500	0	3.81291	0	0
	132000	120000	5.12057	5.07918	0.991916		40410	4000	4.60649	3.60206	0.781953		55900	4000	4.74741	3.60206	0.758742
	195000	120000	5.29003	5.07918	0.960141		185000	4200	5.26717	3.62325	0.687893		63720	5000	4.80428	3.69897	0.769933
	40000	5000	4.60206	3.69897	0.803764		22200	200	4.34635	2.30103	0.529416		82100	1500	4.91434	3.17609	0.64629
	65000	5000	4.81291	3.69897	0.768551		45000	500	4.65321	2.69897	0.580023		50000	2000	4.69897	3.30103	0.702501
	104700	5000	5.01995	3.69897	0.736854		17500	7000	4.24304	3.8451	0.906213		28100	4000	4.44871	3.60206	0.809687
	18000	5000	4.25527	3.69897	0.869267		60600	2000	4.78247	3.30103	0.690235		21000	500	4.32222	2.69897	0.624441
	157600	5000	5.19756	3.69897	0.711675		51524	300	4.71201	2.47712	0.525704		11044	600	4.04313	2.77815	0.687129
	160000	5000	5.20412	3.69897	0.710777		160000	600	5.20412	2.77815	0.533837		99000	0	4.99564	0	0
	10000	120000	4	5.07918	1.2698		27000	2400	4.43136	3.38021	0.762793		30160	3000	4.47943	3.47712	0.776242
	18000	5000	4.25527	3.69897	0.869267		130000	20000	5.11394	4.30103	0.84104		127100	500	5.10415	2.69897	0.52878
	15000	5000	4.17609	3.69897	0.885749		15400	300	4.18752	2.47712	0.591548		2600	100	3.41497	2	0.585656
	12100	5000	4.08279	3.69897	0.905992		8554	1000	3.93217	3	0.762938		13290	3000	4.12352	3.47712	0.84324
	20000	120000	4.30103	5.07918	1.18092		60850	10000	4.78426	4	0.836075		17811.4	1000	4.2507	3	0.705766
	11500	5000	4.0607	3.69897	0.91092		3000	10000	3.47712	4	1.15038		108420	0	5.03511	0	0
	40000	5000	4.60206	3.69897	0.803764		30000	1000	4.47712	3	0.670073		52000	1000	4.716	3	0.636132
	161000	5000	5.20683	3.69897	0.710408		81000	6000	4.90849	3.77815	0.769718		50000	1000	4.69897	3	0.638438
	24800	5000	4.39445	3.69897	0.841736		90000	2000	4.95424	3.30103	0.666304		23580	30000	4.37254	4.47712	1.02392
	322000	5000	5.50786	3.69897	0.671581		183000	3000	5.26245	3.47712	0.660742		60000	1000	4.77815	3	0.627858
	100000	5000	5	3.69897	0.739794		70000	2000	4.8451	3.30103	0.681313		0	3000	1	3.47712	3.47712
	200000	5000	5.30103	3.69897	0.697783		30000	1000	4.47712	3	0.670073		0	5000	1	3.69897	3.69897
	200000	120000	5.30103	5.07918	0.95815		100000	100	5	2	0.4		50500	30	4.70329	1.47712	0.314061
	80000	5000	4.90309	3.69897	0.754416		20000	3500	4.30103	3.54407	0.824004		27600	3000	4.44091	3.47712	0.782975
	35000	120000	4.54407	5.07918	1.11776		35000	1500	4.54407	3.17609	0.698953		49800	28000	4.69723	4.44716	0.946762
	43450	5000	4.63799	3.69897	0.797537		78950	0	4.89735	0	0		18780	700	4.2737	2.8451	0.665723
	95500	5000	4.98	3.69897	0.742765		38000	5000	4.57978	3.69897	0.807674		103660	3000	5.01561	3.47712	0.69326
	40000	5000	4.60206	3.69897	0.803764		80000	4000	4.90309	3.60206	0.734651		41540	8000	4.61847	3.90309	0.845105
	110000	5000	5.04139	3.69897	0.73372		70000	1000	4.8451	3	0.619183		87170	600	4.94037	2.77815	0.562337
	200000	120000	5.30103	5.07918	0.95815		36000	3500	4.5563	3.54407	0.777839		28160	8000	4.44963	3.90309	0.877171
	73000	5000	4.86332	3.69897	0.760585		10000	5613.27	4	3.74922	0.937304		3200	400	3.50515	2.60206	0.742353
	20000	5000	4.30103	3.69897	0.86002		50000	0	4.69897	0	0		100000	3000	5	3.47712	0.695424
	7200	120000	3.85733	5.07918	1.31676		46200	20000	4.66464	4.30103	0.922049		44200	4000	4.64542	3.60206	0.7754
	60000	120000	4.77815	5.07918	1.063		41000	34000	4.61278	4.53148	0.982374		67100	300	4.82672	2.47712	0.51321
	125200	5000	5.0976	3.69897	0.725629		130000	8000	5.11394	3.90309	0.763225		117160	7000	5.06878	3.8451	0.758585
	258000	5000	5.41162	3.69897	0.683524		100000	20000	5	4.30103	0.860206		0	1500	1	3.17609	3.17609
	37500	5000	4.57403	3.69897	0.808689		190000	2000	5.27875	3.30103	0.625343		0	0	0	0	0
	30000	5000	4.47712	3.69897	0.826194		10000	0	4	0	0		30000	500	4.47712	2.69897	0.602836
	42392	5000	4.62728	3.69897	0.799383		40000	500	4.60206	2.69897	0.58647		30000	800	4.47712	2.90309	0.648428
	68110	5000	4.83321	3.69897	0.765324		80000	500	4.90309	2.69897	0.550463		40000	300	4.60206	2.47712	0.538264
	3000	120000	3.47712	5.07918	1.46074		25000	15000	4.39794	4.17609	0.949556		4400	20000	3.64345	4.30103	1.18048
	45300	5000	4.6561	3.69897	0.794436		50000	300	4.69897	2.47712	0.527163		61700	500	4.79029	2.69897	0.563426
	66200	120000	4.82086	5.07918	1.05358		40000	7000	4.60206	3.8451	0.835517		63100	500	4.80003	2.69897	0.562282
	44800	5000	4.65128	3.69897	0.795259		62400	4000	4.79518	3.60206	0.751183		84700	3000	4.92788	3.47712	0.705601
	35000	120000	4.54407	5.07918	1.11776		20000	1000	4.30103	3	0.697507		24300	4000	4.38561	3.60206	0.821337
	130800	120000	5.11661	5.07918	0.992685		22100	2000	4.34439	3.30103	0.759837		13205	30000	4.12074	4.47712	1.08649
	36000	120000	4.5563	5.07918	1.11476		20000	300	4.30103	2.47712	0.575937		35100	500	4.54531	2.69897	0.593793
	63500	120000	4.80277	5.07918	1.05755		50000	2000	4.69897	3.30103	0.702501		46200	3000	4.66464	3.47712	0.745421
	43600	120000	4.63949	5.07918	1.09477		40000	100	4.60206	2	0.434588		19200	3000	4.2833	3.47712	0.811785
	32000	120000	4.50515	5.07918	1.12742		38600	5000	4.58659	3.69897	0.806475		36200	5000	4.55871	3.69897	0.811407
	3000	120000	3.47712	5.07918	1.46074		6000	4000	3.77815	3.60206	0.953392		6350	5000	3.80277	3.69897	0.972703
	72200	120000	4.85854	5.07918	1.04541		61900	1000	4.79169	3	0.626084		154600	2000	5.18921	3.30103	0.636134
	212500	120000	5.32736	5.07918	0.953414		60000	1000	4.77815	3	0.627858		33100	10000	4.51983	4	0.884989
	50700	120000	4.70501	5.07918	1.07953		80300	2000	4.90472	3.30103	0.673032		71750	20000	4.85582	4.30103	0.885747
	60000	120000	4.77815	5.07918	1.063		66900	2000	4.82543	3.30103	0.684091		176450	140000	5.24662	5.14613	0.980846
	30000	5000	4.47712	3.69897	0.826194		30000	100	4.47712	2	0.446716		15700	10000	4.1959	4	0.953312
	15000	120000	4.17609	5.07918	1.21625		40000	23000	4.60206	4.36173	0.947777		55000	5000	4.74036	3.69897	0.780314
	30000	120000	4.47712	5.07918	1.13447		20000	600	4.30103	2.77815	0.645927		26360	700	4.42095	2.8451	0.64355
	11000	5000	4.04139	3.69897	0.915271		6900	400	3.83885	2.60206	0.677823		7000	2000	3.8451	3.30103	0.858503
	20000	120000	4.30103	5.07918	1.18092		77200	4000	4.88762	3.60206	0.736977		12760	1000	4.10585	3	0.730665
	62800	5000	4.79796	3.69897	0.770946		40000	400	4.60206	2.60206	0.565412		21800	4000	4.33846	3.60206	0.830263
	30000	5000	4.47712	3.69897	0.826194		44300	1000	4.6464	3	0.645661		62764	3000	4.79771	3.47712	0.724746
	88300	120000	4.94596	5.07918	1.02694		16600	20000	4.22011	4.30103	1.01918		500	2000	2.69897	3.30103	1.22307
	8790	120000	3.94399	5.07918	1.28783		5000	1000	3.69897	3	0.811037		17860	1000	4.25188	3	0.70557
	17650	5000	4.24674	3.69897	0.871013		22440	200	4.35102	2.30103	0.528848		21400	300	4.33041	2.47712	0.572029
	20000	5000	4.30103	3.69897	0.86002		30000	3000	4.47712	3.47712	0.776642		41020	30000	4.613	4.47712	0.970545
	40000	120000	4.60206	5.07918	1.10368		30000	10000	4.47712	4	0.893431		10060	10000	4.0026	4	0.999351
	10000	5000	4	3.69897	0.924743		46000	1500	4.66276	3.17609	0.681162		12600	5000	4.10037	3.69897	0.902106
	15000	120000	4.17609	5.07918	1.21625		15000	5000	4.17609	3.69897	0.885749		3300	2400	3.51851	3.38021	0.960693
	80000	5000	4.90309	3.69897	0.754416		284600	5000	5.45423	3.69897	0.678183		44700	3000	4.65031	3.47712	0.747719
	5000	120000	3.69897	5.07918	1.37313		50000	35000	4.69897	4.54407	0.967035		25360	6000	4.40415	3.77815	0.857862
	30000	5000	4.47712	3.69897	0.826194		5000	10000	3.69897	4	1.08138		4860	2000	3.68664	3.30103	0.895404
	4000	120000	3.60206	5.07918	1.41008		4260	200	3.62941	2.30103	0.633996		1920	1000	3.2833	3	0.913715
	40120	120000	4.60336	5.07918	1.10336		20000	1000	4.30103	3	0.697507		12500	1000	4.09691	3	0.732259
	6950	5000	3.84198	3.69897	0.962776		100000	750	5	2.87506	0.575012		50400	5000	4.70243	3.69897	0.786608
	1000	120000	3	5.07918	1.69306		20000	2000	4.30103	3.30103	0.767498		9820	4000	3.99211	3.60206	0.902294
	7000	5000	3.8451	3.69897	0.961996		9300	150	3.96848	2.17609	0.548343		14100	500	4.14922	2.69897	0.650477
	78560	120000	4.8952	5.07918	1.03758		23680	10000	4.37438	4	0.914415		6020	4000	3.7796	3.60206	0.953028
	5000	120000	3.69897	5.07918	1.37313		7000	1000	3.8451	3	0.780214		1520	10000	3.18184	4	1.25713
	3120	5000	3.49415	3.69897	1.05862		3000	1500	3.47712	3.17609	0.913426		960	2000	2.98227	3.30103	1.10688
	5000	120000	3.69897	5.07918	1.37313		24050	1500	4.38112	3.17609	0.72495		11400	2000	4.0569	3.30103	0.813682
	17800	120000	4.25042	5.07918	1.19498		15000	1000	4.17609	3	0.718375		20440	1000	4.31048	3	0.695978
	39200	5000	4.59329	3.69897	0.805299		94140	500	4.97377	2.69897	0.54264		20800	500	4.31806	2.69897	0.625042
	55720	120000	4.74601	5.07918	1.0702		15000	30000	4.17609	4.47712	1.07208		31080	3800	4.49248	3.57978	0.796839
	10800	120000	4.03342	5.07918	1.25927		110000	0	5.04139	0	0		72850	2000	4.86243	3.30103	0.678885
	9000	5000	3.95424	3.69897	0.935443		4390	100	3.64246	2	0.549079		2440	100	3.38739	2	0.590425
	161680	120000	5.20866	5.07918	0.975142		40000	15000	4.60206	4.17609	0.90744		67970	4000	4.83232	3.60206	0.74541
	30000	120000	4.47712	5.07918	1.13447		10150	2000	4.00647	3.30103	0.823926		12200	1500	4.08636	3.17609	0.777242
	34000	5000	4.53148	3.69897	0.816283		46200	1000	4.66464	3	0.643136		25450	100	4.40569	2	0.453959
	30000	5000	4.47712	3.69897	0.826194		18850	15000	4.27531	4.17609	0.976792		37900	2000	4.57864	3.30103	0.720963
	30000	5000	4.47712	3.69897	0.826194		18850	15000	4.27531	4.17609	0.976792		37900	2000	4.57864	3.30103	0.720963
	93750	5000	4.97197	3.69897	0.743964		42170	200	4.625	2.30103	0.49752		42190	2000	4.62521	3.30103	0.713704
	715020	5000	5.85432	3.69897	0.631836		17600	300	4.24551	2.47712	0.583468		73780	2300	4.86794	3.36173	0.690585
	478500	120000	5.67988	5.07918	0.894241		34380	3000	4.53631	3.47712	0.766509		42950	3000	4.63296	3.47712	0.750518
	470382	120000	5.67245	5.07918	0.895412		2035	5700	3.30856	3.75587	1.1352		8950	10000	3.95182	4	1.01219
	698100	120000	5.84392	5.07918	0.86914		57700	800	4.76118	2.90309	0.609742		230040	1500	5.3618	3.17609	0.592355
	48600	120000	4.68664	5.07918	1.08376		12240	800	4.08778	2.90309	0.710187		23150	500	4.36455	2.69897	0.618384
	54400	120000	4.7356	5.07918	1.07255		65000	10000	4.81291	4	0.831097		56070	1000	4.74873	3	0.631748
	142500	5000	5.15381	3.69897	0.717715		31000	600	4.49136	2.77815	0.618554		154720	400	5.18955	2.60206	0.501404
	64000	120000	4.80618	5.07918	1.0568		38000	2000	4.57978	3.30103	0.720783		63995	34000	4.80615	4.53148	0.942851
	96900	120000	4.98632	5.07918	1.01862		38570	400	4.58625	2.60206	0.567361		50630	200	4.70441	2.30103	0.489122
	17080	5000	4.23249	3.69897	0.873947		20000	1000	4.30103	3	0.697507		29000	6000	4.4624	3.77815	0.846664
	30000	5000	4.47712	3.69897	0.826194		22480	15000	4.3518	4.17609	0.959625		15900	2000	4.2014	3.30103	0.785698
	53200	120000	4.72591	5.07918	1.07475		46330	2000	4.66586	3.30103	0.707486		59250	400	4.77269	2.60206	0.545198
	29000	120000	4.4624	5.07918	1.13822		30000	0	4.47712	0	0		50560	500	4.70381	2.69897	0.573784
	13260	5000	4.12254	3.69897	0.897254		34160	4700	4.53352	3.6721	0.809989		48700	7000	4.68753	3.8451	0.820283
	42730	5000	4.63073	3.69897	0.798787		50000	200	4.69897	2.30103	0.489688		72500	0	4.86034	0	0
	22000	5000	4.34242	3.69897	0.851822		15963	600	4.20311	2.77815	0.660974		17495	0	4.24291	0	0
	35000	5000	4.54407	3.69897	0.814022		30000	1200	4.47712	3.07918	0.687759		12000	1000	4.07918	3	0.735442
	39760	120000	4.59945	5.07918	1.1043		5880	10	3.76938	1	0.265296		0	300	1	2.47712	2.47712
	66460	120000	4.82256	5.07918	1.05321		31390	200	4.49679	2.30103	0.511705		12250	500	4.08814	2.69897	0.660196
	33124	120000	4.52014	5.07918	1.12368		29580	200	4.471	2.30103	0.514657		0	100	1	2	2
	40000	120000	4.60206	5.07918	1.10368		41400	4000	4.617	3.60206	0.780173		12500	500	4.09691	2.69897	0.658782
	100000	5000	5	3.69897	0.739794		77900	2000	4.89154	3.30103	0.674845		69000	4000	4.83885	3.60206	0.744404
	10500	5000	4.02119	3.69897	0.91987		8840	220	3.94645	2.34242	0.593552		18440	360	4.26576	2.5563	0.599261
	20000	5000	4.30103	3.69897	0.86002		26830	3000	4.42862	3.47712	0.785148		14730	0	4.1682	0	0
	50000	5000	4.69897	3.69897	0.787187		80000	1000	4.90309	3	0.611859		44200	100	4.64542	2	0.430531
	23000	5000	4.36173	3.69897	0.848052		20000	13000	4.30103	4.11394	0.956502		11840	0	4.07335	0	0
	26400	120000	4.4216	5.07918	1.14872		24000	500	4.38021	2.69897	0.616173		20400	0	4.30963	0	0
	34000	120000	4.53148	5.07918	1.12087		25200	54200	4.4014	4.734	1.07557		14340	200	4.15655	2.30103	0.553591
	8000	5000	3.90309	3.69897	0.947703		25350	300	4.40398	2.47712	0.562474		44500	200	4.64836	2.30103	0.49502
	20000	5000	4.30103	3.69897	0.86002		41460	2000	4.61763	3.30103	0.714875		54000	1000	4.73239	3	0.633929
	4000	5000	3.60206	3.69897	1.0269		8100	2000	3.90849	3.30103	0.84458		840	5000	2.92428	3.69897	1.26492
	12000	120000	4.07918	5.07918	1.24515		13100	6000	4.11727	3.77815	0.917635		5400	1000	3.73239	3	0.803774
	29600	5000	4.47129	3.69897	0.827271		35560	500	4.55096	2.69897	0.593055		23700	100	4.37475	2	0.457169
	44000	120000	4.64345	5.07918	1.09384		40005	15000	4.60211	4.17609	0.907429		40000	35000	4.60206	4.54407	0.987399
	119000	5000	5.07555	3.69897	0.728783		57900	1000	4.76268	3	0.629898		52340	1000	4.71883	3	0.63575
	53730	120000	4.73022	5.07918	1.07377		19520	5000	4.29048	3.69897	0.862134		30970	7000	4.49094	3.8451	0.85619
	5000	120000	3.69897	5.07918	1.37313		8573	700	3.93313	2.8451	0.723367		5320	4400	3.72591	3.64345	0.977869
	15000	5000	4.17609	3.69897	0.885749		68800	17000	4.83759	4.23045	0.874495		11000	500	4.04139	2.69897	0.667832
	44800	5000	4.65128	3.69897	0.795259		30000	500	4.47712	2.69897	0.602836		71000	120	4.85126	2.07918	0.428586
	49650	5000	4.69592	3.69897	0.787699		74600	2000	4.87274	3.30103	0.677449		75000	500	4.87506	2.69897	0.553628
	60000	5000	4.77815	3.69897	0.774143		69600	1000	4.84261	3	0.619501		62400	0	4.79518	0	0
	13200	5000	4.12057	3.69897	0.897683		14000	1500	4.14613	3.17609	0.766038		11200	800	4.04922	2.90309	0.716951
	18700	120000	4.27184	5.07918	1.18899		15400	2000	4.18752	3.30103	0.788302		15400	2000	4.18752	3.30103	0.788302
	26440	5000	4.42226	3.69897	0.836443		5000	0	3.69897	0	0		0	0	0	0	0
	59900	5000	4.77743	3.69897	0.77426		31200	35000	4.49415	4.54407	1.01111		39100	500	4.59218	2.69897	0.587732
	30900	5000	4.48996	3.69897	0.823832		56000	1200	4.74819	3.07918	0.648496		78400	1500	4.89432	3.17609	0.648935
	64800	5000	4.81158	3.69897	0.768765		50000	800	4.69897	2.90309	0.617814		44000	500	4.64345	2.69897	0.581242
	20000	5000	4.30103	3.69897	0.86002		30000	1500	4.47712	3.17609	0.709405		24600	6000	4.39094	3.77815	0.860443
	290000	5000	5.4624	3.69897	0.67717		10000	0	4	0	0		1200	200	3.07918	2.30103	0.747286
	50000	5000	4.69897	3.69897	0.787187		49000	3000	4.6902	3.47712	0.741359		76900	500	4.88593	2.69897	0.552397
	60000	5000	4.77815	3.69897	0.774143		30000	25000	4.47712	4.39794	0.982314		11995	3000	4.079	3.47712	0.852444
	47085	120000	4.67288	5.07918	1.08695		30000	0	4.47712	0	0		54400	0	4.7356	0	0
	20000	5000	4.30103	3.69897	0.86002		70000	0	4.8451	0	0		40300	0	4.60531	0	0
	70000	5000	4.8451	3.69897	0.763446		44000	500	4.64345	2.69897	0.581242		25000	0	4.39794	0	0
	23300	5000	4.36736	3.69897	0.846959		12300	1000	4.08991	3	0.733513		0	0	0	0	0
	50000	5000	4.69897	3.69897	0.787187		31500	500	4.49831	2.69897	0.599996		31600	600	4.49969	2.77815	0.61741
	56300	5000	4.75051	3.69897	0.778647		30000	500	4.47712	2.69897	0.602836		48110	500	4.68224	2.69897	0.576428
	2500	5000	3.39794	3.69897	1.08859		2000	0	3.30103	0	0		2150	0	3.33244	0	0
	10000	5000	4	3.69897	0.924743		8600	3000	3.9345	3.47712	0.883752		6000	2000	3.77815	3.30103	0.873716
	89000	5000	4.94939	3.69897	0.747359		81900	2000	4.91328	3.30103	0.671858		67600	10000	4.82995	4	0.828166
	108540	5000	5.03559	3.69897	0.734565		50000	0	4.69897	0	0		23500	0	4.37107	0	0
	59800	5000	4.7767	3.69897	0.774378		27000	2000	4.43136	3.30103	0.744924		27000	500	4.43136	2.69897	0.609061
	135000	120000	5.13033	5.07918	0.990029		30090	80000	4.47842	4.90309	1.09483		10000	100000	4	5	1.25
	43000	5000	4.63347	3.69897	0.798316		36000	2000	4.5563	3.30103	0.724498		30000	4000	4.47712	3.60206	0.804548
	79200	120000	4.89873	5.07918	1.03684		100000	300000	5	5.47712	1.09542		240500	200	5.38112	2.30103	0.427612
	92130	120000	4.9644	5.07918	1.02312		60000	800	4.77815	2.90309	0.607576		83450	2300	4.92143	3.36173	0.68308
	92130	120000	4.9644	5.07918	1.02312		60000	800	4.77815	2.90309	0.607576		83450	2300	4.92143	3.36173	0.68308
	70000	5000	4.8451	3.69897	0.763446		80000	10000	4.90309	4	0.815812		91000	7000	4.95904	3.8451	0.775371
	62900	120000	4.79865	5.07918	1.05846		17770	5000	4.24969	3.69897	0.87041		35910	3000	4.55522	3.47712	0.763328
	37000	5000	4.5682	3.69897	0.809721		25000	7000	4.39794	3.8451	0.874295		24000	4000	4.38021	3.60206	0.822348
	40000	120000	4.60206	5.07918	1.10368		55000	18000	4.74036	4.25527	0.897668		63650	10000	4.8038	4	0.832674
	100000	5000	5	3.69897	0.739794		80000	500	4.90309	2.69897	0.550463		64400	300	4.80889	2.47712	0.515113
	10000	5000	4	3.69897	0.924743		13000	600	4.11394	2.77815	0.675301		10000	1000	4	3	0.75
	84550	120000	4.92711	5.07918	1.03086		76300	20000	4.88252	4.30103	0.880903		122800	1000	5.0892	3	0.589484
	53850	120000	4.73119	5.07918	1.07355		51240	2000	4.70961	3.30103	0.700914		41500	10000	4.61805	4	0.866167
	53850	120000	4.73119	5.07918	1.07355		51240	2000	4.70961	3.30103	0.700914		41500	10000	4.61805	4	0.866167
	71665	5000	4.85531	3.69897	0.761841		32400	0	4.51055	0	0		31100	400	4.49276	2.60206	0.579167
	40000	120000	4.60206	5.07918	1.10368		3000	3000	3.47712	3.47712	1		31700	600	4.50106	2.77815	0.617222
	20000	5000	4.30103	3.69897	0.86002		27220	1000	4.43489	3	0.676454		21100	500	4.32428	2.69897	0.624143
	71800	5000	4.85612	3.69897	0.761712		40000	3000	4.60206	3.47712	0.755558		58000	500	4.76343	2.69897	0.566602
	183270	5000	5.26309	3.69897	0.702813		35000	800	4.54407	2.90309	0.638875		26120	40000	4.41697	4.60206	1.0419
	183270	5000	5.26309	3.69897	0.702813		35000	800	4.54407	2.90309	0.638875		26120	40000	4.41697	4.60206	1.0419
	19230	5000	4.28398	3.69897	0.863443		51000	3000	4.70757	3.47712	0.738623		64850	2000	4.81191	3.30103	0.686012
	60000	5000	4.77815	3.69897	0.774143		116520	10000	5.0664	4	0.789515		72900	13000	4.86273	4.11394	0.846016
	60000	5000	4.77815	3.69897	0.774143		116520	10000	5.0664	4	0.789515		72900	13000	4.86273	4.11394	0.846016
	31000	5000	4.49136	3.69897	0.823574		93700	200	4.97174	2.30103	0.462822		55000	3000	4.74036	3.47712	0.733514
	99540	120000	4.998	5.07918	1.01624		51740	0	4.71383	0	0		77980	400	4.89198	2.60206	0.531903
	15712	5000	4.19623	3.69897	0.881498		27000	17000	4.43136	4.23045	0.954661		7110	3000	3.85187	3.47712	0.90271
	10000	120000	4	5.07918	1.2698		10950	1500	4.03941	3.17609	0.786275		93400	30000	4.97035	4.47712	0.900766
	19000	120000	4.27875	5.07918	1.18707		39698	5000	4.59877	3.69897	0.804339		21710	1500	4.33666	3.17609	0.732382
	10000	120000	4	5.07918	1.2698		52370	200	4.71908	2.30103	0.487601		61500	100	4.78888	2	0.417635
	74000	120000	4.86923	5.07918	1.04312		27800	17000	4.44404	4.23045	0.951937		31320	1000	4.49582	3	0.667286
	100000	5000	5	3.69897	0.739794		35000	8000	4.54407	3.90309	0.858942		46000	5000	4.66276	3.69897	0.793301
	50000	5000	4.69897	3.69897	0.787187		35000	4000	4.54407	3.60206	0.792695		35000	10000	4.54407	4	0.880269
	68000	5000	4.83251	3.69897	0.765435		90000	1000	4.95424	3	0.605542		533100	2000	5.72681	3.30103	0.576417
	23880	5000	4.37803	3.69897	0.844893		3820	100	3.58206	2	0.558337		10300	500	4.01284	2.69897	0.672584
	60000	5000	4.77815	3.69897	0.774143		40000	200	4.60206	2.30103	0.5		59250	300	4.77269	2.47712	0.51902
	60000	5000	4.77815	3.69897	0.774143		40000	200	4.60206	2.30103	0.5		59250	300	4.77269	2.47712	0.51902
	108040	120000	5.03358	5.07918	1.00906		62750	1000	4.79761	3	0.625311		55160	1000	4.74162	3	0.632695
	80000	5000	4.90309	3.69897	0.754416		74200	0	4.8704	0	0		54000	500	4.73239	2.69897	0.570318
	39000	5000	4.59106	3.69897	0.805689		30000	22000	4.47712	4.34242	0.969914		1600	2000	3.20412	3.30103	1.03025
	80000	120000	4.90309	5.07918	1.03591		50000	5000	4.69897	3.69897	0.787187		66300	500	4.82151	2.69897	0.559777
	5000	120000	3.69897	5.07918	1.37313		18500	500	4.26717	2.69897	0.632496		68160	500	4.83353	2.69897	0.558385
	20000	120000	4.30103	5.07918	1.18092		20000	6000	4.30103	3.77815	0.878429		40260	14000	4.60487	4.14613	0.900378
	40000	120000	4.60206	5.07918	1.10368		40000	0	4.60206	0	0		55480	500	4.74414	2.69897	0.568906
	40000	5000	4.60206	3.69897	0.803764		30000	2000	4.47712	3.30103	0.737311		29590	2000	4.47114	3.30103	0.738296
	27300	5000	4.43616	3.69897	0.833822		23400	1600	4.36922	3.20412	0.73334		16900	1500	4.22789	3.17609	0.751224
	41000	120000	4.61278	5.07918	1.10111		45000	17000	4.65321	4.23045	0.909146		39200	45000	4.59329	4.65321	1.01305
	72500	5000	4.86034	3.69897	0.761052		113380	2000	5.05454	3.30103	0.653083		39500	5000	4.5966	3.69897	0.804719
	381000	120000	5.58092	5.07918	0.910097		216500	0	5.33546	0	0		28500	0	4.45484	0	0
	70000	5000	4.8451	3.69897	0.763446		95670	30000	4.98078	4.47712	0.89888		50000	6000	4.69897	3.77815	0.804038
	2470	5000	3.3927	3.69897	1.09027		6600	5000	3.81954	3.69897	0.968432		6000	2000	3.77815	3.30103	0.873716
	70000	5000	4.8451	3.69897	0.763446		35850	5000	4.55449	3.69897	0.812159		20000	7000	4.30103	3.8451	0.893995
	4425	5000	3.64591	3.69897	1.01455		5800	4000	3.76343	3.60206	0.957122		0	5000	1	3.69897	3.69897
	61300	5000	4.78746	3.69897	0.772637		60000	100	4.77815	2	0.418572		57000	300	4.75587	2.47712	0.520855
	85910	5000	4.93404	3.69897	0.749683		125080	0	5.09719	0	0		30481	2000	4.48403	3.30103	0.736175
	16440	5000	4.2159	3.69897	0.877385		13280	18000	4.1232	4.25527	1.03203		1320	6000	3.12057	3.77815	1.21072
	2000	5000	3.30103	3.69897	1.12055		2400	0	3.38021	0	0		4100	500	3.61278	2.69897	0.747061
	36160	5000	4.55823	3.69897	0.811493		45010	0	4.65331	0	0		17320	2600	4.23855	3.41497	0.805694
	18000	5000	4.25527	3.69897	0.869267		20000	2000	4.30103	3.30103	0.767498		75635	1000	4.87872	3	0.614915
	90000	5000	4.95424	3.69897	0.746627		81000	200	4.90849	2.30103	0.468786		82670	100	4.91735	2	0.406723
	102500	120000	5.01072	5.07918	1.01366		67020	500	4.8262	2.69897	0.559232		58100	300	4.76418	2.47712	0.519947
	59970	5000	4.77793	3.69897	0.774178		70000	1000	4.8451	3	0.619183		58120	200	4.76433	2.30103	0.482971
	20100	5000	4.3032	3.69897	0.859587		6904	2900	3.8391	3.4624	0.901877		1320	3000	3.12057	3.47712	1.11426
	46500	5000	4.66745	3.69897	0.792503		52325	0	4.71871	0	0		49420	300	4.6939	2.47712	0.527732
	90000	5000	4.95424	3.69897	0.746627		120000	20000	5.07918	4.30103	0.846796		164036	14000	5.21494	4.14613	0.795048
	204530	5000	5.31076	3.69897	0.696505		60000	500	4.77815	2.69897	0.564857		162800	1000	5.21165	3	0.575633
	61000	5000	4.78533	3.69897	0.772981		62300	1000	4.79449	3	0.625719		60400	300	4.78104	2.47712	0.518114
	20965	5000	4.32149	3.69897	0.855947		31500	303	4.49831	2.48144	0.551639		65090	400	4.81351	2.60206	0.540574
	71200	120000	4.85248	5.07918	1.04672		70010	1000	4.84516	3	0.619175		50000	200	4.69897	2.30103	0.489688
	70000	120000	4.8451	5.07918	1.04831		150000	300	5.17609	2.47712	0.47857		78700	0	4.89597	0	0
	30000	5000	4.47712	3.69897	0.826194		60000	5000	4.77815	3.69897	0.774143		89920	3000	4.95386	3.47712	0.701902
	10000	120000	4	5.07918	1.2698		30000	6000	4.47712	3.77815	0.84388		21000	3000	4.32222	3.47712	0.804476
	30000	5000	4.47712	3.69897	0.826194		71000	3600	4.85126	3.5563	0.733068		3600	0	3.5563	0	0
	20000	5000	4.30103	3.69897	0.86002		30000	0	4.47712	0	0		6000	50	3.77815	1.69897	0.449683
	101000	5000	5.00432	3.69897	0.739155		111800	2000	5.04844	3.30103	0.653871		109800	2000	5.0406	3.30103	0.654888
	42700	120000	4.63043	5.07918	1.09691		30000	3000	4.47712	3.47712	0.776642		600	27000	2.77815	4.43136	1.59508
	60000	5000	4.77815	3.69897	0.774143		94630	700	4.97603	2.8451	0.571761		11000	1000	4.04139	3	0.742318
	20000	5000	4.30103	3.69897	0.86002		30000	0	4.47712	0	0		35860	3000	4.55461	3.47712	0.763429
	31760	120000	4.50188	5.07918	1.12824		50000	6000	4.69897	3.77815	0.804038		15450	10000	4.18893	4	0.954898
	31760	120000	4.50188	5.07918	1.12824		50000	6000	4.69897	3.77815	0.804038		15450	10000	4.18893	4	0.954898
	43100	120000	4.63448	5.07918	1.09596		40000	4000	4.60206	3.60206	0.782706		65900	1500	4.81889	3.17609	0.659093
	88700	120000	4.94792	5.07918	1.02653		83000	0	4.91908	0	0		57060	0	4.75633	0	0
	3800	5000	3.57978	3.69897	1.03329		10000	2000	4	3.30103	0.825257		14960	1700	4.17493	3.23045	0.773773
	20000	120000	4.30103	5.07918	1.18092		120000	2000	5.07918	3.30103	0.649914		207410	1000	5.31683	3	0.564246
	20000	5000	4.30103	3.69897	0.86002		30000	1000	4.47712	3	0.670073		50000	1000	4.69897	3	0.638438
	20000	120000	4.30103	5.07918	1.18092		39200	2000	4.59329	3.30103	0.718664		7330	4000	3.8651	3.60206	0.931944
	48400	120000	4.68485	5.07918	1.08417		26000	500	4.41497	2.69897	0.611322		28500	1000	4.45484	3	0.673424
	25000	120000	4.39794	5.07918	1.1549		31750	1000	4.50174	3	0.666408		22810	400	4.35813	2.60206	0.597059
	25000	120000	4.39794	5.07918	1.1549		31750	1000	4.50174	3	0.666408		22810	400	4.35813	2.60206	0.597059
	72001	120000	4.85734	5.07918	1.04567		58400	4000	4.76641	3.60206	0.755717		21000	5000	4.32222	3.69897	0.855803
	30000	120000	4.47712	5.07918	1.13447		30000	0	4.47712	0	0		37500	200	4.57403	2.30103	0.503064
	30000	5000	4.47712	3.69897	0.826194		39220	3000	4.59351	3.47712	0.756964		36105	500	4.55757	2.69897	0.592195
	61200	5000	4.78675	3.69897	0.772752		30000	2000	4.47712	3.30103	0.737311		13700	2000	4.13672	3.30103	0.797982
	100000	120000	5	5.07918	1.01584		70000	0	4.8451	0	0		13205	0	4.12074	0	0
	20000	5000	4.30103	3.69897	0.86002		20000	0	4.30103	0	0		7150	0	3.85431	0	0
	20000	5000	4.30103	3.69897	0.86002		100000	0	5	0	0		222900	150	5.34811	2.17609	0.40689
	20000	120000	4.30103	5.07918	1.18092		15000	300	4.17609	2.47712	0.593167		29205	5000	4.46546	3.69897	0.828352
	134300	120000	5.12808	5.07918	0.990465		100000	0	5	0	0		28909	500	4.46103	2.69897	0.60501
	120000	120000	5.07918	5.07918	1		56900	10000	4.75511	4	0.8412		65950	0	4.81921	0	0
	70000	120000	4.8451	5.07918	1.04831		100000	300	5	2.47712	0.495424		61650	10000	4.78993	4	0.835085
	11400	120000	4.0569	5.07918	1.25198		24155	1500	4.38301	3.17609	0.724637		53000	0	4.72428	0	0
	32950	5000	4.51786	3.69897	0.818745		20000	1200	4.30103	3.07918	0.715917		500	1000	2.69897	3	1.11154
	73950	5000	4.86894	3.69897	0.759708		35500	2000	4.55023	3.30103	0.725465		20800	5000	4.31806	3.69897	0.856627
	46100	120000	4.6637	5.07918	1.08909		47880	200	4.68015	2.30103	0.491657		29800	0	4.47422	0	0
	100000	5000	5	3.69897	0.739794		90000	300	4.95424	2.47712	0.5		74200	200	4.8704	2.30103	0.472452
	10000	5000	4	3.69897	0.924743		20000	1500	4.30103	3.17609	0.738449		23150	3500	4.36455	3.54407	0.812012
	20000	5000	4.30103	3.69897	0.86002		21040	6000	4.32305	3.77815	0.873956		20600	3000	4.31387	3.47712	0.806033
	54000	5000	4.73239	3.69897	0.781628		5000	0	3.69897	0	0		6530	3000	3.81491	3.47712	0.911455
	15000	120000	4.17609	5.07918	1.21625		5000	2000	3.69897	3.30103	0.892419		19700	1500	4.29447	3.17609	0.739578
	20000	5000	4.30103	3.69897	0.86002		20000	0	4.30103	0	0		19150	0	4.28217	0	0
	20000	5000	4.30103	3.69897	0.86002		25000	2000	4.39794	3.30103	0.750585		46900	5000	4.67117	3.69897	0.791872
	20000	5000	4.30103	3.69897	0.86002		25000	2000	4.39794	3.30103	0.750585		46900	5000	4.67117	3.69897	0.791872
	25100	5000	4.39967	3.69897	0.840737		6400	200	3.80618	2.30103	0.604551		6050	200	3.78176	2.30103	0.608456
	37000	5000	4.5682	3.69897	0.809721		74000	1000	4.86923	3	0.616114		50000	1000	4.69897	3	0.638438
	25000	120000	4.39794	5.07918	1.1549		15000	5000	4.17609	3.69897	0.885749		19200	2500	4.2833	3.39794	0.793299
	107926	120000	5.03313	5.07918	1.00915		70000	2000	4.8451	3.30103	0.681313		46500	500	4.66745	2.69897	0.578253
	20000	5000	4.30103	3.69897	0.86002		20000	5000	4.30103	3.69897	0.86002		25250	0	4.40226	0	0
	50000	5000	4.69897	3.69897	0.787187		90000	5000	4.95424	3.69897	0.746627		0	0	0	0	0
	10000	120000	4	5.07918	1.2698		10000	1300	4	3.11394	0.778486		9400	40000	3.97313	4.60206	1.1583
	20000	120000	4.30103	5.07918	1.18092		40000	500	4.60206	2.69897	0.58647		65930	600	4.81908	2.77815	0.57649
	3790	120000	3.57864	5.07918	1.41931		2500	150	3.39794	2.17609	0.640415		1700	7000	3.23045	3.8451	1.19027
	126000	120000	5.10037	5.07918	0.995846		72000	3000	4.85733	3.47712	0.71585		96000	1200	4.98227	3.07918	0.618028
	96650	5000	4.9852	3.69897	0.74199		40000	500	4.60206	2.69897	0.58647		10000	0	4	0	0
	10000	5000	4	3.69897	0.924743		6300	15000	3.79934	4.17609	1.09916		0	3700	1	3.5682	3.5682
	79000	5000	4.89763	3.69897	0.755258		50000	10000	4.69897	4	0.85125		40000	0	4.60206	0	0
	5000	5000	3.69897	3.69897	1		5000	3000	3.69897	3.47712	0.940024		500	4000	2.69897	3.60206	1.33461
	60000	5000	4.77815	3.69897	0.774143		60800	50000	4.7839	4.69897	0.982246		50000	500	4.69897	2.69897	0.574375
	38400	5000	4.58433	3.69897	0.806872		20000	500	4.30103	2.69897	0.627517		14800	500	4.17026	2.69897	0.647194
	100000	120000	5	5.07918	1.01584		500200	2760	5.69914	3.44091	0.603759		4000	6000	3.60206	3.77815	1.04889
	110000	120000	5.04139	5.07918	1.0075		40000	4000	4.60206	3.60206	0.782706		52000	3000	4.716	3.47712	0.737303
	40000	120000	4.60206	5.07918	1.10368		70000	100	4.8451	2	0.412788		62600	1500	4.79657	3.17609	0.662158
	30000	120000	4.47712	5.07918	1.13447		30000	0	4.47712	0	0		5000	3000	3.69897	3.47712	0.940024
	500	5000	2.69897	3.69897	1.37051		1200	1200	3.07918	3.07918	1		1960	5000	3.29226	3.69897	1.12354
	110400	120000	5.04297	5.07918	1.00718		98400	3000	4.993	3.47712	0.6964		62805	50000	4.79799	4.69897	0.979361
	92300	120000	4.9652	5.07918	1.02296		82475	5000	4.91632	3.69897	0.752386		4650	6000	3.66745	3.77815	1.03018
	0	120000	1	5.07918	5.07918		30000	4000	4.47712	3.60206	0.804548		3700	6000	3.5682	3.77815	1.05884
	12590	5000	4.10003	3.69897	0.902182		10000	3000	4	3.47712	0.86928		48000	1000	4.68124	3	0.640856
	50000	120000	4.69897	5.07918	1.08091		16500	1000	4.21748	3	0.711325		25200	8000	4.4014	3.90309	0.886784
	72000	5000	4.85733	3.69897	0.761523		32000	2000	4.50515	3.30103	0.732724		32000	300	4.50515	2.47712	0.549842
	2000	120000	3.30103	5.07918	1.53867		15000	15000	4.17609	4.17609	1		5600	6500	3.74819	3.81291	1.01727
	50500	120000	4.70329	5.07918	1.07992		69000	2000	4.83885	3.30103	0.682193		50500	2000	4.70329	3.30103	0.701855
	90000	5000	4.95424	3.69897	0.746627		80000	500	4.90309	2.69897	0.550463		84000	500	4.92428	2.69897	0.548094
	30000	120000	4.47712	5.07918	1.13447		30000	5000	4.47712	3.69897	0.826194		35200	0	4.54654	0	0
	50000	5000	4.69897	3.69897	0.787187		30000	0	4.47712	0	0		34900	0	4.54283	0	0
	10000	5000	4	3.69897	0.924743		7000	0	3.8451	0	0		5800	0	3.76343	0	0
	130000	5000	5.11394	3.69897	0.723311		80000	100	4.90309	2	0.407906		30000	300	4.47712	2.47712	0.553284
	50000	120000	4.69897	5.07918	1.08091		9900	2000	3.99564	3.30103	0.826159		12500	2000	4.09691	3.30103	0.805737
	3020	5000	3.48001	3.69897	1.06292		3000	2700	3.47712	3.43136	0.98684		9700	650	3.98677	2.81291	0.705562
	30000	5000	4.47712	3.69897	0.826194		26600	1000	4.42488	3	0.677984		40600	400	4.60853	2.60206	0.564619
	30500	5000	4.4843	3.69897	0.824871		1020	520	3.0086	2.716	0.902747		31500	20000	4.49831	4.30103	0.956143
	15000	5000	4.17609	3.69897	0.885749		5000	0	3.69897	0	0		10960	200	4.03981	2.30103	0.569589
	13828	5000	4.14076	3.69897	0.893307		31000	2000	4.49136	3.30103	0.734973		56950	5000	4.75549	3.69897	0.777831
	20000	5000	4.30103	3.69897	0.86002		10000	1000	4	3	0.75		42400	1000	4.62737	3	0.648317
	30000	120000	4.47712	5.07918	1.13447		43000	1000	4.63347	3	0.647463		7500	2000	3.87506	3.30103	0.851865
	1170	120000	3.06819	5.07918	1.65543		2000	100	3.30103	2	0.605872		22700	1000	4.35603	3	0.688701
	20000	5000	4.30103	3.69897	0.86002		65620	3000	4.81704	3.47712	0.721838		18250	2000	4.26126	3.30103	0.77466
	6000	5000	3.77815	3.69897	0.979042		26720	7000	4.42684	3.8451	0.868588		20800	2000	4.31806	3.30103	0.76447
	23000	120000	4.36173	5.07918	1.16449		26800	1000	4.42813	3	0.677486		33100	300	4.51983	2.47712	0.548057
	50000	5000	4.69897	3.69897	0.787187		51000	1000	4.70757	3	0.637271		53800	800	4.73078	2.90309	0.61366
	30000	5000	4.47712	3.69897	0.826194		50000	1300	4.69897	3.11394	0.662686		48230	200	4.68332	2.30103	0.491325
	15000	5000	4.17609	3.69897	0.885749		6000	1500	3.77815	3.17609	0.840647		72500	13000	4.86034	4.11394	0.846432
	20000	5000	4.30103	3.69897	0.86002		23400	1000	4.36922	3	0.686622		32400	1000	4.51055	3	0.665108
	53700	120000	4.72997	5.07918	1.07383		35000	1000	4.54407	3	0.660201		69255.3	1300	4.84045	3.11394	0.643316
	30000	120000	4.47712	5.07918	1.13447		20000	500	4.30103	2.69897	0.627517		20000	500	4.30103	2.69897	0.627517
	30000	5000	4.47712	3.69897	0.826194		32400	6000	4.51055	3.77815	0.837626		45360	500	4.65667	2.69897	0.579592
	20000	5000	4.30103	3.69897	0.86002		20000	300	4.30103	2.47712	0.575937		39500	0	4.5966	0	0
	20500	120000	4.31175	5.07918	1.17798		21300	600	4.32838	2.77815	0.641846		53300	1000	4.72673	3	0.634689
	50000	5000	4.69897	3.69897	0.787187		20000	3000	4.30103	3.47712	0.808439		15800	2000	4.19866	3.30103	0.786211
	57000	5000	4.75587	3.69897	0.777769		62800	0	4.79796	0	0		32800	4000	4.51587	3.60206	0.797644
	6020	120000	3.7796	5.07918	1.34384		50000	10000	4.69897	4	0.85125		25800	20000	4.41162	4.30103	0.974932
	15000	120000	4.17609	5.07918	1.21625		30000	2000	4.47712	3.30103	0.737311		14300	500	4.15534	2.69897	0.649519
	22000	5000	4.34242	3.69897	0.851822		23000	300	4.36173	2.47712	0.567922		14200	40000	4.15229	4.60206	1.10832
	32860	120000	4.51667	5.07918	1.12454		10000	8000	4	3.90309	0.975772		41387	5000	4.61686	3.69897	0.801187
	9700	120000	3.98677	5.07918	1.27401		10000	2000	4	3.30103	0.825257		0	200	1	2.30103	2.30103
	770	5000	2.88649	3.69897	1.28148		678	15000	2.83123	4.17609	1.47501		10000	50000	4	4.69897	1.17474
	28500	120000	4.45484	5.07918	1.14015		32000	5000	4.50515	3.69897	0.821054		1500	100	3.17609	2	0.629705
	30000	120000	4.47712	5.07918	1.13447		45800	2000	4.66087	3.30103	0.708244		2500	1000	3.39794	3	0.882888
	30000	120000	4.47712	5.07918	1.13447		45800	2000	4.66087	3.30103	0.708244		2500	1000	3.39794	3	0.882888
	30000	120000	4.47712	5.07918	1.13447		45800	2000	4.66087	3.30103	0.708244		2500	1000	3.39794	3	0.882888
	15000	5000	4.17609	3.69897	0.885749		132960	15000	5.12372	4.17609	0.81505		0	14000	1	4.14613	4.14613
	30000	5000	4.47712	3.69897	0.826194		15000	500	4.17609	2.69897	0.646291		13800	500	4.13988	2.69897	0.651944
	20000	5000	4.30103	3.69897	0.86002		10000	5000	4	3.69897	0.924743		3500	500	3.54407	2.69897	0.761546
	70000	120000	4.8451	5.07918	1.04831		21500	1200	4.33244	3.07918	0.710727		43630	0	4.63979	0	0
	70000	120000	4.8451	5.07918	1.04831		21500	1200	4.33244	3.07918	0.710727		43630	0	4.63979	0	0
	6000	120000	3.77815	5.07918	1.34436		20740	0	4.31681	0	0		10100	500	4.00432	2.69897	0.674014
	7000	5000	3.8451	3.69897	0.961996		11000	15000	4.04139	4.17609	1.03333		22600	8000	4.35411	3.90309	0.896415
	1600	5000	3.20412	3.69897	1.15444		10000	7000	4	3.8451	0.961275		46850	20000	4.67071	4.30103	0.920852
	11000	5000	4.04139	3.69897	0.915271		10000	1000	4	3	0.75		1200	500	3.07918	2.69897	0.876522
	12000	5000	4.07918	3.69897	0.906792		31300	3000	4.49554	3.47712	0.773459		24000	1000	4.38021	3	0.684898
	87291	5000	4.94097	3.69897	0.748632		90000	2000	4.95424	3.30103	0.666304		92440	3000	4.96586	3.47712	0.700205
	20980	5000	4.32181	3.69897	0.855885		3620	3000	3.55871	3.47712	0.977074		42000	0	4.62325	0	0
	35000	120000	4.54407	5.07918	1.11776		47780	2000	4.67925	3.30103	0.705462		24220	5000	4.38417	3.69897	0.84371
	28000	120000	4.44716	5.07918	1.14212		20000	5000	4.30103	3.69897	0.86002		18980	2000	4.2783	3.30103	0.771576
	60120	120000	4.77902	5.07918	1.06281		80100	3000	4.90363	3.47712	0.709091		37665	3000	4.57594	3.47712	0.759871
	54900	5000	4.73957	3.69897	0.780444		61260	3000	4.78718	3.47712	0.726341		45600	0	4.65896	0	0
	8480	120000	3.9284	5.07918	1.29294		13480	70000	4.12969	4.8451	1.17324		11680	4000	4.06744	3.60206	0.885583
	150000	5000	5.17609	3.69897	0.714626		112200	0	5.04999	0	0		63500	2000	4.80277	3.30103	0.687317
	21000	120000	4.32222	5.07918	1.17513		30000	5000	4.47712	3.69897	0.826194		35140	4500	4.5458	3.65321	0.803645
	50750	5000	4.70544	3.69897	0.786106		16300	1000	4.21219	3	0.712219		65280	4000	4.81478	3.60206	0.748126
	45000	5000	4.65321	3.69897	0.794928		63600	1250	4.80346	3.09691	0.644725		43180	3000	4.63528	3.47712	0.750142
	7520	120000	3.87622	5.07918	1.31034		3470	1500	3.54033	3.17609	0.897117		8380	800	3.92324	2.90309	0.739972
	35000	120000	4.54407	5.07918	1.11776		41000	3000	4.61278	3.47712	0.753801		36860	2000	4.56656	3.30103	0.722871
	50000	5000	4.69897	3.69897	0.787187		34500	0	4.53782	0	0		49000	2000	4.6902	3.30103	0.703815
	50000	5000	4.69897	3.69897	0.787187		34500	0	4.53782	0	0		49000	2000	4.6902	3.30103	0.703815
	12000	5000	4.07918	3.69897	0.906792		20000	2000	4.30103	3.30103	0.767498		9250	600	3.96614	2.77815	0.700467
	17000	5000	4.23045	3.69897	0.874368		14200	300	4.15229	2.47712	0.596568		16980	500	4.22994	2.69897	0.638064
	40900	120000	4.61172	5.07918	1.10136		30000	5000	4.47712	3.69897	0.826194		22300	200	4.3483	2.30103	0.529179
	10000	120000	4	5.07918	1.2698		10100	3000	4.00432	3.47712	0.868342		18190	3000	4.25983	3.47712	0.816258
	81000	5000	4.90849	3.69897	0.753587		100000	500	5	2.69897	0.539794		76500	0	4.88366	0	0
	7680	5000	3.88536	3.69897	0.952027		5500	12500	3.74036	4.09691	1.09532		102840	300	5.01216	2.47712	0.494222
	40000	5000	4.60206	3.69897	0.803764		51900	5000	4.71517	3.69897	0.784483		181600	15000	5.25912	4.17609	0.794067
	30000	5000	4.47712	3.69897	0.826194		40000	5000	4.60206	3.69897	0.803764		33700	10000	4.52763	4	0.883464
	33620	5000	4.5266	3.69897	0.817163		14000	0	4.14613	0	0		226000	500	5.35411	2.69897	0.504093
	45600	120000	4.65896	5.07918	1.0902		20560	3000	4.31302	3.47712	0.806191		40800	2000	4.61066	3.30103	0.715956
	50000	120000	4.69897	5.07918	1.08091		100000	300	5	2.47712	0.495424		20000	1000	4.30103	3	0.697507
	44000	5000	4.64345	3.69897	0.796599		20000	10000	4.30103	4	0.93001		37700	1000	4.57634	3	0.655546
	60000	5000	4.77815	3.69897	0.774143		51800	6000	4.71433	3.77815	0.801419		27700	300	4.44248	2.47712	0.557599
	16000	5000	4.20412	3.69897	0.879844		39000	2000	4.59106	3.30103	0.719012		76800	1000	4.88536	3	0.614079
	60000	5000	4.77815	3.69897	0.774143		143600	1000	5.15715	3	0.581716		74000	0	4.86923	0	0
	7000	5000	3.8451	3.69897	0.961996		5000	5000	3.69897	3.69897	1		8680	2000	3.93852	3.30103	0.83814
	70000	5000	4.8451	3.69897	0.763446		100000	500	5	2.69897	0.539794		30000	10	4.47712	1	0.223358
	40000	5000	4.60206	3.69897	0.803764		31800	1000	4.50243	3	0.666307		88580	1000	4.94734	3	0.606387
	70000	5000	4.8451	3.69897	0.763446		121200	10000	5.0835	4	0.786859		70700	1000	4.84942	3	0.618631
	10000	5000	4	3.69897	0.924743		16000	7000	4.20412	3.8451	0.914602		29100	10000	4.46389	4	0.896079
	37000	5000	4.5682	3.69897	0.809721		21800	10000	4.33846	4	0.921987		35000	300	4.54407	2.47712	0.545133
	27000	5000	4.43136	3.69897	0.834725		20000	11000	4.30103	4.04139	0.939634		29500	0	4.46982	0	0
	50000	5000	4.69897	3.69897	0.787187		50000	2000	4.69897	3.30103	0.702501		35000	1000	4.54407	3	0.660201
	6680	5000	3.82478	3.69897	0.967108		10000	1000	4	3	0.75		11180	6000	4.04844	3.77815	0.933236
	50000	5000	4.69897	3.69897	0.787187		26800	0	4.42813	0	0		9680	1000	3.98588	3	0.752658
	70000	5000	4.8451	3.69897	0.763446		70000	500	4.8451	2.69897	0.557052		26000	0	4.41497	0	0
	144100	120000	5.15866	5.07918	0.984592		25000	4000	4.39794	3.60206	0.819033		11300	10000	4.05308	4	0.986904
	12000	5000	4.07918	3.69897	0.906792		33200	5000	4.52114	3.69897	0.81815		11800	1000	4.07188	3	0.73676
	30000	5000	4.47712	3.69897	0.826194		30000	100	4.47712	2	0.446716		55200	300	4.74194	2.47712	0.522386
	44500	5000	4.64836	3.69897	0.795758		38000	100	4.57978	2	0.436702		45600	0	4.65896	0	0
	28000	5000	4.44716	3.69897	0.83176		20000	2000	4.30103	3.30103	0.767498		93640	1000	4.97146	3	0.603444
	120000	5000	5.07918	3.69897	0.728261		120000	500	5.07918	2.69897	0.531379		73000	1000	4.86332	3	0.616862
	45100	120000	4.65418	5.07918	1.09132		56700	20000	4.75358	4.30103	0.904797		65000	2000	4.81291	3.30103	0.685869
	70000	5000	4.8451	3.69897	0.763446		37500	4000	4.57403	3.60206	0.787502		72000	1000	4.85733	3	0.617623
	12000	5000	4.07918	3.69897	0.906792		20000	3000	4.30103	3.47712	0.808439		19600	3500	4.29226	3.54407	0.825689
	20000	5000	4.30103	3.69897	0.86002		15000	100	4.17609	2	0.478917		2620	1000	3.4183	3	0.877629
	7000	120000	3.8451	5.07918	1.32095		3200	0	3.50515	0	0		10500	500	4.02119	2.69897	0.671187
	6000	120000	3.77815	5.07918	1.34436		6100	5613.27	3.78533	3.74922	0.99046		5660	10000	3.75282	4	1.06587
	18000	5000	4.25527	3.69897	0.869267		0	30000	1	4.47712	4.47712		11800	2000	4.07188	3.30103	0.810689
	5000	120000	3.69897	5.07918	1.37313		2000	1200	3.30103	3.07918	0.932794		4520	1000	3.65514	3	0.820762
	38440	120000	4.58478	5.07918	1.10783		94510	5613.27	4.97548	3.74922	0.753539		16820	600	4.22583	2.77815	0.657422
	100000	5000	5	3.69897	0.739794		75000	5613.27	4.87506	3.74922	0.76906		81300	500	4.91009	2.69897	0.549678
	34200	5000	4.53403	3.69897	0.815825		30000	0	4.47712	0	0		56200	300	4.74974	2.47712	0.521528
	33950	120000	4.53084	5.07918	1.12102		34620	300	4.53933	2.47712	0.545702		46500	1000	4.66745	3	0.642749
	30000	5000	4.47712	3.69897	0.826194		30000	300	4.47712	2.47712	0.553284		0	4859.94	1	3.68663	3.68663
	44000	120000	4.64345	5.07918	1.09384		32500	7000	4.51188	3.8451	0.852216		24660	1000	4.39199	3	0.683061
	16800	120000	4.22531	5.07918	1.20209		19100	5000	4.28103	3.69897	0.864037		15000	2000	4.17609	3.30103	0.790459
	19400	5000	4.2878	3.69897	0.862673		6600	100	3.81954	2	0.523623		102430	500	5.01043	2.69897	0.538671
	19400	5000	4.2878	3.69897	0.862673		6600	100	3.81954	2	0.523623		102430	500	5.01043	2.69897	0.538671
	10000	5000	4	3.69897	0.924743		5000	200	3.69897	2.30103	0.622073		53600	300	4.72916	2.47712	0.523797
	23000	5000	4.36173	3.69897	0.848052		72200	500	4.85854	2.69897	0.555511		82820	500	4.91814	2.69897	0.548779
	23000	5000	4.36173	3.69897	0.848052		72200	500	4.85854	2.69897	0.555511		82820	500	4.91814	2.69897	0.548779
	151440	5000	5.18024	3.69897	0.714054		60000	0	4.77815	0	0		41300	0	4.61595	0	0
	3240	5000	3.51055	3.69897	1.05367		10000	1000	4	3	0.75		22200	2000	4.34635	3.30103	0.759494
	0	120000	1	5.07918	5.07918		2500	2000	3.39794	3.30103	0.97148		27163	600	4.43398	2.77815	0.62656
	20000	120000	4.30103	5.07918	1.18092		17620	10000	4.24601	4	0.942062		5260	6000	3.72099	3.77815	1.01536
	10000	5000	4	3.69897	0.924743		6000	3000	3.77815	3.47712	0.920323		10500	4000	4.02119	3.60206	0.89577
	28800	120000	4.45939	5.07918	1.13899		10600	3000	4.02531	3.47712	0.863815		49274	1500	4.69262	3.17609	0.676827
	0	120000	1	5.07918	5.07918		3000	50000	3.47712	4.69897	1.3514		22240	2000	4.34713	3.30103	0.759358
	0	120000	1	5.07918	5.07918		10000	500	4	2.69897	0.674743		27500	10000	4.43933	4	0.901036
	50000	120000	4.69897	5.07918	1.08091		60000	2000	4.77815	3.30103	0.690859		31180	1000	4.49388	3	0.667575
	10000	120000	4	5.07918	1.2698		30000	3000	4.47712	3.47712	0.776642		6500	5000	3.81291	3.69897	0.970116
	50000	120000	4.69897	5.07918	1.08091		50000	500	4.69897	2.69897	0.574375		1320	200	3.12057	2.30103	0.737374
	10000	120000	4	5.07918	1.2698		15000	500	4.17609	2.69897	0.646291		20000	500	4.30103	2.69897	0.627517
	60000	5000	4.77815	3.69897	0.774143		40000	0	4.60206	0	0		30500	0	4.4843	0	0
	900	5000	2.95424	3.69897	1.25209		6650	20000	3.82282	4.30103	1.12509		8870	2000	3.94792	3.30103	0.836143
	5100	120000	3.70757	5.07918	1.36995		30000	0	4.47712	0	0		21260	0	4.32756	0	0
	40000	120000	4.60206	5.07918	1.10368		35000	1200	4.54407	3.07918	0.677627		57900	1000	4.76268	3	0.629898
	24000	120000	4.38021	5.07918	1.15957		23000	20000	4.36173	4.30103	0.986084		17300	30000	4.23805	4.47712	1.05641
	10000	120000	4	5.07918	1.2698		10000	18000	4	4.25527	1.06382		2300	0	3.36173	0	0
	51400	5000	4.71096	3.69897	0.785183		21410	0	4.33062	0	0		137550	15000	5.13846	4.17609	0.812713
	22000	5000	4.34242	3.69897	0.851822		15000	500	4.17609	2.69897	0.646291		35100	500	4.54531	2.69897	0.593793
	30750	5000	4.48785	3.69897	0.82422		1400	1000	3.14613	3	0.953553		41080	1000	4.61363	3	0.650247
	50000	120000	4.69897	5.07918	1.08091		20000	5000	4.30103	3.69897	0.86002		8000	3000	3.90309	3.47712	0.890864
	20000	5000	4.30103	3.69897	0.86002		30000	0	4.47712	0	0		29600	4000	4.47129	3.60206	0.805597
	20000	120000	4.30103	5.07918	1.18092		24000	1000	4.38021	3	0.684898		59800	100	4.7767	2	0.418699
	30000	5000	4.47712	3.69897	0.826194		15000	1000	4.17609	3	0.718375		27000	500	4.43136	2.69897	0.609061
	30000	5000	4.47712	3.69897	0.826194		61100	1000	4.78604	3	0.626823		26800	1000	4.42813	3	0.677486
	30000	5000	4.47712	3.69897	0.826194		61100	1000	4.78604	3	0.626823		26800	1000	4.42813	3	0.677486
	7100	5000	3.85126	3.69897	0.960458		5000	1000	3.69897	3	0.811037		41100	40000	4.61384	4.60206	0.997446
	134020	5000	5.12717	3.69897	0.721445		100000	500	5	2.69897	0.539794		54900	12000	4.73957	4.07918	0.860664
	9000	5000	3.95424	3.69897	0.935443		1100	5000	3.04139	3.69897	1.21621		8350	3000	3.92169	3.47712	0.886639
	5600	120000	3.74819	5.07918	1.3551		11000	1800	4.04139	3.25527	0.805483		13700	4000	4.13672	3.60206	0.870753
	200000	5000	5.30103	3.69897	0.697783		20000	15000	4.30103	4.17609	0.970951		73000	2000	4.86332	3.30103	0.67876
	25000	5000	4.39794	3.69897	0.841069		60000	40000	4.77815	4.60206	0.963147		33500	7000	4.52504	3.8451	0.849737
	37500	5000	4.57403	3.69897	0.808689		55350	5000	4.74312	3.69897	0.77986		41300	600	4.61595	2.77815	0.601859
	100000	5000	5	3.69897	0.739794		128000	0	5.10721	0	0		84900	1000	4.92891	3	0.608654
	50000	120000	4.69897	5.07918	1.08091		50000	0	4.69897	0	0		72800	500	4.86213	2.69897	0.5551
	70000	120000	4.8451	5.07918	1.04831		36000	4000	4.5563	3.60206	0.790566		146720	3000	5.16649	3.47712	0.673014
	12000	5000	4.07918	3.69897	0.906792		28000	20000	4.44716	4.30103	0.967141		17000	13000	4.23045	4.11394	0.97246
	20000	120000	4.30103	5.07918	1.18092		130000	0	5.11394	0	0		39500	1000	4.5966	3	0.652657
	12560	120000	4.09899	5.07918	1.23913		7960	10000	3.90091	4	1.0254		35850	1000	4.55449	3	0.658691
	5000	5000	3.69897	3.69897	1		37200	400	4.57054	2.60206	0.569311		8300	2200	3.91908	3.34242	0.852859
	21400	120000	4.33041	5.07918	1.17291		7560	5000	3.87852	3.69897	0.953706		15000	2000	4.17609	3.30103	0.790459
	20000	5000	4.30103	3.69897	0.86002		48120	0	4.68233	0	0		72200	2500	4.85854	3.39794	0.699375
	15000	5000	4.17609	3.69897	0.885749		40000	1000	4.60206	3	0.651882		37500	1000	4.57403	3	0.655877
	102000	5000	5.0086	3.69897	0.738524		89009	0	4.94943	0	0		65000	1000	4.81291	3	0.623323
	20000	5000	4.30103	3.69897	0.86002		23605	8000	4.373	3.90309	0.892542		49000	5000	4.6902	3.69897	0.78866
	20000	120000	4.30103	5.07918	1.18092		42000	1000	4.62325	3	0.648894		43900	4000	4.64246	3.60206	0.775894
	24000	120000	4.38021	5.07918	1.15957		35000	3000	4.54407	3.47712	0.7652		24780	2000	4.3941	3.30103	0.751241
	50000	5000	4.69897	3.69897	0.787187		49000	2000	4.6902	3.30103	0.703815		30000	300	4.47712	2.47712	0.553284
	5640	5000	3.75128	3.69897	0.986056		9240	1700	3.96567	3.23045	0.814603		0	2500	1	3.39794	3.39794
	55000	120000	4.74036	5.07918	1.07148		43000	0	4.63347	0	0		30490	0	4.48416	0	0
	40000	5000	4.60206	3.69897	0.803764		25000	7000	4.39794	3.8451	0.874295		25400	40000	4.40483	4.60206	1.04477
	56000	120000	4.74819	5.07918	1.06971		30000	0	4.47712	0	0		30380	1000	4.48259	3	0.669256
	75000	5000	4.87506	3.69897	0.758754		50520	3000	4.70346	3.47712	0.739268		48000	0	4.68124	0	0
	42000	5000	4.62325	3.69897	0.80008		20005	400	4.30114	2.60206	0.60497		46000	460	4.66276	2.66276	0.571069
	117000	5000	5.06819	3.69897	0.729841		21000	3000	4.32222	3.47712	0.804476		0	0	0	0	0
	88000	5000	4.94448	3.69897	0.748101		74300	0	4.87099	0	0		29600	30000	4.47129	4.47712	1.0013
	13000	5000	4.11394	3.69897	0.89913		12500	300	4.09691	2.47712	0.604632		10390	4000	4.01662	3.60206	0.89679
	50000	120000	4.69897	5.07918	1.08091		50000	3000	4.69897	3.47712	0.739975		35970	2000	4.55594	3.30103	0.724555
	7000	5000	3.8451	3.69897	0.961996		8500	3000	3.92942	3.47712	0.884895		1520	500	3.18184	2.69897	0.848241
	25000	120000	4.39794	5.07918	1.1549		41600	300	4.61909	2.47712	0.536279		35000	0	4.54407	0	0
	33000	120000	4.51851	5.07918	1.12408		21000	1000	4.32222	3	0.694088		170300	8000	5.23121	3.90309	0.746115
	40000	5000	4.60206	3.69897	0.803764		40000	1000	4.60206	3	0.651882		73900	5000	4.86864	3.69897	0.759754
	60000	120000	4.77815	5.07918	1.063		30000	0	4.47712	0	0		131200	1000	5.11793	3	0.586174
	50000	5000	4.69897	3.69897	0.787187		21620	0	4.33486	0	0		25000	0	4.39794	0	0
	25000	5000	4.39794	3.69897	0.841069		6320	25000	3.80072	4.39794	1.15713		26800	500	4.42813	2.69897	0.609505
	30000	5000	4.47712	3.69897	0.826194		25000	4000	4.39794	3.60206	0.819033		71060	0	4.85163	0	0
	80000	5000	4.90309	3.69897	0.754416		50000	35000	4.69897	4.54407	0.967035		128900	1000	5.11025	3	0.587055
	16000	5000	4.20412	3.69897	0.879844		16000	200	4.20412	2.30103	0.547327		24080	0	4.38166	0	0
	47650	5000	4.67806	3.69897	0.790705		27400	300	4.43775	2.47712	0.558193		130000	500	5.11394	2.69897	0.527767
	47650	5000	4.67806	3.69897	0.790705		27400	300	4.43775	2.47712	0.558193		130000	500	5.11394	2.69897	0.527767
	73000	5000	4.86332	3.69897	0.760585		35000	500	4.54407	2.69897	0.593955		19000	1000	4.27875	3	0.701139
	71020	5000	4.85138	3.69897	0.762457		50000	1000	4.69897	3	0.638438		71000	2000	4.85126	3.30103	0.680448
	50500	5000	4.70329	3.69897	0.786464		20600	500	4.31387	2.69897	0.62565		43400	500	4.63749	2.69897	0.581989
	20200	5000	4.30535	3.69897	0.859156		40000	500	4.60206	2.69897	0.58647		47000	100	4.6721	2	0.428073
	42800	5000	4.63144	3.69897	0.798665		33880	500	4.52994	2.69897	0.595807		26800	2000	4.42813	3.30103	0.745467
	50000	5000	4.69897	3.69897	0.787187		40000	300	4.60206	2.47712	0.538264		17500	1000	4.24304	3	0.707041
	30000	5000	4.47712	3.69897	0.826194		40000	0	4.60206	0	0		52700	500	4.72181	2.69897	0.571596
	43500	120000	4.63849	5.07918	1.09501		28000	2000	4.44716	3.30103	0.742279		47000	3000	4.6721	3.47712	0.744231
	45000	120000	4.65321	5.07918	1.09154		70000	500	4.8451	2.69897	0.557052		0	0	0	0	0
	40000	120000	4.60206	5.07918	1.10368		38700	5000	4.58771	3.69897	0.806278		46800	800	4.67025	2.90309	0.621614
	40000	120000	4.60206	5.07918	1.10368		38700	5000	4.58771	3.69897	0.806278		46800	800	4.67025	2.90309	0.621614
	8985	5000	3.95352	3.69897	0.935615		10000	10000	4	4	1		6880	1000	3.83759	3	0.781741
	47800	120000	4.67943	5.07918	1.08543		32900	2000	4.5172	3.30103	0.73077		45250	2000	4.65562	3.30103	0.709042
	90400	5000	4.95617	3.69897	0.746337		33500	1000	4.52504	3	0.662977		26000	1000	4.41497	3	0.679506
	52000	5000	4.716	3.69897	0.784344		62160	500	4.79351	2.69897	0.563047		91700	300	4.96237	2.47712	0.499181
	60000	5000	4.77815	3.69897	0.774143		60000	3000	4.77815	3.47712	0.727713		103100	1000	5.01326	3	0.598413
	69200	5000	4.84011	3.69897	0.764233		30000	500	4.47712	2.69897	0.602836		18800	20	4.27416	1.30103	0.304394
	60000	5000	4.77815	3.69897	0.774143		40000	0	4.60206	0	0		13000	0	4.11394	0	0
	109000	120000	5.03743	5.07918	1.00829		100000	2000	5	3.30103	0.660206		42000	4000	4.62325	3.60206	0.779119
	70000	120000	4.8451	5.07918	1.04831		15000	1000	4.17609	3	0.718375		68350	500	4.83474	2.69897	0.558245
	94500	120000	4.97543	5.07918	1.02085		124400	4000	5.09482	3.60206	0.707004		79500	30000	4.90037	4.47712	0.91363
	80000	5000	4.90309	3.69897	0.754416		76600	3000	4.88423	3.47712	0.711908		82900	6000	4.91855	3.77815	0.768143
	60000	5000	4.77815	3.69897	0.774143		115700	500	5.06333	2.69897	0.533042		48000	1000	4.68124	3	0.640856
	138100	5000	5.14019	3.69897	0.719617		95000	5000	4.97772	3.69897	0.743105		57000	5000	4.75587	3.69897	0.777769
	10000	120000	4	5.07918	1.2698		80000	4000	4.90309	3.60206	0.734651		45200	3000	4.65514	3.47712	0.746943
	25000	120000	4.39794	5.07918	1.1549		100000	30000	5	4.47712	0.895424		102000	1000	5.0086	3	0.59897
	12300	120000	4.08991	5.07918	1.24188		28620	7000	4.45667	3.8451	0.862774		25800	4000	4.41162	3.60206	0.816494
	30000	120000	4.47712	5.07918	1.13447		37555	20000	4.57467	4.30103	0.940184		92400	5000	4.96567	3.69897	0.744908
	70000	120000	4.8451	5.07918	1.04831		81400	2000	4.91062	3.30103	0.672222		54800	1000	4.73878	3	0.633074
	40000	120000	4.60206	5.07918	1.10368		30300	5000	4.48144	3.69897	0.825397		95740	3000	4.98109	3.47712	0.698064
	35000	5000	4.54407	3.69897	0.814022		30000	1000	4.47712	3	0.670073		73600	2000	4.86688	3.30103	0.678264
	29100	5000	4.46389	3.69897	0.828642		32500	6000	4.51188	3.77815	0.837378		32000	3000	4.50515	3.47712	0.77181
	36400	5000	4.5611	3.69897	0.810982		30030	2000	4.47756	3.30103	0.737239		36400	3000	4.5611	3.47712	0.762342
	25000	120000	4.39794	5.07918	1.1549		24900	500	4.3962	2.69897	0.613933		34500	5000	4.53782	3.69897	0.815143
	50000	5000	4.69897	3.69897	0.787187		77000	3000	4.88649	3.47712	0.711578		97000	4000	4.98677	3.60206	0.722323
	10000	5000	4	3.69897	0.924743		4240	500	3.62737	2.69897	0.744058		6040	2000	3.78104	3.30103	0.873049
	30000	5000	4.47712	3.69897	0.826194		20000	500	4.30103	2.69897	0.627517		33840	0	4.52943	0	0
	33040	5000	4.51904	3.69897	0.81853		34000	0	4.53148	0	0		20000	30000	4.30103	4.47712	1.04094
	60240	5000	4.77988	3.69897	0.773862		26200	100	4.4183	2	0.452663		500	50	2.69897	1.69897	0.629488
	80780	5000	4.9073	3.69897	0.753768		33200	2000	4.52114	3.30103	0.730133		71400	1000	4.8537	3	0.618085
	30000	5000	4.47712	3.69897	0.826194		50000	500	4.69897	2.69897	0.574375		16000	1000	4.20412	3	0.713586
	90000	5000	4.95424	3.69897	0.746627		200000	5000	5.30103	3.69897	0.697783		26010	2000	4.41514	3.30103	0.747661
	5000	5000	3.69897	3.69897	1		7360	3000	3.86688	3.47712	0.899206		6600	500	3.81954	2.69897	0.706621
	50000	120000	4.69897	5.07918	1.08091		53000	8000	4.72428	3.90309	0.826177		6800	0	3.83251	0	0
	30000	5000	4.47712	3.69897	0.826194		13000	0	4.11394	0	0		27000	300	4.43136	2.47712	0.558997
	78480	5000	4.89476	3.69897	0.7557		45900	3600	4.66181	3.5563	0.762858		46000	2000	4.66276	3.30103	0.707957
	35000	5000	4.54407	3.69897	0.814022		17300	12000	4.23805	4.07918	0.962515		14000	5000	4.14613	3.69897	0.89215
	7600	5000	3.88081	3.69897	0.953143		7800	3000	3.89209	3.47712	0.89338		500	2000	2.69897	3.30103	1.22307
	53580	120000	4.729	5.07918	1.07405		15000	100000	4.17609	5	1.19729		27600	100000	4.44091	5	1.1259
	41600	120000	4.61909	5.07918	1.09961		31000	20000	4.49136	4.30103	0.957623		16200	5000	4.20952	3.69897	0.878716
	8480	5000	3.9284	3.69897	0.941598		9680	5000	3.98588	3.69897	0.928019		7740	2000	3.88874	3.30103	0.848869
	30000	5000	4.47712	3.69897	0.826194		37500	1000	4.57403	3	0.655877		45000	4000	4.65321	3.60206	0.774102
	50000	120000	4.69897	5.07918	1.08091		5200	200	3.716	2.30103	0.619222		40700	100	4.60959	2	0.433878
	30000	5000	4.47712	3.69897	0.826194		5000	1000	3.69897	3	0.811037		30000	0	4.47712	0	0
	40000	5000	4.60206	3.69897	0.803764		37000	500	4.5682	2.69897	0.590817		51400	500	4.71096	2.69897	0.572913
	30000	5000	4.47712	3.69897	0.826194		21200	16000	4.32634	4.20412	0.971751		9000	0	3.95424	0	0
	105940	5000	5.02506	3.69897	0.736105		53000	1000	4.72428	3	0.635018		62000	1000	4.79239	3	0.625992
	11270	5000	4.05192	3.69897	0.912892		28800	0	4.45939	0	0		2400	30	3.38021	1.47712	0.436991
	40000	120000	4.60206	5.07918	1.10368		10000	15000	4	4.17609	1.04402		14000	8000	4.14613	3.90309	0.941382
	5080	5000	3.70586	3.69897	0.99814		12400	1500	4.09342	3.17609	0.775901		14000	1000	4.14613	3	0.723567
	131000	120000	5.11727	5.07918	0.992557		150000	2000	5.17609	3.30103	0.637746		100000	400	5	2.60206	0.520412
	32070	120000	4.5061	5.07918	1.12718		10060	2000	4.0026	3.30103	0.824722		54800	3000	4.73878	3.47712	0.733759
	20000	5000	4.30103	3.69897	0.86002		8000	360	3.90309	2.5563	0.654943		1330	900	3.12385	2.95424	0.945705
	40000	5000	4.60206	3.69897	0.803764		39600	300	4.5977	2.47712	0.538775		0	3000	1	3.47712	3.47712
	142140	120000	5.15272	5.07918	0.985729		161000	2000	5.20683	3.30103	0.633981		111800	2000	5.04844	3.30103	0.653871
	140000	5000	5.14613	3.69897	0.718787		100000	5000	5	3.69897	0.739794		65120	28000	4.81371	4.44716	0.923852
	40600	5000	4.60853	3.69897	0.802636		40000	100	4.60206	2	0.434588		10010	20	4.00043	1.30103	0.325222
	11460	120000	4.05918	5.07918	1.25128		26600	30000	4.42488	4.47712	1.01181		57160	2000	4.75709	3.30103	0.693918
	78900	120000	4.89708	5.07918	1.03719		58710	2000	4.76871	3.30103	0.692227		15400	800	4.18752	2.90309	0.693272
	70280	120000	4.84683	5.07918	1.04794		46680	1800	4.66913	3.25527	0.69719		36500	4000	4.56229	3.60206	0.789528
	20000	5000	4.30103	3.69897	0.86002		26000	1000	4.41497	3	0.679506		6400	500	3.80618	2.69897	0.709102
	10000	120000	4	5.07918	1.2698		20000	3000	4.30103	3.47712	0.808439		1100	2000	3.04139	3.30103	1.08537
	15000	120000	4.17609	5.07918	1.21625		37905	2000	4.5787	3.30103	0.720954		6300	30000	3.79934	4.47712	1.17839
	62960	120000	4.79906	5.07918	1.05837		10700	3000	4.02938	3.47712	0.862941		17212	4000	4.23583	3.60206	0.850379
	33200	120000	4.52114	5.07918	1.12343		31896	2000	4.50374	3.30103	0.732954		6785	600	3.83155	2.77815	0.725072
	4000	120000	3.60206	5.07918	1.41008		4700	600	3.6721	2.77815	0.756557		36155.3	4000	4.55817	3.60206	0.790242
	7400	120000	3.86923	5.07918	1.31271		6200	43000	3.79239	4.63347	1.22178		5450	3000	3.7364	3.47712	0.930608
	20000	120000	4.30103	5.07918	1.18092		80000	2000	4.90309	3.30103	0.673255		4900	2000	3.6902	3.30103	0.894541
	20000	120000	4.30103	5.07918	1.18092		80000	2000	4.90309	3.30103	0.673255		4900	2000	3.6902	3.30103	0.894541
	3000	120000	3.47712	5.07918	1.46074		14820	10000	4.17085	4	0.959038		15300	3000	4.18469	3.47712	0.830915
	15000	5000	4.17609	3.69897	0.885749		12500	1000	4.09691	3	0.732259		16000	1000	4.20412	3	0.713586
	21000	120000	4.32222	5.07918	1.17513		17000	500	4.23045	2.69897	0.637987		4000	3000	3.60206	3.47712	0.965315
	15000	5000	4.17609	3.69897	0.885749		15000	1000	4.17609	3	0.718375		6500	6000	3.81291	3.77815	0.990883
	4000	5000	3.60206	3.69897	1.0269		47000	4000	4.6721	3.60206	0.770973		43450	3000	4.63799	3.47712	0.749704
	4000	5000	3.60206	3.69897	1.0269		47000	4000	4.6721	3.60206	0.770973		43450	3000	4.63799	3.47712	0.749704
	10800	120000	4.03342	5.07918	1.25927		12150	5000	4.08458	3.69897	0.905595		25400	0	4.40483	0	0
	4400	5000	3.64345	3.69897	1.01524		4200	200	3.62325	2.30103	0.635074		4000	220	3.60206	2.34242	0.650301
	40000	120000	4.60206	5.07918	1.10368		62000	1000	4.79239	3	0.625992		47800	2000	4.67943	3.30103	0.705435
	68550	5000	4.83601	3.69897	0.764881		50000	0	4.69897	0	0		443505	0	5.6469	0	0
	68550	5000	4.83601	3.69897	0.764881		50000	0	4.69897	0	0		443505	0	5.6469	0	0
	48000	5000	4.68124	3.69897	0.790169		60000	30000	4.77815	4.47712	0.936999		25900	15000	4.4133	4.17609	0.946251
	140000	5000	5.14613	3.69897	0.718787		30000	2000	4.47712	3.30103	0.737311		25470	800	4.40603	2.90309	0.65889
	5000	5000	3.69897	3.69897	1		3700	8000	3.5682	3.90309	1.09385		4650	10000	3.66745	4	1.09068
	20000	120000	4.30103	5.07918	1.18092		43000	10000	4.63347	4	0.863284		9700	3000	3.98677	3.47712	0.872165
	20000	120000	4.30103	5.07918	1.18092		43000	10000	4.63347	4	0.863284		9700	3000	3.98677	3.47712	0.872165
	50000	5000	4.69897	3.69897	0.787187		61300	5000	4.78746	3.69897	0.772637		59100	3000	4.77159	3.47712	0.728714
	50000	5000	4.69897	3.69897	0.787187		41000	800	4.61278	2.90309	0.629357		11460	4000	4.05918	3.60206	0.887385
	68500	5000	4.83569	3.69897	0.764931		52845	2000	4.723	3.30103	0.698926		0	500	1	2.69897	2.69897
	68500	5000	4.83569	3.69897	0.764931		52845	2000	4.723	3.30103	0.698926		0	500	1	2.69897	2.69897
	30000	120000	4.47712	5.07918	1.13447		40000	0	4.60206	0	0		27050	3000	4.43217	3.47712	0.784519
	30000	120000	4.47712	5.07918	1.13447		40000	0	4.60206	0	0		27050	3000	4.43217	3.47712	0.784519
	10000	120000	4	5.07918	1.2698		17000	400	4.23045	2.60206	0.615079		13000	1000	4.11394	3	0.729227
	10000	120000	4	5.07918	1.2698		17000	400	4.23045	2.60206	0.615079		13000	1000	4.11394	3	0.729227
	60000	120000	4.77815	5.07918	1.063		36900	1000	4.56703	3	0.656883		7500	600	3.87506	2.77815	0.716931
	24000	5000	4.38021	3.69897	0.844473		10400	2400	4.01703	3.38021	0.84147		12100	4000	4.08279	3.60206	0.882256
	4000	120000	3.60206	5.07918	1.41008		5520	2000	3.74194	3.30103	0.882171		2200	80	3.34242	1.90309	0.569374
	40700	120000	4.60959	5.07918	1.10187		4200	5613.27	3.62325	3.74922	1.03477		8820	30000	3.94547	4.47712	1.13475
	8200	5000	3.91381	3.69897	0.945106		30260	2600	4.48087	3.41497	0.762123		22000	5000	4.34242	3.69897	0.851822
	13000	5000	4.11394	3.69897	0.89913		15535	2600	4.19131	3.41497	0.814774		13200	4000	4.12057	3.60206	0.874165
	42500	120000	4.62839	5.07918	1.0974		20400	200	4.30963	2.30103	0.533927		12150	500	4.08458	2.69897	0.660771
	55000	120000	4.74036	5.07918	1.07148		52000	5000	4.716	3.69897	0.784344		58100	3000	4.76418	3.47712	0.729847
	43660	120000	4.64008	5.07918	1.09463		30000	3000	4.47712	3.47712	0.776642		24300	500	4.38561	2.69897	0.615415
	43660	120000	4.64008	5.07918	1.09463		30000	3000	4.47712	3.47712	0.776642		24300	500	4.38561	2.69897	0.615415
	20000	5000	4.30103	3.69897	0.86002		30000	500	4.47712	2.69897	0.602836		36451	2000	4.56171	3.30103	0.723639
	50000	5000	4.69897	3.69897	0.787187		97200	500	4.98767	2.69897	0.541129		34750	0	4.54095	0	0
	30000	120000	4.47712	5.07918	1.13447		50000	1000	4.69897	3	0.638438		19300	300	4.28556	2.47712	0.578016
	24000	120000	4.38021	5.07918	1.15957		20000	500	4.30103	2.69897	0.627517		16400	1200	4.21484	3.07918	0.730556
	30000	120000	4.47712	5.07918	1.13447		70000	600	4.8451	2.77815	0.573394		15800	1000	4.19866	3	0.714514
	20500	120000	4.31175	5.07918	1.17798		36500	0	4.56229	0	0		59600	0	4.77525	0	0
	30000	5000	4.47712	3.69897	0.826194		30000	3600	4.47712	3.5563	0.794328		29700	0	4.47276	0	0
	30000	5000	4.47712	3.69897	0.826194		30000	3600	4.47712	3.5563	0.794328		29700	0	4.47276	0	0
	20000	120000	4.30103	5.07918	1.18092		40000	1000	4.60206	3	0.651882		16160	5000	4.20844	3.69897	0.878941
	20000	120000	4.30103	5.07918	1.18092		40000	1000	4.60206	3	0.651882		16160	5000	4.20844	3.69897	0.878941
	50000	120000	4.69897	5.07918	1.08091		20000	3000	4.30103	3.47712	0.808439		54257	300	4.73446	2.47712	0.523211
	24000	5000	4.38021	3.69897	0.844473		20000	1000	4.30103	3	0.697507		60000	0	4.77815	0	0
	24000	5000	4.38021	3.69897	0.844473		20000	1000	4.30103	3	0.697507		60000	0	4.77815	0	0
	16000	5000	4.20412	3.69897	0.879844		59400	10000	4.77379	4	0.837909		0	600	1	2.77815	2.77815
	2000	5000	3.30103	3.69897	1.12055		57120	5000	4.75679	3.69897	0.777619		46978	3000	4.67189	3.47712	0.744264
	35000	120000	4.54407	5.07918	1.11776		30000	7000	4.47712	3.8451	0.858833		36700	1000	4.56467	3	0.657222
	50000	120000	4.69897	5.07918	1.08091		95640	15000	4.98064	4.17609	0.838465		0	10000	1	4	4
	50000	120000	4.69897	5.07918	1.08091		95640	15000	4.98064	4.17609	0.838465		0	10000	1	4	4
	50000	120000	4.69897	5.07918	1.08091		40000	2000	4.60206	3.30103	0.717294		102000	240	5.0086	2.38021	0.475225
	45000	120000	4.65321	5.07918	1.09154		35700	3000	4.55267	3.47712	0.763755		10700	2300	4.02938	3.36173	0.834303
	32000	120000	4.50515	5.07918	1.12742		20000	4000	4.30103	3.60206	0.837488		60000	2000	4.77815	3.30103	0.690859
	32000	120000	4.50515	5.07918	1.12742		20000	4000	4.30103	3.60206	0.837488		60000	2000	4.77815	3.30103	0.690859
	20000	120000	4.30103	5.07918	1.18092		70000	2000	4.8451	3.30103	0.681313		33200	2000	4.52114	3.30103	0.730133
	10000	5000	4	3.69897	0.924743		15000	2000	4.17609	3.30103	0.790459		1400	5000	3.14613	3.69897	1.17572
	35000	5000	4.54407	3.69897	0.814022		20000	15000	4.30103	4.17609	0.970951		13560	30000	4.13226	4.47712	1.08346
	16000	5000	4.20412	3.69897	0.879844		20000	7000	4.30103	3.8451	0.893995		5500	2000	3.74036	3.30103	0.882543
	25000	5000	4.39794	3.69897	0.841069		50000	500	4.69897	2.69897	0.574375		20900	500	4.32015	2.69897	0.62474
	32400	5000	4.51055	3.69897	0.820072		50000	300	4.69897	2.47712	0.527163		51600	0	4.71265	0	0
	96000	5000	4.98227	3.69897	0.742426		59405	1600	4.77382	3.20412	0.671185		40000	2000	4.60206	3.30103	0.717294
	33000	5000	4.51851	3.69897	0.818625		27000	2000	4.43136	3.30103	0.744924		24400	5000	4.38739	3.69897	0.843091
	80000	5000	4.90309	3.69897	0.754416		76200	0	4.88195	0	0		26700	0	4.42651	0	0
	80000	5000	4.90309	3.69897	0.754416		76200	0	4.88195	0	0		26700	0	4.42651	0	0
	4000	120000	3.60206	5.07918	1.41008		2640	6000	3.4216	3.77815	1.1042		1820	500	3.26007	2.69897	0.827887
	195600	5000	5.29137	3.69897	0.699057		50000	1000	4.69897	3	0.638438		109800	30000	5.0406	4.47712	0.888212
	20000	5000	4.30103	3.69897	0.86002		15000	250	4.17609	2.39794	0.574207		20800	260	4.31806	2.41497	0.559272
	50010	120000	4.69906	5.07918	1.08089		37500	2000	4.57403	3.30103	0.721689		176410	5000	5.24652	3.69897	0.705033
	100000	120000	5	5.07918	1.01584		50000	800	4.69897	2.90309	0.617814		0	5000	1	3.69897	3.69897
	50000	5000	4.69897	3.69897	0.787187		90000	2000	4.95424	3.30103	0.666304		31000	3000	4.49136	3.47712	0.77418
	85000	120000	4.92942	5.07918	1.03038		40000	4000	4.60206	3.60206	0.782706		60300	4000	4.78032	3.60206	0.753519
	85000	120000	4.92942	5.07918	1.03038		40000	4000	4.60206	3.60206	0.782706		60300	4000	4.78032	3.60206	0.753519
	74300	5000	4.87099	3.69897	0.759388		40000	2000	4.60206	3.30103	0.717294		32180	2000	4.50759	3.30103	0.732328
	19000	120000	4.27875	5.07918	1.18707		20000	2000	4.30103	3.30103	0.767498		5000	10000	3.69897	4	1.08138
	10000	120000	4	5.07918	1.2698		18000	2000	4.25527	3.30103	0.775751		11900	5000	4.07555	3.69897	0.907601
	20000	120000	4.30103	5.07918	1.18092		48220	0	4.68323	0	0		6100	300	3.78533	2.47712	0.6544
	54640	120000	4.73751	5.07918	1.07212		58880	2400	4.76997	3.38021	0.708644		72900	13000	4.86273	4.11394	0.846016
	60000	5000	4.77815	3.69897	0.774143		30000	200	4.47712	2.30103	0.513953		17000	7000	4.23045	3.8451	0.90891
	50000	5000	4.69897	3.69897	0.787187		70000	8000	4.8451	3.90309	0.805575		60500	500	4.78176	2.69897	0.564431
	50000	5000	4.69897	3.69897	0.787187		70000	8000	4.8451	3.90309	0.805575		60500	500	4.78176	2.69897	0.564431
	35000	5000	4.54407	3.69897	0.814022		30000	1000	4.47712	3	0.670073		42000	3000	4.62325	3.47712	0.752095
	35000	5000	4.54407	3.69897	0.814022		30000	1000	4.47712	3	0.670073		42000	3000	4.62325	3.47712	0.752095
	0	5000	1	3.69897	3.69897		3105	3400	3.49206	3.53148	1.01129		2370	320	3.37475	2.50515	0.742322
	21000	120000	4.32222	5.07918	1.17513		40000	500	4.60206	2.69897	0.58647		29192	500	4.46526	2.69897	0.604437
	0	5000	1	3.69897	3.69897		1720	500	3.23553	2.69897	0.834167		870	300	2.93952	2.47712	0.842696
	80000	120000	4.90309	5.07918	1.03591		120000	4000	5.07918	3.60206	0.709181		105800	18000	5.02449	4.25527	0.846907
	15000	5000	4.17609	3.69897	0.885749		12060	0	4.08135	0	0		25804	1000	4.41169	3	0.680012
	20000	5000	4.30103	3.69897	0.86002		30000	0	4.47712	0	0		65700	0	4.81757	0	0
	80000	5000	4.90309	3.69897	0.754416		40200	4000	4.60423	3.60206	0.782338		33600	1000	4.52634	3	0.662787
	122300	5000	5.08743	3.69897	0.727081		30000	100	4.47712	2	0.446716		32140	200	4.50705	2.30103	0.510541
	175000	5000	5.24304	3.69897	0.705501		40000	12000	4.60206	4.07918	0.886382		0	4859.94	1	3.68663	3.68663
	120000	5000	5.07918	3.69897	0.728261		3352	13000	3.5253	4.11394	1.16698		20268	300	4.30681	2.47712	0.575164
	20000	120000	4.30103	5.07918	1.18092		30000	850	4.47712	2.92942	0.654309		68600	300	4.83632	2.47712	0.512191
	78800	120000	4.89653	5.07918	1.0373		100720	8000	5.00312	3.90309	0.780132		56780	2000	4.7542	3.30103	0.69434
	124000	120000	5.09342	5.07918	0.997204		46000	6000	4.66276	3.77815	0.810283		63000	600	4.79934	2.77815	0.578861
	25000	5000	4.39794	3.69897	0.841069		100000	500	5	2.69897	0.539794		0	6000	1	3.77815	3.77815
	150000	5000	5.17609	3.69897	0.714626		0	5000	1	3.69897	3.69897		0	0	0	0	0
	35000	5000	4.54407	3.69897	0.814022		42000	3000	4.62325	3.47712	0.752095		61610	1500	4.78965	3.17609	0.663115
	100000	5000	5	3.69897	0.739794		49440	100	4.69408	2	0.426069		0	1000	1	3	3
	12000	120000	4.07918	5.07918	1.24515		41700	20000	4.62014	4.30103	0.930931		21900	2000	4.34044	3.30103	0.760528
	18840	5000	4.27508	3.69897	0.86524		22100	1000	4.34439	3	0.690545		3350	3000	3.52504	3.47712	0.986405
	80000	5000	4.90309	3.69897	0.754416		84300	2000	4.92583	3.30103	0.670147		70000	5000	4.8451	3.69897	0.763446
	100000	5000	5	3.69897	0.739794		111900	0	5.04883	0	0		52600	1000	4.72099	3	0.635461
	15000	5000	4.17609	3.69897	0.885749		68160	1000	4.83353	3	0.620664		20905	800	4.32025	2.90309	0.671973
	140000	5000	5.14613	3.69897	0.718787		77000	5000	4.88649	3.69897	0.756979		22000	500	4.34242	2.69897	0.621536
	28000	5000	4.44716	3.69897	0.83176		63860	3000	4.80523	3.47712	0.723612		25510	2000	4.40671	3.30103	0.749092
	39920	5000	4.60119	3.69897	0.803916		42280	6500	4.62613	3.81291	0.824211		22080	700	4.344	2.8451	0.654949
	60000	5000	4.77815	3.69897	0.774143		52590	1200	4.7209	3.07918	0.652244		25660	20000	4.40926	4.30103	0.975455
	40000	5000	4.60206	3.69897	0.803764		11626	500	4.06543	2.69897	0.663883		3000	1000	3.47712	3	0.862783
	30000	5000	4.47712	3.69897	0.826194		111000	150000	5.04532	5.17609	1.02592		47601	43000	4.67762	4.63347	0.990562
	16000	5000	4.20412	3.69897	0.879844		8080	600	3.90741	2.77815	0.710995		72990	1900	4.86326	3.27875	0.674188
	22460	5000	4.35141	3.69897	0.850062		43240	2000	4.63589	3.30103	0.71206		30500	5000	4.4843	3.69897	0.824871
	20000	5000	4.30103	3.69897	0.86002		24100	2000	4.38202	3.30103	0.753313		58200	3000	4.76492	3.47712	0.729733
	80000	5000	4.90309	3.69897	0.754416		50000	5000	4.69897	3.69897	0.787187		103800	1000	5.0162	3	0.598063
	50000	5000	4.69897	3.69897	0.787187		40000	12000	4.60206	4.07918	0.886382		25180	1300	4.40106	3.11394	0.707545
	200000	5000	5.30103	3.69897	0.697783		40000	500	4.60206	2.69897	0.58647		14110	3000	4.14953	3.47712	0.837956
	60000	120000	4.77815	5.07918	1.063		26330	500	4.42045	2.69897	0.610564		40250	600	4.60477	2.77815	0.603321
	65000	120000	4.81291	5.07918	1.05532		66005	7000	4.81958	3.8451	0.797808		54500	4200	4.7364	3.62325	0.76498
	38550	5000	4.58602	3.69897	0.806574		12000	0	4.07918	0	0		2000	700	3.30103	2.8451	0.861882
	5000	120000	3.69897	5.07918	1.37313		3000	300	3.47712	2.47712	0.712406		6790	1200	3.83187	3.07918	0.803571
	8400	5000	3.92428	3.69897	0.942586		7005	500	3.84541	2.69897	0.701868		2220	1500	3.34635	3.17609	0.94912
	27500	120000	4.43933	5.07918	1.14413		73000	600	4.86332	2.77815	0.571245		25120	15000	4.40002	4.17609	0.949107
	67200	5000	4.82737	3.69897	0.76625		17600	0	4.24551	0	0		3100	1000	3.49136	3	0.859264
	27300	5000	4.43616	3.69897	0.833822		24000	0	4.38021	0	0		32800	0	4.51587	0	0
	90000	120000	4.95424	5.07918	1.02522		176700	5000	5.24724	3.69897	0.704937		6240	2000	3.79518	3.30103	0.869794
	82100	120000	4.91434	5.07918	1.03354		60050	2000	4.77851	3.30103	0.690807		61410	1500	4.78824	3.17609	0.663311
	90400	120000	4.95617	5.07918	1.02482		107005	3400	5.0294	3.53148	0.702166		31900	2000	4.50379	3.30103	0.732945
	180000	120000	5.25527	5.07918	0.966492		137000	4000	5.13672	3.60206	0.701237		54610	2000	4.73727	3.30103	0.696821
	10000	120000	4	5.07918	1.2698		16000	800	4.20412	2.90309	0.690535		3300	500	3.51851	2.69897	0.767077
	148000	5000	5.17026	3.69897	0.715432		51050	540	4.708	2.73239	0.580373		21350	210	4.3294	2.32222	0.536384
	8500	5000	3.92942	3.69897	0.941353		22440	5000	4.35102	3.69897	0.850138		10660	500	4.02776	2.69897	0.670093
	10000	5000	4	3.69897	0.924743		9000	0	3.95424	0	0		8600	0	3.9345	0	0
	10000	5000	4	3.69897	0.924743		10000	1500	4	3.17609	0.794023		5800	100000	3.76343	5	1.32858
	10000	120000	4	5.07918	1.2698		10000	2000	4	3.30103	0.825257		6600	2000	3.81954	3.30103	0.864247
	30000	120000	4.47712	5.07918	1.13447		25000	20000	4.39794	4.30103	0.977965		30010	0	4.47727	0	0
	15500	5000	4.19033	3.69897	0.882739		0	0	0	0	0		0	0	0	0	0
	6000	5000	3.77815	3.69897	0.979042		13600	7000	4.13354	3.8451	0.930219		3000	12000	3.47712	4.07918	1.17315
	40000	120000	4.60206	5.07918	1.10368		30000	6000	4.47712	3.77815	0.84388		27260	0	4.43553	0	0
	70000	5000	4.8451	3.69897	0.763446		50000	0	4.69897	0	0		43000	0	4.63347	0	0
	14000	5000	4.14613	3.69897	0.89215		20000	500	4.30103	2.69897	0.627517		21000	1000	4.32222	3	0.694088
	60000	5000	4.77815	3.69897	0.774143		40000	1600	4.60206	3.20412	0.696236		32000	3000	4.50515	3.47712	0.77181
	30000	120000	4.47712	5.07918	1.13447		50000	200	4.69897	2.30103	0.489688		17660	0	4.24699	0	0
	25000	5000	4.39794	3.69897	0.841069		25000	2000	4.39794	3.30103	0.750585		46000	10000	4.66276	4	0.857861
	3360	5000	3.52634	3.69897	1.04895		3000	13000	3.47712	4.11394	1.18315		0	0	0	0	0
	34000	5000	4.53148	3.69897	0.816283		8000	500	3.90309	2.69897	0.691496		10000	5000	4	3.69897	0.924743
	40000	120000	4.60206	5.07918	1.10368		40000	20000	4.60206	4.30103	0.934588		3050	15000	3.4843	4.17609	1.19855
	70000	5000	4.8451	3.69897	0.763446		40000	500	4.60206	2.69897	0.58647		40700	0	4.60959	0	0
	30000	5000	4.47712	3.69897	0.826194		40000	3400	4.60206	3.53148	0.767369		11800	0	4.07188	0	0
	106080	5000	5.02563	3.69897	0.736021		30000	3000	4.47712	3.47712	0.776642		17700	3000	4.24797	3.47712	0.818537
	60450	5000	4.7814	3.69897	0.773617		52000	3000	4.716	3.47712	0.737303		50000	5000	4.69897	3.69897	0.787187
	88000	120000	4.94448	5.07918	1.02724		52000	15000	4.716	4.17609	0.885515		30000	20000	4.47712	4.30103	0.960669
	178000	5000	5.25042	3.69897	0.704509		14000	10000	4.14613	4	0.964756		30000	30000	4.47712	4.47712	1
	140000	5000	5.14613	3.69897	0.718787		30000	0	4.47712	0	0		24000	0	4.38021	0	0
	70800	120000	4.85003	5.07918	1.04725		48000	0	4.68124	0	0		40000	15000	4.60206	4.17609	0.90744
	126600	5000	5.10243	3.69897	0.724942		120800	3000	5.08207	3.47712	0.684194		91800	2000	4.96284	3.30103	0.665149
	163200	120000	5.21272	5.07918	0.974382		34000	0	4.53148	0	0		34000	1000	4.53148	3	0.662036
	157600	5000	5.19756	3.69897	0.711675		144000	4000	5.15836	3.60206	0.698295		40000	2000	4.60206	3.30103	0.717294
	56400	5000	4.75128	3.69897	0.778521		24000	600	4.38021	2.77815	0.634251		18000	0	4.25527	0	0
	124400	120000	5.09482	5.07918	0.99693		30000	5000	4.47712	3.69897	0.826194		20000	3000	4.30103	3.47712	0.808439
	100800	120000	5.00346	5.07918	1.01513		41000	12000	4.61278	4.07918	0.884321		35000	6000	4.54407	3.77815	0.831447
	190000	120000	5.27875	5.07918	0.962193		44000	4000	4.64345	3.60206	0.775729		25000	10000	4.39794	4	0.909517
	192000	5000	5.2833	3.69897	0.700125		90000	3000	4.95424	3.47712	0.701847		74000	5000	4.86923	3.69897	0.759662
	111200	120000	5.0461	5.07918	1.00655		26000	3000	4.41497	3.47712	0.787575		20000	2800	4.30103	3.44716	0.801473
	60400	5000	4.78104	3.69897	0.773675		38000	3000	4.57978	3.47712	0.759233		27000	8000	4.43136	3.90309	0.880788
	57600	5000	4.76042	3.69897	0.777026		50000	10000	4.69897	4	0.85125		38000	30000	4.57978	4.47712	0.977584
	62650	5000	4.79692	3.69897	0.771113		50000	7000	4.69897	3.8451	0.818285		13700	100	4.13672	2	0.483475
	70000	5000	4.8451	3.69897	0.763446		62800	3000	4.79796	3.47712	0.724708		63100	500	4.80003	2.69897	0.562282
	40000	5000	4.60206	3.69897	0.803764		30000	7000	4.47712	3.8451	0.858833		44530	22000	4.64865	4.34242	0.934125
	40000	120000	4.60206	5.07918	1.10368		40600	500	4.60853	2.69897	0.585647		32200	0	4.50786	0	0
	40000	120000	4.60206	5.07918	1.10368		30000	2000	4.47712	3.30103	0.737311		24000	5000	4.38021	3.69897	0.844473
	38100	5000	4.58092	3.69897	0.807472		54500	600	4.7364	2.77815	0.586554		66000	17000	4.81954	4.23045	0.87777
	30000	120000	4.47712	5.07918	1.13447		30000	6000	4.47712	3.77815	0.84388		8500	1000	3.92942	3	0.763472
	50000	5000	4.69897	3.69897	0.787187		42900	0	4.63246	0	0		20800	0	4.31806	0	0
	2680	5000	3.42813	3.69897	1.079		2125	0	3.32736	0	0		5620	8000	3.74974	3.90309	1.0409
	180000	120000	5.25527	5.07918	0.966492		161300	12000	5.20763	4.07918	0.783308		125000	0	5.09691	0	0
	50000	5000	4.69897	3.69897	0.787187		20000	0	4.30103	0	0		26600	0	4.42488	0	0
	50000	5000	4.69897	3.69897	0.787187		20000	0	4.30103	0	0		26600	0	4.42488	0	0
	51500	5000	4.71181	3.69897	0.785043		56300	10000	4.75051	4	0.842015		7400	0	3.86923	0	0
	3000	5000	3.47712	3.69897	1.0638		4000	300	3.60206	2.47712	0.687696		600	0	2.77815	0	0
	30000	5000	4.47712	3.69897	0.826194		74000	2000	4.86923	3.30103	0.677937		31980	1000	4.50488	3	0.665945
	30000	5000	4.47712	3.69897	0.826194		74000	2000	4.86923	3.30103	0.677937		31980	1000	4.50488	3	0.665945
	50000	5000	4.69897	3.69897	0.787187		32000	3000	4.50515	3.47712	0.77181		25000	5000	4.39794	3.69897	0.841069
	10000	5000	4	3.69897	0.924743		10005	10000	4.00022	4	0.999946		13800	1300	4.13988	3.11394	0.752182
	53680	120000	4.72981	5.07918	1.07387		30500	30000	4.4843	4.47712	0.998399		29000	2000	4.4624	3.30103	0.739744
	20000	5000	4.30103	3.69897	0.86002		50000	200	4.69897	2.30103	0.489688		12050	300	4.08099	2.47712	0.606991
	50000	5000	4.69897	3.69897	0.787187		20000	0	4.30103	0	0		34400	500	4.53656	2.69897	0.594938
	84500	5000	4.92686	3.69897	0.750777		0	0	0	0	0		0	0	0	0	0
	40000	5000	4.60206	3.69897	0.803764		45000	5000	4.65321	3.69897	0.794928		36940	10000	4.5675	4	0.875753
	33000	120000	4.51851	5.07918	1.12408		25300	500	4.40312	2.69897	0.612968		57250	0	4.75778	0	0
	250000	120000	5.39794	5.07918	0.940948		0	0	0	0	0		300000	1000	5.47712	3	0.547733
	50000	120000	4.69897	5.07918	1.08091		15000	4000	4.17609	3.60206	0.862543		4250	1500	3.62839	3.17609	0.875345
	123310	120000	5.091	5.07918	0.997679		30150	4000	4.47929	3.60206	0.804159		46450	200	4.66699	2.30103	0.493044
	13400	5000	4.1271	3.69897	0.896263		50000	300	4.69897	2.47712	0.527163		20281	15500	4.30709	4.19033	0.972892
	50000	5000	4.69897	3.69897	0.787187		61500	2300	4.78888	3.36173	0.701987		27674	1300	4.44207	3.11394	0.701011
	1200	120000	3.07918	5.07918	1.64952		7000	5000	3.8451	3.69897	0.961996		2220	6000	3.34635	3.77815	1.12904
	21010	120000	4.32243	5.07918	1.17508		47000	5000	4.6721	3.69897	0.791715		20400	300	4.30963	2.47712	0.574787
	10000	5000	4	3.69897	0.924743		10000	0	4	0	0		3900	2400	3.59106	3.38021	0.941284
	28300	5000	4.45179	3.69897	0.830896		50210	3000	4.70079	3.47712	0.739689		111100	2000	5.04571	3.30103	0.654225
	43500	5000	4.63849	3.69897	0.797451		5200	32000	3.716	4.50515	1.21236		0	7000	1	3.8451	3.8451
	30000	5000	4.47712	3.69897	0.826194		80000	300	4.90309	2.47712	0.505216		68300	150	4.83442	2.17609	0.450125
	47860	5000	4.67997	3.69897	0.790383		86640	8000	4.93772	3.90309	0.790464		60000	0	4.77815	0	0
	50000	120000	4.69897	5.07918	1.08091		100000	5000	5	3.69897	0.739794		20650	500	4.31492	2.69897	0.625497
	60000	5000	4.77815	3.69897	0.774143		112600	7000	5.05154	3.8451	0.761174		57700	3000	4.76118	3.47712	0.730307
	80000	5000	4.90309	3.69897	0.754416		40000	0	4.60206	0	0		62000	15000	4.79239	4.17609	0.8714
	45000	120000	4.65321	5.07918	1.09154		110000	260	5.04139	2.41497	0.479029		60600	400	4.78247	2.60206	0.544083
	45000	120000	4.65321	5.07918	1.09154		110000	260	5.04139	2.41497	0.479029		60600	400	4.78247	2.60206	0.544083
	20950	120000	4.32118	5.07918	1.17541		15000	2000	4.17609	3.30103	0.790459		20200	5500	4.30535	3.74036	0.868771
	127150	120000	5.10432	5.07918	0.995076		95100	60000	4.97818	4.77815	0.959819		80500	400	4.9058	2.60206	0.530405
	117600	5000	5.07041	3.69897	0.729521		80000	500	4.90309	2.69897	0.550463		65000	1200	4.81291	3.07918	0.639775
	34000	5000	4.53148	3.69897	0.816283		45000	2500	4.65321	3.39794	0.730235		34520	13000	4.53807	4.11394	0.90654
	10000	5000	4	3.69897	0.924743		13450	1000	4.12872	3	0.726617		43500	300	4.63849	2.47712	0.534036
	40000	5000	4.60206	3.69897	0.803764		40000	1700	4.60206	3.23045	0.701957		40840	500	4.61109	2.69897	0.585322
	130000	5000	5.11394	3.69897	0.723311		100000	5000	5	3.69897	0.739794		85800	12000	4.93349	4.07918	0.826835
	36500	120000	4.56229	5.07918	1.1133		122000	0	5.08636	0	0		45500	5000	4.65801	3.69897	0.794109
	214500	120000	5.33143	5.07918	0.952687		60000	2000	4.77815	3.30103	0.690859		105500	0	5.02325	0	0
	120000	5000	5.07918	3.69897	0.728261		90600	4000	4.95713	3.60206	0.726642		73600	1000	4.86688	3	0.616412
	30000	5000	4.47712	3.69897	0.826194		84436	600	4.92653	2.77815	0.563917		56240	10000	4.75005	4	0.842097
	44790	5000	4.65118	3.69897	0.795275		25700	340	4.40993	2.53148	0.57404		23750	2000	4.37566	3.30103	0.754407
	112375	5000	5.05067	3.69897	0.732372		55000	5000	4.74036	3.69897	0.780314		61400	3000	4.78817	3.47712	0.72619
	40000	5000	4.60206	3.69897	0.803764		20000	2000	4.30103	3.30103	0.767498		4200	0	3.62325	0	0
	141320	5000	5.1502	3.69897	0.718218		64194	0	4.80749	0	0		35550	500	4.55084	2.69897	0.593071
	60000	5000	4.77815	3.69897	0.774143		50400	3000	4.70243	3.47712	0.739431		3900	6000	3.59106	3.77815	1.0521
	40000	120000	4.60206	5.07918	1.10368		66400	2000	4.82217	3.30103	0.684553		32295	4000	4.50914	3.60206	0.798836
	40000	120000	4.60206	5.07918	1.10368		66400	2000	4.82217	3.30103	0.684553		32295	4000	4.50914	3.60206	0.798836
	20000	5000	4.30103	3.69897	0.86002		18610	200	4.26975	2.30103	0.538915		46360	50	4.66614	1.69897	0.364106
	50000	5000	4.69897	3.69897	0.787187		37000	4000	4.5682	3.60206	0.788507		70175	500	4.84618	2.69897	0.556927
	100	5000	2	3.69897	1.84949		14380	1400	4.15776	3.14613	0.756688		26460	1200	4.42259	3.07918	0.696239
	60000	5000	4.77815	3.69897	0.774143		50000	10000	4.69897	4	0.85125		49100	27000	4.69108	4.43136	0.944636
	60000	5000	4.77815	3.69897	0.774143		50000	10000	4.69897	4	0.85125		49100	27000	4.69108	4.43136	0.944636
	10	5000	1	3.69897	3.69897		25000	3000	4.39794	3.47712	0.790625		16490	4000	4.21722	3.60206	0.854131
	190649	5000	5.28023	3.69897	0.700531		140000	5000	5.14613	3.69897	0.718787		180250	2000	5.25588	3.30103	0.628065
	48000	5000	4.68124	3.69897	0.790169		18000	1083	4.25527	3.03463	0.713146		82000	1500	4.91381	3.17609	0.64636
	50000	5000	4.69897	3.69897	0.787187		26482	900	4.42295	2.95424	0.667935		25240	900	4.40209	2.95424	0.6711
	94000	5000	4.97313	3.69897	0.743791		61600	2000	4.78958	3.30103	0.689211		44000	1800	4.64345	3.25527	0.701046
	80000	5000	4.90309	3.69897	0.754416		69300	6000	4.84073	3.77815	0.780492		62500	1000	4.79588	3	0.625537
	47500	5000	4.67669	3.69897	0.790937		12500	100	4.09691	2	0.488173		900	2300	2.95424	3.36173	1.13793
	31000	120000	4.49136	5.07918	1.13088		112600	3000	5.05154	3.47712	0.688329		102500	2000	5.01072	3.30103	0.658793
	100700	120000	5.00303	5.07918	1.01522		48000	0	4.68124	0	0		52500	600	4.72016	2.77815	0.588572
	85000	5000	4.92942	3.69897	0.750387		74000	0	4.86923	0	0		0	500	1	2.69897	2.69897
	26000	120000	4.41497	5.07918	1.15044		40000	500	4.60206	2.69897	0.58647		10000	2000	4	3.30103	0.825257
	57300	5000	4.75815	3.69897	0.777396		30000	12000	4.47712	4.07918	0.911117		31798	10000	4.5024	4	0.888415
	85000	5000	4.92942	3.69897	0.750387		41800	1000	4.62118	3	0.649185		0	0	0	0	0
	50150	120000	4.70027	5.07918	1.08061		50000	10000	4.69897	4	0.85125		0	3300	1	3.51851	3.51851
	32000	5000	4.50515	3.69897	0.821054		90000	33000	4.95424	4.51851	0.912049		0	1500	1	3.17609	3.17609
	150000	5000	5.17609	3.69897	0.714626		96000	700	4.98227	2.8451	0.571044		70000	1500	4.8451	3.17609	0.655527
	70000	5000	4.8451	3.69897	0.763446		65010	3000	4.81298	3.47712	0.722447		0	4000	1	3.60206	3.60206
	150000	5000	5.17609	3.69897	0.714626		90000	6000	4.95424	3.77815	0.762609		105400	5000	5.02284	3.69897	0.73643
	132500	5000	5.12222	3.69897	0.722143		75000	18000	4.87506	4.25527	0.872865		80000	10000	4.90309	4	0.815812
	50000	5000	4.69897	3.69897	0.787187		53800	3000	4.73078	3.47712	0.734999		29300	4000	4.46687	3.60206	0.806395
	320000	5000	5.50515	3.69897	0.671911		220000	7000	5.34242	3.8451	0.719729		33000	7000	4.51851	3.8451	0.850965
	46000	5000	4.66276	3.69897	0.793301		8336000	5000	6.92096	3.69897	0.534459		22080	28000	4.344	4.44716	1.02375
	0	5000	1	3.69897	3.69897		790320	13000	5.8978	4.11394	0.697538		19200	4000	4.2833	3.60206	0.840954
	30000	5000	4.47712	3.69897	0.826194		90000	2000	4.95424	3.30103	0.666304		30000	1000	4.47712	3	0.670073
	60000	120000	4.77815	5.07918	1.063		150000	0	5.17609	0	0		100000	3000	5	3.47712	0.695424
	76200	5000	4.88195	3.69897	0.757682		456000	4000	5.65896	3.60206	0.636523		34000	1000	4.53148	3	0.662036
	62000	5000	4.79239	3.69897	0.771842		1346000	700	6.12905	2.8451	0.464199		9600	100	3.98227	2	0.502226
	113000	120000	5.05308	5.07918	1.00517		887000	500	5.94792	2.69897	0.453767		0	700	1	2.8451	2.8451
	40000	5000	4.60206	3.69897	0.803764		956000	2000	5.98046	3.30103	0.551969		82800	500	4.91803	2.69897	0.548791
	36000	5000	4.5563	3.69897	0.811836		36000	5000	4.5563	3.69897	0.811836		33600	114400	4.52634	5.05843	1.11755
	338600	120000	5.52969	5.07918	0.91853		253880	10000	5.40463	4	0.740106		153000	4000	5.18469	3.60206	0.694749
	201500	5000	5.30428	3.69897	0.697356		122300	15000	5.08743	4.17609	0.820865		40000	1000	4.60206	3	0.651882
	160000	5000	5.20412	3.69897	0.710777		1132000	15000	6.05385	4.17609	0.689824		189600	5000	5.27784	3.69897	0.700849
	32000	5000	4.50515	3.69897	0.821054		25850	600	4.41246	2.77815	0.629615		14000	500	4.14613	2.69897	0.650962
	257000	120000	5.40993	5.07918	0.938862		133600	5000	5.12581	3.69897	0.721637		90000	12000	4.95424	4.07918	0.823371
	250000	120000	5.39794	5.07918	0.940948		180000	70000	5.25527	4.8451	0.92195		117000	0	5.06819	0	0
	200000	120000	5.30103	5.07918	0.95815		246000	30000	5.39094	4.47712	0.830491		106000	2000	5.02531	3.30103	0.656881
	150250	120000	5.17681	5.07918	0.98114		169500	2600	5.22917	3.41497	0.653062		87440	1000	4.94171	3	0.607077
	260000	120000	5.41497	5.07918	0.937988		138200	22000	5.14051	4.34242	0.844746		275000	5000	5.43933	3.69897	0.680041
	187000	120000	5.27184	5.07918	0.963455		176800	10000	5.24748	4	0.76227		156800	5000	5.19535	3.69897	0.711978
	232000	120000	5.36549	5.07918	0.946639		220000	7000	5.34242	3.8451	0.719729		171296	1600	5.23375	3.20412	0.612204
	80000	120000	4.90309	5.07918	1.03591		79900	3000	4.90255	3.47712	0.709248		121200	5000	5.0835	3.69897	0.727642
	148600	5000	5.17202	3.69897	0.715189		275000	1000	5.43933	3	0.551538		308400	300	5.48911	2.47712	0.451279
	66500	5000	4.82282	3.69897	0.766972		81000	3500	4.90849	3.54407	0.722029		56900	2400	4.75511	3.38021	0.710858
	17200	5000	4.23553	3.69897	0.87332		16100	800	4.20683	2.90309	0.69009		121300	800	5.08386	2.90309	0.57104
	96400	5000	4.98408	3.69897	0.742157		74200	10000	4.8704	4	0.821287		77600	14000	4.88986	4.14613	0.847903
	36000	120000	4.5563	5.07918	1.11476		36005	1000	4.55636	3	0.65842		32300	1000	4.5092	3	0.665306
	250000	120000	5.39794	5.07918	0.940948		232100	5000	5.36568	3.69897	0.689376		15300	0	4.18469	0	0
	89000	120000	4.94939	5.07918	1.02622		100000	1000	5	3	0.6		9120	1700	3.95999	3.23045	0.815771
	81600	120000	4.91169	5.07918	1.0341		135000	3000	5.13033	3.47712	0.677757		128000	300	5.10721	2.47712	0.485024
	18010	5000	4.25551	3.69897	0.869218		15600	450	4.19312	2.65321	0.632753		14400	80	4.15836	1.90309	0.457654
	75000	120000	4.87506	5.07918	1.04187		76870	550	4.88576	2.74036	0.560888		193240	300	5.2861	2.47712	0.468611
	56400	5000	4.75128	3.69897	0.778521		41300	500	4.61595	2.69897	0.584705		41800	600	4.62118	2.77815	0.601178
	175000	5000	5.24304	3.69897	0.705501		139400	1000	5.14426	3	0.583174		82000	2000	4.91381	3.30103	0.671786
	194000	5000	5.2878	3.69897	0.699529		200000	20000	5.30103	4.30103	0.811357		372800	6000	5.57148	3.77815	0.678124
	263990	5000	5.42159	3.69897	0.682267		168600	30000	5.22686	4.47712	0.856561		163500	6000	5.21352	3.77815	0.724684
	150000	120000	5.17609	5.07918	0.981277		471100	1000	5.67311	3	0.52881		42500	0	4.62839	0	0
	100000	120000	5	5.07918	1.01584		68000	600	4.83251	2.77815	0.574888		70000	1000	4.8451	3	0.619183
	56000	120000	4.74819	5.07918	1.06971		44000	3900	4.64345	3.59106	0.773361		36000	4000	4.5563	3.60206	0.790566
	80000	5000	4.90309	3.69897	0.754416		55000	5000	4.74036	3.69897	0.780314		63000	5000	4.79934	3.69897	0.770725
	30000	5000	4.47712	3.69897	0.826194		35800	15000	4.55388	4.17609	0.91704		25125	3500	4.40011	3.54407	0.805451
	123700	5000	5.09237	3.69897	0.726375		148000	3000	5.17026	3.47712	0.672523		58370	1000	4.76619	3	0.629434
	9700	5000	3.98677	3.69897	0.927811		62000	500	4.79239	2.69897	0.563178		78210	300	4.89326	2.47712	0.506231
	62300	5000	4.79449	3.69897	0.771505		52770	1000	4.72239	3	0.635272		50550	1000	4.70372	3	0.637793
	72030	5000	4.85751	3.69897	0.761495		84070	180	4.92464	2.25527	0.457957		75500	300	4.87795	2.47712	0.50782
	19500	5000	4.29003	3.69897	0.862224		15000	1000	4.17609	3	0.718375		6890	2000	3.83822	3.30103	0.860042
	20600	5000	4.31387	3.69897	0.85746		25000	0	4.39794	0	0		27050	400	4.43217	2.60206	0.587085
	20600	5000	4.31387	3.69897	0.85746		25000	0	4.39794	0	0		27050	400	4.43217	2.60206	0.587085
	42360	5000	4.62696	3.69897	0.799439		142500	0	5.15381	0	0		120600	12000	5.08135	4.07918	0.802776
	68000	5000	4.83251	3.69897	0.765435		44900	4500	4.65225	3.65321	0.785258		35210	6000	4.54667	3.77815	0.830972
	68000	5000	4.83251	3.69897	0.765435		44900	4500	4.65225	3.65321	0.785258		35210	6000	4.54667	3.77815	0.830972
	6800	5000	3.83251	3.69897	0.965156		5570	1500	3.74586	3.17609	0.847895		4860	1000	3.68664	3	0.81375
	60000	5000	4.77815	3.69897	0.774143		40170	600	4.6039	2.77815	0.603434		61270	3000	4.78725	3.47712	0.72633
	150000	5000	5.17609	3.69897	0.714626		133600	3000	5.12581	3.47712	0.678356		82835	5000	4.91821	3.69897	0.752096
	13710	5000	4.13704	3.69897	0.894111		27060	2500	4.43233	3.39794	0.766627		29390	4000	4.4682	3.60206	0.806155
	75770	5000	4.8795	3.69897	0.758064		70570	600	4.84862	2.77815	0.572978		101880	6000	5.00809	3.77815	0.75441
	75770	5000	4.8795	3.69897	0.758064		70570	600	4.84862	2.77815	0.572978		101880	6000	5.00809	3.77815	0.75441
	115000	5000	5.0607	3.69897	0.730921		87384	2500	4.94143	3.39794	0.687643		76000	3500	4.88081	3.54407	0.726122
	67100	5000	4.82672	3.69897	0.766352		78300	500	4.89376	2.69897	0.551512		56400	500	4.75128	2.69897	0.568051
	66650	5000	4.8238	3.69897	0.766817		61000	1000	4.78533	3	0.626916		33480	1000	4.52479	3	0.663015
	151480	5000	5.18036	3.69897	0.714038		131350	50	5.11843	1.69897	0.331932		118070	600	5.07214	2.77815	0.547728
	23000	5000	4.36173	3.69897	0.848052		30000	700	4.47712	2.8451	0.635475		33880	2000	4.52994	3.30103	0.728713
	250000	5000	5.39794	3.69897	0.685256		100000	1500	5	3.17609	0.635218		70200	300	4.84634	2.47712	0.511133
	400000	5000	5.60206	3.69897	0.660287		150000	7500	5.17609	3.87506	0.748646		0	18000	1	4.25527	4.25527
	2060	5000	3.31387	3.69897	1.11621		2000	3000	3.30103	3.47712	1.05334		1560	600	3.19312	2.77815	0.870042
	73400	5000	4.8657	3.69897	0.760214		100000	1200	5	3.07918	0.615836		54000	4000	4.73239	3.60206	0.76115
	58450	5000	4.76678	3.69897	0.775989		107000	2850	5.02938	3.45484	0.686932		99205	1500	4.99653	3.17609	0.635659
	15000	5000	4.17609	3.69897	0.885749		20000	500	4.30103	2.69897	0.627517		21680	20000	4.33606	4.30103	0.991921
	21500	5000	4.33244	3.69897	0.853785		22000	1500	4.34242	3.17609	0.73141		23200	2000	4.36549	3.30103	0.756165
	69900	5000	4.84448	3.69897	0.763544		20000	1100	4.30103	3.04139	0.707131		12200	2000	4.08636	3.30103	0.807817
	45820	5000	4.66106	3.69897	0.793591		43600	1000	4.63949	3	0.646623		42900	3000	4.63246	3.47712	0.7506
	117400	5000	5.06967	3.69897	0.729628		26000	2000	4.41497	3.30103	0.74769		2000	6000	3.30103	3.77815	1.14454
	4800	5000	3.68124	3.69897	1.00482		10000	2000	4	3.30103	0.825257		15400	10000	4.18752	4	0.955219
	147100	120000	5.16761	5.07918	0.982887		45000	1000	4.65321	3	0.644716		0	300	1	2.47712	2.47712
	15500	5000	4.19033	3.69897	0.882739		14000	480	4.14613	2.68124	0.646686		20300	1000	4.3075	3	0.69646
	42500	120000	4.62839	5.07918	1.0974		60000	30000	4.77815	4.47712	0.936999		118	30000	2.07188	4.47712	2.1609
	89900	120000	4.95376	5.07918	1.02532		58000	500	4.76343	2.69897	0.566602		40000	1000	4.60206	3	0.651882
	100000	120000	5	5.07918	1.01584		206000	700	5.31387	2.8451	0.53541		30000	700	4.47712	2.8451	0.635475
	75600	5000	4.87852	3.69897	0.758215		51200	0	4.70927	0	0		45000	2000	4.65321	3.30103	0.709409
	150000	5000	5.17609	3.69897	0.714626		80000	3000	4.90309	3.47712	0.709169		55000	500	4.74036	2.69897	0.569359
	121800	120000	5.08565	5.07918	0.998729		106800	500	5.02857	2.69897	0.536727		70000	600	4.8451	2.77815	0.573394
	220000	5000	5.34242	3.69897	0.692377		160000	2000	5.20412	3.30103	0.634311		216800	500	5.33606	2.69897	0.505798
	131800	5000	5.11992	3.69897	0.722467		225000	200	5.35218	2.30103	0.429924		0	1000	1	3	3
	203600	120000	5.30878	5.07918	0.956752		218000	500	5.33846	2.69897	0.505571		132000	600	5.12057	2.77815	0.542547
	101800	5000	5.00775	3.69897	0.738649		80010	10000	4.90314	4	0.815803		71500	5000	4.85431	3.69897	0.761998
	191000	5000	5.28103	3.69897	0.700425		101200	3000	5.00518	3.47712	0.694704		152500	3000	5.18327	3.47712	0.670835
	37800	5000	4.57749	3.69897	0.808078		80000	1000	4.90309	3	0.611859		82000	1000	4.91381	3	0.610524
	85280	5000	4.93085	3.69897	0.750169		40000	4700	4.60206	3.6721	0.797925		54000	5000	4.73239	3.69897	0.781628
	37800	5000	4.57749	3.69897	0.808078		80000	1000	4.90309	3	0.611859		82000	1000	4.91381	3	0.610524
	207600	5000	5.31723	3.69897	0.695658		80400	5000	4.90526	3.69897	0.754083		90000	45000	4.95424	4.65321	0.939238
	809600	5000	5.90827	3.69897	0.626066		112480	8000	5.05108	3.90309	0.772725		93000	0	4.96848	0	0
	128400	5000	5.10857	3.69897	0.724072		124000	500	5.09342	2.69897	0.529893		73000	0	4.86332	0	0
	185550	5000	5.26846	3.69897	0.702097		147300	1500	5.1682	3.17609	0.614545		100000	2500	5	3.39794	0.679588
	103600	120000	5.01536	5.07918	1.01273		185005	6000	5.26718	3.77815	0.7173		75000	10000	4.87506	4	0.820503
	174000	120000	5.24055	5.07918	0.969208		130000	150000	5.11394	5.17609	1.01215		90000	2500	4.95424	3.39794	0.685865
	44000	5000	4.64345	3.69897	0.796599		60000	1200	4.77815	3.07918	0.644429		36000	5500	4.5563	3.74036	0.820921
	121000	5000	5.08279	3.69897	0.727745		100000	1500	5	3.17609	0.635218		87580	4859.94	4.9424	3.68663	0.745918
	150000	5000	5.17609	3.69897	0.714626		60000	4000	4.77815	3.60206	0.753861		0	2000	1	3.30103	3.30103
	191700	5000	5.28262	3.69897	0.700215		250000	1000	5.39794	3	0.555768		176400	5000	5.2465	3.69897	0.705036
	39000	5000	4.59106	3.69897	0.805689		35000	500	4.54407	2.69897	0.593955		23600	500	4.37291	2.69897	0.617202
	160000	5000	5.20412	3.69897	0.710777		150000	800	5.17609	2.90309	0.560865		149000	500	5.17319	2.69897	0.521723
	160000	5000	5.20412	3.69897	0.710777		150000	800	5.17609	2.90309	0.560865		149000	500	5.17319	2.69897	0.521723
	150000	5000	5.17609	3.69897	0.714626		125000	200	5.09691	2.30103	0.451456		40500	1000	4.60746	3	0.651119
	54800	5000	4.73878	3.69897	0.780574		56840	600	4.75465	2.77815	0.584301		31300	2000	4.49554	3.30103	0.734289
	154080	5000	5.18775	3.69897	0.713021		90000	0	4.95424	0	0		80800	10000	4.90741	4	0.815094
	34800	5000	4.54158	3.69897	0.814468		43000	6000	4.63347	3.77815	0.815405		52400	1000	4.71933	3	0.635683
	40000	5000	4.60206	3.69897	0.803764		140000	10000	5.14613	4	0.777283		71400	500	4.8537	2.69897	0.556065
	95800	5000	4.98137	3.69897	0.742561		320000	6000	5.50515	3.77815	0.686294		111680	5000	5.04798	3.69897	0.732763
	137000	5000	5.13672	3.69897	0.720103		86000	1000	4.9345	3	0.607965		4200	450000	3.62325	5.65321	1.56026
	60000	5000	4.77815	3.69897	0.774143		145400	800	5.16256	2.90309	0.562335		17000	2000	4.23045	3.30103	0.780303
	250300	5000	5.39846	3.69897	0.68519		75000	4000	4.87506	3.60206	0.738875		0	7000	1	3.8451	3.8451
	120000	5000	5.07918	3.69897	0.728261		72000	1000	4.85733	3	0.617623		91980	1400	4.96369	3.14613	0.633828
	74600	5000	4.87274	3.69897	0.759115		220000	2000	5.34242	3.30103	0.61789		161300	7000	5.20763	3.8451	0.738358
	440000	5000	5.64345	3.69897	0.655444		359800	4000	5.55606	3.60206	0.648312		75512	2000	4.87802	3.30103	0.676716
	166500	5000	5.22141	3.69897	0.708423		175600	2000	5.24452	3.30103	0.629424		107355	0	5.03082	0	0
	71000	5000	4.85126	3.69897	0.762476		136580	2000	5.13539	3.30103	0.642801		86000	0	4.9345	0	0
	650000	5000	5.81291	3.69897	0.636337		270000	500	5.43136	2.69897	0.496923		330000	2000	5.51851	3.30103	0.598174
	6000	120000	3.77815	5.07918	1.34436		12420	1200	4.09412	3.07918	0.752098		16600	3000	4.22011	3.47712	0.823941
	120000	5000	5.07918	3.69897	0.728261		62100	9000	4.79309	3.95424	0.824988		80600	4000	4.90634	3.60206	0.734165
	72000	120000	4.85733	5.07918	1.04567		76600	500	4.88423	2.69897	0.552589		100000	2000	5	3.30103	0.660206
	7600	5000	3.88081	3.69897	0.953143		9320	6000	3.96942	3.77815	0.951815		1340	6000	3.1271	3.77815	1.20819
	96000	5000	4.98227	3.69897	0.742426		86000	1500	4.9345	3.17609	0.64365		108600	4000	5.03583	3.60206	0.715286
	70000	5000	4.8451	3.69897	0.763446		0	0	0	0	0		0	0	0	0	0
	96000	5000	4.98227	3.69897	0.742426		86000	1500	4.9345	3.17609	0.64365		108600	4000	5.03583	3.60206	0.715286
	105300	5000	5.02243	3.69897	0.73649		64500	40000	4.80956	4.60206	0.956857		38070	5000	4.58058	3.69897	0.807533
	173000	5000	5.23805	3.69897	0.706174		121200	2000	5.0835	3.30103	0.649361		130200	15000	5.11461	4.17609	0.816502
	36000	120000	4.5563	5.07918	1.11476		24300	1000	4.38561	3	0.684056		20100	1000	4.3032	3	0.697156
	200000	5000	5.30103	3.69897	0.697783		28400	1000	4.45332	3	0.673655		40160	2500	4.60379	3.39794	0.738074
	40000	5000	4.60206	3.69897	0.803764		44400	9000	4.64738	3.95424	0.850854		0	7000	1	3.8451	3.8451
	237120	120000	5.37497	5.07918	0.94497		108120	2000	5.03391	3.30103	0.655759		53650	5500	4.72957	3.74036	0.790846
	60000	5000	4.77815	3.69897	0.774143		250100	5000	5.39811	3.69897	0.685234		49950	10000	4.69854	4	0.851329
	192700	5000	5.28488	3.69897	0.699915		100175	1300	5.00076	3.11394	0.622694		61200	7000	4.78675	3.8451	0.803279
	32400	5000	4.51055	3.69897	0.820072		50000	35000	4.69897	4.54407	0.967035		11000	5500	4.04139	3.74036	0.925513
	53500	120000	4.72835	5.07918	1.0742		200000	0	5.30103	0	0		139500	30000	5.14457	4.47712	0.870261
	53500	120000	4.72835	5.07918	1.0742		200000	0	5.30103	0	0		139500	30000	5.14457	4.47712	0.870261
	45000	5000	4.65321	3.69897	0.794928		50000	1000	4.69897	3	0.638438		6000	10000	3.77815	4	1.05872
	84600	5000	4.92737	3.69897	0.750699		281000	10000	5.44871	4	0.734119		75000	2000	4.87506	3.30103	0.677126
	84600	5000	4.92737	3.69897	0.750699		281000	10000	5.44871	4	0.734119		75000	2000	4.87506	3.30103	0.677126
	41230	120000	4.61521	5.07918	1.10053		20000	10000	4.30103	4	0.93001		61440	2000	4.78845	3.30103	0.689373
	40000	5000	4.60206	3.69897	0.803764		100000	1000	5	3	0.6		84422	10400	4.92646	4.01703	0.8154
	38410	5000	4.58444	3.69897	0.806852		27000	100	4.43136	2	0.451328		30100	1000	4.47857	3	0.669857
	79000	5000	4.89763	3.69897	0.755258		17000	800	4.23045	2.90309	0.686237		61450	800	4.78852	2.90309	0.60626
	31250	5000	4.49485	3.69897	0.822935		50040	500	4.69932	2.69897	0.574332		67500	1000	4.8293	3	0.621208
	8188	5000	3.91318	3.69897	0.94526		6000	700	3.77815	2.8451	0.75304		2130	400	3.32838	2.60206	0.78178
	150000	5000	5.17609	3.69897	0.714626		60000	2000	4.77815	3.30103	0.690859		0	1000	1	3	3
	80000	5000	4.90309	3.69897	0.754416		170000	4000	5.23045	3.60206	0.688671		52000	2000	4.716	3.30103	0.699963
	150000	120000	5.17609	5.07918	0.981277		108000	600	5.03342	2.77815	0.551941		63150	200	4.80037	2.30103	0.479344
	35300	120000	4.54777	5.07918	1.11685		68500	15000	4.83569	4.17609	0.863598		24260	35000	4.38489	4.54407	1.0363
	70500	5000	4.84819	3.69897	0.762959		60000	500	4.77815	2.69897	0.564857		45540	1000	4.65839	3	0.643999
	31270	5000	4.49513	3.69897	0.822884		14000	80000	4.14613	4.90309	1.18257		76245	0	4.88221	0	0
	100000	5000	5	3.69897	0.739794		10000	10000	4	4	1		10320	10000	4.01368	4	0.996592
	50000	120000	4.69897	5.07918	1.08091		55000	2000	4.74036	3.30103	0.696367		28630	1600	4.45682	3.20412	0.718925
	37500	5000	4.57403	3.69897	0.808689		21000	2000	4.32222	3.30103	0.763735		32560	400	4.51268	2.60206	0.57661
	48000	120000	4.68124	5.07918	1.08501		60000	500	4.77815	2.69897	0.564857		41180	500	4.61469	2.69897	0.584865
	48000	120000	4.68124	5.07918	1.08501		60000	500	4.77815	2.69897	0.564857		41180	500	4.61469	2.69897	0.584865
	160000	5000	5.20412	3.69897	0.710777		30000	3000	4.47712	3.47712	0.776642		23160	600	4.36474	2.77815	0.636499
	400500	5000	5.6026	3.69897	0.660224		80000	500	4.90309	2.69897	0.550463		0	1000	1	3	3
	113900	5000	5.05652	3.69897	0.731524		92900	200	4.96802	2.30103	0.463169		13601	500	4.13357	2.69897	0.652939
	274200	5000	5.43807	3.69897	0.680199		2000000	200	6.30103	2.30103	0.365183		248300	300	5.39498	2.47712	0.459153
	50000	5000	4.69897	3.69897	0.787187		125000	30000	5.09691	4.47712	0.878399		122910	80000	5.08959	4.90309	0.963357
	26000	120000	4.41497	5.07918	1.15044		41000	300	4.61278	2.47712	0.537012		18800	400	4.27416	2.60206	0.608789
	26000	120000	4.41497	5.07918	1.15044		41000	300	4.61278	2.47712	0.537012		18800	400	4.27416	2.60206	0.608789
	76000	5000	4.88081	3.69897	0.757859		100000	1000	5	3	0.6		23600	500	4.37291	2.69897	0.617202
	60000	120000	4.77815	5.07918	1.063		80000	2000	4.90309	3.30103	0.673255		76000	7000	4.88081	3.8451	0.787799
	150000	5000	5.17609	3.69897	0.714626		120000	3000	5.07918	3.47712	0.684583		129400	500	5.11193	2.69897	0.527974
	73520	5000	4.86641	3.69897	0.760103		97700	5000	4.98989	3.69897	0.741292		44800	100	4.65128	2	0.429989
	30000	5000	4.47712	3.69897	0.826194		26000	700	4.41497	2.8451	0.64442		89900	4000	4.95376	3.60206	0.727137
	70000	5000	4.8451	3.69897	0.763446		28300	1000	4.45179	3	0.673887		80000	200	4.90309	2.30103	0.469302
	409025	5000	5.61175	3.69897	0.659147		181000	11000	5.25768	4.04139	0.768665		80000	5000	4.90309	3.69897	0.754416
	116850	120000	5.06763	5.07918	1.00228		132900	40000	5.12352	4.60206	0.898221		48600	30000	4.68664	4.47712	0.955295
	78800	120000	4.89653	5.07918	1.0373		82000	10000	4.91381	4	0.814032		125300	50000	5.09795	4.69897	0.921737
	78800	120000	4.89653	5.07918	1.0373		82000	10000	4.91381	4	0.814032		125300	50000	5.09795	4.69897	0.921737
	96000	5000	4.98227	3.69897	0.742426		30000	1000	4.47712	3	0.670073		40800	0	4.61066	0	0
	57400	5000	4.75891	3.69897	0.777272		50000	3600	4.69897	3.5563	0.756826		37760	8000	4.57703	3.90309	0.852756
	13730	5000	4.13767	3.69897	0.893974		6100	2500	3.78533	3.39794	0.89766		13620	43000	4.13418	4.63347	1.12077
	35000	5000	4.54407	3.69897	0.814022		72205	2000	4.85857	3.30103	0.679425		216900	5000	5.33626	3.69897	0.693177
	36928	5000	4.56736	3.69897	0.809871		24000	20000	4.38021	4.30103	0.981923		28370	300	4.45286	2.47712	0.556299
	240010	120000	5.38023	5.07918	0.944045		120000	4000	5.07918	3.60206	0.709181		0	1000	1	3	3
	70000	120000	4.8451	5.07918	1.04831		30000	4500	4.47712	3.65321	0.815974		55000	4000	4.74036	3.60206	0.75987
	150850	120000	5.17855	5.07918	0.980812		36000	700	4.5563	2.8451	0.624431		33590	4000	4.52621	3.60206	0.795823
	250600	120000	5.39898	5.07918	0.940767		110000	4000	5.04139	3.60206	0.714497		293927	2000	5.46824	3.30103	0.603673
	300000	5000	5.47712	3.69897	0.675349		396000	10000	5.5977	4	0.71458		0	7000	1	3.8451	3.8451
	263900	5000	5.42144	3.69897	0.682286		90000	6000	4.95424	3.77815	0.762609		114000	22000	5.0569	4.34242	0.858712
	102000	120000	5.0086	5.07918	1.01409		150000	4000	5.17609	3.60206	0.695903		150000	8000	5.17609	3.90309	0.754061
	90600	5000	4.95713	3.69897	0.746192		60000	10000	4.77815	4	0.837144		64800	2500	4.81158	3.39794	0.706201
	120000	5000	5.07918	3.69897	0.728261		154000	1000	5.18752	3	0.578311		131500	1200	5.11893	3.07918	0.601529
	250000	120000	5.39794	5.07918	0.940948		180000	10000	5.25527	4	0.76114		91860	30000	4.96313	4.47712	0.902077
	121550	120000	5.08475	5.07918	0.998904		107030	3000	5.02951	3.47712	0.691345		56160	1500	4.74943	3.17609	0.668731
	300000	5000	5.47712	3.69897	0.675349		200000	3000	5.30103	3.47712	0.655933		193000	1700	5.28556	3.23045	0.611184
	121000	5000	5.08279	3.69897	0.727745		170000	2000	5.23045	3.30103	0.631118		128250	2000	5.10806	3.30103	0.64624
	350000	5000	5.54407	3.69897	0.667194		110000	1000	5.04139	3	0.595074		236000	0	5.37291	0	0
	120000	120000	5.07918	5.07918	1		109000	2500	5.03743	3.39794	0.674539		60000	0	4.77815	0	0
	222000	5000	5.34635	3.69897	0.691868		270000	2000	5.43136	3.30103	0.607772		69500	24000	4.84198	4.38021	0.904631
	350000	120000	5.54407	5.07918	0.916147		220000	2000	5.34242	3.30103	0.61789		200720	1000	5.30259	3	0.565761
	60000	5000	4.77815	3.69897	0.774143		30000	100	4.47712	2	0.446716		15200	2000	4.18184	3.30103	0.789372
	8210	120000	3.91434	5.07918	1.29758		10000	1000	4	3	0.75		180300	8000	5.256	3.90309	0.742598
	111440	5000	5.04704	3.69897	0.732899		119700	3000	5.07809	3.47712	0.68473		24000	1000	4.38021	3	0.684898
	700000	120000	5.8451	5.07918	0.868964		368000	2000	5.56585	3.30103	0.593087		409600	3000	5.61236	3.47712	0.619547
	448000	5000	5.65128	3.69897	0.654537		470300	1000	5.67237	3	0.528879		152700	10000	5.18384	4	0.771629
	150000	5000	5.17609	3.69897	0.714626		212600	2000	5.32756	3.30103	0.619613		106600	0	5.02776	0	0
	100000	5000	5	3.69897	0.739794		42000	1200	4.62325	3.07918	0.666021		48000	8000	4.68124	3.90309	0.833772
	20000	5000	4.30103	3.69897	0.86002		86500	300	4.93702	2.47712	0.501745		0	900	1	2.95424	2.95424
	200000	5000	5.30103	3.69897	0.697783		1000000	40000	6	4.60206	0.76701		28000	0	4.44716	0	0
	7000	5000	3.8451	3.69897	0.961996		10000	2000	4	3.30103	0.825257		7840	1200	3.89432	3.07918	0.790686
	25000	5000	4.39794	3.69897	0.841069		20000	120	4.30103	2.07918	0.483415		12180	100	4.08565	2	0.489519
	80000	5000	4.90309	3.69897	0.754416		100000	7000	5	3.8451	0.76902		51000	10000	4.70757	4	0.849695
	260400	5000	5.41564	3.69897	0.683016		150000	100	5.17609	2	0.386392		133420	200	5.12522	2.30103	0.448962
	5500	5000	3.74036	3.69897	0.988934		6000	300	3.77815	2.47712	0.655644		5970	0	3.77597	0	0
	164600	5000	5.21643	3.69897	0.7091		200010	500	5.30105	2.69897	0.509139		181140	500	5.25801	2.69897	0.513306
	120500	120000	5.08099	5.07918	0.999645		103240	10000	5.01385	4	0.79779		100240	2000	5.00104	3.30103	0.660069
	114000	120000	5.0569	5.07918	1.00441		110000	0	5.04139	0	0		200000	0	5.30103	0	0
	112000	120000	5.04922	5.07918	1.00593		200000	1000	5.30103	3	0.565928		74400	30000	4.87157	4.47712	0.91903
	30000	5000	4.47712	3.69897	0.826194		150000	2000	5.17609	3.30103	0.637746		0	1000	1	3	3
	20000	5000	4.30103	3.69897	0.86002		10000	100	4	2	0.5		40360	500	4.60595	2.69897	0.585975
	60300	120000	4.78032	5.07918	1.06252		82935	400	4.91874	2.60206	0.52901		4240	300	3.62737	2.47712	0.682898
	140000	5000	5.14613	3.69897	0.718787		100000	2000	5	3.30103	0.660206		85100	400	4.92993	2.60206	0.527809
	106000	120000	5.02531	5.07918	1.01072		13800	5000	4.13988	3.69897	0.893497		17300	2500	4.23805	3.39794	0.80177
	112500	5000	5.05115	3.69897	0.732302		133500	0	5.12548	0	0		78000	300	4.89209	2.47712	0.506352
	13060	120000	4.11594	5.07918	1.23403		15190	12000	4.18156	4.07918	0.975517		12240	8380	4.08778	3.92324	0.959749
	17000	120000	4.23045	5.07918	1.20062		10000	3000	4	3.47712	0.86928		5580	10000	3.74663	4	1.06762
	36640	120000	4.56396	5.07918	1.11289		20440	3000	4.31048	3.47712	0.806667		42470	5000	4.62808	3.69897	0.799245
	28000	120000	4.44716	5.07918	1.14212		110255	17000	5.0424	4.23045	0.838976		13000	0	4.11394	0	0
	28000	120000	4.44716	5.07918	1.14212		110255	17000	5.0424	4.23045	0.838976		13000	0	4.11394	0	0
	146000	5000	5.16435	3.69897	0.71625		28020	300	4.44747	2.47712	0.556973		300900	1000	5.47842	3	0.547603
	7000	5000	3.8451	3.69897	0.961996		24000	300	4.38021	2.47712	0.565526		13930	400	4.14395	2.60206	0.627918
	70000	120000	4.8451	5.07918	1.04831		49550	500	4.69504	2.69897	0.574855		31440	1000	4.49748	3	0.66704
	9000	5000	3.95424	3.69897	0.935443		9000	400	3.95424	2.60206	0.658043		13340	500	4.12516	2.69897	0.654271
	11640	5000	4.06595	3.69897	0.909742		8000	0	3.90309	0	0		400	0	2.60206	0	0
	5640	120000	3.75128	5.07918	1.35399		37500	1000	4.57403	3	0.655877		14730	400	4.1682	2.60206	0.624264
	203640	5000	5.30886	3.69897	0.696754		69000	22000	4.83885	4.34242	0.897408		22320	2300	4.34869	3.36173	0.773043
	11250	120000	4.05115	5.07918	1.25376		10000	1200	4	3.07918	0.769795		7030	500	3.84696	2.69897	0.701586
	19000	5000	4.27875	3.69897	0.864497		30000	9000	4.47712	3.95424	0.883211		23730	0	4.3753	0	0
	5000	120000	3.69897	5.07918	1.37313		15910	12000	4.20167	4.07918	0.970848		14980	12000	4.17551	4.07918	0.97693
	250000	120000	5.39794	5.07918	0.940948		220000	3000	5.34242	3.47712	0.650851		61800	1000	4.79099	3	0.626176
	18000	120000	4.25527	5.07918	1.19362		14000	400	4.14613	2.60206	0.627588		38200	0	4.58206	0	0
	22000	5000	4.34242	3.69897	0.851822		73200	4000	4.86451	3.60206	0.740477		15300	2000	4.18469	3.30103	0.788835
	11000	5000	4.04139	3.69897	0.915271		37020	0	4.56844	0	0		31662	35000	4.50054	4.54407	1.00967
	18000	5000	4.25527	3.69897	0.869267		20000	200	4.30103	2.30103	0.534995		2920	300	3.46538	2.47712	0.714819
	73000	5000	4.86332	3.69897	0.760585		90000	1000	4.95424	3	0.605542		70000	100	4.8451	2	0.412788
	30000	120000	4.47712	5.07918	1.13447		85360	1000	4.93125	3	0.608364		3000	25000	3.47712	4.39794	1.26482
	30000	120000	4.47712	5.07918	1.13447		85360	1000	4.93125	3	0.608364		3000	25000	3.47712	4.39794	1.26482
	60150	5000	4.77924	3.69897	0.773967		61000	3000	4.78533	3.47712	0.726621		40000	500	4.60206	2.69897	0.58647
	160040	120000	5.20423	5.07918	0.975972		89960	8000	4.95405	3.90309	0.787859		110711	30000	5.04419	4.47712	0.88758
	141000	120000	5.14922	5.07918	0.986398		80000	2000	4.90309	3.30103	0.673255		40000	500	4.60206	2.69897	0.58647
	60700	5000	4.78319	3.69897	0.773327		0	0	0	0	0		0	0	0	0	0
	30000	5000	4.47712	3.69897	0.826194		140000	500	5.14613	2.69897	0.524466		56710	600	4.75366	2.77815	0.584424
	10000	5000	4	3.69897	0.924743		61800	3000	4.79099	3.47712	0.725763		36755.3	8000	4.56532	3.90309	0.854943
	130000	5000	5.11394	3.69897	0.723311		90840	1000	4.95828	3	0.605049		48420	3000	4.68502	3.47712	0.742178
	75000	120000	4.87506	5.07918	1.04187		9200	1500	3.96379	3.17609	0.801277		26700	3000	4.42651	3.47712	0.785522
	224840	120000	5.35187	5.07918	0.949047		26500	800	4.42325	2.90309	0.656326		11350	2000	4.055	3.30103	0.814065
	122400	5000	5.08778	3.69897	0.72703		50000	500	4.69897	2.69897	0.574375		0	500	1	2.69897	2.69897
	35120	5000	4.54555	3.69897	0.813756		120410	3000	5.08066	3.47712	0.684383		730	1000	2.86332	3	1.04773
	200000	120000	5.30103	5.07918	0.95815		230000	2000	5.36173	3.30103	0.615665		24000	2000	4.38021	3.30103	0.753623
	60000	5000	4.77815	3.69897	0.774143		75700	1000	4.8791	3	0.614868		61400	3000	4.78817	3.47712	0.72619
	30000	120000	4.47712	5.07918	1.13447		20360	2000	4.30878	3.30103	0.766117		3200	4859.94	3.50515	3.68663	1.05178
	400000	120000	5.60206	5.07918	0.906663		114000	2000	5.0569	3.30103	0.652777		181100	2000	5.25792	3.30103	0.627821
	400000	120000	5.60206	5.07918	0.906663		114000	2000	5.0569	3.30103	0.652777		181100	2000	5.25792	3.30103	0.627821
	84500	120000	4.92686	5.07918	1.03092		120000	8000	5.07918	3.90309	0.768449		48850	5000	4.68886	3.69897	0.788884
	56200	5000	4.74974	3.69897	0.778774		160900	500	5.20656	2.69897	0.518379		61100	200	4.78604	2.30103	0.480779
	30000	120000	4.47712	5.07918	1.13447		30000	23000	4.47712	4.36173	0.974226		40960	7000	4.61236	3.8451	0.833651
	50000	120000	4.69897	5.07918	1.08091		38900	4000	4.58995	3.60206	0.784771		96140	1200	4.9829	3.07918	0.617949
	40000	5000	4.60206	3.69897	0.803764		70000	2000	4.8451	3.30103	0.681313		126110	800	5.10075	2.90309	0.56915
	85200	120000	4.93044	5.07918	1.03017		35000	200	4.54407	2.30103	0.506381		24060	200	4.3813	2.30103	0.525194
	50000	5000	4.69897	3.69897	0.787187		70000	900	4.8451	2.95424	0.609738		50400	8000	4.70243	3.90309	0.830015
	70000	5000	4.8451	3.69897	0.763446		200000	0	5.30103	0	0		105810	0	5.02453	0	0
	30000	5000	4.47712	3.69897	0.826194		30000	5600	4.47712	3.74819	0.837187		86400	2500	4.93651	3.39794	0.688328
	50000	120000	4.69897	5.07918	1.08091		24580	2000	4.39058	3.30103	0.751843		89700	2000	4.95279	3.30103	0.666499
	13800	5000	4.13988	3.69897	0.893497		16000	1500	4.20412	3.17609	0.755471		76580.7	800	4.88412	2.90309	0.594394
	72030	5000	4.85751	3.69897	0.761495		35000	1000	4.54407	3	0.660201		30100	3000	4.47857	3.47712	0.776392
	80000	120000	4.90309	5.07918	1.03591		50000	500	4.69897	2.69897	0.574375		0	1000	1	3	3
	162850	120000	5.21179	5.07918	0.974556		88940	4300	4.9491	3.63347	0.734168		127700	6000	5.10619	3.77815	0.739916
	90000	5000	4.95424	3.69897	0.746627		80000	500	4.90309	2.69897	0.550463		39000	500	4.59106	2.69897	0.587875
	44680	120000	4.65011	5.07918	1.09227		30000	14000	4.47712	4.14613	0.92607		38100	4859.94	4.58092	3.68663	0.804779
	100000	120000	5	5.07918	1.01584		60000	3000	4.77815	3.47712	0.727713		72200	4000	4.85854	3.60206	0.741388
	20000	5000	4.30103	3.69897	0.86002		70000	600	4.8451	2.77815	0.573394		108900	3000	5.03703	3.47712	0.690312
	38000	120000	4.57978	5.07918	1.10904		34800	5000	4.54158	3.69897	0.814468		0	25000	1	4.39794	4.39794
	30300	120000	4.48144	5.07918	1.13338		30000	9000	4.47712	3.95424	0.883211		40000	0	4.60206	0	0
	40000	5000	4.60206	3.69897	0.803764		31720	500	4.50133	2.69897	0.599593		2500	600	3.39794	2.77815	0.817599
	130000	5000	5.11394	3.69897	0.723311		127500	2500	5.10551	3.39794	0.665544		25000	0	4.39794	0	0
	21880	5000	4.34005	3.69897	0.852288		8000	200	3.90309	2.30103	0.589541		500	400	2.69897	2.60206	0.964094
	68508	5000	4.83574	3.69897	0.764923		54900	1000	4.73957	3	0.632969		10700	200	4.02938	2.30103	0.571063
	200000	5000	5.30103	3.69897	0.697783		53640	5000	4.72949	3.69897	0.782108		400	200	2.60206	2.30103	0.884311
	50000	120000	4.69897	5.07918	1.08091		51520	14000	4.71198	4.14613	0.879913		99720	2000	4.99878	3.30103	0.660367
	50000	120000	4.69897	5.07918	1.08091		51520	14000	4.71198	4.14613	0.879913		99720	2000	4.99878	3.30103	0.660367
	20000	5000	4.30103	3.69897	0.86002		30000	0	4.47712	0	0		33210	2300	4.52127	3.36173	0.743536
	150000	5000	5.17609	3.69897	0.714626		120000	1500	5.07918	3.17609	0.625316		84920	1000	4.92901	3	0.608641
	6006	5000	3.77859	3.69897	0.97893		20000	70000	4.30103	4.8451	1.1265		59500	8000	4.77452	3.90309	0.817484
	110000	5000	5.04139	3.69897	0.73372		72000	0	4.85733	0	0		100655	300	5.00284	2.47712	0.495143
	170000	120000	5.23045	5.07918	0.971079		295500	11000	5.47056	4.04139	0.738753		274200	300	5.43807	2.47712	0.455515
	20000	5000	4.30103	3.69897	0.86002		75000	0	4.87506	0	0		57470	1000	4.75944	3	0.630326
	20000	5000	4.30103	3.69897	0.86002		75000	0	4.87506	0	0		57470	1000	4.75944	3	0.630326
	100000	120000	5	5.07918	1.01584		2160000	900	6.33445	2.95424	0.466377		50000	200	4.69897	2.30103	0.489688
	20000	5000	4.30103	3.69897	0.86002		21900	3600	4.34044	3.5563	0.819341		5880	50	3.76938	1.69897	0.45073
	90000	120000	4.95424	5.07918	1.02522		87000	3000	4.93952	3.47712	0.703939		30000	400	4.47712	2.60206	0.58119
	40000	5000	4.60206	3.69897	0.803764		121180	4600	5.08343	3.66276	0.720529		50000	2000	4.69897	3.30103	0.702501
	40000	5000	4.60206	3.69897	0.803764		121180	4600	5.08343	3.66276	0.720529		50000	2000	4.69897	3.30103	0.702501
	140000	5000	5.14613	3.69897	0.718787		74900	500	4.87448	2.69897	0.553694		64200	1000	4.80754	3	0.62402
	175900	120000	5.24527	5.07918	0.968336		75000	15000	4.87506	4.17609	0.856623		40950	5000	4.61225	3.69897	0.801988
	86480	120000	4.93692	5.07918	1.02882		15000	800	4.17609	2.90309	0.695169		37011.4	800	4.56834	2.90309	0.635481
	22000	5000	4.34242	3.69897	0.851822		14960	14000	4.17493	4.14613	0.993101		5450	1000	3.7364	3	0.802913
	1010750	5000	6.00464	3.69897	0.616018		5500000	100000	6.74036	5	0.7418		600	1000	2.77815	3	1.07985
	145000	5000	5.16137	3.69897	0.716665		175710	550	5.2448	2.74036	0.522492		71720	4000	4.85564	3.60206	0.74183
	18000	120000	4.25527	5.07918	1.19362		241200	1000	5.38238	3	0.557375		10500	7000	4.02119	3.8451	0.956209
	24045	5000	4.38102	3.69897	0.844316		181115	1000	5.25795	3	0.570564		416	400	2.61909	2.60206	0.993496
	150000	120000	5.17609	5.07918	0.981277		50000	0	4.69897	0	0		152498	0	5.18326	0	0
	13500	5000	4.13033	3.69897	0.895562		7000	550	3.8451	2.74036	0.71269		20001	2000	4.30105	3.30103	0.767494
	79230	5000	4.89889	3.69897	0.755063		224200	22000	5.35064	4.34242	0.811571		51000	80000	4.70757	4.90309	1.04153
	100000	5000	5	3.69897	0.739794		100000	2000	5	3.30103	0.660206		0	8000	1	3.90309	3.90309
	100000	5000	5	3.69897	0.739794		100000	2000	5	3.30103	0.660206		0	8000	1	3.90309	3.90309
	100000	5000	5	3.69897	0.739794		100000	2000	5	3.30103	0.660206		0	8000	1	3.90309	3.90309
	175000	5000	5.24304	3.69897	0.705501		100000	10000	5	4	0.8		0	2000	1	3.30103	3.30103
	175000	5000	5.24304	3.69897	0.705501		100000	10000	5	4	0.8		0	2000	1	3.30103	3.30103
	72930	120000	4.86291	5.07918	1.04447		200000	0	5.30103	0	0		50800	600	4.70586	2.77815	0.590359
	8000	5000	3.90309	3.69897	0.947703		14000	3200	4.14613	3.50515	0.845403		8300	1000	3.91908	3	0.765486
	100000	120000	5	5.07918	1.01584		85010	200	4.92947	2.30103	0.466791		0	10000	1	4	4
	100000	5000	5	3.69897	0.739794		73750	600	4.86776	2.77815	0.570725		30400	7000	4.48287	3.8451	0.857731
	150000	120000	5.17609	5.07918	0.981277		250000	10000	5.39794	4	0.741023		0	2000	1	3.30103	3.30103
	100000	5000	5	3.69897	0.739794		80000	180	4.90309	2.25527	0.45997		30000	0	4.47712	0	0
	20000	5000	4.30103	3.69897	0.86002		72000	4000	4.85733	3.60206	0.741572		70000	1000	4.8451	3	0.619183
	80000	5000	4.90309	3.69897	0.754416		60000	28000	4.77815	4.44716	0.930728		0	8000	1	3.90309	3.90309
	50000	120000	4.69897	5.07918	1.08091		60000	3000	4.77815	3.47712	0.727713		10680	1000	4.02857	3	0.744681
	15000	120000	4.17609	5.07918	1.21625		16000	4000	4.20412	3.60206	0.856793		14000	1000	4.14613	3	0.723567
	61200	5000	4.78675	3.69897	0.772752		64200	15000	4.80754	4.17609	0.868655		42680	40000	4.63022	4.60206	0.993917
	150000	120000	5.17609	5.07918	0.981277		50800	5000	4.70586	3.69897	0.786034		160	20000	2.20412	4.30103	1.95136
	200000	120000	5.30103	5.07918	0.95815		270000	5613.27	5.43136	3.74922	0.69029		140000	4859.94	5.14613	3.68663	0.716389
	100000	5000	5	3.69897	0.739794		140000	1000	5.14613	3	0.582963		0	1000	1	3	3
	150000	120000	5.17609	5.07918	0.981277		100000	500	5	2.69897	0.539794		500	1000	2.69897	3	1.11154
	150000	120000	5.17609	5.07918	0.981277		100000	500	5	2.69897	0.539794		500	1000	2.69897	3	1.11154
	37500	5000	4.57403	3.69897	0.808689		190000	2000	5.27875	3.30103	0.625343		0	0	0	0	0
	162000	120000	5.20952	5.07918	0.974982		40200	500	4.60423	2.69897	0.586194		40012	3000	4.60219	3.47712	0.755536
	40000	120000	4.60206	5.07918	1.10368		28340	6000	4.4524	3.77815	0.848565		68290	3600	4.83436	3.5563	0.735631
	87800	5000	4.94349	3.69897	0.74825		15000	5613.27	4.17609	3.74922	0.897781		30270	10000	4.48101	4	0.892655
	15000	120000	4.17609	5.07918	1.21625		13200	2000	4.12057	3.30103	0.801109		65560	2000	4.81664	3.30103	0.685339
	29560	5000	4.4707	3.69897	0.82738		20000	5000	4.30103	3.69897	0.86002		9640	0	3.98408	0	0
	10000	5000	4	3.69897	0.924743		7740	2000	3.88874	3.30103	0.848869		6720	1000	3.82737	3	0.783828
	12650	120000	4.10209	5.07918	1.23819		1020	1000	3.0086	3	0.997141		9980	1200	3.99913	3.07918	0.769963
	270840	5000	5.43271	3.69897	0.68087		200000	2000	5.30103	3.30103	0.622715		41600	2500	4.61909	3.39794	0.735629
	37500	120000	4.57403	5.07918	1.11044		85	0	1.92942	0	0		24500	6000	4.38917	3.77815	0.86079
	32000	120000	4.50515	5.07918	1.12742		10000	2000	4	3.30103	0.825257		39550	400	4.59715	2.60206	0.566016
	180000	5000	5.25527	3.69897	0.703859		50000	300	4.69897	2.47712	0.527163		83000	0	4.91908	0	0
	20000	120000	4.30103	5.07918	1.18092		100000	1000	5	3	0.6		287050	1500	5.45796	3.17609	0.581919
	20000	120000	4.30103	5.07918	1.18092		100000	1000	5	3	0.6		287050	1500	5.45796	3.17609	0.581919
	45000	5000	4.65321	3.69897	0.794928		35355	10000	4.54845	4	0.87942		51600	0	4.71265	0	0
	50000	120000	4.69897	5.07918	1.08091		38005	2000	4.57984	3.30103	0.720774		0	2000	1	3.30103	3.30103
	100000	120000	5	5.07918	1.01584		40000	10000	4.60206	4	0.869176		80840	10000	4.90763	4	0.815058
	20000	5000	4.30103	3.69897	0.86002		20000	5613.27	4.30103	3.74922	0.871702		32300	3000	4.5092	3.47712	0.771117
	20000	120000	4.30103	5.07918	1.18092		20000	6000	4.30103	3.77815	0.878429		1800	5000	3.25527	3.69897	1.1363
	3000	5000	3.47712	3.69897	1.0638		3000	600	3.47712	2.77815	0.79898		4800	500	3.68124	2.69897	0.733168
	40000	5000	4.60206	3.69897	0.803764		30000	2000	4.47712	3.30103	0.737311		54190	200	4.73392	2.30103	0.486073
	63400	120000	4.80209	5.07918	1.0577		10800	5613.27	4.03342	3.74922	0.929537		6200	5000	3.79239	3.69897	0.975366
[truncated: 3,755 more rows]

## Sheet: CFPS panel data for multi-povey
			2018 year				2016 year				2014 year				2014-2018 长期贫困筛选
fid18	fid16	fid14	multi-poverty,k=30,yes=1,no=0	multi-poverty,k=35	multi-poverty,k=40	GTP,yes=1,no=0	multi-poverty,k=30,yes=1,no=0	multi-poverty,k=35	multi-poverty,k=40	GTP,yes=1,no=0	multi-poverty,k=30,yes=1,no=0	multi-poverty,k=35	multi-poverty,k=40	GTP,yes=1,no=0
130094	130094	130094	0	0	0	1	0	0	0	1	1	1	1	1
100435	100435	100435	0	0	0	0	0	0	0	0	0	0	0	0
130281	130281	130281	1	1	1	1	1	1	1	1	1	1	1	0
101129	101129	101129	1	0	0	1	1	1	1	0	1	1	1	1
101274	101274	140093	0	0	0	0	0	0	0	1	0	0	0	1
102571	102571	210413	1	0	0	0	1	0	0	1	1	0	0	1
106761	106761	106761	0	0	0	0	0	0	0	0	0	0	0	0
106971	106971	330222	0	0	0	0	0	0	0	0	0	0	0	1
107463	107463	350103	0	0	0	0	0	0	0	0	1	0	0	0
109404	109404	411044	0	0	0	1	0	0	0	1	0	0	0	1
110519	110519	110519	0	0	0	1	0	0	0	0	0	0	0	0
110722	110722	110722	0	0	0	0	0	0	0	0	1	0	0	1
110935	110935	110935	0	0	0	1	0	0	0	0	0	0	0	0
111230	111230	440460	0	0	0	1	0	0	0	0	1	1	1	1
440460	440460	440460	0	0	0	1	0	0	0	0	1	1	1	1
111308	111308	440560	1	0	0	0	0	0	0	0	0	0	0	0
113205	113205	510432	0	0	0	0	1	0	0	1	0	0	0	1
114130	114130	530046	0	0	0	1	0	0	0	0	0	0	0	1
680883	530121	530121	1	0	0	0	0	0	0	0	0	0	0	1
114900	114900	114900	0	0	0	0	0	0	0	1	0	0	0	0
115057	115057	620248	0	0	0	0	0	0	0	1	0	0	0	1
115395	115395	115395	0	0	0	0	1	0	0	1	0	0	0	0
115509	115509	620811	1	0	0	0	1	0	0	0	0	0	0	0
520535	520535	520535	0	0	0	0	0	0	0	0	0	0	0	1
621523	621523	621523	0	0	0	0	1	1	1	1	1	0	0	1
117227	117227	130268	0	0	0	0	0	0	0	0	0	0	0	0
621511	621511	621511	1	0	0	1	0	0	0	1	1	1	1	1
118291	118291	118291	0	0	0	0	0	0	0	0	1	0	0	0
198275	198275	198275	0	0	0	0	0	0	0	0	1	0	0	0
120073	120073	120073	0	0	0	0	0	0	0	0	1	0	0	0
120074	120074	120074	0	0	0	0	0	0	0	0	0	0	0	0
120075	120075	120075	0	0	0	0	0	0	0	0	0	0	0	0
120076	120076	120076	0	0	0	0	0	0	0	0	0	0	0	0
120077	120077	120077	1	0	0	0	0	0	0	0	0	0	0	0
120078	120078	120078	1	0	0	0	0	0	0	0	0	0	0	0
120080	120080	120080	1	0	0	0	0	0	0	0	0	0	0	0
120081	120081	120081	1	1	1	1	0	0	0	1	1	0	0	1
120082	120082	120082	1	1	1	0	0	0	0	0	0	0	0	0
120087	120087	120087	1	0	0	0	0	0	0	0	0	0	0	0
120089	120089	120089	0	0	0	0	1	0	0	0	1	0	0	1
120090	120090	120090	1	0	0	0	1	0	0	0	1	0	0	0
120091	120091	120091	0	0	0	0	0	0	0	0	0	0	0	1
120093	120093	120093	0	0	0	0	1	1	1	0	1	1	1	1
120095	120095	120095	0	0	0	0	0	0	0	0	1	0	0	0
120096	120096	120096	1	0	0	0	0	0	0	0	0	0	0	0
116939	116939	120096	1	0	0	0	0	0	0	0	0	0	0	0
120097	120097	120097	0	0	0	1	0	0	0	0	1	0	0	0
120100	120100	120100	1	0	0	1	1	0	0	1	0	0	0	1
120101	120101	120101	1	1	1	0	0	0	0	1	0	0	0	1
120102	120102	120102	1	1	1	1	1	1	1	1	1	0	0	1
120104	120104	120104	0	0	0	1	1	0	0	0	0	0	0	1
440226	440226	440226	1	0	0	0	1	0	0	0	1	0	0	1
124495	124495	360290	0	0	0	0	0	0	0	0	1	0	0	1
125984	125984	410917	0	0	0	0	0	0	0	0	1	0	0	1
127580	127580	127580	0	0	0	1	0	0	0	0	0	0	0	0
360321	360321	360321	1	1	1	1	0	0	0	0	0	0	0	0
127889	127889	440560	1	0	0	0	0	0	0	0	0	0	0	0
128367	128367	128367	1	0	0	0	0	0	0	0	0	0	0	0
128750	128750	128750	0	0	0	0	0	0	0	0	0	0	0	0
128969	128969	128969	0	0	0	0	0	0	0	0	0	0	0	0
410793	410793	410793	0	0	0	1	1	0	0	1	1	0	0	0
130001	130001	130001	1	1	1	1	1	1	1	0	1	0	0	0
130002	130002	130002	1	1	1	0	0	0	0	0	1	0	0	1
130004	130004	130004	0	0	0	0	0	0	0	0	0	0	0	0
130005	130005	130005	1	0	0	1	0	0	0	0	1	0	0	0
130007	130007	130007	1	0	0	0	1	0	0	0	1	1	1	1
130010	130010	130010	1	0	0	0	1	0	0	0	1	0	0	0
130011	130011	130011	0	0	0	0	0	0	0	1	1	0	0	0
130012	130012	130012	0	0	0	1	1	0	0	0	1	0	0	1
130013	130013	130013	0	0	0	1	1	0	0	0	1	1	1	1
130017	130017	130017	0	0	0	0	1	0	0	0	1	1	1	1
198382	198382	198382	1	0	0	0	0	0	0	0	0	0	0	0
130019	130019	130019	1	1	1	1	1	0	0	1	1	1	1	1
130020	130020	130020	1	1	1	1	1	0	0	0	1	1	1	1
130022	130022	130022	1	1	1	1	0	0	0	0	0	0	0	0
130024	130024	130024	0	0	0	0	1	0	0	0	1	1	1	0
130027	130027	130027	0	0	0	0	0	0	0	1	1	0	0	1
130028	130028	130028	1	0	0	0	1	0	0	0	0	0	0	1
130057	130057	130057	1	1	1	0	1	0	0	1	1	0	0	1
130058	130058	130058	1	1	1	1	0	0	0	1	1	0	0	1
130059	130059	130059	1	0	0	1	0	0	0	1	0	0	0	1
130060	130060	130060	1	0	0	0	1	0	0	0	1	0	0	1
130062	130062	130062	1	1	1	0	0	0	0	1	1	0	0	0
130063	130063	130063	0	0	0	1	1	0	0	1	0	0	0	1
130064	130064	130064	0	0	0	1	0	0	0	1	0	0	0	1
130065	130065	130065	1	0	0	1	1	0	0	1	1	0	0	1
130066	130066	130066	0	0	0	1	0	0	0	1	0	0	0	1
130067	130067	130067	1	1	1	1	1	0	0	1	0	0	0	1
130068	130068	130068	1	0	0	1	1	1	1	1	1	1	1	0
239119	239119	239119	0	0	0	0	0	0	0	0	0	0	0	0
130069	130069	130069	0	0	0	0	1	0	0	1	0	0	0	0
130070	130070	130070	1	0	0	0	0	0	0	1	0	0	0	1
130072	130072	130072	1	0	0	0	0	0	0	0	0	0	0	0
130073	130073	130073	1	0	0	1	0	0	0	0	0	0	0	1
130074	130074	130074	1	1	1	1	1	0	0	1	0	0	0	1
139778	139778	139778	0	0	0	0	0	0	0	1	0	0	0	0
130075	130075	130075	0	0	0	0	0	0	0	1	0	0	0	1
130076	130076	130076	0	0	0	1	0	0	0	1	0	0	0	1
130077	130077	130077	0	0	0	0	1	0	0	1	0	0	0	1
130078	130078	130078	1	0	0	1	0	0	0	1	0	0	0	1
130079	130079	130079	0	0	0	0	1	0	0	1	1	1	1	1
130080	130080	130080	0	0	0	0	0	0	0	1	0	0	0	1
130082	130082	130082	1	0	0	1	0	0	0	0	1	0	0	1
130083	130083	130083	1	0	0	1	0	0	0	1	1	0	0	1
130085	130085	130085	1	1	1	1	0	0	0	1	0	0	0	1
130086	130086	130086	0	0	0	1	0	0	0	1	0	0	0	1
130089	130089	130089	1	1	1	1	0	0	0	1	1	0	0	1
130092	130092	130092	0	0	0	1	0	0	0	0	0	0	0	0
130093	130093	130093	1	0	0	1	1	0	0	1	1	0	0	1
284247	284247	130093	1	0	0	1	1	0	0	1	1	0	0	1
130095	130095	130095	1	0	0	0	1	1	1	1	1	1	1	1
130096	130096	130096	1	0	0	1	1	0	0	1	0	0	0	1
130097	130097	130097	0	0	0	0	0	0	0	1	1	1	1	1
130099	130099	130099	1	1	1	1	0	0	0	1	0	0	0	1
130100	130100	130100	0	0	0	1	1	0	0	1	1	1	1	1
130101	130101	130101	0	0	0	0	0	0	0	0	0	0	0	0
130102	130102	130102	1	0	0	0	0	0	0	0	0	0	0	0
130103	130103	130103	0	0	0	1	0	0	0	0	0	0	0	1
130104	130104	130104	1	1	1	1	1	0	0	0	1	0	0	0
130105	130105	130105	0	0	0	1	0	0	0	0	1	0	0	1
130106	130106	130106	0	0	0	1	1	0	0	1	0	0	0	1
130107	130107	130107	0	0	0	1	0	0	0	1	0	0	0	1
130109	130109	130109	1	1	1	1	1	0	0	1	1	0	0	0
130148	130148	130148	1	0	0	0	0	0	0	1	1	1	1	1
130149	130149	130149	0	0	0	0	0	0	0	0	0	0	0	1
130150	130150	130150	1	0	0	0	0	0	0	0	0	0	0	0
130151	130151	130151	1	1	1	0	1	0	0	0	0	0	0	0
130152	130152	130152	0	0	0	0	0	0	0	0	0	0	0	0
130155	130155	130155	1	0	0	1	0	0	0	0	0	0	0	1
130158	130158	130158	0	0	0	0	0	0	0	1	0	0	0	1
130161	130161	130161	0	0	0	1	0	0	0	1	0	0	0	1
130162	130162	130162	0	0	0	1	0	0	0	0	1	0	0	1
130164	130164	130164	0	0	0	1	0	0	0	1	0	0	0	1
130165	130165	130165	1	0	0	0	1	0	0	0	0	0	0	1
130166	130166	130166	1	1	1	0	1	1	1	1	0	0	0	1
100531	100531	130167	0	0	0	1	0	0	0	0	1	0	0	1
130167	130167	130167	0	0	0	1	0	0	0	0	1	0	0	1
130168	130168	130168	0	0	0	0	0	0	0	1	0	0	0	1
130169	130169	130169	0	0	0	0	1	0	0	0	0	0	0	1
130265	130265	130265	1	0	0	0	0	0	0	1	1	1	1	1
130266	130266	130266	0	0	0	0	0	0	0	0	1	1	1	1
130268	130268	130268	0	0	0	0	0	0	0	0	0	0	0	0
130272	130272	130272	0	0	0	0	0	0	0	0	0	0	0	0
130279	130279	130279	0	0	0	1	0	0	0	1	0	0	0	0
130282	130282	130282	1	1	1	1	1	0	0	0	1	0	0	1
130283	130283	130283	1	0	0	1	0	0	0	1	0	0	0	1
130285	130285	130285	0	0	0	1	1	0	0	0	0	0	0	0
130286	130286	130286	0	0	0	1	1	0	0	1	0	0	0	1
130289	130289	130289	1	0	0	0	1	1	1	0	1	1	1	1
130291	130291	130291	0	0	0	1	0	0	0	0	0	0	0	0
130292	130292	130292	1	0	0	1	0	0	0	0	0	0	0	0
556568	130292	130292	1	0	0	1	0	0	0	0	0	0	0	0
130330	130330	130330	0	0	0	1	0	0	0	1	0	0	0	1
130332	130332	130332	0	0	0	1	0	0	0	1	0	0	0	1
130333	130333	130333	0	0	0	0	0	0	0	1	0	0	0	1
130336	130336	130336	0	0	0	0	1	0	0	1	0	0	0	1
556602	130336	130336	0	0	0	0	1	0	0	1	0	0	0	1
130338	130338	130338	0	0	0	0	0	0	0	0	0	0	0	1
130339	130339	130339	1	0	0	1	1	1	1	1	0	0	0	1
130340	130340	130340	0	0	0	1	1	0	0	1	0	0	0	1
130342	130342	130342	0	0	0	1	0	0	0	1	0	0	0	1
130345	130345	130345	0	0	0	1	1	0	0	1	1	0	0	1
130348	130348	130348	0	0	0	1	1	1	1	1	0	0	0	1
130389	130389	130389	1	0	0	0	1	0	0	1	1	0	0	1
130391	130391	130391	1	1	1	0	1	0	0	1	1	0	0	1
130392	130392	130392	0	0	0	0	0	0	0	0	0	0	0	0
130393	130393	130393	1	1	1	0	1	1	1	1	1	1	1	1
130396	130396	130396	1	1	1	0	0	0	0	0	1	0	0	0
130397	130397	130397	1	0	0	0	0	0	0	1	0	0	0	1
130398	130398	130398	0	0	0	0	0	0	0	0	0	0	0	1
130399	130399	130399	0	0	0	0	0	0	0	0	0	0	0	1
130406	130406	130406	0	0	0	1	1	0	0	1	1	0	0	1
130410	130410	130410	0	0	0	0	1	0	0	0	1	0	0	1
130411	130411	130411	0	0	0	0	0	0	0	1	0	0	0	1
130413	130413	130413	1	0	0	1	0	0	0	1	0	0	0	1
130415	130415	130415	1	1	1	1	0	0	0	1	0	0	0	0
130416	130416	130416	0	0	0	1	0	0	0	1	0	0	0	1
666316	130416	130416	0	0	0	1	0	0	0	1	0	0	0	1
130417	130417	130417	0	0	0	0	0	0	0	0	1	0	0	1
117324	117324	130417	0	0	0	0	0	0	0	0	1	0	0	1
130418	130418	130418	1	1	1	1	0	0	0	1	1	0	0	1
130420	130420	130420	1	0	0	1	0	0	0	1	0	0	0	1
130424	130424	130424	0	0	0	1	0	0	0	1	0	0	0	1
130425	130425	130425	0	0	0	1	0	0	0	1	0	0	0	1
130426	130426	130426	1	0	0	1	0	0	0	1	1	0	0	0
277960	277960	277960	0	0	0	0	0	0	0	0	1	0	0	0
130428	130428	130428	0	0	0	0	0	0	0	1	1	1	1	1
130430	130430	130430	0	0	0	0	1	0	0	0	0	0	0	1
691348	691348	691348	1	0	0	0	0	0	0	1	0	0	0	0
130431	130431	130431	0	0	0	0	0	0	0	1	0	0	0	0
130433	130433	130433	1	0	0	0	0	0	0	1	1	0	0	1
130435	130435	130435	0	0	0	0	0	0	0	1	0	0	0	1
130437	130437	130437	0	0	0	0	0	0	0	1	0	0	0	1
130438	130438	130438	0	0	0	0	0	0	0	1	0	0	0	1
130439	130439	130439	0	0	0	1	0	0	0	1	0	0	0	1
130443	130443	130443	1	0	0	1	1	0	0	1	0	0	0	1
556668	130443	130443	1	0	0	1	1	0	0	1	0	0	0	1
130445	130445	130445	0	0	0	0	0	0	0	1	0	0	0	1
130449	130449	130449	0	0	0	1	1	0	0	0	1	0	0	1
130451	130451	130451	1	1	1	1	1	1	1	0	1	1	1	1
130452	130452	130452	1	0	0	1	1	0	0	1	0	0	0	1
130453	130453	130453	1	0	0	1	0	0	0	1	0	0	0	1
130457	130457	130457	0	0	0	1	1	0	0	1	0	0	0	1
130458	130458	130458	1	0	0	1	0	0	0	1	0	0	0	1
130459	130459	130459	1	0	0	0	0	0	0	1	0	0	0	1
130462	130462	130462	0	0	0	1	1	0	0	1	1	1	1	1
201339	201339	130462	0	0	0	1	1	0	0	1	1	1	1	1
130463	130463	130463	0	0	0	0	0	0	0	0	1	1	1	1
100733	100733	130463	0	0	0	0	0	0	0	0	1	1	1	1
130464	130464	130464	1	0	0	1	1	1	1	1	1	1	1	0
130465	130465	130465	1	1	1	0	1	1	1	0	1	1	1	0
130467	130467	130467	0	0	0	0	0	0	0	1	0	0	0	1
693940	693940	693940	0	0	0	0	0	0	0	0	0	0	0	0
130497	130497	130497	0	0	0	0	0	0	0	0	0	0	0	1
130501	130501	130501	1	0	0	0	0	0	0	0	0	0	0	1
130502	130502	130502	0	0	0	0	0	0	0	1	0	0	0	1
120112	120112	120112	0	0	0	0	0	0	0	0	0	0	0	0
130503	130503	130503	0	0	0	1	1	0	0	1	0	0	0	1
130504	130504	130504	0	0	0	0	0	0	0	0	0	0	0	1
130505	130505	130505	1	0	0	0	1	0	0	0	0	0	0	1
130506	130506	130506	1	0	0	1	0	0	0	0	0	0	0	0
130507	130507	130507	0	0	0	0	0	0	0	1	1	0	0	1
130512	130512	130512	1	0	0	0	0	0	0	0	1	1	1	1
130513	130513	130513	0	0	0	0	0	0	0	1	1	0	0	1
130516	130516	130516	0	0	0	0	0	0	0	0	1	0	0	1
100782	100782	130517	1	0	0	0	0	0	0	0	0	0	0	1
130517	130517	130517	1	0	0	0	0	0	0	0	0	0	0	1
130522	130522	130522	1	0	0	1	1	0	0	0	0	0	0	1
130524	130524	130524	1	0	0	0	0	0	0	1	1	0	0	1
130553	130553	130553	0	0	0	0	0	0	0	0	1	0	0	1
130555	130555	130555	1	0	0	1	0	0	0	1	0	0	0	1
130556	130556	130556	0	0	0	1	0	0	0	1	1	0	0	1
130558	130558	130558	1	1	1	1	1	1	1	1	1	1	1	1
130559	130559	130559	0	0	0	1	0	0	0	1	0	0	0	1
130560	130560	130560	0	0	0	1	0	0	0	1	1	0	0	1
130561	130561	130561	1	1	1	0	0	0	0	1	0	0	0	1
130562	130562	130562	0	0	0	0	0	0	0	1	0	0	0	0
130563	130563	130563	1	0	0	0	0	0	0	1	0	0	0	1
130566	130566	130566	0	0	0	0	0	0	0	1	0	0	0	1
130568	130568	130568	0	0	0	1	0	0	0	1	0	0	0	1
130571	130571	130571	1	0	0	0	0	0	0	1	0	0	0	1
130572	130572	130572	1	0	0	1	0	0	0	1	1	0	0	1
130574	130574	130574	0	0	0	0	0	0	0	1	1	0	0	1
130575	130575	130575	0	0	0	1	0	0	0	1	0	0	0	1
130576	130576	130576	0	0	0	1	0	0	0	1	1	1	1	1
130578	130578	130578	1	1	1	0	0	0	0	0	0	0	0	0
130579	130579	130579	0	0	0	0	0	0	0	0	1	0	0	1
501242	130579	130579	0	0	0	0	0	0	0	0	1	0	0	1
648479	130579	130579	0	0	0	0	0	0	0	0	1	0	0	1
130580	130580	130580	1	0	0	1	1	0	0	1	0	0	0	1
130582	130582	130582	0	0	0	1	1	1	1	1	1	0	0	1
130583	130583	130583	1	0	0	1	1	1	1	1	1	0	0	1
130586	130586	130586	1	0	0	1	1	0	0	1	1	0	0	1
130587	130587	130587	0	0	0	1	0	0	0	0	0	0	0	1
130588	130588	130588	1	0	0	1	1	1	1	1	1	0	0	1
501250	130588	130588	1	0	0	1	1	1	1	1	1	0	0	1
130591	130591	130591	1	0	0	0	1	0	0	1	1	0	0	0
130593	130593	130593	0	0	0	0	1	0	0	0	0	0	0	0
130595	130595	130595	0	0	0	0	1	0	0	0	1	0	0	0
130596	130596	130596	0	0	0	0	1	0	0	1	1	0	0	1
130598	130598	130598	1	0	0	1	1	0	0	1	1	0	0	1
130599	130599	130599	0	0	0	1	0	0	0	0	0	0	0	1
130600	130600	130600	0	0	0	1	1	1	1	1	1	0	0	1
130601	130601	130601	1	0	0	1	0	0	0	1	1	0	0	1
130603	130603	130603	0	0	0	0	0	0	0	1	1	0	0	1
130605	130605	130605	0	0	0	0	1	0	0	0	1	1	1	0
574765	130605	130605	0	0	0	0	1	0	0	0	1	1	1	0
130606	130606	130606	0	0	0	1	1	0	0	1	1	1	1	1
130607	130607	130607	0	0	0	1	0	0	0	1	1	0	0	1
130608	130608	130608	0	0	0	1	1	1	1	1	1	1	1	1
130609	130609	130609	1	1	1	0	0	0	0	0	0	0	0	1
130610	130610	130610	0	0	0	0	0	0	0	0	0	0	0	1
140925	140925	140925	0	0	0	0	0	0	0	0	0	0	0	0
130611	130611	130611	1	0	0	1	0	0	0	0	0	0	0	0
130612	130612	130612	0	0	0	1	0	0	0	1	0	0	0	1
130613	130613	130613	1	1	1	1	0	0	0	1	0	0	0	1
130614	130614	130614	1	0	0	0	0	0	0	0	0	0	0	0
130617	130617	130617	1	1	1	0	1	0	0	1	1	0	0	1
130618	130618	130618	0	0	0	0	0	0	0	0	0	0	0	1
630540	130618	130618	0	0	0	0	0	0	0	0	0	0	0	1
130621	130621	130621	1	0	0	1	0	0	0	1	0	0	0	1
130622	130622	130622	1	0	0	0	0	0	0	0	0	0	0	0
130629	130629	130629	0	0	0	0	0	0	0	0	0	0	0	0
130630	130630	130630	0	0	0	0	0	0	0	0	0	0	0	1
100879	100879	130630	0	0	0	0	0	0	0	0	0	0	0	1
134811	134811	130630	0	0	0	0	0	0	0	0	0	0	0	1
130633	130633	130633	1	0	0	0	1	0	0	0	1	0	0	1
130634	130634	130634	1	0	0	0	0	0	0	0	0	0	0	0
130635	130635	130635	0	0	0	0	0	0	0	1	0	0	0	0
130666	130666	130666	0	0	0	1	0	0	0	1	0	0	0	1
130670	130670	130670	1	0	0	1	1	1	1	0	1	1	1	1
130671	130671	130671	1	0	0	1	1	0	0	1	1	0	0	1
130674	130674	130674	0	0	0	1	0	0	0	0	0	0	0	1
130677	130677	130677	0	0	0	1	0	0	0	1	1	0	0	1
130678	130678	130678	0	0	0	1	0	0	0	1	0	0	0	1
130679	130679	130679	1	1	1	0	0	0	0	1	0	0	0	1
130681	130681	130681	1	0	0	1	0	0	0	1	0	0	0	1
130682	130682	130682	1	0	0	1	1	0	0	1	1	0	0	1
130683	130683	130683	1	0	0	1	0	0	0	1	0	0	0	1
130686	130686	130686	1	0	0	1	1	0	0	1	1	1	1	1
130687	130687	130687	0	0	0	1	0	0	0	1	0	0	0	1
130688	130688	130688	0	0	0	1	0	0	0	1	0	0	0	1
130689	130689	130689	1	1	1	0	1	1	1	1	1	1	1	1
130693	130693	130693	0	0	0	0	0	0	0	0	0	0	0	1
130694	130694	130694	0	0	0	0	1	0	0	1	1	0	0	0
130695	130695	130695	0	0	0	0	0	0	0	0	0	0	0	1
130697	130697	130697	0	0	0	0	0	0	0	1	0	0	0	0
130698	130698	130698	1	0	0	0	1	0	0	0	1	0	0	0
130700	130700	130700	1	1	1	0	0	0	0	0	1	0	0	1
130701	130701	130701	0	0	0	1	0	0	0	0	0	0	0	1
130704	130704	130704	0	0	0	0	1	0	0	1	1	0	0	1
130705	130705	130705	1	0	0	0	1	0	0	1	1	0	0	0
130707	130707	130707	1	0	0	1	0	0	0	1	1	0	0	1
130708	130708	130708	0	0	0	0	0	0	0	1	0	0	0	0
845440	845440	845440	0	0	0	1	0	0	0	1	1	0	0	1
130709	130709	130709	0	0	0	1	0	0	0	0	0	0	0	0
130710	130710	130710	0	0	0	0	1	1	1	0	1	0	0	0
130711	130711	130711	0	0	0	0	1	0	0	0	0	0	0	0
494985	494985	494985	0	0	0	0	0	0	0	0	0	0	0	0
130712	130712	130712	0	0	0	1	1	0	0	0	1	0	0	1
130713	130713	130713	0	0	0	0	0	0	0	0	0	0	0	0
130714	130714	130714	0	0	0	1	1	0	0	1	0	0	0	1
716424	716424	716424	0	0	0	1	0	0	0	0	0	0	0	0
836828	836828	836828	0	0	0	0	0	0	0	0	0	0	0	1
130715	130715	130715	1	0	0	1	1	0	0	1	1	0	0	1
130716	130716	130716	1	0	0	0	1	0	0	0	0	0	0	1
185049	185049	130716	1	0	0	0	1	0	0	0	0	0	0	1
130717	130717	130717	1	0	0	1	0	0	0	0	0	0	0	0
130719	130719	130719	1	1	1	1	0	0	0	1	0	0	0	1
130720	130720	130720	0	0	0	0	0	0	0	1	0	0	0	1
630622	130720	130720	0	0	0	0	0	0	0	1	0	0	0	1
130721	130721	130721	0	0	0	0	1	0	0	0	0	0	0	0
404700	404700	404700	1	0	0	1	1	1	1	1	1	0	0	1
130722	130722	130722	0	0	0	0	1	1	1	0	1	0	0	1
962377	962377	962377	1	1	1	0	1	0	0	0	1	0	0	0
130723	130723	130723	0	0	0	1	0	0	0	0	0	0	0	1
130724	130724	130724	0	0	0	0	1	0	0	0	1	1	1	0
556898	130724	130724	0	0	0	0	1	0	0	0	1	1	1	0
130793	130793	130793	1	1	1	0	1	1	1	1	1	1	1	0
130794	130794	130794	0	0	0	0	1	0	0	0	1	0	0	0
130795	130795	130795	0	0	0	0	0	0	0	0	0	0	0	1
130797	130797	130797	1	0	0	0	1	1	1	1	0	0	0	1
130798	130798	130798	1	0	0	0	0	0	0	1	1	0	0	1
130801	130801	130801	0	0	0	1	0	0	0	1	0	0	0	1
130802	130802	130802	0	0	0	1	0	0	0	1	0	0	0	1
130804	130804	130804	0	0	0	1	0	0	0	1	0	0	0	1
130805	130805	130805	0	0	0	0	0	0	0	0	0	0	0	1
130808	130808	130808	1	0	0	0	0	0	0	0	0	0	0	1
130809	130809	130809	0	0	0	1	0	0	0	1	0	0	0	1
130810	130810	130810	0	0	0	1	1	0	0	1	0	0	0	1
130811	130811	130811	0	0	0	0	0	0	0	0	0	0	0	1
130812	130812	130812	0	0	0	1	0	0	0	1	0	0	0	1
130813	130813	130813	0	0	0	0	0	0	0	1	0	0	0	1
130814	130814	130814	0	0	0	1	1	0	0	1	0	0	0	1
130815	130815	130815	0	0	0	0	0	0	0	0	1	0	0	1
130816	130816	130816	1	0	0	1	1	0	0	1	1	0	0	1
130818	130818	130818	0	0	0	1	0	0	0	1	0	0	0	1
814671	814671	814671	1	0	0	1	0	0	0	1	0	0	0	1
130819	130819	130819	0	0	0	1	0	0	0	1	0	0	0	1
130820	130820	130820	0	0	0	0	0	0	0	1	0	0	0	1
130822	130822	130822	0	0	0	0	0	0	0	1	0	0	0	1
556969	130822	130822	0	0	0	0	0	0	0	1	0	0	0	1
130823	130823	130823	1	0	0	1	0	0	0	1	1	0	0	1
130824	130824	130824	0	0	0	1	0	0	0	1	0	0	0	1
130825	130825	130825	0	0	0	1	0	0	0	1	0	0	0	1
130827	130827	130827	1	0	0	1	1	1	1	1	0	0	0	1
130830	130830	130830	0	0	0	0	0	0	0	0	0	0	0	0
130831	130831	130831	0	0	0	1	0	0	0	1	0	0	0	1
130832	130832	130832	1	0	0	1	0	0	0	0	0	0	0	1
130833	130833	130833	0	0	0	1	0	0	0	1	0	0	0	1
130835	130835	130835	1	1	1	0	0	0	0	1	0	0	0	1
574945	130835	130835	1	1	1	0	0	0	0	1	0	0	0	1
130836	130836	130836	1	1	1	1	1	1	1	1	1	1	1	0
130837	130837	130837	1	0	0	1	1	0	0	1	1	0	0	1
130838	130838	130838	0	0	0	1	0	0	0	1	0	0	0	1
130839	130839	130839	0	0	0	1	0	0	0	1	1	0	0	1
130841	130841	130841	1	1	1	0	1	0	0	0	0	0	0	0
130843	130843	130843	0	0	0	1	0	0	0	1	1	0	0	1
130844	130844	130844	0	0	0	1	1	0	0	1	1	0	0	0
130846	130846	130846	1	0	0	0	0	0	0	0	0	0	0	1
130847	130847	130847	0	0	0	1	0	0	0	1	1	0	0	1
219610	219610	130847	0	0	0	1	0	0	0	1	1	0	0	1
130848	130848	130848	0	0	0	1	0	0	0	1	1	0	0	1
130849	130849	130849	0	0	0	1	0	0	0	0	0	0	0	1
130850	130850	130850	0	0	0	1	0	0	0	1	1	0	0	1
130851	130851	130851	0	0	0	1	0	0	0	1	0	0	0	1
130853	130853	130853	0	0	0	1	1	0	0	1	1	0	0	1
130855	130855	130855	0	0	0	1	0	0	0	1	0	0	0	1
130856	130856	130856	1	0	0	1	0	0	0	0	1	0	0	1
130858	130858	130858	0	0	0	1	1	0	0	0	1	0	0	0
130859	130859	130859	1	0	0	0	0	0	0	0	0	0	0	1
130862	130862	130862	0	0	0	0	1	0	0	1	0	0	0	1
130864	130864	130864	0	0	0	0	0	0	0	0	0	0	0	1
130866	130866	130866	0	0	0	1	0	0	0	1	1	0	0	0
130868	130868	130868	0	0	0	1	1	0	0	1	0	0	0	1
711836	711836	711836	0	0	0	0	0	0	0	0	0	0	0	0
130872	130872	130872	0	0	0	0	0	0	0	0	0	0	0	1
407475	407475	407475	0	0	0	1	0	0	0	0	0	0	0	1
130873	130873	130873	0	0	0	0	0	0	0	1	0	0	0	1
253457	253457	130873	0	0	0	0	0	0	0	1	0	0	0	1
130874	130874	130874	0	0	0	0	1	1	1	1	0	0	0	1
130875	130875	130875	0	0	0	1	0	0	0	1	0	0	0	1
130877	130877	130877	1	1	1	0	0	0	0	1	0	0	0	1
130878	130878	130878	0	0	0	1	1	0	0	1	0	0	0	0
130879	130879	130879	1	0	0	0	0	0	0	0	0	0	0	1
130881	130881	130881	1	0	0	0	0	0	0	1	0	0	0	1
130882	130882	130882	1	1	1	1	1	0	0	0	1	0	0	1
130883	130883	130883	1	0	0	1	1	0	0	1	1	1	1	1
130884	130884	130884	1	1	1	1	1	0	0	1	0	0	0	1
130885	130885	130885	0	0	0	0	0	0	0	1	0	0	0	1
130886	130886	130886	0	0	0	0	1	0	0	1	1	1	1	1
130889	130889	130889	1	0	0	0	1	0	0	1	1	1	1	1
130890	130890	130890	0	0	0	0	0	0	0	1	0	0	0	1
130891	130891	130891	1	0	0	0	1	0	0	0	1	0	0	0
[truncated: 5,340 more rows]

## Sheet: CFPS raw data for rural familie
fid16	fid14	pid_a_1	pid_a_2	pid_a_3	pid_a_4	pid_a_5	pid_a_6	pid_a_7	pid_a_8	pid_a_9	pid_a_10	pid_a_11	pid_a_12	pid_a_13	pid_a_14	pid_a_15	pid_a_16	pid_a_17	pid_a_18	2018 year	Whether or not bronchitis illness has been in the last six months	Whether or not asthma illness has been in the last six month	Whether or not entering the hospital in the past 12 months	Access to the health insurance	The health status by self-reported	Whether or not chronic illness has been in the last six months	multi-poverty	multi=30	multi=35	multi=40	GTP	2016 year	Whether or not bronchitis illness has been in the last six months	Whether or not asthma illness has been in the last six month	Whether or not entering the hospital in the past 12 months	Access to the health insurance	The health status by self-reported	Whether or not chronic illness has been in the last six months	multi-poverty	multi=30	multi=35	multi=40	gtp	2014 year	Whether or not bronchitis illness has been in the last six months	Whether or not asthma illness has been in the last six month	Whether or not entering the hospital in the past 12 months	Access to the health insurance	The health status by self-reported
[truncated: 7,042 more rows]
[truncated: 5 more columns]
